# Supplementary material for: Development of a novel Guinea Pig model producing transgenerational endothelial transcriptional changes driven by maternal food restriction and a second metabolic insult of high fat diet
Source: Front Physiol. 2023 Oct 24;14:1266444. doi: 10.3389/fphys.2023.1266444 (PMC10628814; doi:10.3389/fphys.2023.1266444)
Supplement: Supplementary file 5 [file DataSheet1.xlsx]

## Sheet: Animal Information
offspring_id	trt	maternal_trt	grandmother_trt	generation	prenatal_trt	postnatal_trt	Treatment	sex
GP16.011	second hit diet	100% ad lib	n/a	F1	100% ad lib	High Fat	PC-H	M
GP16.013	control diet	100% ad lib	n/a	F1	100% ad lib	Control	PC-C	M
GP16.016	second hit diet	70% ad lib	n/a	F1	70% ad lib	High Fat	PR-H	M
GP16.017	control diet	70% ad lib	n/a	F1	70% ad lib	Control	PR-C	F
GP16.021	second hit diet	100% ad lib	n/a	F1	100% ad lib	High Fat	PC-H	M
GP16.023	second hit diet	70% ad lib	n/a	F1	70% ad lib	High Fat	PR-H	M
GP16.025	control diet	70% ad lib	n/a	F1	70% ad lib	Control	PR-C	M
GP16.027	control diet	100% ad lib	n/a	F1	100% ad lib	Control	PC-C	M
GP16.028	control diet	100% ad lib	n/a	F1	100% ad lib	Control	PC-C	M
GP16.031	second hit diet	70% ad lib	n/a	F1	70% ad lib	High Fat	PR-H	M
GP16.034	second hit diet (75:25 diet mix after 7.5wks)	100% ad lib	n/a	F1	100% ad lib	High Fat	PC-H	F
GP16.036	control diet	70% ad lib	n/a	F1	70% ad lib	Control	PR-C	M
GP16.041	F2 second hit control	100% ad lib	70% ad lib	F2	70% ad lib	Control	PR-C-C	M
GP16.043	F2 second hit	100% ad lib	70% ad lib	F2	70% ad lib	High Fat	PR-C-H	M
GP16.046	F2 second hit	100% ad lib	70% ad lib	F2	70% ad lib	High Fat	PR-C-H	F
GP16.047	F2 second hit control	100% ad lib	70% ad lib	F2	70% ad lib	Control	PR-C-C	F
GP16.050	F2 second hit	100% ad lib	100% ad lib	F2	100% ad lib	High Fat	PC-C-H	F
GP16.052	F2 second hit control	100% ad lib	100% ad lib	F2	100% ad lib	Control	PC-C-C	M
GP16.053	F2 second hit	100% ad lib	100% ad lib	F2	100% ad lib	High Fat	PC-C-H	M
GP16.054	F2 second hit control	100% ad lib	100% ad lib	F2	100% ad lib	Control	PC-C-C	M
GP16.055	F2 second hit control	100% ad lib	100% ad lib	F2	100% ad lib	Control	PC-C-C	F
GP16.058	F2 second hit control	100% ad lib	70% ad lib	F2	70% ad lib	Control	PR-C-C	M
GP16.059	F2 second hit	100% ad lib	70% ad lib	F2	70% ad lib	High Fat	PR-C-H	M

## Sheet: Normalized Counts
	GP16.011	GP16.013	GP16.016	GP16.017	GP16.021	GP16.023	GP16.025	GP16.027	GP16.028	GP16.031	GP16.034	GP16.036	GP16.041	GP16.043	GP16.046	GP16.047	GP16.050	GP16.052	GP16.053	GP16.054	GP16.055	GP16.058	GP16.059
ENSCPOG00000000007	243.173	289.505	253.074	231.558	279.68	306.082	292.28	314.526	334.777	210.975	303.316	286.536	200.1	287.402	366.476	347.687	328.585	234.32	297.159	345.832	306.734	257.999	285.352
ENSCPOG00000000013	386.537	5.18826	13.9627	6.61594	51.2235	357.65	335.343	25.4756	11.4781	30.5241	383.524	64.4706	1.80271	28.4244	21.9337	24.5578	338.517	101.249	25.6336	3.732	2.27211	28.7768	15.4767
ENSCPOG00000000015	418.294	445.152	567.236	465.951	567.557	420.031	390.317	518.331	566.251	576.367	675.777	322.353	612.92	429.524	536.463	497.618	537.158	522.64	559.191	572.239	610.06	643.013	463.335
ENSCPOG00000000016	0	0	0	0	0	0	0	0.979832	0	5.3866	0	0	0	0	3.65562	0	0.82767	0	2.84817	0	2.27211	0	0
ENSCPOG00000000018	0	3.11295	16.5807	16.0673	7.17129	7.4857	0.916238	0	5.73903	2.6933	2.7658	5.11672	0	0.789566	3.65562	21.9728	7.44903	0	0	0	1.13605	2.97691	14.5094
ENSCPOG00000000020	696.855	739.845	686.791	806.199	794.989	708.646	760.477	879.889	705.901	932.78	611.242	827.885	785.98	886.683	768.595	793.604	854.155	729.961	817.426	823.527	777.06	707.512	797.052
ENSCPOG00000000022	2.72209	86.125	13.9627	40.6407	54.2969	47.4094	16.4923	34.2941	20.0866	15.262	35.9554	64.4706	30.646	28.4244	44.7814	43.9455	27.3131	43.3926	36.0769	39.808	47.7142	21.8307	32.8881
ENSCPOG00000000023	5540.36	4523.12	4155.65	4570.67	3736.24	2961.84	5526.75	3976.16	4072.8	4662.1	7799.55	3051.61	3275.52	2890.6	3638.26	3076.19	3020.99	3366.3	2931.72	2454.41	2283.47	2831.04	4858.73
ENSCPOG00000000024	936.399	1713.16	1275.84	1477.24	1285.71	1481.34	746.734	1522.66	1252.07	1429.25	602.022	1512.5	1781.07	1935.23	1748.3	1089.59	1506.36	1463.78	1368.07	1308.69	1789.28	1403.12	1334.87
ENSCPOG00000000031	1205.89	802.104	929.394	1029.25	925.097	897.452	962.966	902.425	942.158	1127.6	1528.56	808.441	1128.49	923.792	883.747	1021.09	1032.1	856.281	829.768	1102.18	965.645	1122.3	1028.24
ENSCPOG00000000032	2977.97	2108.51	2693.06	2537.68	3024.24	2513.53	3069.4	2661.22	3145.95	2358.43	2935.43	2338.34	1963.15	2391.6	2615.6	2784.08	2926.64	2839.81	2318.41	2502.93	2502.72	2842.95	2810.96
ENSCPOG00000000035	4387.1	5110.43	5729.08	6048.86	5822.07	5225.02	5290.36	6041.64	5315.3	5810.35	5491.96	4977.54	7403.71	6697.89	6082.04	6366.93	5640.57	5754.83	7465.06	7131.84	6616.37	4748.17	4980.61
ENSCPOG00000000036	10.8884	0	0	0.945134	0	0	0	0	0	4.48884	4.60967	11.2568	0	0	1.82781	3.87755	0	8.67853	0	0	3.40816	1.98461	0.967296
ENSCPOG00000000038	385.629	280.166	243.475	285.43	329.879	320.222	187.829	202.825	183.649	329.481	169.636	278.349	129.795	341.882	273.258	103.401	442.803	267.106	262.032	144.304	134.054	366.16	328.881
ENSCPOG00000000040	10.8884	21.7907	15.7081	2.8354	0	13.3079	0.916238	0	27.7387	8.97767	33.1896	31.7236	1.80271	3.15826	0.913906	12.9252	3.31068	85.821	12.3421	7.46399	2.27211	12.8999	9.67296
ENSCPOG00000000044	2568.75	2801.66	2070.85	1897.83	2358.33	1911.35	2314.42	2347.68	3085.69	2052.3	2506.74	2290.24	1896.45	1912.33	1982.26	2983.13	1911.09	2376.95	2324.11	2373.55	2215.3	2582.97	1997.47
ENSCPOG00000000046	61.7007	149.422	72.4316	77.501	107.569	98.9776	101.702	48.0118	75.5639	39.5018	50.7063	105.404	90.1353	54.4801	97.7879	125.374	64.5582	67.4997	52.2165	52.2479	80.6598	57.5536	74.4818
ENSCPOG00000000047	1752.12	2115.77	1500.12	1222.06	1537.73	1400.66	1682.21	1749	2595.96	1137.47	1829.12	1421.42	1022.13	1231.72	1470.47	1945.24	1239.85	1660.49	1512.38	1452.99	1633.64	1638.29	1436.43
ENSCPOG00000000048	4378.03	3412.83	3447.92	2907.23	3079.56	2597.54	3505.53	3010.04	3510.37	3337.9	5384.09	3048.54	2572.46	2675.05	2828.54	3290.74	2756.14	3649.8	2980.14	2902.25	2448.19	3240.86	3374.9
ENSCPOG00000000051	808.461	1024.16	750.496	710.741	671.028	548.951	725.66	824.039	893.376	708.338	932.996	896.449	749.925	651.392	639.734	1057.28	604.199	866.889	717.74	918.071	716.849	796.82	802.856
ENSCPOG00000000052	587.064	642.306	948.592	769.339	704.836	771.859	771.472	843.635	678.162	838.515	702.513	624.24	1023.94	836.15	849.019	730.271	852.5	721.282	587.673	848.407	912.25	828.573	702.257
ENSCPOG00000000057	7599.17	6147.05	7070.37	6814.41	7876.13	6776.22	6838.8	7080.27	5493.21	8518.91	8338.88	6247.51	7481.23	7330.33	7195.18	6833.53	6954.91	6001.68	7830.58	6368.03	6102.88	7587.15	6849.42
ENSCPOG00000000058	154.252	105.84	202.459	188.082	168.013	122.266	289.531	132.277	189.388	159.803	268.283	223.089	138.808	176.863	112.41	135.714	63.7306	198.642	151.903	217.7	160.183	110.146	188.623
ENSCPOG00000000059	170.584	217.907	379.611	267.473	325.782	296.933	335.343	342.941	313.734	365.391	231.405	235.369	443.466	405.837	427.708	301.156	300.444	294.106	347.477	422.96	318.095	304.637	265.039
ENSCPOG00000000061	777.61	659.946	486.077	447.048	467.159	491.561	715.582	614.355	675.293	442.599	540.253	798.208	277.617	427.155	578.503	598.435	501.568	607.497	551.596	437.888	533.945	533.859	519.438
ENSCPOG00000000064	1.81473	2.0753	0	9.45134	25.6118	0.831744	0	8.81849	2.86952	0	23.9703	7.1634	9.01353	5.52696	2.74172	1.29252	0.82767	13.4999	9.49391	1.244	6.81632	0.992303	3.86918
ENSCPOG00000000066	38.1093	60.1838	93.3757	96.4036	54.2969	69.0348	73.299	44.0924	100.433	107.732	94.9591	99.2643	37.8568	71.0609	84.9933	46.5306	37.2451	49.1783	67.4068	62.1999	51.1224	67.4766	55.1359
ENSCPOG00000000067	994.47	1026.24	1141.45	957.42	903.583	1267.58	1126.06	1044.5	1125.81	1080.01	660.104	1117.49	1076.22	1350.16	1042.77	1072.79	1128.94	1061.67	1190.54	1148.21	1117.88	1133.21	1240.07
ENSCPOG00000000069	55.3492	50.8449	87.267	76.5558	97.3247	65.7078	47.6444	48.0118	58.3468	42.1951	52.5502	46.0505	27.0406	59.2174	42.9536	15.5102	72.8349	53.0354	37.0263	48.5159	43.17	28.7768	54.1686
ENSCPOG00000000070	0	0	0	2.8354	0	0	0	0	0	3.59107	0	0	0	0	0	2.58503	0	12.5357	0	0	1.13605	0	0
ENSCPOG00000000072	3833.61	3416.99	3991.59	3996.03	4147.06	3388.53	4365.87	4475.87	4355.93	3547.98	3864.74	3705.53	3261.09	3828.61	3664.76	3438.09	3428.21	4406.76	4190.61	3727.02	3117.33	3572.29	3928.19
ENSCPOG00000000073	21.7767	41.506	22.6894	18.9027	26.6362	13.3079	10.0786	29.395	20.0866	32.3196	36.8773	37.8637	46.8703	25.2661	22.8477	47.8231	25.6578	26.0356	29.4311	53.4919	54.5305	43.6613	20.3132
ENSCPOG00000000074	15.4252	5.18826	0	7.56107	7.17129	2.49523	11.9111	16.6571	0	2.6933	12.9071	1.02334	10.8162	3.15826	2.74172	1.29252	6.62136	16.3928	0	4.97599	7.95237	8.93073	0
ENSCPOG00000000075	212.323	331.011	184.133	242.899	186.454	153.873	274.871	251.817	264.952	207.384	326.364	287.56	192.889	252.661	232.132	342.517	241.68	224.677	189.878	330.904	339.68	180.599	196.361
ENSCPOG00000000076	2160.43	2329.53	1890.2	1956.43	1774.38	1914.68	2108.26	1479.55	1658.58	1598.03	1178.23	1592.32	1469.2	1695.2	1698.04	1857.34	2314.99	1564.06	2307.97	1240.27	1337.13	2088.8	1468.36
ENSCPOG00000000077	870.161	1137.27	1279.33	1333.58	1469.09	1429.77	982.207	1200.29	1015.81	1371.79	818.677	1074.51	1645.87	1139.34	1293.18	1158.09	1427.73	1115.67	1075.66	1344.76	1365.54	1201.68	991.478
ENSCPOG00000000078	0	0	0	0	0	0	9.16238	0	6.69554	0	0	0	0	2.3687	6.39734	0	1.65534	9.64281	0	6.21999	4.54421	0	0
ENSCPOG00000000079	0	0	0	3.78053	0	2.49523	0.916238	0	0	0	0	6.14006	0	0.789566	5.48344	0	2.48301	0	3.79756	1.244	0	1.98461	0
ENSCPOG00000000082	650.579	503.261	397.938	508.482	437.449	673.713	833.776	681.963	455.297	437.213	261.829	495.298	306.46	277.138	578.503	548.027	605.854	344.248	369.313	498.843	495.319	325.476	622.939
ENSCPOG00000000083	38.1093	102.727	20.9441	74.6656	71.7129	118.939	16.4923	56.8303	18.1736	83.4923	47.9405	63.4473	36.0541	41.0574	48.437	18.0952	33.9345	24.107	34.1781	23.636	43.17	32.746	36.7572
ENSCPOG00000000086	137.012	155.648	37.5248	67.1045	50.1991	84.8379	61.3879	28.4151	13.3911	56.5593	287.643	79.8208	43.2649	56.0592	71.2847	24.5578	78.6286	126.321	169.941	97.0319	36.3537	47.6306	35.79
ENSCPOG00000000091	52.6271	60.1838	25.3074	18.9027	26.6362	25.7841	32.9846	19.5966	51.6513	24.2397	48.8625	15.3502	30.646	17.3705	21.0198	32.3129	36.4175	26.0356	45.5708	18.66	30.6734	52.5921	30.9535
ENSCPOG00000000094	123.401	46.6943	123.046	103.965	97.3247	124.762	89.7913	114.64	83.216	131.972	91.2714	67.5407	122.584	150.018	127.033	74.9659	146.498	59.7854	131.016	73.3959	182.905	128.999	101.566
ENSCPOG00000000098	3842.68	4910.17	3778.66	3632.15	3618.43	3414.31	3012.59	4351.43	4814.09	3099.99	3324.49	4186.5	2640.96	3035.09	3029.6	2799.59	3905.77	3756.84	3679.84	3379.94	3119.6	3007.67	3652.51
ENSCPOG00000000100	0.907363	16.6024	0.87267	0	2.04894	1.66349	2.74871	0	0	6.28437	4.60967	6.14006	0	1.57913	0	6.46258	0.82767	2.89284	0	0	7.95237	4.96152	3.86918
ENSCPOG00000000101	2329.2	2084.64	1963.51	1902.55	1892.2	1802.39	2151.33	1867.56	2026.83	1875.44	2544.54	1740.71	1600.8	1809.69	1881.73	1964.62	1661.13	1979.67	2019.36	1689.35	1533.67	1901.25	2263.47
ENSCPOG00000000102	194.176	253.187	204.205	214.545	160.842	186.311	113.613	220.462	209.475	201.998	115.242	251.743	474.112	239.238	176.384	281.768	274.786	225.642	168.042	349.564	571.435	516.99	177.982
ENSCPOG00000000103	3.62945	0	0	6.61594	0	1.66349	2.74871	0	0	6.28437	0	7.1634	7.21082	9.47479	5.48344	0	3.31068	0	2.84817	0	0	3.96921	15.4767
ENSCPOG00000000106	342.983	261.488	294.962	230.613	272.509	255.345	375.657	271.413	376.863	241.499	499.688	278.349	789.585	210.025	227.563	854.353	210.228	265.177	306.653	1008.88	703.217	908.95	291.156
ENSCPOG00000000108	2146.82	1501.48	1573.42	1627.52	1866.59	1567.01	1847.14	1529.52	1685.36	1597.13	1476.01	1675.21	1606.21	1401.48	1510.69	1861.22	1451.73	1515.85	1865.55	1584.85	1182.63	1790.12	1724.69
ENSCPOG00000000114	13.6104	9.33886	0	12.2867	0	7.4857	3.66495	0	11.4781	3.59107	8.2974	0	0	0	3.65562	0	1.65534	38.5712	0	0	0	3.96921	0
ENSCPOG00000000119	0	2.0753	2.61801	0	0	4.15872	0	0	4.78253	0.897767	0	1.02334	0	0	0	0	0	0	0	0	3.40816	2.97691	2.90189
ENSCPOG00000000124	1149.63	1162.17	1411.98	1414.87	1452.7	1314.99	768.723	1468.77	1046.42	1338.57	721.874	1170.7	1918.08	1698.36	1630.41	1257.62	1772.87	1363.49	1178.19	1275.1	1585.93	1374.34	1245.88
ENSCPOG00000000126	105.254	672.398	299.326	280.705	223.335	234.552	39.3982	412.509	393.124	148.132	84.8178	429.804	479.52	328.459	371.046	355.442	353.415	205.392	306.653	337.124	473.734	328.452	386.918
ENSCPOG00000000127	2110.53	1864.66	1780.25	1922.4	1852.24	1699.25	2249.36	1792.11	2008.66	2090	2998.13	1705.91	1717.98	1713.36	1834.21	2000.81	1474.91	1593.96	1665.23	1486.58	1236.03	1763.32	2309.9
ENSCPOG00000000128	2260.24	2135.49	2089.17	1977.22	1806.14	1724.21	2334.57	1898.91	1890.05	1909.55	2854.3	1626.09	2132.6	1743.36	1972.21	2376.94	1536.98	1984.49	1708.9	2087.43	1933.56	2055.06	1974.25
ENSCPOG00000000131	88.0142	59.1461	66.3229	48.2018	88.1045	69.0348	52.2256	65.6487	52.6078	55.6616	63.6134	111.544	54.0812	70.2714	66.7151	41.3605	52.1432	57.8569	93.9897	43.54	74.9795	67.4766	98.6642
ENSCPOG00000000135	1817.45	2280.76	2367.55	1994.23	2558.1	2414.55	2354.73	1896.95	2272.66	2297.39	2196.04	2251.36	2238.96	2190.26	2126.66	2410.54	2411	2341.27	2383.92	2352.4	2316.41	2319.01	2287.65
ENSCPOG00000000136	215.952	348.651	406.664	413.023	332.953	382.602	257.463	306.687	310.864	425.542	388.134	269.139	526.39	473.74	412.172	365.782	399.764	345.213	328.489	293.584	451.013	253.037	370.474
ENSCPOG00000000137	2252.98	2606.58	2335.26	2109.54	2169.83	2100.99	2171.48	2369.23	2379.79	2180.68	2227.39	2537.89	1970.36	2352.91	2406.31	2548.84	2537.63	2192.77	2221.58	2643.5	2190.31	2357.71	2265.41
ENSCPOG00000000138	651.487	975.392	851.726	651.197	666.93	828.417	452.621	697.64	1238.67	683.201	437.918	762.391	657.987	814.042	798.754	608.775	859.949	747.318	704.448	686.687	823.638	682.705	640.35
ENSCPOG00000000139	89.829	64.3344	95.121	98.2939	96.3002	90.6601	120.943	99.9429	106.172	92.47	100.491	79.8208	41.4622	104.223	97.7879	78.8434	86.0776	102.214	114.876	64.6879	64.755	69.4612	110.272
ENSCPOG00000000140	3760.11	3030.98	4610.32	4500.73	4148.08	4636.14	4644.41	2706.3	3088.56	4733.03	3283	3936.8	3372.86	4739.76	3789.05	2700.06	3048.31	2943.95	5003.29	2617.37	2426.61	4306.6	3719.25
ENSCPOG00000000141	218.675	223.095	603.888	479.183	441.547	458.291	193.326	359.598	183.649	523.398	230.483	155.548	416.425	365.569	503.562	337.347	610.82	171.642	307.603	215.212	330.591	289.753	218.609
ENSCPOG00000000142	154.252	70.5603	20.0714	84.1169	13.3181	68.203	46.7281	110.721	30.6082	99.6522	10.1413	239.462	104.557	45.0053	66.7151	42.653	25.6578	38.5712	79.7489	32.344	140.871	26.7922	58.0378
ENSCPOG00000000143	163.325	131.782	124.792	170.124	162.891	212.927	148.431	148.934	161.649	182.247	100.491	187.272	106.36	154.755	180.039	205.51	173.811	159.106	178.486	135.596	128.374	139.915	133.487
ENSCPOG00000000144	271.302	243.848	256.565	229.667	239.726	306.082	229.976	221.442	221.909	219.953	204.669	209.785	95.5434	240.028	233.046	157.687	220.988	219.856	231.651	139.328	128.374	173.653	252.464
ENSCPOG00000000146	821.164	841.535	942.484	1223	978.369	1153.63	700.006	1014.13	759.465	956.122	515.361	1029.48	1103.26	1207.25	1235.6	573.877	1147.15	956.567	1097.5	816.063	1132.64	543.782	866.697
ENSCPOG00000000149	6010.37	9333.67	8300.84	10115.8	9735.54	11872.3	8928.74	10591	6944.23	9923.92	5369.34	9427.04	9523.69	13246.5	11141.4	7660.74	10775.4	10200.2	11327.2	10785.5	10636.9	7731.04	9103.22
ENSCPOG00000000150	0	0	2.61801	0	0	0	0	0	0.956505	0	0	0	3.60541	0.789566	0	0	2.48301	0	0	0	0	0	0
ENSCPOG00000000153	8511.97	7066.4	7820.87	7329.51	7312.67	6897.65	8027.16	8602.92	8471.77	8008.08	9325.35	6087.87	7672.31	7073.72	6842.41	9468.97	6534.45	6888.82	9423.66	10384.9	8932.78	8890.05	8043.07
ENSCPOG00000000154	0	0	0	0	0	0	0	14.6975	3.82602	5.3866	0	0	7.21082	0	16.4503	9.04761	6.62136	0	0	0	14.7687	0.992303	0
ENSCPOG00000000156	264.043	150.459	218.168	235.338	230.506	134.743	189.661	214.583	366.342	158.905	221.264	274.256	129.795	170.546	267.774	174.49	243.335	196.713	228.803	110.716	159.047	214.338	192.492
ENSCPOG00000000160	954.546	1303.29	1314.24	1428.1	1257.03	1560.35	1089.41	1242.43	1477.8	1384.36	1110.93	1679.31	1829.75	1684.93	1431.18	1240.81	1516.29	1608.42	1195.28	1516.43	1826.77	1344.57	1511.88
ENSCPOG00000000161	578.898	1049.07	829.037	918.67	757.084	721.954	861.263	798.563	715.466	799.911	1282.41	821.745	1041.96	765.879	837.138	908.638	720.9	791.675	734.829	855.871	954.284	811.704	836.711
ENSCPOG00000000162	1414.58	1329.23	1377.07	1327.91	1417.87	1720.88	1698.7	1453.09	1581.1	1163.51	1277.8	1379.47	1177.17	1484.38	1766.58	1401.09	1597.4	1190.89	1777.26	1518.92	1355.31	1176.87	1447.07
ENSCPOG00000000164	846.57	1176.7	1410.23	1141.72	1356.4	1002.25	1180.11	1355.11	1261.63	1150.94	1315.6	1217.78	1703.56	1372.27	1099.43	1353.26	1114.87	1149.42	915.213	1304.95	1325.77	1203.66	1223.63
ENSCPOG00000000165	117.05	130.744	45.3788	83.1718	110.643	85.6696	58.6392	97.9832	31.5647	48.4794	106.944	145.315	59.4893	48.1635	169.073	86.5985	96.8373	78.1068	130.067	165.452	164.728	66.4843	119.945
ENSCPOG00000000166	527.178	573.821	789.766	689.002	548.092	801.801	744.901	851.474	589.207	813.377	671.167	738.854	802.204	925.371	751.231	747.074	835.946	662.461	869.642	725.251	590.748	762.089	813.496
ENSCPOG00000000167	0.907363	0	0	1.89027	1.02447	0	0.916238	0.979832	0.956505	0.897767	0.921933	1.02334	1.80271	2.3687	0	2.58503	0	0	1.89878	2.488	9.08842	7.93843	0
ENSCPOG00000000168	2167.69	1485.92	2206.11	1958.32	2372.67	2353.84	2260.36	2332.98	1627.02	2312.65	1655.79	2120.37	1260.09	2161.83	2334.12	1685.44	2339.82	2083.81	2780.77	1587.34	1397.35	1593.64	2079.69
ENSCPOG00000000170	3272.86	3118.14	2854.5	2887.38	2775.29	2445.33	3303.04	2971.83	3232.03	2924.93	4344.15	2748.7	2956.44	2712.16	2894.34	3599.66	2619.57	3120.41	2657.35	3238.13	2733.34	3386.73	3341.04
ENSCPOG00000000173	3137.66	2848.35	2777.71	2683.23	2543.76	2508.54	3081.31	2648.49	3053.16	2601.73	4209.55	2653.53	2339.91	2681.37	2798.38	2621.22	2737.1	3031.7	2927.92	2627.33	2544.76	2589.91	2632.98
ENSCPOG00000000174	1087.02	1018.97	744.388	1249.47	1281.61	632.126	1159.04	1025.88	685.814	973.18	493.234	1354.91	1499.85	1786.79	955.946	1094.76	1088.39	1964.24	1446.87	1250.22	1353.04	1776.22	1390
ENSCPOG00000000176	11.7957	15.5648	16.5807	9.45134	31.7586	6.65395	14.6598	11.758	22.9561	10.7732	35.9554	32.747	12.6189	7.89566	11.8808	14.2177	7.44903	17.3571	11.3927	22.392	28.4013	8.93073	23.2151
ENSCPOG00000000179	2343.72	3094.28	4251.65	3894.9	3891.96	3964.92	3484.45	4037.89	3578.29	3860.4	3379.81	3265.49	4687.03	4730.29	3623.64	3224.83	3499.39	3497.45	3847.88	4268.16	3680.81	3507.79	3771.49
ENSCPOG00000000180	282.19	171.212	115.192	108.69	248.946	153.041	198.824	195.966	204.692	185.838	491.39	432.874	344.317	255.819	309.814	143.469	80.2839	272.891	159.498	360.76	245.387	206.399	150.898
ENSCPOG00000000183	26926.9	19019.1	28144.5	32559.9	28469	24702.8	27363.4	35855	29408.7	29641.6	28151.2	27402.1	31442.8	26242.8	28626.3	34490.8	33962.6	28947.7	33255.3	37728	36979.7	35085.9	29013.1
ENSCPOG00000000189	35.3872	37.3554	9.59937	17.0124	17.416	10.8127	8.24614	21.5563	20.0866	8.97767	82.974	9.21009	14.4216	6.31653	7.31125	9.04761	15.7257	34.7141	24.6842	6.21999	18.1768	17.8615	5.80378
ENSCPOG00000000193	1518.02	2313.96	1906.78	2217.28	1775.41	2348.01	2097.27	2654.36	1785.8	2019.08	1284.25	2517.43	3163.75	2203.68	2094.67	2679.38	2014.55	2658.52	1988.03	3212	2731.07	2708.99	2380.52
ENSCPOG00000000194	8.16627	18.6777	20.9441	20.7929	9.22023	23.2888	15.576	21.5563	18.1736	5.3866	4.60967	26.6069	7.21082	14.2122	22.8477	24.5578	22.3471	20.2499	13.2915	13.684	26.1292	13.8922	15.4767
ENSCPOG00000000195	48.0902	17.6401	9.59937	6.61594	6.14682	7.4857	25.6547	3.91933	47.8253	5.3866	20.2825	0	1.80271	15.0018	21.0198	9.04761	15.7257	36.6427	18.0384	9.95199	11.3605	2.97691	14.5094
ENSCPOG00000000196	0	25.9413	0	7.56107	0	0	0.916238	9.79832	4.78253	0	23.0483	0	21.6325	0	16.4503	1.29252	1.65534	0	0	3.732	23.8571	36.7152	13.5421
ENSCPOG00000000197	2820.08	2139.64	3805.71	2426.16	3155.37	2596.71	2460.1	3132.52	3149.77	3280.44	1962.8	2476.49	2305.66	2320.53	2524.21	2754.35	3065.69	1687.49	3791.87	2551.44	2451.6	2895.54	2668.77
ENSCPOG00000000198	2507.04	3387.93	2368.43	2735.22	2678.99	2996.77	2104.6	2581.86	2771.95	2170.8	1986.77	2956.44	3246.67	2440.55	2796.55	3317.89	2804.14	2456.02	2326.96	2720.63	2890.12	2930.27	2402.76
ENSCPOG00000000202	848.385	1021.05	637.922	652.142	684.346	689.516	844.771	787.785	729.814	755.022	1368.15	578.189	780.571	749.298	781.39	895.713	628.201	701.996	581.977	817.307	833.863	906.965	836.711
ENSCPOG00000000203	0	2.0753	0	0	2.04894	0	0	0	0	0	0	1.02334	0	0	0	0	0	0	0	1.244	0	0	0
ENSCPOG00000000204	781.24	1365.55	1822.14	1918.62	1877.85	2031.12	1443.99	1762.72	1319.02	1808.1	1250.14	1462.36	1932.5	2097.88	2064.51	1477.35	1644.58	1291.17	1928.21	1603.51	1752.93	1572.8	1626.99
ENSCPOG00000000207	445.515	514.675	418.882	480.128	465.11	558.1	448.04	583.98	659.989	416.564	195.45	725.551	313.671	533.747	599.522	343.809	607.509	439.712	497.481	347.076	424.884	401.883	640.35
ENSCPOG00000000208	362.945	226.208	149.227	247.625	186.454	230.393	176.834	139.136	200.866	209.18	131.836	239.462	194.692	223.447	182.781	213.265	204.434	233.356	178.486	204.016	198.809	192.507	198.296
ENSCPOG00000000209	1080.67	1159.06	1442.52	1802.37	1257.03	1878.08	1258.91	1833.27	1045.46	1566.6	1303.61	1782.66	1626.04	2119.2	1694.38	1561.36	1594.09	1953.63	1619.66	1683.13	1592.75	1314.8	1513.82
ENSCPOG00000000210	1909.09	1849.09	1780.25	2313.69	2147.29	1839.82	1979.99	2235	1784.84	2137.58	2747.36	1904.44	3084.43	2009.45	1948.45	2734.96	2068.35	2353.81	1978.53	2465.61	2731.07	2471.83	2127.08
ENSCPOG00000000211	15.4252	236.584	96.8664	154.057	68.6395	234.552	167.672	168.531	87.9985	140.949	51.6283	177.038	118.979	183.179	79.5098	169.32	143.187	119.571	86.3946	182.868	163.592	120.069	122.847
ENSCPOG00000000212	47.1829	3.11295	0	0	3.07341	5.82221	3.66495	0	15.3041	0	15.6729	0	0	0	0.913906	0	0	8.67853	7.59513	0	0	0	2.90189
ENSCPOG00000000213	2438.08	2337.83	3086.63	3373.18	2929.99	3237.98	2225.54	2916.96	2268.83	3133.21	1757.2	3442.53	2758.14	3453.56	3406.13	2073.19	3499.39	2643.09	3161.47	2418.33	2448.19	2587.93	2693.92
ENSCPOG00000000214	37.2019	17.6401	12.2174	20.7929	17.416	19.9619	14.6598	0.979832	18.1736	16.1598	11.0632	16.3735	3.60541	15.7913	23.7616	24.5578	14.8981	21.2142	32.2793	13.684	7.95237	1.98461	8.70566
ENSCPOG00000000215	305.781	761.636	488.695	831.718	706.885	710.31	547.91	774.067	604.511	570.98	909.948	809.465	933.801	779.302	971.482	723.809	842.568	639.318	715.841	761.327	829.319	711.482	679.042
ENSCPOG00000000216	605.211	389.119	737.406	825.102	949.684	921.573	783.383	717.237	677.206	1022.56	859.242	995.713	995.093	1081.71	991.588	712.176	985.754	666.318	894.327	801.135	803.189	1010.16	840.58
ENSCPOG00000000218	2419.03	2106.43	2227.93	2262.65	2259.98	2198.3	2351.07	2229.12	2258.31	2334.19	2265.19	2752.79	2727.49	2517.93	2371.59	2632.85	2218.98	2242.92	2304.17	2492.97	2609.51	2627.62	2486.92
ENSCPOG00000000219	1450.87	2610.73	2381.52	2984.73	1981.33	2369.64	1863.63	2604.39	2069.88	2080.13	2063.29	2568.59	3176.37	2885.86	2635.71	1916.8	3089.69	2165.77	2495.95	2444.46	2959.42	2229.71	2229.62
ENSCPOG00000000220	322.114	247.999	212.059	211.71	191.576	231.225	282.201	166.571	232.431	189.429	313.457	157.595	196.495	206.077	204.715	275.306	181.26	242.999	259.184	263.728	162.456	264.945	246.66
ENSCPOG00000000222	91.6437	143.196	92.503	103.02	101.423	108.127	65.9691	173.43	110.955	88.879	89.4275	76.7508	171.257	184.758	149.881	107.279	148.981	140.785	75.9513	95.7879	156.775	76.4074	101.566
ENSCPOG00000000224	1392.8	1345.83	1792.46	1392.18	1206.83	1365.72	1316.63	1307.1	1550.5	1352.04	838.037	1861.46	1011.32	1408.59	1581.06	947.414	1634.65	1498.49	1359.53	1214.14	1087.2	1140.16	1594.1
ENSCPOG00000000227	0	0	0	0	2.04894	0	1.83248	0	0.956505	1.79553	0	0	0	0	0	1.29252	0	0	0	8.70799	2.27211	0	0
ENSCPOG00000000230	1214.05	1517.05	1274.1	1159.68	1386.11	1287.54	1344.12	1239.49	1484.5	1249.69	1417.93	1230.06	950.026	1185.14	1321.51	1319.66	1266.33	1284.42	1175.35	1230.31	1321.23	1308.85	1318.42
ENSCPOG00000000232	32.6651	20.753	16.5807	29.2991	28.6852	30.7745	21.0735	6.85882	15.3041	18.8531	66.3792	29.677	23.4352	15.0018	19.192	52.9931	15.7257	27.9641	26.583	22.392	43.17	18.8538	12.5748
ENSCPOG00000000236	240.451	281.203	315.907	297.717	411.837	449.974	218.065	201.845	254.43	208.282	379.836	207.739	295.644	269.242	367.39	305.034	320.308	246.856	206.967	308.512	265.836	267.922	350.161
ENSCPOG00000000237	2879.06	3667.06	3111.94	3386.41	3529.3	3282.06	3362.59	3432.35	4005.84	3291.21	2944.65	2714.93	4867.3	3489.09	3632.78	4695.71	3688.1	3409.7	3428.25	4413.71	4176.13	4059.51	3431
ENSCPOG00000000244	30.8503	62.2591	36.6521	77.501	26.6362	74.0252	77.8802	31.3546	54.5208	42.1951	29.5019	107.451	79.319	79.7462	78.5959	89.1836	105.942	91.6067	67.4068	51.0039	78.3876	50.6075	53.2013
ENSCPOG00000000245	9.07363	2.0753	3.49068	2.8354	2.04894	4.15872	2.74871	4.89916	0	0	0	6.14006	5.40812	4.7374	7.31125	14.2177	4.13835	0	2.84817	1.244	3.40816	1.98461	2.90189
ENSCPOG00000000246	436.442	223.095	415.391	412.078	401.592	336.856	299.61	334.123	448.601	306.139	542.097	239.462	196.495	349.778	367.39	361.904	349.277	318.213	411.086	376.932	313.551	434.629	342.423
ENSCPOG00000000247	3.62945	0	0	0	0	0	0	0	0	0	0.921933	0	5.40812	0	0	0	0	0	0	0	0	0	1.93459
ENSCPOG00000000248	969.064	1339.61	1966.13	1503.71	1815.36	1891.39	1113.23	1560.87	1298.93	1589.05	1129.37	1409.14	2130.8	1792.31	2480.34	1229.18	1503.88	1740.53	1899.73	1247.73	2173.27	1289	1544.77
ENSCPOG00000000249	3061.44	2550.55	2692.19	2434.66	2507.9	2211.61	2648.84	2606.35	2626.56	2728.31	4416.06	2404.86	3066.4	2492.66	2619.25	3096.87	2645.23	2238.1	2717.16	2920.91	2572.02	3010.65	2869
ENSCPOG00000000250	2468.03	2710.34	2204.36	2114.26	2477.17	2506.05	2124.76	2522.09	2951.78	2225.56	1850.32	2584.97	2130.8	2270.79	2788.33	2153.33	2665.92	2267.02	2985.84	2385.99	2224.39	2192	2626.21
ENSCPOG00000000251	1430.91	1045.95	1284.57	1254.19	1365.62	1124.52	1739.02	1128.77	1308.5	1271.24	1806.99	1326.25	1516.08	1273.57	1178.94	1686.73	1209.23	1255.49	1403.2	1717.96	1460.96	1540.05	1456.75
ENSCPOG00000000253	4666.57	3759.41	3938.36	3927.03	3933.97	3901.71	4169.8	4005.55	3720.81	4206.04	5246.72	3580.68	4620.33	3842.03	3766.21	4628.5	3884.25	4447.26	4134.6	4594.09	4243.16	4075.39	3908.84
ENSCPOG00000000256	227.748	573.821	431.972	470.677	474.33	510.691	317.934	450.723	607.381	355.516	275.658	567.956	539.009	484.004	526.41	484.693	437.837	395.355	452.86	429.18	622.557	524.928	478.812
ENSCPOG00000000258	2356.42	2022.38	2744.55	2672.84	2698.46	3386.03	2710.23	3848.78	2621.78	3586.58	2570.35	2287.17	4011.02	2977.45	2998.53	3049.04	3105.42	3177.31	2535.82	3020.43	3661.5	3023.55	2620.4
ENSCPOG00000000259	134.29	314.408	273.146	207.929	269.436	278.634	224.478	233.2	245.822	272.921	47.0186	214.902	234.352	263.715	359.165	224.898	214.366	170.678	116.775	88.3239	222.666	378.068	190.557
ENSCPOG00000000260	127.938	109.991	92.503	99.239	87.08	75.6887	104.451	72.5076	78.4334	67.3325	246.156	70.6107	79.319	81.3253	83.1655	111.156	105.942	79.071	40.8238	87.0799	126.102	95.2611	114.141
ENSCPOG00000000262	0	0	0	5.6708	0	0	10.0786	4.89916	0	14.3643	93.1152	22.5136	3.60541	0	4.56953	0	0	81.9639	0	0	0	0	0
ENSCPOG00000000265	3440.72	3706.49	4932.33	4584.84	4177.79	4402.42	3402.91	4901.12	3732.28	4757.27	3789.14	4041.18	4687.03	4765.03	4801.66	3774.14	4708.61	4449.19	4333.97	4084.05	4162.5	3938.45	4791.98
ENSCPOG00000000267	8182.6	1121.7	962.555	254.241	128096	4566.28	5185.91	7659.35	24492.3	28394.6	6007.32	1064.28	2046.07	459.527	698.224	3316.59	67668.6	280536	67912.8	376.932	5155.41	72.4381	900.553
ENSCPOG00000000268	0	0	0.87267	0.945134	5.12235	0	3.66495	0.979832	0	3.59107	0	8.18675	0	0.789566	2.74172	0	0.82767	0	1.89878	0	2.27211	0	8.70566
ENSCPOG00000000269	40.8313	30.0919	6.10869	0	5.12235	3.32698	26.5709	7.83866	13.3911	11.671	6.45353	6.14006	19.8298	6.31653	21.9337	14.2177	19.8641	60.7497	5.69635	8.70799	7.95237	9.92303	24.1824
ENSCPOG00000000270	156.974	70.5603	129.155	100.184	48.1501	57.3903	76.964	79.3664	82.2595	79.0035	121.695	37.8637	102.754	81.3253	47.5231	31.0204	54.6262	68.4639	55.0647	54.7359	53.3945	66.4843	69.6453
ENSCPOG00000000272	1033.49	1360.36	1229.59	1586.88	1598.17	1690.94	806.289	1217.93	958.418	1390.64	665.636	1776.52	1975.77	1609.14	1537.19	1243.4	1748.87	1573.71	1341.49	1415.67	2110.79	1483.49	1223.63
ENSCPOG00000000278	605.211	654.758	383.975	492.415	394.421	371.79	651.445	582.02	569.121	394.12	541.175	210.809	264.998	369.517	586.728	439.455	710.141	370.284	503.177	343.344	310.142	486.229	440.12
ENSCPOG00000000279	52.6271	159.798	102.975	110.581	28.6852	39.9237	108.116	128.358	115.737	32.3196	106.944	114.614	205.508	140.543	78.5959	40.068	30.6238	92.571	7.59513	55.9799	146.551	121.061	72.5472
ENSCPOG00000000280	2233.93	2504.89	2193.89	2105.76	2387.02	2643.28	2148.58	2277.13	2240.14	1978.68	1225.25	2881.74	2579.67	2543.19	2435.56	2141.7	2202.43	2138.77	2090.56	2104.85	2474.32	2383.51	2313.77
ENSCPOG00000000281	1.81473	23.866	7.85403	11.3416	19.4649	18.2984	1.83248	9.79832	7.65204	3.59107	1.84387	24.5602	23.4352	8.68523	13.7086	9.04761	6.62136	9.64281	0	12.44	35.2176	31.7537	13.5421
ENSCPOG00000000282	1938.13	2335.75	1935.58	2187.04	2146.27	2140.08	2248.45	1724.5	2144.48	1965.21	2072.51	1941.28	2275.01	2236.05	2130.32	2281.29	2036.07	1847.56	2126.64	1981.69	2067.62	2936.23	1895.9
ENSCPOG00000000283	3042.39	2747.7	3481.95	3051.84	3555.94	3243.8	3362.59	3488.2	3382.2	3880.15	4200.33	3141.66	4521.19	3653.32	3228.83	3956.39	3715.41	3622.8	3382.68	4218.4	4217.03	4639.02	3896.27
ENSCPOG00000000284	235.007	294.693	322.888	248.57	244.848	287.783	256.547	298.849	343.385	321.401	341.115	281.419	290.236	313.458	322.609	259.796	284.718	224.677	271.526	240.092	347.632	253.037	283.418
ENSCPOG00000000285	0	0	0	0	0	0	4.58119	0	0	0	0.921933	0	0	0	0	0	0	8.67853	0	0	2.27211	0	1.93459
ENSCPOG00000000287	25.4062	64.3344	16.5807	27.4089	47.1256	29.111	15.576	26.4555	22.9561	21.5464	7.37546	26.6069	46.8703	11.0539	18.2781	23.2653	28.1408	30.857	28.4817	24.88	29.5374	47.6306	18.3786
ENSCPOG00000000288	0	0	0	0	0	0	0	6.85882	16.2606	0	24.8922	1.02334	0	0	0	0	0	0.964281	0	0	0	0	0
ENSCPOG00000000291	0	92.3509	7.85403	96.4036	63.5172	55.7269	101.702	112.681	63.1293	49.3772	145.665	32.747	55.8839	18.9496	48.437	40.068	30.6238	8.67853	45.5708	85.8359	65.8911	79.3843	48.3648
ENSCPOG00000000293	2661.3	1346.87	2331.77	1267.42	3180.98	2160.87	2128.42	2170.33	1499.8	1931.1	2827.57	1439.84	1312.37	1868.9	2098.33	2763.4	1107.42	1936.28	3255.46	3121.19	1273.52	1265.19	1263.29
ENSCPOG00000000294	350.242	225.17	636.176	449.884	404.666	307.745	172.253	671.185	744.161	400.404	387.212	419.571	311.868	297.666	326.264	368.367	408.041	328.82	698.752	614.535	657.775	319.522	278.581
ENSCPOG00000000296	2718.46	3067.3	3001.98	2949.76	2616.5	2506.88	2432.61	2526.99	2265	2956.35	3625.96	1882.95	3704.56	2806.91	3167.6	3056.8	2300.09	3058.7	2984.89	3218.22	3150.27	2715.93	2918.33
ENSCPOG00000000297	6.35154	6.22591	0	1.89027	0	3.32698	0	0	1.91301	0	0	0	0	2.3687	5.48344	18.0952	4.96602	0	0	2.488	4.54421	0	1.93459
ENSCPOG00000000298	4508.69	2835.9	4069.26	4426.06	3974.95	3640.54	4366.79	5377.32	4233.49	4131.52	6967.05	3458.9	5195.4	3022.46	3556.92	4987.82	3568.91	3683.55	3741.55	5259.63	4301.1	4446.51	4055.87
ENSCPOG00000000299	0	11.4142	0	0	0	0	0	16.6571	0	0	1.84387	0	0	2.3687	1.82781	0	0	6.74997	0	6.21999	2.27211	0	0
ENSCPOG00000000301	141.549	245.923	149.227	167.289	162.891	180.488	194.242	179.309	178.866	148.132	221.264	186.249	140.611	191.075	195.576	214.558	193.675	188.035	190.828	194.064	122.694	175.638	213.772
ENSCPOG00000000303	13.6104	1.03765	0	0	0	0	0	0	6.69554	0	10.1413	0	0	0	0	0	0	4.8214	0	0	0	0	0
ENSCPOG00000000304	886.494	789.653	808.092	688.057	687.42	697.833	825.53	618.274	772.856	614.971	882.29	631.403	627.341	744.561	670.807	708.298	730.005	721.282	687.359	728.983	711.169	807.735	684.846
ENSCPOG00000000307	12.7031	0	0	0	0	5.82221	9.16238	0	0	0	0	0	5.40812	3.94783	0.913906	0	0	0	0	0	0	0	0
ENSCPOG00000000308	0.907363	8.30121	1.74534	4.72567	2.04894	1.66349	2.74871	4.89916	4.78253	2.6933	18.4387	5.11672	7.21082	3.94783	0.913906	0	0	11.5714	0.949391	18.66	2.27211	2.97691	9.67296
ENSCPOG00000000309	7919.47	5642.75	7089.57	6147.15	7321.89	6162.39	6748.09	6556.06	6544.41	6775.45	7287.88	6315.05	6158.04	6446.02	6321.49	7159.24	5988.19	6327.61	6884.98	6925.34	5876.8	7464.11	6578.58
ENSCPOG00000000315	3795.5	2940.7	3316.15	2937.48	3667.6	3020.06	3398.33	2697.48	3505.59	3212.21	3183.43	3075.15	2805.01	3021.67	3061.59	3535.03	3150.94	3111.73	3522.24	3243.1	2674.27	3186.29	3068.26
ENSCPOG00000000319	440.071	566.558	597.779	841.169	822.65	813.446	900.662	817.18	675.293	810.684	695.138	663.127	775.163	956.164	711.019	465.306	690.276	759.853	689.258	701.615	799.781	574.544	875.403
ENSCPOG00000000320	1067.97	2266.23	1445.14	1606.73	1001.93	1781.6	1140.72	1446.23	1903.45	1079.12	1035.33	2211.45	1110.47	1518.34	1355.32	1093.47	1388	1274.78	1530.42	1072.33	1340.54	1200.69	1131.74
ENSCPOG00000000322	8.16627	10.3765	6.10869	4.72567	6.14682	7.4857	9.16238	10.7782	6.69554	7.18214	17.5167	11.2568	0	5.52696	2.74172	2.58503	4.96602	14.4642	4.74696	1.244	3.40816	0	9.67296
ENSCPOG00000000327	0	2.0753	16.5807	17.0124	10.2447	9.98093	30.2358	0	15.3041	4.48884	11.9851	32.747	14.4216	14.2122	15.5364	27.1428	10.7597	0	0	6.21999	0	5.95382	14.5094
ENSCPOG00000000328	11.7957	11.4142	0	0	4.09788	1.66349	2.74871	0	12.4346	0	7.37546	0	0	0	0	0	2.48301	39.5355	13.2915	0	1.13605	0.992303	0.967296
ENSCPOG00000000333	4130.32	4261.63	2956.61	2859.97	3170.74	2901.96	3434.98	3229.53	4885.83	2706.77	4004.88	4134.31	3217.83	2932.45	2827.63	4212.31	3230.39	3507.09	3231.73	3914.86	3753.52	4050.58	3344.91
ENSCPOG00000000335	1.81473	0	20.9441	6.61594	0	1.66349	0	3.91933	0	0	30.4238	31.7236	0	3.94783	8.22515	1.29252	17.3811	0	0	1.244	0	0	0
ENSCPOG00000000337	1096.09	1448.56	1274.97	1400.69	1240.63	1127.85	1476.06	1409.98	1447.19	1387.95	1935.14	1242.34	1674.71	1351.74	1152.44	1580.75	1417.8	1348.06	1292.12	1619.69	1587.07	1832.78	1530.26
ENSCPOG00000000338	249.525	375.63	221.658	186.191	178.258	229.561	158.509	197.926	228.605	112.221	351.256	182.155	212.719	221.078	242.185	274.013	178.777	364.498	147.156	157.988	231.755	171.668	129.618
ENSCPOG00000000339	895.567	971.241	1007.93	1089.74	867.727	1163.61	940.976	932.8	795.812	983.953	890.587	1119.54	1231.25	1073.81	982.449	983.604	1023.83	900.638	862.047	821.039	1207.62	951.619	1048.55
ENSCPOG00000000341	5.44418	3.11295	0	0	2.04894	0	0	0	0	1.79553	9.21933	2.04669	0	3.94783	3.65562	2.58503	1.65534	0.964281	1.89878	0	0	0	0.967296
ENSCPOG00000000342	31.7577	43.5813	13.0901	31.1894	0	25.7841	11.9111	32.3345	23.9126	28.7285	32.2677	68.564	64.8974	55.2696	51.1787	37.4829	11.5874	57.8569	6.64574	18.66	40.8979	23.8153	45.4629
ENSCPOG00000000343	489.069	763.711	778.422	693.728	570.63	650.424	686.262	608.476	674.336	711.929	741.234	658.01	872.509	710.609	721.986	657.89	819.393	630.64	585.774	685.443	721.394	528.898	619.069
ENSCPOG00000000345	256.784	561.369	579.453	497.14	320.659	511.523	379.322	629.052	311.821	466.839	362.32	546.465	425.438	423.207	473.403	298.571	480.876	403.069	351.275	449.084	401.027	451.498	371.442
ENSCPOG00000000346	17114.7	15330.3	20941.5	22310.8	20342.9	29426.3	23494.2	25195.4	15598.7	21568.9	15170.4	24509.1	22546.4	32578.3	33368.5	13773	27662.4	21336.6	29019.1	23423.3	24827.3	15163.4	24844
ENSCPOG00000000348	94.3658	87.1627	15.7081	85.062	10.2447	4.15872	66.8854	53.8908	93.7375	33.2174	189.918	55.2605	25.2379	9.47479	23.7616	42.653	8.2767	127.285	12.3421	29.856	14.7687	17.8615	17.4113
ENSCPOG00000000349	29.943	9.33886	24.4348	16.0673	8.19576	23.2888	8.24614	8.81849	15.3041	10.7732	25.8141	48.0971	25.2379	18.9496	10.9669	12.9252	11.5874	6.74997	10.4433	12.44	2.27211	17.8615	27.0843
ENSCPOG00000000350	15.4252	29.0542	12.2174	7.56107	13.3181	24.1206	11.9111	12.7378	24.8691	13.4665	22.1264	10.2334	5.40812	15.7913	12.7947	31.0204	7.44903	8.67853	17.089	17.416	11.3605	31.7537	10.6403
ENSCPOG00000000352	1004.45	1177.73	1591.75	1467.79	1568.46	1540.39	1118.73	1547.15	1322.85	1747.95	1419.78	1089.86	1815.32	1629.66	1678.85	1337.75	1566.78	1608.42	1406.05	1317.39	1423.47	1278.09	1351.31
ENSCPOG00000000354	206.879	182.627	185.879	156.892	157.768	319.39	328.013	291.99	99.4766	193.918	154.885	157.595	198.298	204.498	149.881	195.17	249.956	182.249	168.992	220.188	182.905	218.307	237.955
ENSCPOG00000000355	1583.35	1597.98	1793.34	1421.48	1639.15	1525.42	1595.17	1598.11	1909.18	1534.28	1490.77	1673.17	1424.14	1764.68	1611.22	1300.27	1868.05	1395.31	1703.21	1578.63	1509.81	1460.67	1613.45
ENSCPOG00000000357	21.7767	18.6777	15.7081	16.0673	16.3915	18.2984	30.2358	27.4353	25.8256	17.0576	17.5167	15.3502	9.01353	13.4226	13.7086	15.5102	12.415	19.2856	14.2409	1.244	4.54421	5.95382	17.4113
ENSCPOG00000000358	1653.22	1630.15	1485.28	1458.34	1093.11	1389.84	1411.92	1531.48	1553.36	1525.31	1512.89	1451.1	1537.71	1446.48	1360.81	1414.01	1734.8	1373.14	1574.09	1435.57	1417.79	1354.49	1452.88
ENSCPOG00000000359	793.943	457.604	644.03	745.71	695.615	715.3	873.175	706.459	567.208	835.821	998.453	965.013	703.055	820.359	660.754	728.979	806.978	708.746	687.359	568.507	497.591	896.05	764.164
ENSCPOG00000000361	3606.77	5003.55	3085.76	2463.96	2885.93	3501.64	2867.82	2480.93	3646.2	2096.29	3179.75	4601.98	1835.15	2845.6	2807.52	2543.67	2920.02	2959.38	3051.34	2509.15	2352.77	2673.27	2922.2
ENSCPOG00000000363	2.72209	40.4684	35.7795	42.531	3.07341	19.1301	25.6547	24.4958	19.1301	20.6486	19.3606	0	19.8298	14.2122	14.6225	37.4829	18.2087	17.3571	11.3927	14.928	40.8979	16.8692	39.6591
ENSCPOG00000000367	787.591	1284.61	1122.25	1455.51	1354.35	2080.19	1050.92	1240.47	835.029	1185.05	828.818	1644.51	1130.3	1688.09	1569.18	873.74	1543.6	1240.07	1436.43	1134.53	1497.32	986.35	1270.06
ENSCPOG00000000368	566.195	690.038	399.683	592.599	614.682	647.097	492.936	637.871	525.121	565.593	457.279	660.057	794.993	587.437	711.019	750.951	610.82	588.211	694.005	725.251	850.904	773.997	561.999
ENSCPOG00000000371	0.907363	6.22591	0	0	0	0	1.83248	0	0	0	14.7509	0	0	0	2.74172	0	0	9.64281	0	0	1.13605	0	0
ENSCPOG00000000372	0	0	0.87267	0	0	5.82221	0	11.758	0	0	12.9071	0	0	0	0	0	1.65534	0.964281	0	0	0	2.97691	0
ENSCPOG00000000374	360.223	493.922	504.403	591.654	411.837	573.072	492.936	586.919	460.079	540.456	488.625	411.384	719.279	642.707	694.569	548.027	727.522	539.997	506.975	511.283	727.074	506.075	523.307
ENSCPOG00000000375	14.5178	0	1.74534	3.78053	4.09788	19.9619	4.58119	52.9109	16.2606	10.7732	9.21933	48.0971	10.8162	11.0539	4.56953	7.75509	11.5874	7.71425	1.89878	18.66	20.449	23.8153	14.5094
ENSCPOG00000000376	33.5724	98.5769	94.2484	99.239	99.3736	91.4919	28.4034	102.882	65.0424	53.866	59.0037	53.2139	111.768	97.1166	116.066	77.5509	117.529	71.3568	33.2287	73.3959	103.381	87.3227	78.351
ENSCPOG00000000379	30.8503	228.283	152.717	285.43	239.726	273.644	172.253	261.615	213.301	219.055	196.372	228.206	281.222	292.139	216.596	193.877	254.095	196.713	93.0403	276.168	284.013	209.376	162.506
ENSCPOG00000000380	13.6104	13.4895	0	0	3.07341	2.49523	3.66495	0	8.60855	1.79553	1.84387	0	0	0	0	2.58503	9.10437	8.67853	4.74696	2.488	6.81632	1.98461	7.73837
ENSCPOG00000000382	58.9786	66.4097	132.646	61.4337	87.08	70.6983	79.7127	102.882	46.8688	64.6392	83.8959	97.2176	86.5299	100.275	89.5628	74.9659	86.0776	100.285	82.597	99.5199	84.0679	97.2457	70.6126
ENSCPOG00000000386	6.35154	4.1506	4.36335	8.5062	5.12235	3.32698	10.0786	20.5765	10.5216	12.5687	9.21933	23.5369	10.8162	7.10609	9.13906	6.46258	4.96602	3.85712	0.949391	9.95199	6.81632	5.95382	8.70566
ENSCPOG00000000387	511.753	415.06	360.413	344.974	361.638	390.088	421.469	333.143	411.297	379.756	347.569	333.61	192.889	360.042	340.887	307.619	283.891	331.713	397.795	277.412	260.156	340.36	319.208
ENSCPOG00000000388	344.798	438.926	370.012	380.889	438.473	435.002	383.904	368.417	353.907	364.493	283.033	481.995	416.425	501.374	455.125	412.312	451.08	366.427	391.149	384.396	395.346	478.29	388.853
ENSCPOG00000000389	63.5154	239.697	51.4875	137.99	95.2758	148.05	72.3828	93.084	109.998	148.132	41.487	113.591	113.57	168.967	155.364	116.326	165.534	117.642	155.7	123.156	118.15	104.192	99.6315
ENSCPOG00000000390	1.81473	8.30121	1.74534	8.5062	6.14682	15.8031	5.49743	2.9395	10.5216	2.6933	0	3.07003	18.0271	13.4226	10.9669	12.9252	8.2767	6.74997	6.64574	7.46399	9.08842	13.8922	6.77107
ENSCPOG00000000391	67.1449	20.753	21.8168	29.2991	4.09788	13.3079	23.8222	20.5765	20.0866	35.9107	79.2862	60.3773	7.21082	67.1131	64.8873	28.4353	20.6917	24.107	24.6842	12.44	45.4421	12.8999	31.9208
ENSCPOG00000000392	1207.7	1868.81	1516.7	1714.47	1459.87	1705.91	1236	1478.57	1312.33	1922.12	973.561	1571.86	2165.05	2184.73	2009.68	1220.13	1636.3	1877.45	1707.01	1615.95	1981.28	1386.25	1775.96
ENSCPOG00000000393	16.3325	2.0753	0.87267	2.8354	6.14682	4.15872	0	0.979832	0	8.0799	0	1.02334	9.01353	1.57913	6.39734	0	3.31068	11.5714	0.949391	3.732	3.40816	5.95382	1.93459
ENSCPOG00000000395	2101.45	2749.78	1766.28	2695.52	2923.84	2679.88	2351.98	2205.6	1783.88	2123.22	1851.24	2450.91	2219.13	2272.37	2247.29	2239.93	2252.09	1738.6	1881.69	1984.18	2411.84	2555.18	2002.3
ENSCPOG00000000396	1932.68	1573.08	1619.68	1338.31	1279.56	1097.9	1578.68	1395.28	1734.14	1130.29	2290.08	1160.47	1119.48	1080.13	1305.06	1699.66	1279.58	1507.17	1233.26	1341.03	1056.53	1447.77	1361.95
ENSCPOG00000000397	0	0	0	0	8.19576	0	0	2.9395	0	0	0	0	0	0	3.65562	1.29252	0	0	0	0	0	0	0
ENSCPOG00000000398	259.506	224.133	179.77	101.129	104.496	147.219	143.849	99.9429	153.041	140.949	203.747	52.1905	118.979	105.012	100.53	157.687	133.255	205.392	157.599	148.036	159.047	144.876	100.599
ENSCPOG00000000399	257.691	231.396	398.81	294.882	399.543	313.568	373.825	296.889	298.43	268.432	355.866	309.05	284.827	346.619	300.675	352.857	321.136	280.606	398.744	404.3	369.217	417.76	328.881
ENSCPOG00000000400	65.3301	41.506	33.1615	2.8354	20.4894	13.3079	41.2307	10.7782	49.7383	18.8531	19.3606	15.3502	12.6189	7.89566	8.22515	29.7279	22.3471	111.857	42.7226	16.172	29.5374	12.8999	19.3459
ENSCPOG00000000401	14016.9	10804	5751.77	1159.68	2337.84	1476.35	3992.96	2508.37	6238.33	2292	6483.03	2211.45	2779.77	1282.26	1549.07	4824.96	3714.58	10013.1	1481.05	2242.93	2310.73	2410.3	2620.4
ENSCPOG00000000402	145.178	101.69	87.267	35.9151	111.667	99.8093	164.007	135.217	132.954	140.949	200.981	105.404	45.0676	66.3235	75.8542	84.0135	97.665	119.571	150.004	128.132	89.7482	113.123	137.356
ENSCPOG00000000403	8207.1	8272.15	10494.7	12172.4	10225.2	13372	9922.85	12726.1	7847.17	11238.2	6604.73	10105.5	9898.66	13518.2	13959.9	8442.71	13137.6	10610	10887.6	10740.7	11471.9	8358.17	11787.5
ENSCPOG00000000404	266.765	144.234	309.798	312.839	289.925	311.904	256.547	293.95	195.127	265.739	299.628	206.715	259.59	320.564	331.748	219.728	355.898	261.32	355.072	286.12	332.863	392.952	354.03
ENSCPOG00000000406	1912.72	3564.33	2810.87	2911.96	2831.64	3599.79	2413.37	2830.73	1893.88	2796.54	1553.46	3461.97	3118.68	4022.84	3004.92	2206.32	3019.34	2754.95	3092.17	2797.75	3192.31	2311.07	2846.75
ENSCPOG00000000409	1389.17	1189.15	709.481	713.576	1135.11	1084.59	984.956	1094.47	1231.02	987.544	1196.67	807.418	1397.1	846.415	773.165	1323.54	746.558	865.924	1038.63	920.559	814.55	1350.52	1008.89
ENSCPOG00000000410	3994.21	6430.32	3295.2	3466.75	3938.06	4101.33	2911.8	4100.6	4872.44	3113.46	3125.35	4807.67	3946.12	3823.87	3617.24	4447.55	4174.77	3347.98	4082.38	3697.16	3813.73	4807.71	3124.37
ENSCPOG00000000411	6239.03	3777.05	6908.93	5748.3	5882.51	5619.26	5024.65	5514.49	5352.6	6019.53	3819.57	5886.27	5970.56	6265.21	5982.43	5637.95	6993.81	5742.29	7196.39	6527.26	5393.98	5404.08	5655.78
ENSCPOG00000000412	876.513	1264.9	764.459	1105.81	1006.03	942.366	742.153	1011.19	965.114	756.818	792.862	1232.11	825.639	1060.39	997.985	975.849	1062.73	931.495	1164.9	971.563	952.012	986.35	922.8
ENSCPOG00000000413	42.6461	8.30121	20.0714	20.7929	15.3671	17.4666	46.7281	27.4353	33.4777	20.6486	5.5316	67.5407	10.8162	23.687	30.1589	16.8027	18.2087	10.6071	33.2287	44.784	40.8979	15.8769	19.3459
ENSCPOG00000000414	3761.02	3545.65	1715.67	1653.04	2840.86	4371.65	2540.73	3207.97	4657.22	2202.22	2100.16	3842.65	3307.96	2329.22	1637.72	3082.65	2909.26	2656.59	3144.38	1892.12	3129.83	3911.66	2702.62
ENSCPOG00000000415	6173.7	4114.29	4589.37	4848.54	4366.29	3200.55	7116.42	5063.77	6513.8	5146.9	10774.6	3877.45	4378.77	2967.19	3477.41	5273.46	3030.93	6007.47	3195.65	3989.5	3455.87	3863.04	4723.31
ENSCPOG00000000417	1649.59	1356.21	1271.48	1292.94	1209.9	850.874	1487.05	1216.95	2214.31	1230.84	2573.12	859.609	1312.37	840.888	965.085	1600.13	957.614	1855.28	1106.04	1146.97	972.461	1132.22	1384.2
ENSCPOG00000000418	2037.94	1919.65	2163.35	1702.19	2234.37	2238.22	2115.59	2120.36	1866.14	1917.63	1869.68	1757.08	2228.14	2037.87	1906.41	2268.36	2035.24	1940.13	2193.09	2419.58	2050.58	2577.01	2098.06
ENSCPOG00000000423	2317.41	2037.95	2155.49	2625.58	2739.43	2199.96	2749.63	1950.85	2018.23	1949.95	2811.9	2345.5	3535.11	2588.2	1735.51	1974.96	1968.2	3077.02	1800.05	2292.69	1943.79	3540.54	2798.39
ENSCPOG00000000424	1270.31	1341.68	1277.59	1888.38	1141.26	1529.58	1705.12	1053.32	1144.94	1896.98	1120.15	1667.03	921.182	1966.81	1724.54	806.53	1437.66	963.317	2047.84	1093.47	945.196	946.657	1173.33
ENSCPOG00000000425	861.088	534.39	466.878	316.62	380.079	507.364	437.045	343.921	491.644	331.276	314.379	559.769	376.765	276.348	293.364	465.306	272.303	452.248	367.414	408.032	366.945	502.106	418.839
ENSCPOG00000000426	36.2945	0	1.74534	1.89027	0	0	0	0	0	5.3866	21.2045	0	3.60541	0	0	5.17006	0	5.78569	0.949391	0	0	0	0
ENSCPOG00000000428	401.962	526.089	503.531	451.774	474.33	472.431	360.998	445.824	466.775	392.324	538.409	520.882	490.336	426.366	482.542	616.53	464.323	548.676	462.354	460.28	429.428	386.998	460.433
ENSCPOG00000000429	3132.22	2782.98	2521.14	2778.69	2020.26	1819.02	3260.89	2072.34	2677.26	2657.39	5109.35	2314.8	2042.47	1807.32	2208.91	2335.58	1634.65	2220.74	1784.86	1639.59	1662.05	2022.31	2959.93
ENSCPOG00000000430	3902.57	2587.9	2576.12	2423.32	2451.56	2377.12	2930.13	2451.54	2840.82	2557.74	3074.65	2621.81	1716.18	2481.61	2471.2	2575.98	2366.31	2547.63	2614.62	2413.36	1813.14	2225.74	2675.54
ENSCPOG00000000431	3701.13	3331.9	4025.63	3668.06	3903.23	4016.49	3574.24	3637.14	3128.73	4045.34	3129.96	4217.2	3974.97	4114.43	3354.95	3557	3663.27	3504.2	3647.56	3938.5	3906.89	3940.44	3920.45
ENSCPOG00000000432	23.5914	19.7154	0	0.945134	4.09788	2.49523	3.66495	0	0	6.28437	20.2825	0	0	1.57913	0	5.17006	0	54.964	0.949391	0	0	0	0
ENSCPOG00000000433	19.0546	178.476	32.2888	30.2443	29.7096	9.14919	37.5657	41.1529	33.4777	16.1598	59.9256	36.8404	41.4622	30.0035	25.5894	16.8027	26.4854	58.8211	0.949391	13.684	22.7211	69.4612	43.5283
ENSCPOG00000000435	796.665	425.437	786.276	577.477	488.672	250.355	297.777	637.871	325.212	325.889	668.401	594.563	362.344	409.785	626.026	113.741	442.803	290.249	369.313	325.928	364.673	366.16	431.414
ENSCPOG00000000436	9754.15	8257.63	21130	10894.6	10530.5	10524.1	10704.4	10546.9	11791.8	12997.9	6810.32	8193.91	5152.13	6941.07	10492.6	7713.73	10238.3	8366.1	13608.6	8546.27	6292.6	6303.11	8747.26
ENSCPOG00000000438	5127.51	3097.39	3995.96	3307.97	4907.21	4271.01	3226.99	3449.01	2870.47	4167.44	3118.9	4185.47	4553.63	4213.12	3316.57	3650.06	3820.52	4034.55	3417.81	3465.78	2577.7	3225.98	3168.86
ENSCPOG00000000440	15.4252	10.3765	9.59937	16.0673	18.4405	8.31744	27.4871	18.6168	17.2171	9.87544	14.7509	22.5136	7.21082	14.2122	7.31125	15.5102	18.2087	9.64281	15.1903	18.66	15.9047	14.8846	26.117
ENSCPOG00000000441	0	13.4895	13.9627	0	0	5.82221	10.9949	3.91933	6.69554	4.48884	0	1.02334	3.60541	0	3.65562	0	6.62136	0	1.89878	0	3.40816	1.98461	0.967296
ENSCPOG00000000442	585.249	559.294	747.878	975.378	589.071	905.769	641.366	926.921	628.424	800.808	642.587	725.551	1155.53	484.793	744.833	995.237	475.91	891.96	492.734	592.143	648.686	824.604	1005.02
ENSCPOG00000000445	272.209	340.35	571.599	660.648	575.752	627.135	396.731	659.427	431.384	730.782	411.182	470.738	733.701	748.509	721.072	435.578	746.558	463.819	750.019	624.487	704.353	468.367	570.705
ENSCPOG00000000446	0	0	0	5.6708	7.17129	0	6.41366	9.79832	0.956505	9.87544	0.921933	0	9.01353	0	0	0	0	0	0	1.244	0	0	0
ENSCPOG00000000447	41.7387	142.158	172.789	145.551	182.356	170.508	172.253	166.571	234.344	125.687	221.264	206.715	223.535	193.444	224.821	333.469	174.638	107.035	80.6983	185.356	230.619	206.399	183.786
ENSCPOG00000000449	1242.18	1176.7	1460.85	1137	1357.42	1191.89	1470.56	1120.93	1142.07	1423.86	1474.17	1353.88	1337.61	1282.26	1113.14	1248.57	1072.66	1187.99	1273.13	1293.76	1072.43	1420.98	1283.6
ENSCPOG00000000450	4411.6	3725.17	3745.5	3358.06	3498.57	4083.86	4410.77	3716.5	3946.54	4101	4239.97	4340	4130	4029.94	3929.8	4442.38	3213.01	3983.44	4387.14	4611.5	3516.08	4744.2	4075.22
ENSCPOG00000000452	19.0546	28.0166	24.4348	13.2319	17.416	18.2984	12.8273	14.6975	17.2171	22.4442	22.1264	20.4669	16.2243	11.0539	13.7086	27.1428	19.0364	24.107	25.6336	16.172	18.1768	35.7229	18.3786
ENSCPOG00000000453	601.582	1063.59	642.285	741.93	672.053	565.586	676.183	696.661	826.421	649.983	888.743	823.792	800.401	731.928	735.694	665.645	715.934	652.818	621.851	751.375	721.394	664.843	629.71
ENSCPOG00000000458	2845.49	5578.41	2429.51	4769.14	3579.5	3891.73	3078.56	3034.54	3508.46	2660.08	3046.99	3627.75	4443.67	4441.31	4538.46	3704.35	4164.01	4038.41	3564.96	3275.45	4262.47	3105.91	3640.9
ENSCPOG00000000461	235.007	252.149	278.382	147.441	175.184	128.089	143.849	222.422	147.302	164.291	247.078	239.462	90.1353	131.068	175.47	165.442	146.498	233.356	179.435	207.748	122.694	157.776	184.754
ENSCPOG00000000462	3336.37	2734.21	3609.36	3208.73	4383.71	3827.69	3477.12	3335.35	2503.17	4448.44	4339.54	2951.32	9630.05	3892.56	3461.88	7095.91	3282.54	3254.45	3755.79	6747.45	6770.88	9497.34	3362.32
ENSCPOG00000000465	134.29	207.53	261.801	319.455	256.118	197.955	195.159	219.482	197.997	216.362	171.48	149.408	272.209	285.823	226.649	192.585	269.82	234.32	277.222	269.948	246.523	165.715	164.44
ENSCPOG00000000466	7.25891	41.506	2.61801	72.7753	13.3181	42.419	0	0.979832	42.0862	17.9553	137.368	38.8871	12.6189	87.6418	44.7814	60.7482	28.1408	8.67853	6.64574	12.44	30.6734	61.5228	12.5748
ENSCPOG00000000467	1334.73	1289.8	1184.21	1242.85	1050.08	1493.81	1050.01	1270.84	1268.33	1137.47	817.755	1551.39	1092.44	1369.9	1252.05	964.216	1263.85	1236.21	1413.64	1224.09	1266.7	1373.35	1531.23
ENSCPOG00000000473	16.3325	21.7907	0	17.0124	0	14.1397	9.16238	4.89916	5.73903	0.897767	67.3011	1.02334	9.01353	0	9.13906	14.2177	12.415	0	5.69635	0	3.40816	0	0.967296
ENSCPOG00000000474	8.16627	11.4142	13.0901	12.2867	17.416	4.15872	17.4085	19.5966	23.9126	14.3643	48.8625	18.4202	3.60541	19.7391	16.4503	27.1428	9.10437	17.3571	30.3805	28.612	13.6326	11.9076	18.3786
ENSCPOG00000000477	1195	791.728	1030.62	857.236	1315.42	1296.69	1321.21	952.397	885.724	1009.09	526.424	1355.93	625.539	862.996	1024.49	642.38	1199.29	875.567	1505.73	768.791	611.196	1257.25	979.871
ENSCPOG00000000479	1718.55	1961.16	2597.07	3152.97	2409.55	2983.47	2098.18	2889.52	2424.74	2718.44	1963.72	2301.5	2990.69	2994.82	3012.23	1991.77	2841.39	2353.81	2676.33	2825.12	2735.62	2496.64	2674.57
ENSCPOG00000000480	3758.3	3523.86	4207.14	3962	3969.82	4119.63	4017.7	3643.02	3562.98	3746.38	3806.66	4754.45	3423.34	4375.77	4064.14	3714.69	4227.74	3720.2	4111.81	3963.38	3238.89	4088.29	3931.09
ENSCPOG00000000481	0	0	0	1.89027	0	0	0	0	0	0	7.37546	0	0	0	0	0	0	0	0	0	0	1.98461	0
ENSCPOG00000000482	5025.88	4735.84	4856.41	4764.42	5148.99	4846.57	6245.99	4702.21	4911.65	5210.64	5002.41	4313.39	5399.1	4948.21	4916.81	5260.54	4663.09	5253.4	5592.86	5379.05	4332.91	5509.27	4673.97
ENSCPOG00000000484	625.173	283.279	369.139	278.814	379.054	233.72	417.804	361.558	357.733	327.685	555.926	384.777	261.392	236.08	352.768	488.571	347.621	440.676	311.4	334.636	302.19	333.414	328.881
ENSCPOG00000000488	1808.37	2004.74	3061.33	2480.98	2994.53	3247.13	2343.74	2674.94	2117.7	3162.83	2777.78	2373.13	3266.5	2817.96	2959.23	2265.78	3249.43	2777.13	2956.4	2858.71	2726.53	2494.65	2613.63
ENSCPOG00000000489	507.216	724.28	466.006	395.066	591.119	321.885	366.495	358.619	436.166	432.724	567.911	428.781	546.22	347.409	401.205	442.04	561.988	767.568	442.416	575.971	628.237	446.537	456.564
ENSCPOG00000000492	0	21.7907	22.6894	0	0	0	2.74871	24.4958	21.0431	0	0	25.5836	0	7.89566	0.913906	5.17006	0	0	2.84817	0	3.40816	5.95382	13.5421
ENSCPOG00000000493	757.648	702.49	888.378	1084.07	859.531	1110.38	760.477	787.785	1229.11	949.838	887.822	818.675	1105.06	1096.71	883.747	867.278	1195.98	882.317	974.075	969.075	1189.45	871.242	993.413
ENSCPOG00000000496	1191.37	782.389	898.85	810.925	864.653	941.534	983.123	884.788	1192.76	1064.75	1018.74	811.511	989.685	923.003	801.496	997.822	703.519	816.746	1127.88	951.659	929.291	1069.7	1010.82
ENSCPOG00000000501	0	0	3.49068	3.78053	3.07341	0	0.916238	0	5.73903	0	2.7658	9.21009	7.21082	4.7374	0	0	0	13.4999	8.54452	0	10.2245	2.97691	3.86918
ENSCPOG00000000502	430.998	594.574	890.996	706.015	852.359	945.693	826.446	731.935	570.077	913.927	697.903	837.095	685.028	1161.45	859.072	391.632	779.665	804.21	1038.63	603.339	582.795	835.519	781.575
ENSCPOG00000000503	381.093	118.292	21.8168	113.416	27.6607	4.99046	139.268	67.6084	311.821	118.505	980.015	242.532	27.0406	3.15826	3.65562	43.9455	1.65534	617.14	21.836	26.124	11.3605	4.96152	12.5748
ENSCPOG00000000504	171.492	89.238	34.9068	15.1221	25.6118	19.9619	32.0683	27.4353	47.8253	34.1152	126.305	32.747	41.4622	13.4226	28.3311	50.4081	29.7961	71.3568	8.54452	13.684	11.3605	19.8461	28.0516
ENSCPOG00000000506	3.62945	1.03765	4.36335	10.3965	2.04894	6.65395	1.83248	0.979832	2.86952	5.3866	0	6.14006	1.80271	3.15826	5.48344	11.6326	7.44903	0	3.79756	3.732	7.95237	9.92303	4.83648
ENSCPOG00000000507	576.176	864.363	725.189	633.24	680.248	692.011	687.178	774.067	1019.63	575.469	669.323	900.542	712.069	663.235	735.694	956.461	827.67	606.533	704.448	766.303	969.053	941.696	523.307
ENSCPOG00000000510	755.834	1539.87	1176.36	1310.9	1374.84	1349.09	791.629	1080.75	956.505	1233.53	766.126	1189.13	1433.15	1516.76	1363.55	907.346	1474.08	1137.85	1116.48	834.723	1263.29	1007.19	1141.41
ENSCPOG00000000511	0	5.18826	0.87267	3.78053	5.12235	6.65395	2.74871	4.89916	8.60855	5.3866	3.68773	0	5.40812	4.7374	7.31125	1.29252	5.79369	2.89284	4.74696	2.488	1.13605	9.92303	5.80378
ENSCPOG00000000514	291.264	313.371	368.267	360.096	370.858	274.476	394.898	346.861	491.644	312.423	472.952	246.626	331.698	267.663	348.198	584.217	379.073	303.748	310.451	496.355	377.17	349.291	321.142
ENSCPOG00000000517	3999.66	4516.9	5102.5	5436.41	4438.01	4846.57	4342.05	5818.24	4151.23	5050.84	5712.3	4544.67	5402.71	4905.57	5013.69	5606.93	5080.24	4839.73	4558.03	5600.48	5274.69	4823.59	4928.37
ENSCPOG00000000520	1019.88	2400.09	1069.89	4085.81	1327.71	814.278	1258.91	1360.99	1792.49	717.316	920.089	574.096	1631.45	722.453	1545.42	1600.13	2403.55	944.031	1117.43	689.175	1638.19	732.32	1269.09
ENSCPOG00000000521	4460.6	5170.62	5377.39	4814.51	7276.81	6368.67	4944.93	5415.53	5117.3	5302.21	3690.5	5323.43	6421.24	5499.33	5695.46	5936.52	5605.81	4956.4	6657.13	6457.6	6107.42	6465.85	4930.31
ENSCPOG00000000525	2294.72	3733.47	4091.08	4205.84	3868.4	4392.44	2539.81	4148.61	3263.6	4292.22	2958.48	3619.57	5867.81	4345.77	4787.95	3682.38	4487.62	3659.45	3872.57	4126.34	5212.21	3689.38	3609.95
ENSCPOG00000000528	25.4062	98.5769	0	0	0	17.4666	0	7.83866	15.3041	0	94.0372	38.8871	25.2379	4.7374	21.9337	0	6.62136	30.857	0	6.21999	0	4.96152	9.67296
ENSCPOG00000000531	330.28	239.697	320.27	279.76	229.481	214.59	308.772	214.583	232.431	191.224	274.736	140.198	189.284	293.719	236.702	250.748	326.929	228.535	326.591	221.432	268.108	288.76	267.941
ENSCPOG00000000533	8.16627	9.33886	8.7267	4.72567	13.3181	6.65395	0.916238	1.95966	1.91301	0.897767	13.829	6.14006	1.80271	0.789566	4.56953	2.58503	0.82767	5.78569	3.79756	3.732	5.68026	6.94612	3.86918
ENSCPOG00000000534	891.938	1035.58	1013.17	1188.98	1264.2	1127.01	975.793	1122.89	1176.5	1000.11	1315.6	941.476	1094.24	1114.08	1152.44	1130.95	1067.69	978.745	939.897	1150.7	1094.02	1144.13	973.1
ENSCPOG00000000537	1029.86	2071.15	2049.9	2292.89	2052.01	2396.25	1502.63	2005.72	1627.02	2186.96	1709.26	1881.93	2565.25	2641.89	2544.31	1667.34	2406.86	1946.88	2028.85	1870.97	2499.32	1933.01	1945.23
ENSCPOG00000000543	4356.25	3340.2	4783.98	3047.11	3454.51	3826.02	4867.97	3752.76	4375.06	4554.37	7383.76	2610.55	6240.97	3015.35	3283.66	4541.9	3645.06	4466.55	2711.46	4167.4	4209.08	4698.56	4022.98
ENSCPOG00000000545	0	3.11295	0	22.6832	19.4649	0	27.4871	4.89916	20.0866	0	11.9851	0	10.8162	14.2122	2.74172	5.17006	14.0704	28.9284	12.3421	1.244	13.6326	20.8384	0.967296
ENSCPOG00000000546	0	0	0	0	0	0	0	0	0	0	0	0	0	3.94783	0	0	0	9.64281	0	0	5.68026	0	0
ENSCPOG00000000548	32.6651	1.03765	20.9441	20.7929	27.6607	21.6253	41.2307	37.2336	41.1297	43.0928	41.487	42.9804	14.4216	25.2661	27.4172	14.2177	10.7597	26.9999	26.583	24.88	6.81632	32.746	11.6076
ENSCPOG00000000549	97.9952	29.0542	2.61801	0	2.04894	0.831744	3.66495	35.274	1.91301	2.6933	55.316	27.6303	3.60541	0	2.74172	0	9.10437	46.2855	20.8866	0	13.6326	3.96921	0.967296
ENSCPOG00000000550	11.7957	77.8238	9.59937	14.177	30.7341	40.7555	31.1521	11.758	63.1293	69.1281	38.7212	100.288	27.0406	16.5809	2.74172	14.2177	33.9345	45.3212	15.1903	28.612	38.6258	17.8615	19.3459
ENSCPOG00000000553	65.3301	84.0497	71.5589	86.9523	87.08	107.295	65.9691	98.963	104.259	79.9013	80.2082	82.8908	122.584	103.433	84.0794	95.6461	66.2136	139.821	85.4452	87.0799	97.7005	71.4458	92.8604
ENSCPOG00000000554	223.211	65.372	13.0901	21.7381	23.5628	9.14919	31.1521	23.516	40.1732	29.6263	472.952	40.9337	10.8162	8.68523	54.8344	24.5578	27.3131	211.178	39.8744	4.97599	11.3605	3.96921	21.2805
ENSCPOG00000000555	272.209	539.579	500.913	339.303	442.571	391.752	444.375	481.098	392.167	447.986	525.502	392.964	427.241	404.258	413.086	482.108	408.869	365.462	326.591	432.912	528.265	502.106	403.362
ENSCPOG00000000556	381.093	407.797	219.913	176.74	297.096	252.018	301.442	237.119	296.517	259.455	686.84	228.206	218.127	210.025	285.139	301.156	218.505	375.105	355.072	327.172	279.469	254.03	232.151
ENSCPOG00000000559	5062.18	3988.73	5231.66	4633.99	5727.81	5684.14	5358.16	4499.39	4031.67	4877.57	3714.47	5059.41	3601.81	4896.1	4863.81	3877.55	4959.4	5048.97	5516.91	3832.76	3495.63	4259.96	5178.9
ENSCPOG00000000560	18747.9	32204.5	19539.1	28313.4	17930.3	16000.3	27896.7	28354.4	17605.4	18017.3	29546.1	33840.9	27439	17973.7	16255.6	21954.7	20349.9	26437.7	21034.7	23466.8	20909.1	24423.6	21363.7
ENSCPOG00000000562	482.717	538.541	495.677	506.592	392.372	746.906	249.217	664.326	450.514	533.274	188.996	571.026	490.336	822.728	730.211	319.251	696.898	334.605	491.785	490.135	535.081	459.436	473.975
ENSCPOG00000000564	201.435	185.74	244.348	160.673	292.999	168.844	185.08	224.382	217.127	205.589	110.632	223.089	153.23	189.496	138.914	160.272	167.189	227.57	189.878	186.6	155.639	203.422	161.538
ENSCPOG00000000566	317.577	196.116	176.279	146.496	193.625	123.93	263.876	112.681	250.604	105.039	213.888	256.859	82.9244	135.805	154.45	85.306	195.33	112.821	246.842	172.916	127.238	164.722	77.3837
ENSCPOG00000000567	52.6271	228.283	140.5	189.027	128.059	286.12	162.174	147.955	208.518	162.496	181.621	245.602	192.889	244.765	201.059	138.299	161.396	190.928	145.257	177.892	265.836	229.222	199.263
ENSCPOG00000000569	508.123	617.402	369.139	387.505	345.247	406.723	505.763	332.163	396.95	315.116	694.216	468.691	374.963	388.466	428.622	485.986	372.451	495.64	367.414	507.551	437.38	489.206	418.839
ENSCPOG00000000570	430.998	672.398	678.065	492.415	583.948	898.284	391.234	725.076	393.124	568.287	426.855	754.204	520.982	712.978	624.198	423.945	693.587	669.211	632.295	558.555	569.163	664.843	477.844
ENSCPOG00000000571	0	21.7907	11.3447	4.72567	6.14682	0	30.2358	0	0	16.1598	3.68773	9.21009	0	3.15826	5.48344	0	0.82767	0	6.64574	4.97599	3.40816	4.96152	0
ENSCPOG00000000572	360.223	454.491	631.813	636.075	466.134	514.85	627.623	639.83	570.077	565.593	618.617	715.317	329.895	705.082	503.562	368.367	642.272	783.96	699.701	386.884	440.789	468.367	776.739
ENSCPOG00000000576	0	3.11295	11.3447	0	2.04894	10.8127	7.3299	7.83866	0	0	7.37546	11.2568	9.01353	7.10609	0	1.29252	5.79369	0.964281	0	0	5.68026	3.96921	3.86918
ENSCPOG00000000580	1589.7	1848.06	1919.87	1778.74	1439.38	2072.71	1668.47	1695.11	1745.62	1670.74	1025.19	1726.38	1341.21	1921.8	1798.57	1350.68	1916.06	1699.06	1621.56	1452.99	1231.48	1468.61	1874.62
ENSCPOG00000000584	984.489	1880.22	1710.43	1589.71	1756.97	1605.27	1565.85	1875.4	1576.32	1926.61	2471.7	1439.84	2453.48	1868.11	2147.68	1777.21	2105.59	1586.24	1659.54	1817.48	2314.14	1854.62	1570.89
ENSCPOG00000000585	8.16627	8.30121	0	0	0	26.6158	17.4085	1.95966	0	0	0	0	0	1.57913	22.8477	28.4353	0.82767	20.2499	0	12.44	4.54421	15.8769	5.80378
ENSCPOG00000000586	1374.66	2825.52	3034.27	2708.75	3138.98	3064.98	2269.52	3120.76	2346.31	3152.06	2083.57	3099.71	3675.72	3887.03	3848.46	2547.55	3568.91	2857.16	3190.9	3072.68	3450.19	3130.72	2652.33
ENSCPOG00000000589	156.974	130.744	137.882	175.795	161.866	167.181	164.923	152.854	184.606	129.278	209.279	136.105	182.073	117.645	165.417	179.66	150.636	128.249	168.042	157.988	147.687	145.869	155.735
ENSCPOG00000000590	58.0712	121.405	32.2888	59.5434	31.7586	31.6063	47.6444	25.4756	33.4777	29.6263	35.9554	79.8208	16.2243	22.8974	42.0397	41.3605	43.8665	32.7855	39.8744	29.856	31.8095	53.5844	45.4629
ENSCPOG00000000591	3270.14	4935.07	1516.7	2532.96	1695.5	2269.83	2042.29	1703.93	2200.92	1466.95	1587.57	4051.42	1036.56	2350.54	1836.04	1640.2	1964.06	2696.13	2004.16	1206.68	1364.4	2009.41	2882.54
ENSCPOG00000000592	641.506	601.838	699.881	660.648	805.234	610.5	535.999	669.225	588.251	638.312	537.487	775.694	585.879	620.599	620.542	655.305	527.226	651.854	735.778	679.223	578.251	649.959	692.584
ENSCPOG00000000596	1607.85	1700.71	1649.35	1365.72	1936.25	1640.2	1784.83	1507.96	1547.63	1822.47	1505.52	1628.14	1393.49	1797.84	1751.04	1426.94	1759.63	1935.31	2015.56	1542.56	1351.9	2039.18	1738.23
ENSCPOG00000000598	13405.4	8817.96	14713.2	10439	14351.8	13261.3	12764.1	11982.4	10979.7	13551.8	9428.61	10361.4	13560	12841.5	12639.3	15211.6	12434.9	11170.2	13490.8	14098.2	11156	16076.3	12379.5
ENSCPOG00000000599	133.382	132.819	299.326	133.264	252.02	259.504	144.766	114.64	137.737	172.371	234.171	194.435	151.427	183.969	219.337	147.347	178.777	147.535	193.676	148.036	138.598	207.391	196.361
ENSCPOG00000000601	112.513	111.029	20.9441	81.2815	21.5139	49.9046	120.027	45.0723	63.1293	37.7062	120.773	24.5602	57.6866	71.8505	63.0595	42.653	41.3835	58.8211	46.5202	41.052	73.8434	53.5844	42.561
ENSCPOG00000000603	743.13	653.72	570.726	554.793	551.165	469.104	875.923	572.222	571.99	635.619	814.989	460.505	468.703	485.583	443.244	646.258	480.876	564.104	542.102	644.391	496.455	596.374	671.303
ENSCPOG00000000605	121.587	392.232	268.782	261.802	294.023	243.701	365.579	260.635	250.604	282.797	263.673	138.151	275.814	374.254	307.986	190	248.301	190.928	259.184	250.044	285.149	242.122	270.843
ENSCPOG00000000606	75.3111	156.685	138.755	130.428	115.765	145.555	104.451	112.681	58.3468	116.71	107.866	213.879	176.665	135.016	108.755	156.394	153.947	146.571	109.18	182.868	194.265	149.838	114.141
ENSCPOG00000000607	0	5.18826	0	0	0	0	0	0	0	0	0	0	0	0	1.82781	0	0	2.89284	0	2.488	2.27211	0	5.80378
ENSCPOG00000000608	186.009	241.773	294.09	324.181	265.338	394.247	176.834	229.281	281.213	304.343	328.208	204.669	250.576	367.938	286.967	170.612	306.238	245.892	241.145	215.212	249.932	204.415	290.189
ENSCPOG00000000614	955.453	1156.98	1000.95	943.243	1007.05	1029.7	847.52	887.728	934.506	922.905	749.532	1059.16	886.931	832.203	956.86	970.679	1117.35	865.924	954.138	873.287	1211.03	1077.64	925.702
ENSCPOG00000000615	82.57	86.125	44.5062	102.074	43.0278	69.0348	98.0374	24.4958	145.389	87.9812	332.818	172.945	36.0541	133.437	31.0728	29.7279	33.9345	138.856	154.751	78.3719	67.0271	63.5074	20.3132
ENSCPOG00000000616	380.185	505.336	447.68	524.549	562.434	547.288	581.811	426.227	407.471	486.59	557.769	453.341	634.552	491.11	554.741	651.428	517.293	457.069	439.568	459.036	540.761	522.944	368.54
ENSCPOG00000000617	390.166	207.53	291.472	275.979	232.555	252.85	418.721	346.861	441.905	309.73	227.717	320.307	255.984	262.925	266.861	377.414	304.582	261.32	318.995	371.956	294.238	318.529	303.731
ENSCPOG00000000618	14.5178	7.26356	15.7081	6.61594	15.3671	6.65395	10.9949	7.83866	15.3041	7.18214	3.68773	6.14006	7.21082	11.0539	0	2.58503	0	0	20.8866	3.732	26.1292	3.96921	8.70566
ENSCPOG00000000621	626.988	540.616	592.543	433.816	744.79	628.799	765.058	387.034	512.687	546.74	382.602	204.669	452.479	619.02	473.403	527.346	595.094	530.354	573.432	431.668	388.53	643.013	409.166
ENSCPOG00000000622	61.7007	13.4895	0	6.61594	4.09788	4.15872	3.66495	10.7782	0	16.1598	67.3011	36.8404	0	0	10.053	0	0	36.6427	0	2.488	3.40816	1.98461	3.86918
ENSCPOG00000000625	1574.28	1365.55	1173.74	1408.25	1220.14	1118.7	1261.66	1041.56	1430.93	1171.59	1812.52	1396.86	1418.73	1199.35	964.171	1666.05	1044.52	1084.82	919.011	1496.53	1370.08	1590.66	1122.06
ENSCPOG00000000626	2150.45	2411.5	2611.9	2944.09	2715.87	2688.2	2799.11	2710.22	2840.82	2388.06	2169.31	3000.44	3125.89	2865.33	2991.21	2278.7	3163.35	2593.92	2641.21	3215.74	2807.19	2580.98	2802.26
ENSCPOG00000000629	362.945	388.082	438.08	376.163	306.317	513.186	398.563	406.63	351.994	413.871	411.182	515.765	519.179	484.004	553.827	358.027	575.23	296.999	410.137	312.244	412.387	536.836	501.059
ENSCPOG00000000630	2.72209	6.22591	0	0	0	0	0	10.7782	0	4.48884	0	0	3.60541	0	0	0	0	0	0	3.732	0	0	0
ENSCPOG00000000631	928.233	1417.43	1699.96	1991.4	1938.3	2186.66	1426.58	1788.19	1230.07	1957.13	1570.05	1748.89	2705.86	2060.77	2046.24	1575.58	1889.57	1731.85	1460.16	1596.05	1952.87	1805	1637.63
ENSCPOG00000000632	7723.48	6891.04	10160.5	8080.89	7982.67	8559.48	9160.54	8348.17	8708.98	9656.38	7403.12	8616.55	11268.7	9398.99	8267.19	9639.58	8681.43	9297.6	8681.23	11530.6	9195.21	11147.5	9520.13
ENSCPOG00000000634	217.767	196.116	167.553	145.551	127.034	147.219	238.222	214.583	162.606	188.531	319.911	167.828	187.481	178.442	170.9	284.353	154.774	132.106	98.7367	171.672	185.177	192.507	202.165
ENSCPOG00000000635	32.6651	16.6024	0	0	19.4649	5.82221	1.83248	0	0	2.6933	164.104	7.1634	7.21082	3.94783	0	0	10.7597	13.4999	0	8.70799	3.40816	0	8.70566
ENSCPOG00000000640	25.4062	0	26.1801	66.1594	43.0278	18.2984	10.9949	37.2336	47.8253	19.7509	0.921933	22.5136	9.01353	48.1635	42.0397	19.3877	83.5946	42.4284	27.5323	6.21999	32.9455	50.6075	19.3459
ENSCPOG00000000643	1384.64	1343.76	1532.41	1567.03	1504.95	1408.14	1604.33	1194.42	1231.98	1566.6	1991.38	1066.32	1317.78	1372.27	1411.07	1351.97	1584.99	1390.49	1272.18	1404.47	1346.22	1465.63	1374.53
ENSCPOG00000000646	2038.85	1960.12	1491.39	1467.79	1700.62	1696.76	1458.65	1284.56	1752.32	1581.87	1127.52	1927.98	1961.34	1685.72	1645.03	1681.56	1668.58	1562.14	1647.19	1771.45	2018.77	1772.25	1562.18
ENSCPOG00000000647	239.544	256.3	321.143	292.046	360.614	271.98	332.594	257.696	283.126	318.707	283.955	253.789	216.325	317.406	239.443	137.007	269.82	260.356	261.083	121.912	117.013	238.153	245.693
ENSCPOG00000000648	1.81473	49.8073	37.5248	45.3664	44.0522	32.438	27.4871	28.4151	26.7821	23.3419	49.7844	5.11672	37.8568	19.7391	44.7814	24.5578	32.2791	67.4997	44.6214	22.392	62.4829	14.8846	23.2151
ENSCPOG00000000649	1.81473	4.1506	0	0	0	0	0	0	0	0	0.921933	0	0	2.3687	2.74172	3.87755	0	0.964281	0	0	0	0	0.967296
ENSCPOG00000000651	158.789	299.881	162.317	181.466	150.597	133.911	151.179	157.753	212.344	143.643	225.874	214.902	221.733	212.393	273.258	173.197	175.466	197.678	129.117	186.6	264.7	206.399	151.865
ENSCPOG00000000652	911.9	1089.53	970.409	991.445	1918.83	1139.49	1192.03	1787.21	1129.63	1136.57	1775.64	926.126	1510.67	1310.68	1166.14	1156.8	1047.83	987.424	1725.99	1614.71	1349.63	1145.12	1023.4
ENSCPOG00000000654	38.1093	5.18826	35.7795	18.9027	27.6607	17.4666	4.58119	1.95966	4.78253	25.1375	32.2677	39.9104	28.8433	30.7931	10.053	58.1632	28.1408	27.9641	26.583	11.196	29.5374	22.823	21.2805
ENSCPOG00000000656	338.446	297.806	208.568	209.82	245.873	190.469	203.405	212.624	274.517	180.451	245.234	167.828	102.754	173.705	246.755	209.387	211.056	199.606	270.576	222.676	181.768	200.445	175.081
ENSCPOG00000000660	1425.47	1843.91	1768.9	1704.08	1746.72	1783.26	1620.82	1726.46	1603.1	1877.23	2680.98	1696.7	1166.35	1901.27	1941.14	1841.83	2105.59	1555.39	1553.2	1068.59	1855.17	1145.12	1775.96
ENSCPOG00000000663	264.043	131.782	226.894	314.73	385.201	321.885	277.62	293.95	284.082	409.382	299.628	85.9609	297.446	196.602	202.887	280.476	329.412	232.392	242.095	263.728	312.415	123.046	154.767
ENSCPOG00000000664	728.613	792.765	666.72	675.771	509.162	555.605	720.163	500.694	777.639	733.476	814.989	986.503	748.123	551.907	657.098	738.026	579.369	716.461	633.244	598.363	698.673	790.866	755.458
ENSCPOG00000000667	805.739	840.497	1014.92	942.298	900.51	866.677	916.238	923.982	818.769	1009.09	1271.35	671.313	1229.45	874.839	915.734	1080.54	837.602	885.21	723.436	1057.4	1042.9	1024.06	865.73
ENSCPOG00000000669	710.465	1203.68	1048.95	1387.46	1187.36	1208.52	1024.35	1285.54	941.201	1285.6	1215.11	1014.13	1642.26	1410.16	1305.06	1015.92	1364	1332.64	1070.91	1171.85	1282.6	1214.58	1022.43
ENSCPOG00000000671	0	0	0	0	0	0	1.83248	0	0	0	26.7361	0	0	0	0.913906	1.29252	9.10437	10.6071	0	1.244	0	0	0
ENSCPOG00000000675	0	18.6777	0	0	0	0	0	0	0	11.671	43.3309	0	0	0	3.65562	0	0	13.4999	0	0	0	0.992303	0
ENSCPOG00000000677	130.66	78.8615	519.239	75.6107	789.867	272.812	117.278	212.624	1009.11	243.295	162.26	1346.72	288.433	859.048	204.715	175.782	244.163	176.463	1045.28	196.552	157.911	830.558	1465.45
ENSCPOG00000000679	429.183	636.08	617.85	765.558	699.713	855.033	664.272	824.039	447.644	865.448	749.532	803.325	989.685	898.526	846.277	571.292	850.017	582.426	673.118	792.427	823.638	694.612	719.668
ENSCPOG00000000680	0	30.0919	6.10869	6.61594	2.04894	0	4.58119	16.6571	13.3911	0	16.5948	0	21.6325	6.31653	11.8808	0	13.2427	19.2856	13.2915	2.488	24.9932	2.97691	5.80378
ENSCPOG00000000681	142.456	382.893	391.829	349.699	292.999	288.615	227.227	403.691	300.343	382.449	280.268	162.712	445.268	276.348	331.748	560.952	302.099	296.999	361.718	513.771	438.516	466.383	284.385
ENSCPOG00000000684	821.164	864.363	788.894	805.254	864.653	854.201	789.797	863.232	947.897	765.795	1029.8	807.418	885.128	871.681	774.078	1306.73	811.944	944.031	994.013	959.123	1121.28	949.634	774.804
ENSCPOG00000000686	973.601	1339.61	1097.82	1236.23	1132.04	1379.03	925.4	1318.85	1258.76	1002.81	840.803	1601.53	1220.43	1298.84	1375.43	1159.39	1412.83	1157.14	1075.66	1278.83	1273.52	1032.99	1259.42
ENSCPOG00000000687	676.893	527.127	536.692	502.811	527.602	435.834	797.127	479.138	554.773	618.562	996.61	477.901	400.201	413.733	511.787	496.326	420.456	612.318	410.137	495.111	365.809	454.475	609.396
ENSCPOG00000000688	494.513	180.551	316.779	296.772	298.121	229.561	273.039	258.676	420.862	118.505	680.387	237.416	270.406	202.918	174.556	283.061	211.056	357.748	186.081	390.616	257.884	198.461	294.058
ENSCPOG00000000690	1543.42	1177.73	1526.3	1358.16	1602.27	1517.93	1458.65	1444.27	1217.63	1547.75	1347.87	1561.62	1472.81	1496.23	1526.22	1447.62	1210.05	1525.49	1776.31	1477.87	1467.78	1465.63	1696.64
ENSCPOG00000000691	3615.84	3221.91	4509.96	4456.31	4071.25	4876.52	4167.05	4239.73	3955.15	4819.21	4484.28	3814	6044.47	5028.75	4503.73	5078.29	4456.17	4701.83	4053.9	5314.36	5295.14	4636.04	4340.26
ENSCPOG00000000693	36.2945	52.9202	29.6708	62.3788	38.9299	59.0538	119.111	46.0521	97.5635	51.1727	68.223	82.8908	41.4622	56.8487	68.543	74.9659	76.1456	49.1783	44.6214	79.6159	82.9319	71.4458	82.2202
ENSCPOG00000000694	275.838	474.207	361.285	532.11	426.18	474.094	378.406	419.368	544.252	501.852	559.613	476.878	600.301	511.639	536.463	449.795	500.74	564.104	545.9	429.18	586.203	455.467	442.054
ENSCPOG00000000695	804.831	672.398	574.217	548.178	632.098	593.034	836.525	602.597	644.685	618.562	1116.46	507.578	546.22	521.114	654.357	682.448	572.747	615.211	581.977	503.819	463.51	697.589	604.56
ENSCPOG00000000696	61.7007	117.255	60.2142	97.3488	74.7863	68.203	83.3776	84.2656	136.78	48.4794	98.6468	68.564	160.441	61.5861	75.8542	72.3809	83.5946	139.821	66.4574	90.8119	127.238	91.2919	60.9396
ENSCPOG00000000697	518.104	404.684	548.037	533.055	454.865	502.373	554.324	463.461	441.905	614.971	694.216	582.282	484.928	505.322	570.277	586.802	561.988	526.497	417.732	645.635	618.013	626.143	560.064
ENSCPOG00000000699	2022.51	2174.92	2042.05	1743.77	2029.48	2185.82	1741.77	1854.82	1970.4	1879.03	1550.69	1724.33	1133.9	1948.65	2040.75	1549.73	1749.69	1826.35	1822.83	1440.55	1468.92	1545.02	2067.11
ENSCPOG00000000700	19.962	52.9202	32.2888	34.9699	21.5139	41.5872	39.3982	34.2941	31.5647	38.604	67.3011	41.9571	14.4216	46.5844	44.7814	42.653	42.2111	22.1785	31.3299	31.1	30.6734	41.6767	36.7572
ENSCPOG00000000701	9.07363	0	0	0	0	0	0	0	0	4.48884	14.7509	14.3268	0	0	0	0	0	3.85712	0	0	0	0	0
ENSCPOG00000000703	1874.61	1207.83	1548.12	1512.21	1501.87	1193.55	1865.46	1471.71	1487.37	1871.84	2601.7	1107.26	1525.09	1058.81	1105.83	1768.16	1102.46	1499.46	1405.1	1532.61	1313.28	1590.66	1580.56
ENSCPOG00000000707	253.154	231.396	191.115	191.862	282.754	222.076	248.3	194.007	273.561	215.464	209.279	204.669	183.876	175.284	171.814	188.707	241.68	188.035	188.929	177.892	216.986	211.361	220.543
ENSCPOG00000000708	7.25891	7.26356	6.10869	4.72567	6.14682	9.98093	6.41366	7.83866	15.3041	8.97767	2.7658	5.11672	0	9.47479	6.39734	1.29252	4.13835	7.71425	7.59513	2.488	0	0	4.83648
ENSCPOG00000000709	744.945	662.021	686.791	597.324	704.836	571.408	503.015	608.476	718.335	707.441	691.45	741.924	854.482	744.561	700.052	590.68	706.002	790.71	737.677	613.291	638.462	703.543	595.854
ENSCPOG00000000710	6190.94	3941	4688.86	4211.52	4424.69	3245.47	5838.27	4370.05	4625.66	4908.99	8913.25	3319.73	4176.87	3334.34	3864.91	5401.42	3397.58	4392.3	3772.88	4279.36	3653.55	4319.5	4517.27
ENSCPOG00000000713	3729.26	2638.75	3748.12	2790.98	3611.26	2872.84	3073.06	2721.97	2630.39	3453.71	3022.1	3252.19	1885.63	3310.65	2800.21	2228.3	3396.76	3005.66	3995.99	2501.68	1768.83	2652.43	2997.65
ENSCPOG00000000714	7.25891	0	0	0	0	12.4762	6.41366	14.6975	25.8256	7.18214	96.803	56.2839	1.80271	2.3687	2.74172	19.3877	0	8.67853	0	3.732	9.08842	0	2.90189
ENSCPOG00000000716	88.9216	123.48	136.137	79.3912	267.387	283.625	200.656	108.761	141.563	298.956	294.097	111.544	589.485	236.87	201.973	121.496	196.985	153.321	79.7489	100.764	172.68	204.415	379.18
ENSCPOG00000000717	440.071	557.219	478.223	485.799	469.207	411.713	481.025	449.743	508.861	423.746	305.16	397.057	544.417	491.9	591.297	597.142	557.022	383.784	409.188	473.964	519.176	485.236	367.572
ENSCPOG00000000718	2342.81	2261.04	1462.59	2229.57	1856.34	3000.93	2283.26	1812.69	1535.19	2333.3	1205.89	2745.63	2532.8	3145.63	2395.35	1943.94	2560.81	2458.92	2792.16	2102.36	2795.83	2482.74	2257.67
ENSCPOG00000000720	5.44418	4.1506	6.10869	0	0	0	0	0	0.956505	0	5.5316	0	0	0	0.913906	0	1.65534	5.78569	2.84817	0	1.13605	0	4.83648
ENSCPOG00000000721	1195	1822.12	1089.96	1083.12	1061.35	1209.36	1093.07	1152.28	1464.41	1000.11	1341.41	1430.63	1088.83	1069.07	1230.12	1523.88	1144.67	1094.46	1364.28	1275.1	1514.36	1199.69	1089.18
ENSCPOG00000000723	7572.85	5890.75	4910.51	5447.75	4245.41	3874.26	6464.06	4886.42	5217.74	5143.31	9445.2	4425.96	4117.38	3362.76	4585.98	4690.54	3691.41	4865.76	3384.58	3520.52	3380.89	4229.2	6113.31
ENSCPOG00000000724	435.534	549.955	460.77	388.45	394.421	398.405	316.102	514.412	512.687	331.276	524.58	531.115	472.309	438.209	496.251	602.312	380.728	375.105	393.997	388.128	462.374	511.036	474.942
ENSCPOG00000000725	1749.4	1675.81	2248	2504.6	2120.65	2263.18	1751.85	2536.79	2016.31	2564.02	2105.7	1782.66	2662.6	2483.97	2883.37	2176.6	2632.82	2340.31	2464.62	1926.95	2507.27	1747.45	2509.17
ENSCPOG00000000729	4646.61	2832.79	3045.62	3015.92	3841.76	2832.09	3677.78	3612.64	4147.41	3793.07	4484.28	2457.05	3832.55	2357.64	3083.52	4357.07	2821.53	3417.41	5357.41	4606.53	3115.06	4110.12	3416.49
ENSCPOG00000000730	0	0	0	0	1.02447	1.66349	0	0	0	0	0	0	0	2.3687	0	0	2.48301	0	0	3.732	0	0	0
ENSCPOG00000000732	264.95	414.023	647.521	510.372	628	564.754	330.762	511.472	257.3	650.881	307.004	588.423	641.763	747.719	520.013	464.013	504.051	347.141	370.263	480.183	565.754	542.79	497.19
ENSCPOG00000000735	777.61	1027.27	1312.5	1346.82	1466.02	1184.4	954.72	1257.12	925.897	1325.1	1130.29	1775.5	1584.58	1763.1	1279.47	831.087	1418.63	1084.82	1348.14	1128.31	1198.54	1083.6	1097.88
ENSCPOG00000000736	1342.9	1501.48	1739.23	1780.63	1578.71	1636.87	1489.8	1925.37	1845.1	1782.07	1777.49	1687.49	1608.01	1628.08	1844.26	1660.88	1851.5	1568.88	1865.55	1683.13	1823.36	1534.1	1742.1
ENSCPOG00000000739	264.043	435.813	239.984	315.675	295.047	306.082	222.646	275.333	384.515	256.761	238.781	416.501	207.311	409.785	298.847	235.238	327.757	308.57	383.554	292.34	285.149	301.66	354.998
ENSCPOG00000000740	4462.41	3402.46	3561.37	3584.89	4436.98	3596.46	4440.09	4003.59	3841.33	3848.73	3661.92	4358.42	2121.78	4123.9	3871.31	3089.11	4399.89	4425.08	4667.21	3280.42	2874.21	2947.14	4026.85
ENSCPOG00000000741	1390.99	1594.87	2091.79	1653.04	1859.41	1824.01	1630.9	2167.39	2053.62	1801.82	1643.81	2072.27	1337.61	1506.49	1680.67	1477.35	1651.2	1893.85	2193.09	2001.59	1777.92	1394.19	1636.66
ENSCPOG00000000743	1957.18	2922.03	3473.23	3393.03	3221.96	3424.29	2582.87	3431.37	2867.6	3701.49	3563.27	3256.28	4171.46	3937.57	3744.27	3036.12	3892.53	3257.34	4126.05	3694.68	4068.21	3159.49	3362.32
ENSCPOG00000000745	100.717	114.142	158.826	130.428	142.401	132.247	130.106	129.338	121.476	152.62	94.9591	183.178	64.8974	117.645	141.655	89.1836	178.777	144.642	165.194	119.424	111.333	116.099	153.8
ENSCPOG00000000746	48.0902	84.0497	74.177	51.9824	36.8809	51.5681	66.8854	80.3462	78.4334	55.6616	52.5502	48.0971	27.0406	22.1078	59.4039	78.8434	47.1772	50.1426	94.9391	73.3959	92.0203	53.5844	69.6453
ENSCPOG00000000754	528.085	520.901	592.543	702.234	505.064	1036.35	497.517	701.56	630.337	537.763	455.435	746.017	746.32	657.708	849.933	417.482	609.165	587.247	427.226	671.759	802.053	683.697	628.742
ENSCPOG00000000756	6305.27	6545.5	7487.51	7589.42	7463.27	7531.44	7810.93	8389.32	7162.31	8465.94	8134.22	7148.05	9938.31	7518.25	7842.23	9214.34	7673.32	7705.57	7731.84	8744.07	8758.97	7547.46	7544.91
ENSCPOG00000000758	1332.92	1081.23	965.173	1051.93	855.433	1565.34	886.002	1209.11	690.597	978.566	985.546	1488.96	836.455	1458.33	944.065	478.231	981.616	1091.57	1141.17	1057.4	667.999	771.02	882.174
ENSCPOG00000000760	0.907363	19.7154	0	1.89027	0	0.831744	10.0786	2.9395	19.1301	13.4665	20.2825	0	1.80271	3.15826	4.56953	9.04761	14.8981	9.64281	7.59513	4.97599	7.95237	0	0
ENSCPOG00000000762	1476.28	2057.66	1884.09	1848.68	1754.92	1989.53	1354.2	2225.2	1873.79	1806.31	873.993	2590.08	2121.78	2101.03	2026.13	1596.26	1909.43	1832.13	2125.69	2119.77	2219.85	2039.18	1765.32
ENSCPOG00000000764	1155.98	1218.2	1108.29	1157.79	1115.65	1028.87	1198.44	1039.6	1283.63	1148.24	1073.13	1342.63	1178.97	1250.67	1252.05	1421.77	1026.31	1128.21	1290.22	1358.45	1183.77	1256.26	1099.82
ENSCPOG00000000765	174.214	112.066	109.084	100.184	96.3002	72.3617	170.42	120.519	146.345	78.1057	145.665	139.175	124.387	75.0088	108.755	173.197	100.148	134.999	164.245	160.476	135.19	142.892	118.01
ENSCPOG00000000770	159.696	114.142	112.574	83.1718	105.52	120.603	75.1315	82.3059	107.129	107.732	127.227	132.011	155.033	92.3792	116.066	86.5985	113.391	188.999	84.4958	128.132	122.694	115.107	84.1548
ENSCPOG00000000771	152.437	198.191	154.463	141.77	176.209	113.117	109.032	215.563	395.037	168.78	122.617	214.902	109.965	142.122	271.43	226.19	283.891	165.856	168.042	166.696	148.823	161.745	202.165
ENSCPOG00000000772	121.587	132.819	81.1583	63.324	94.2513	69.8665	82.4614	65.6487	67.9119	84.3901	63.6134	83.9142	57.6866	84.4836	93.2184	95.6461	69.5242	85.821	37.0263	95.7879	81.7958	84.3458	66.7434
ENSCPOG00000000775	482.717	276.015	376.121	272.198	254.069	253.682	368.328	175.39	297.473	264.841	259.063	304.956	133.4	288.192	340.887	211.973	222.643	294.106	342.73	162.964	168.136	205.407	312.437
ENSCPOG00000000777	80.7553	83.0121	27.9254	21.7381	36.8809	47.4094	39.3982	53.8908	65.0424	26.0352	54.394	25.5836	28.8433	23.687	42.9536	55.5782	39.7281	49.1783	42.7226	43.54	52.2584	57.5536	36.7572
ENSCPOG00000000778	1.81473	3.11295	3.49068	10.3965	6.14682	0	0.916238	1.95966	1.91301	0	27.658	6.14006	3.60541	0.789566	7.31125	2.58503	2.48301	0.964281	0	0	7.95237	0	0
ENSCPOG00000000779	0	7.26356	0	0	4.09788	0	0	0	0	7.18214	0	0	0	0	5.48344	0	5.79369	0	7.59513	0	0	0	0
ENSCPOG00000000780	1179.57	746.071	942.484	998.061	950.709	806.792	944.641	883.808	811.116	993.828	454.513	803.325	749.925	1013.8	945.893	633.333	986.582	818.674	813.628	812.331	700.945	718.428	875.403
ENSCPOG00000000781	7.25891	0	0	0	0	0	2.74871	0	0	1.79553	6.45353	0	0	0	0	0	2.48301	0	1.89878	0	0	0	0
ENSCPOG00000000782	1647.77	1695.52	1206.03	968.762	1138.19	1092.91	1396.35	1488.36	1767.62	937.269	1466.8	1609.72	794.993	962.481	1068.36	1562.65	1044.52	1194.74	1261.74	1283.81	1139.46	1289.99	1151.08
ENSCPOG00000000783	28.1283	312.333	34.9068	69.9399	68.6395	403.396	559.821	43.1126	72.6944	23.3419	88.5056	423.664	10.8162	19.7391	42.9536	10.3401	28.1408	591.104	27.5323	13.684	20.449	24.8076	480.746
ENSCPOG00000000785	45.3682	70.5603	27.0528	16.0673	2.04894	17.4666	15.576	11.758	36.3472	4.48884	18.4387	27.6303	5.40812	11.0539	7.31125	16.8027	14.8981	17.3571	23.7348	11.196	19.3129	23.8153	22.2478
ENSCPOG00000000786	7357.81	5805.66	5871.32	5610.31	5683.76	4890.66	7382.13	5512.53	6594.15	6521.38	10614.2	4428.01	5601.01	4984.53	5960.5	6532.37	5013.19	5623.69	6509.98	5804.5	4890.71	5249.28	6082.36
ENSCPOG00000000787	2162.25	2228.87	2003.65	1590.66	1879.9	1946.28	2294.26	1770.56	2067.96	1779.37	1932.37	2341.41	1171.76	1545.18	1822.33	1808.23	1697.55	1972.92	2170.31	1444.28	1223.53	1602.57	2063.24
ENSCPOG00000000789	301.245	486.658	418.882	328.907	347.295	454.964	274.871	499.714	297.473	316.912	204.669	244.579	402.003	404.258	329.006	298.571	314.514	364.498	432.922	286.12	307.87	364.175	330.815
ENSCPOG00000000791	28666.3	18870.7	24789.1	23454.4	24155	25096.2	28404.3	25887.2	25672.6	26421.3	21256.1	23538.9	27127.1	27268.4	26305	27186.8	18318.8	25774.3	25199.7	27237.4	22432.5	24560.5	28914.4
ENSCPOG00000000793	0	0	4.36335	0	0	5.82221	0	0	0	0	0.921933	0	0	2.3687	0	9.04761	3.31068	0.964281	0	0	0	1.98461	1.93459
ENSCPOG00000000794	321.207	493.922	438.953	573.696	568.581	362.64	514.009	401.731	489.731	466.839	484.937	570.002	439.86	431.103	579.416	298.571	501.568	505.283	462.354	456.548	452.149	484.244	486.55
ENSCPOG00000000795	0	0	5.23602	3.78053	10.2447	0	2.74871	4.89916	0	1.79553	0	0	0	3.94783	0.913906	1.29252	0	0	0	0	0	1.98461	0.967296
ENSCPOG00000000801	4639.35	7734.65	8684.81	9280.27	7898.67	9838.7	6028.84	9511.23	5567.82	8140.95	3348.46	5721.51	9817.53	11483.4	12506.8	5628.9	9864.99	6313.15	10040.8	6759.89	8794.19	6673.24	7000.32
ENSCPOG00000000803	834.774	1778.53	1700.83	2180.42	1616.61	1822.35	951.055	2266.35	1537.1	1943.67	928.387	1811.32	2675.21	1725.99	2216.22	1613.06	2647.71	1530.31	1876.95	1795.09	3113.92	1186.79	1480.93
ENSCPOG00000000804	611.563	620.515	418.882	539.671	553.214	473.262	544.245	535.968	513.643	466.839	360.476	473.808	688.633	569.277	612.317	500.203	581.852	600.747	597.167	546.115	500.999	433.637	535.882
ENSCPOG00000000805	1420.93	1700.71	2180.8	2369.45	2478.19	2300.6	1678.55	2204.62	1509.37	2372.8	1643.81	1877.84	2907.76	2498.98	2358.79	1610.47	2439.14	2405.88	2370.63	1875.95	2696.99	1805	1962.64
ENSCPOG00000000806	2076.95	2275.57	2477.51	2450.73	2130.9	2447.82	1815.98	2095.86	1864.23	2116.04	1420.7	2663.76	2581.47	2935.61	2764.57	1821.15	2540.95	2190.85	2254.8	1940.64	2315.28	2195.97	2256.7
ENSCPOG00000000809	573.454	447.228	511.385	376.163	469.207	359.313	449.873	447.783	508.861	474.021	801.16	385.801	286.63	340.303	383.841	332.176	387.349	487.926	347.477	369.468	279.469	283.799	426.578
ENSCPOG00000000810	1141.46	2114.73	2099.64	2202.16	1751.84	2396.25	1655.64	2165.43	1665.28	2039.73	1375.52	1627.12	3111.47	2492.66	2313.1	1571.7	2838.08	1833.1	1911.12	2004.08	2560.66	1722.64	1819.48
ENSCPOG00000000811	878.328	466.943	501.785	489.579	486.623	411.713	634.037	302.768	508.861	511.727	844.491	430.828	146.019	419.26	466.092	242.993	475.91	626.783	526.912	228.896	227.211	233.191	402.395
ENSCPOG00000000813	102.532	180.551	199.841	303.388	276.607	313.568	245.552	333.143	157.823	212.771	289.487	203.645	266.8	302.404	261.377	239.115	191.192	256.499	236.398	215.212	262.428	155.792	270.843
ENSCPOG00000000817	9.07363	0	3.49068	9.45134	3.07341	0	6.41366	0	1.91301	3.59107	0	0	0	2.3687	0.913906	9.04761	13.2427	8.67853	0	1.244	5.68026	0	0.967296
ENSCPOG00000000818	1730.34	1188.11	1402.38	1353.43	1650.42	1464.7	1524.62	1423.7	1290.33	1601.62	1165.32	1607.67	1146.52	1389.64	1436.66	1247.28	1229.92	1275.74	1664.28	1546.29	1240.57	807.735	1368.72
ENSCPOG00000000819	1439.99	1079.16	1211.27	1191.81	1134.09	1515.44	1151.71	1370.78	797.725	1471.44	1114.62	1284.3	1443.97	1549.92	1331.56	933.196	1296.13	1007.67	1108.89	1395.77	1314.41	1297.93	1151.08
ENSCPOG00000000820	61.7007	17.6401	32.2888	16.0673	38.9299	24.9523	41.2307	24.4958	59.3033	38.604	71.9108	18.4202	21.6325	11.8435	22.8477	37.4829	33.9345	21.2142	42.7226	23.636	30.6734	39.6921	40.6264
ENSCPOG00000000822	6733.54	13596.3	12866.6	16080.5	11461.8	10825.2	12679.8	15608.7	13646.5	14915.5	13725.7	12204.4	26072.5	12992.3	11568.2	15948.3	13578.7	14167.2	11933.8	17049	20982.9	12493.1	12774.1
ENSCPOG00000000823	1247.62	1537.8	343.832	205.094	139.328	238.711	224.478	370.376	303.212	243.295	1336.8	516.788	794.993	170.546	258.635	380	308.721	1888.06	108.231	218.944	407.843	178.615	334.684
ENSCPOG00000000825	1219.5	983.693	1199.05	1224.89	1257.03	1085.43	1475.14	1293.38	1283.63	1199.42	1516.58	1254.62	1764.85	1275.15	1316.94	1698.37	1214.19	1277.67	1330.1	1838.63	1721.12	2005.45	1191.71
ENSCPOG00000000826	2405.42	2272.46	2307.34	2457.35	2293.79	2214.93	2678.16	1966.52	2512.74	2379.98	2654.25	2200.19	2247.97	2329.22	2466.63	1694.49	2474.73	2319.1	1980.43	1706.77	1848.36	1672.03	2049.7
ENSCPOG00000000830	3924.35	4025.05	4043.08	4029.1	3931.92	4571.27	4298.07	4187.8	3785.85	4145.89	3436.04	4074.95	4696.05	4476.84	3970.01	4388.09	4723.51	4334.44	4151.69	4944.89	4512.4	4532.84	5125.7
ENSCPOG00000000831	7.25891	0	16.5807	4.72567	0	0.831744	13.7436	0.979832	5.73903	4.48884	0	0	30.646	10.2644	31.9867	25.8503	17.3811	19.2856	21.836	27.368	9.08842	8.93073	2.90189
ENSCPOG00000000834	1182.29	1210.94	1269.73	1280.66	1292.88	1267.58	1205.77	1169.92	1156.41	1504.66	1264.89	1043.81	1541.31	1238.83	1303.23	1454.08	1339.17	1197.64	1085.15	1331.08	1401.89	1234.43	1260.39
ENSCPOG00000000836	0	63.2967	43.6335	74.6656	8.19576	21.6253	46.7281	75.4471	23.9126	22.4442	76.5204	151.455	18.0271	15.0018	31.9867	87.891	41.3835	11.5714	3.79756	9.95199	43.17	46.6383	46.4302
ENSCPOG00000000837	1655.03	2153.13	1462.59	1913.9	1703.69	2341.36	1779.33	1538.34	1685.36	1714.74	729.249	2077.39	1754.03	2192.62	2354.22	1292.52	1656.17	2030.78	1634.85	1332.32	1590.47	1530.13	1399.68
ENSCPOG00000000838	236.822	503.261	495.677	656.868	476.379	603.846	404.061	621.213	529.904	456.963	366.929	688.71	582.274	660.077	665.324	460.135	540.468	312.427	508.874	488.891	623.693	434.629	458.498
ENSCPOG00000000839	2559.67	3553.96	2798.65	2773.97	2848.03	3682.96	3837.2	3756.68	3460.64	3341.49	3011.96	3758.74	2786.98	3434.61	3059.76	2534.62	3152.59	3323.88	3987.44	3422.24	3564.93	2963.02	3485.17
ENSCPOG00000000840	581.62	524.014	614.36	534.946	486.623	506.532	721.079	639.83	602.598	579.958	759.673	539.302	648.974	563.75	601.35	639.795	480.048	474.426	541.153	588.411	620.285	606.297	571.672
ENSCPOG00000000844	0	12.4518	0	0	6.14682	5.82221	0.916238	0	0	0	171.48	0	0	0	43.8675	3.87755	12.415	23.1427	10.4433	7.46399	5.68026	0	0
ENSCPOG00000000846	318.484	392.232	299.326	263.692	269.436	276.971	273.039	267.494	329.994	281.899	181.621	334.633	292.038	283.454	293.364	374.829	298.789	297.963	262.981	315.976	304.462	276.853	256.333
ENSCPOG00000000847	176.936	81.9744	40.1428	41.5859	28.6852	10.8127	117.278	51.9311	146.345	29.6263	195.45	42.9804	41.4622	4.7374	16.4503	67.2108	44.6942	327.855	11.3927	29.856	30.6734	28.7768	29.9862
ENSCPOG00000000848	5352.54	5379.18	4667.04	4420.39	4659.29	5367.25	4571.11	4302.44	4775.83	4450.23	2984.3	5281.48	4912.37	4337.09	4734.95	5418.22	4228.56	4557.19	4967.21	4942.41	4786.19	5013.12	4383.79
ENSCPOG00000000849	9.07363	3.11295	5.23602	8.5062	6.14682	5.82221	7.3299	4.89916	6.69554	10.7732	15.6729	7.1634	3.60541	4.7374	7.31125	1.29252	5.79369	13.4999	7.59513	2.488	1.13605	0.992303	0
ENSCPOG00000000850	3056.91	3160.69	3647.76	3274.89	3385.87	3151.48	3293.87	3832.12	3729.41	3432.16	3709.86	2698.56	3805.51	2933.24	3389.68	4651.76	3388.48	3129.09	3693.13	4540.6	3718.3	3517.72	3422.29
ENSCPOG00000000854	2068.79	1627.04	1841.33	1535.84	1734.43	1582.81	1864.54	1386.46	1894.84	1749.75	1858.62	1860.44	1708.96	1679.41	1465.91	1978.84	1623.89	1690.38	1790.55	1849.83	1663.18	2104.68	1617.32
ENSCPOG00000000855	3.62945	0	0.87267	0	8.19576	5.82221	0	7.83866	10.5216	9.87544	23.9703	8.18675	5.40812	1.57913	0.913906	0	2.48301	3.85712	9.49391	11.196	7.95237	3.96921	7.73837
ENSCPOG00000000856	859.273	805.217	746.133	1039.65	680.248	893.293	592.806	984.731	727.901	870.834	511.673	1021.3	1014.92	1035.91	931.27	820.747	980.788	826.389	816.476	1125.82	974.733	733.312	779.641
ENSCPOG00000000859	0	0	0	0	2.04894	3.32698	0	0	0	0	5.5316	0	0	0.789566	0	0	0	3.85712	0	0	0	0	4.83648
ENSCPOG00000000860	169.677	118.292	124.792	155.002	186.454	200.45	106.284	140.116	113.824	135.563	139.212	112.568	243.365	176.073	191.006	99.5237	212.711	166.821	96.8379	131.864	188.585	144.876	138.323
ENSCPOG00000000862	3806.39	4221.16	4393.89	3961.06	4759.69	4566.28	3650.29	4448.44	3605.07	4531.03	3343.85	4495.55	4519.38	4536.06	4446.15	3218.36	4843.52	3917.87	4460.24	3857.64	3709.21	3818.38	3896.27
ENSCPOG00000000863	595.23	768.899	751.369	795.803	876.947	965.655	673.435	867.151	832.16	860.061	927.465	818.675	1018.53	978.272	1047.34	682.448	1027.97	961.388	880.086	840.943	1004.27	680.72	785.444
ENSCPOG00000000865	490.883	727.393	773.186	754.217	769.377	987.28	926.316	926.921	645.641	1022.56	654.572	849.375	668.804	960.902	839.88	854.353	699.381	617.14	905.719	890.703	700.945	741.251	561.032
ENSCPOG00000000866	6.35154	2.0753	3.49068	0	0	5.82221	0.916238	5.87899	1.91301	0	0	0	1.80271	1.57913	5.48344	0	2.48301	1.92856	0	0	7.95237	1.98461	8.70566
ENSCPOG00000000867	372.926	416.098	443.316	640.801	257.142	563.923	560.737	414.469	441.905	340.254	330.974	585.352	398.398	445.315	504.476	338.639	358.381	343.284	337.034	476.452	435.108	646.982	400.461
ENSCPOG00000000868	63.5154	2.0753	23.5621	17.9575	5.12235	24.1206	64.1366	131.297	113.824	7.18214	69.145	16.3735	9.01353	5.52696	16.4503	12.9252	19.0364	16.3928	22.7854	9.95199	12.4966	24.8076	24.1824
ENSCPOG00000000869	0	0	1.74534	1.89027	0	1.66349	0	3.91933	0.956505	0	1.84387	0	1.80271	0	3.65562	0	4.13835	6.74997	2.84817	2.488	2.27211	0.992303	1.93459
ENSCPOG00000000870	1502.59	1479.69	1550.73	1162.51	1564.37	1764.96	1680.38	1364.91	1834.58	1453.49	1030.72	1532.97	778.769	1403.85	1650.51	1075.37	1316.82	1547.67	1493.39	1215.39	955.42	1252.29	1637.63
ENSCPOG00000000872	164.233	185.74	197.223	218.326	324.757	263.663	212.567	118.56	114.781	269.33	158.572	319.283	302.855	281.875	350.026	168.027	280.58	230.463	210.765	192.82	257.884	283.799	235.053
ENSCPOG00000000873	2499.79	2109.54	1772.39	2778.69	1471.14	1647.69	2329.99	2004.74	1861.36	2055.89	3902.54	2561.43	2399.4	2176.83	2590.92	2524.28	1570.09	2275.7	1765.87	1776.43	2447.06	2206.88	2809.99
ENSCPOG00000000876	1018.97	1072.93	782.785	930.957	923.048	812.614	965.715	811.301	976.592	895.074	1438.22	1163.54	798.598	753.246	914.82	1106.39	790.424	947.888	513.621	1016.35	811.142	792.85	946.983
ENSCPOG00000000878	68.0522	139.045	66.3229	241.009	72.7374	117.276	100.786	186.168	98.52	126.585	96.803	25.5836	86.5299	102.644	90.4767	126.667	115.874	140.785	102.534	59.7119	139.735	96.2534	97.6969
ENSCPOG00000000884	178.751	227.246	368.267	383.724	295.047	332.698	261.128	355.679	329.038	304.343	237.859	251.743	306.46	349.778	347.284	239.115	364.175	371.248	324.692	238.848	378.306	331.429	265.039
ENSCPOG00000000885	124.309	183.664	187.624	194.698	117.814	179.657	191.494	197.926	213.301	269.33	183.465	172.945	239.76	195.023	180.953	288.231	192.847	242.999	199.372	267.46	213.578	168.692	200.23
ENSCPOG00000000886	178.751	102.727	241.73	60.4886	118.839	81.5109	82.4614	92.1042	54.5208	166.985	288.565	0	106.36	32.3722	134.344	82.721	281.408	233.356	154.751	119.424	98.8366	113.123	30.9535
ENSCPOG00000000887	1437.26	1026.24	950.338	930.957	1342.06	820.1	1188.36	935.74	1241.54	1051.29	1745.22	947.616	856.285	823.517	1000.73	987.482	900.505	1587.21	1060.47	934.243	803.189	987.342	1117.23
ENSCPOG00000000888	232.285	175.363	149.227	186.191	237.677	153.041	217.148	211.644	183.649	208.282	123.539	180.108	264.998	210.025	171.814	308.911	179.604	161.999	276.273	253.776	196.537	255.022	202.165
ENSCPOG00000000889	85.2921	149.422	217.295	202.259	96.3002	177.993	83.3776	155.793	76.5204	137.358	113.398	155.548	187.481	157.913	226.649	112.449	156.43	135.964	68.3562	73.3959	152.231	86.3304	113.174
ENSCPOG00000000890	85.2921	35.2801	27.9254	10.3965	25.6118	40.7555	74.2153	35.274	39.2167	6.28437	85.7398	31.7236	34.2514	11.0539	56.6622	47.8231	5.79369	43.3926	5.69635	69.6639	15.9047	33.7383	16.444
ENSCPOG00000000892	6739.89	7457.6	5601.67	5515.8	7766.51	6897.65	9465.65	9847.31	9207.32	5695.43	6141	9105.71	5310.77	7680.11	7158.63	6315.23	8955.38	10950.4	7363.48	7235.1	5905.2	5941.91	9495.94
ENSCPOG00000000893	10.8884	0	0	0	0	0	0	0	0	4.48884	2.7658	0	0	0	0.913906	0	0	3.85712	0	0	0	0	0
ENSCPOG00000000894	4916.09	5025.34	6079.02	6244.5	6170.39	5817.22	5625.7	6297.38	6006.85	5722.37	4625.34	6324.26	6356.34	6847.91	5524.56	5759.45	5403.85	5353.69	6161.55	6065.74	5880.21	5008.16	5188.58
ENSCPOG00000000895	21.7767	0	2.61801	16.0673	0	5.82221	0	0	4.78253	3.59107	0	0	1.80271	1.57913	6.39734	0	4.13835	0	0	4.97599	0	16.8692	0
ENSCPOG00000000897	46.2755	15.5648	10.472	14.177	0	4.15872	15.576	1.95966	40.1732	11.671	72.8327	0	1.80271	4.7374	0	32.3129	9.10437	27.9641	0.949391	3.732	1.13605	1.98461	0
ENSCPOG00000000898	14.5178	0	6.10869	16.0673	0	0.831744	10.0786	11.758	18.1736	0	94.9591	7.1634	1.80271	7.10609	9.13906	7.75509	0.82767	84.8567	0	2.488	5.68026	11.9076	5.80378
ENSCPOG00000000900	98.9026	171.212	109.956	249.515	92.2023	187.142	136.519	218.503	190.345	132.87	125.383	194.435	146.019	162.651	182.781	164.149	192.019	111.857	112.978	109.472	216.986	156.784	177.982
ENSCPOG00000000902	0	0	0	0.945134	0	0.831744	0	0	3.82602	0	0	0	0	0	0	0	0	4.8214	0	0	4.54421	0	0
ENSCPOG00000000903	878.328	1891.64	1623.17	1750.39	1616.61	2430.36	962.05	1983.18	1204.24	1579.17	838.959	1708.98	2008.21	2347.38	2099.24	1273.13	2162.7	1570.81	1913.97	1838.63	2330.04	1476.55	1542.84
ENSCPOG00000000904	4996.85	5051.29	6148.83	5876.84	5792.36	7212.89	4748.86	6476.69	4508.97	5986.31	4030.69	5508.66	8095.95	6622.09	6606.63	6297.13	5914.53	6072.08	5585.27	7136.82	7930.79	5900.24	5751.54
ENSCPOG00000000906	8.16627	8.30121	38.3975	30.2443	24.5873	28.2793	18.3248	36.2538	11.4781	22.4442	17.5167	39.9104	39.6595	24.4765	30.1589	19.3877	28.1408	22.1785	15.1903	42.296	43.17	30.7614	12.5748
ENSCPOG00000000907	45.3682	50.8449	54.1055	60.4886	91.1779	59.8856	78.7964	84.2656	44.9557	57.4571	89.4275	62.424	28.8433	78.9566	63.0595	100.816	36.4175	88.7138	69.3056	69.6639	38.6258	53.5844	65.7761
ENSCPOG00000000908	3813.65	4643.49	4173.98	4982.74	4807.84	5106.08	3523.85	5910.35	4578.79	4763.55	5092.76	3917.36	5941.72	5327.2	4928.7	4429.45	4798	4206.19	4367.2	4738.39	5635.96	5076.62	4726.21
ENSCPOG00000000909	0	0	3.49068	2.8354	7.17129	3.32698	10.9949	0	0	0	10.1413	0	3.60541	3.15826	3.65562	0	4.96602	5.78569	4.74696	0	7.95237	0	6.77107
ENSCPOG00000000910	2.72209	0	0	0.945134	0	1.66349	1.83248	1.95966	0.956505	0.897767	1.84387	1.02334	3.60541	0	0	5.17006	0	0	0.949391	6.21999	2.27211	2.97691	0
ENSCPOG00000000911	0	5.18826	0	0	0	4.15872	0	0	3.82602	0	0	0	0	0	0	0	1.65534	0	0	1.244	0	0	0
ENSCPOG00000000912	20242.4	22746.4	33001.8	25925	27185.3	39542.8	18563.9	33919.8	16417.5	24462.4	11569.3	32345.8	30874.9	42321.5	30729.2	13981.1	34589.1	27198.5	37633.9	28220.1	25700.9	26379.4	33129.9
ENSCPOG00000000914	228.656	353.839	219.04	275.034	248.946	271.98	273.955	235.16	330.951	233.419	224.03	252.766	351.528	250.292	201.973	426.53	268.993	320.141	250.639	375.688	340.816	414.783	282.45
ENSCPOG00000000919	183.287	148.384	119.556	109.636	92.2023	104.8	100.786	86.2252	95.6505	96.9589	118.007	128.941	156.835	98.6957	79.5098	137.007	87.733	80.9996	89.2428	100.764	161.32	101.215	99.6315
ENSCPOG00000000920	127.031	93.3886	88.1397	81.2815	59.4193	53.2316	79.7127	43.1126	84.1725	131.074	153.963	125.871	72.1082	33.9513	57.5761	74.9659	28.1408	121.499	63.6092	54.7359	31.8095	82.3612	40.6264
ENSCPOG00000000921	529.9	1347.91	1213.01	1116.2	1245.76	1250.11	1039.01	1232.63	1196.59	1040.51	1126.6	1016.18	1665.7	1497.02	1380	867.278	1326.75	929.567	908.567	1018.83	1382.58	992.303	942.146
ENSCPOG00000000922	200.527	142.158	287.108	206.039	315.537	316.063	202.489	187.148	162.606	210.975	164.104	194.435	160.441	176.073	196.49	223.605	157.257	216.963	171.84	179.136	145.415	135.946	203.132
ENSCPOG00000000923	1481.72	2364.81	2512.42	2794.76	2635.96	3104.9	1732.61	3033.56	2109.09	2900.69	2076.19	2671.95	3205.21	2995.61	2877.89	2259.32	2962.23	2476.27	2671.59	2369.82	2649.28	2237.64	2374.71
ENSCPOG00000000924	1200.44	1069.82	1169.38	1169.13	1069.55	1028.87	1388.1	916.143	1198.5	1126.7	2448.65	934.313	1294.34	784.829	1011.69	1558.77	754.835	989.352	942.745	1250.22	933.835	1112.37	1094.98
ENSCPOG00000000925	380.185	681.737	593.416	585.983	543.994	519.008	451.705	637.871	675.293	478.51	484.015	593.539	268.603	516.376	494.423	372.244	602.543	536.14	459.505	374.444	466.918	403.867	557.162
ENSCPOG00000000927	1028.04	1552.33	1295.91	1392.18	1310.3	1680.12	907.075	1709.81	899.115	1350.24	546.706	1393.79	1032.95	1938.38	1766.58	853.06	1739.76	1411.71	1591.18	1030.03	975.869	1214.58	1527.36
ENSCPOG00000000931	890.123	1516.01	1411.11	1402.58	1331.81	1668.48	1179.2	1532.46	1363.98	1574.68	927.465	1425.52	1898.25	1699.94	1646.86	1234.35	1648.72	1464.74	1581.69	1633.37	1924.47	1359.46	1626.02
ENSCPOG00000000932	773.981	938.037	1056.8	1153.06	1132.04	1123.69	1024.35	1227.73	766.161	890.585	672.089	1205.5	731.898	1162.24	1167.06	681.156	1258.06	934.388	1136.42	492.623	700.945	740.258	874.436
ENSCPOG00000000933	1073.41	1070.86	1107.42	1367.61	1115.65	1390.68	868.593	1178.74	990.939	1186.85	810.379	1102.14	1867.6	1297.26	1330.65	1198.16	1539.47	1220.78	1140.22	1390.79	1567.75	1387.24	1212.99
ENSCPOG00000000934	178.751	363.178	300.198	344.974	246.897	351.828	277.62	355.679	260.169	389.631	222.186	327.47	396.595	360.832	310.728	385.17	393.971	212.142	267.728	347.076	478.278	323.491	279.549
ENSCPOG00000000935	411.943	880.966	540.183	538.726	537.847	640.443	326.181	700.58	562.425	498.261	633.368	519.858	856.285	630.074	592.211	643.673	792.907	585.318	570.584	595.875	778.196	585.459	487.517
ENSCPOG00000000937	0	23.866	0	1.89027	0	0	7.3299	13.7176	0	4.48884	0	22.5136	3.60541	28.4244	19.192	9.04761	13.2427	13.4999	5.69635	6.21999	3.40816	8.93073	6.77107
ENSCPOG00000000938	1.81473	0	38.3975	2.8354	1.02447	4.15872	0	0	32.5212	0.897767	15.6729	1.02334	0	2.3687	0.913906	0	21.5194	1.92856	0.949391	0	0	0	5.80378
ENSCPOG00000000940	1127.85	1561.66	1171.12	1581.21	1534.66	1655.17	1063.75	1387.44	1174.59	1440.02	1093.41	1701.82	1436.76	1588.61	1605.73	1218.84	1848.19	1258.39	1305.41	1341.03	1442.79	1408.08	1493.5
ENSCPOG00000000945	19.0546	53.9579	0	31.1894	29.7096	16.6349	19.241	75.4471	8.60855	7.18214	0	121.778	7.21082	108.96	1.82781	0	16.5534	50.1426	21.836	33.588	55.6666	53.5844	40.6264
ENSCPOG00000000948	2404.51	2351.32	2049.9	2369.45	2530.44	1973.73	2219.13	2476.04	2646.65	2138.48	2405.32	2587.01	2608.51	2370.28	2278.37	2684.55	2592.26	3062.56	2456.08	2912.2	2835.59	2656.4	2425.98
ENSCPOG00000000950	249.525	480.432	404.919	341.193	302.219	454.132	451.705	433.086	415.123	316.014	383.524	351.007	288.433	437.42	363.735	420.068	373.279	423.319	331.338	364.492	468.054	300.668	360.801
ENSCPOG00000000952	36.2945	47.732	41.8882	40.6407	54.2969	41.5872	34.817	35.274	36.3472	28.7285	18.4387	88.0075	32.4487	41.0574	31.9867	28.4353	42.2111	42.4284	47.4696	60.9559	57.9387	31.7537	28.0516
ENSCPOG00000000954	1.81473	0	2.61801	0	0	0	7.3299	0.979832	3.82602	0	1.84387	2.04669	1.80271	1.57913	0	3.87755	5.79369	6.74997	0	0	0	0	0
ENSCPOG00000000955	5150.19	4435.96	4456.73	4866.49	5497.31	4636.97	6177.27	4805.1	2832.21	3940.3	3736.59	5464.65	4870.91	5350.1	4304.5	5203.67	4639.09	5968.9	6107.43	7104.48	5356.49	6388.45	5221.46
ENSCPOG00000000958	513.568	445.152	587.307	630.404	789.867	748.57	692.676	648.649	552.86	849.288	568.833	593.539	713.871	837.729	859.986	559.659	595.094	654.747	695.904	674.247	616.877	739.266	702.257
ENSCPOG00000000959	1517.11	2269.34	1994.92	1706.91	2155.49	1755.81	1513.62	1563.81	2190.4	1776.68	2348.16	1994.5	2626.54	1849.16	1762.01	2566.94	1998.82	1823.46	1843.72	1883.41	2377.76	2244.59	1712.11
ENSCPOG00000000961	2223.95	1547.14	1752.32	1826	1866.59	1633.55	1805.9	1777.42	1762.84	1824.26	1827.27	1913.65	1941.51	1833.37	1854.32	2176.6	1613.13	1730.88	1938.66	2223.03	1988.09	1885.38	1842.7
ENSCPOG00000000962	2007.09	2072.19	2605.79	2739	2629.82	2915.26	2306.17	3134.48	2654.3	2985.08	3210.17	2215.54	2832.05	2723.21	3166.68	2803.47	2574.05	3195.63	2600.38	2960.72	2733.34	2469.84	2878.67
ENSCPOG00000000965	782.147	825.97	925.03	934.737	823.674	817.605	984.956	941.619	719.292	957.918	1109.09	625.263	1200.6	986.168	906.595	977.142	822.704	708.746	873.44	1252.71	1120.15	986.35	947.95
ENSCPOG00000000967	3321.86	3372.37	2609.28	2652.99	2864.42	2695.68	2916.38	2920.88	2856.12	2906.97	3011.03	2945.18	3001.5	2573.2	2900.74	3588.02	2593.09	2779.06	2782.67	3175.93	2857.17	3436.35	2786.78
ENSCPOG00000000968	204.157	291.58	262.674	399.792	351.393	324.38	280.369	459.541	269.734	321.401	173.323	301.886	474.112	405.837	382.013	286.938	441.976	304.713	340.831	325.928	443.061	355.245	289.221
ENSCPOG00000000969	130.66	30.0919	5.23602	0	1.02447	5.82221	0	6.85882	0	10.7732	82.052	6.14006	0	0	0	0	1.65534	60.7497	9.49391	0	1.13605	0	1.93459
ENSCPOG00000000970	818.442	1055.29	972.154	1063.28	918.95	867.509	757.729	847.555	886.68	764.898	719.108	1199.36	712.069	911.159	762.198	847.89	1051.14	887.138	907.618	808.599	802.053	791.858	828.973
ENSCPOG00000000971	446.423	683.812	559.381	480.128	585.997	593.034	353.668	631.012	579.642	573.673	317.145	558.746	708.463	544.801	520.013	626.87	497.429	556.39	708.246	529.943	593.02	678.736	611.331
ENSCPOG00000000974	692.318	343.463	698.136	460.28	883.094	746.075	600.136	882.829	409.384	535.967	488.625	504.508	346.119	540.063	490.768	299.864	607.509	459.962	664.574	303.536	385.122	579.505	517.503
ENSCPOG00000000975	24.4988	29.0542	73.3043	95.4585	89.1289	66.5395	68.7178	101.903	37.3037	69.1281	100.491	78.7974	135.203	82.9044	106.013	71.0883	96.0097	79.071	64.5586	95.7879	164.728	69.4612	59.9724
ENSCPOG00000000976	6.35154	18.6777	4.36335	1.89027	1.02447	6.65395	0.916238	0	25.8256	0	27.658	0	1.80271	6.31653	1.82781	0	7.44903	9.64281	0	0	2.27211	0.992303	0
ENSCPOG00000000977	230.47	189.89	276.636	187.136	393.397	278.634	212.567	194.987	137.737	126.585	146.587	222.066	187.481	161.861	180.953	138.299	236.714	145.606	155.7	78.3719	117.013	122.053	103.501
ENSCPOG00000000980	259.506	125.556	99.4844	0	9.22023	53.2316	32.9846	68.5882	85.129	58.3549	212.967	20.4669	106.36	27.6348	36.5562	146.054	97.665	162.963	18.9878	51.0039	39.7619	123.046	58.0378
ENSCPOG00000000984	2251.17	1823.15	1619.68	1483.86	1541.83	1557.86	1638.23	1485.43	1882.4	1350.24	2091.87	1795.97	1144.72	1345.42	1346.18	1755.24	1582.5	1484.99	1577.89	1515.19	1315.55	1614.48	1565.08
ENSCPOG00000000986	1912.72	1365.55	1514.08	1720.14	1723.16	1280.89	1601.58	1568.71	1454.84	1303.56	1369.99	1696.7	1137.51	1395.95	1548.16	1779.79	1377.24	1970.99	1958.59	1912.03	1877.9	1318.77	1553.48
ENSCPOG00000000987	568.009	735.695	1253.15	1059.49	967.1	1028.04	814.535	1253.21	693.466	939.064	694.216	830.955	1081.62	1149.61	1085.72	907.346	1163.7	994.174	1073.76	1117.11	1288.28	863.304	946.983
ENSCPOG00000000988	3529.64	3911.94	3669.58	3476.2	3539.55	3565.69	4200.95	3992.82	4465.92	4137.81	5070.63	3563.28	3928.1	3156.68	3991.94	4397.14	3366.13	3749.12	4166.88	4437.34	4263.61	4244.08	4249.33
ENSCPOG00000000989	675.078	709.753	363.031	421.53	421.057	504.869	455.37	431.126	518.426	428.235	343.881	963.99	281.222	555.065	424.052	328.299	359.209	749.246	606.661	466.5	524.856	569.582	563.934
ENSCPOG00000000990	447.33	399.496	279.254	218.326	260.216	375.948	286.782	207.724	343.385	237.908	142.9	414.454	187.481	215.552	235.788	258.503	251.612	321.106	300.008	235.116	155.639	323.491	274.712
ENSCPOG00000000991	541.696	526.089	994.844	863.852	1032.67	857.528	616.628	987.671	697.292	1100.66	965.264	802.301	998.699	1152.77	1082.98	602.312	1226.61	917.031	871.541	808.599	975.869	877.196	864.763
ENSCPOG00000000992	1733.97	1436.11	1619.68	1584.04	1488.56	2224.08	1485.22	1672.57	1451.02	1846.71	1178.23	2069.2	2368.75	2225.79	1974.95	1203.33	1982.27	2024.99	1362.38	1923.22	2239.16	1885.38	1910.41
ENSCPOG00000000993	264.95	173.288	267.037	213.6	230.506	170.508	210.735	432.106	264.952	196.611	408.416	418.547	259.59	158.703	213.854	111.156	267.337	245.892	191.777	130.62	266.972	120.069	203.132
ENSCPOG00000000997	0	60.1838	14.8354	21.7381	20.4894	34.1015	27.4871	29.395	16.2606	1.79553	0	50.1438	30.646	42.6366	14.6225	9.04761	10.7597	43.3926	17.089	36.076	31.8095	34.7306	23.2151
ENSCPOG00000000998	3330.02	4751.4	2941.77	2813.66	3085.71	3035.03	2462.85	2935.58	3799.24	2689.71	3074.65	3868.24	2705.86	2643.47	2424.59	3865.91	2754.48	3550.48	2727.6	3093.82	3054.85	3134.69	3315.89
ENSCPOG00000000999	6.35154	0	0	0	0	0	0	0	0	0	0	0	0	0	0.913906	5.17006	0	0	0	0	0	2.97691	0
ENSCPOG00000001000	1557.94	1149.72	1153.67	1188.03	1165.85	1090.42	1021.61	1226.75	1251.11	1231.74	1692.67	1367.19	1220.43	1086.44	1103.08	1323.54	1096.66	1227.53	1225.66	1272.61	1147.41	1295.95	1289.41
ENSCPOG00000001002	46.2755	74.7109	37.5248	50.0921	34.832	58.2221	101.702	41.1529	63.1293	46.6839	161.338	49.1205	77.5163	65.534	85.9072	62.0407	41.3835	53.0354	71.2043	93.2999	93.1563	82.3612	88.9912
ENSCPOG00000001005	168.77	76.7862	109.084	41.5859	103.472	114.781	113.613	84.2656	77.4769	55.6616	105.1	101.311	43.2649	95.5375	66.7151	68.5033	67.8689	68.4639	57.9129	55.9799	76.1155	71.4458	101.566
ENSCPOG00000001006	150.622	32.1672	0.87267	23.6283	46.1012	4.99046	25.6547	49.9714	18.1736	35.9107	216.654	27.6303	0	0.789566	5.48344	3.87755	1.65534	104.142	17.089	4.97599	2.27211	3.96921	0
ENSCPOG00000001007	189.639	234.509	89.885	169.179	65.5661	122.266	108.116	109.741	38.2602	98.7544	158.572	88.0075	79.319	92.3792	139.828	121.496	116.701	53.9997	94.9391	119.424	74.9795	68.4689	107.37
ENSCPOG00000001008	2175.86	1617.7	1947.8	1922.4	1794.87	2097.66	2179.73	1727.44	1577.28	1815.29	1177.31	2143.9	856.285	2232.89	1836.95	1049.52	2018.69	1856.24	2022.2	1353.47	1044.03	1238.39	2029.39
ENSCPOG00000001009	1032.58	754.372	740.024	664.429	786.793	649.592	803.54	645.709	777.639	654.472	876.758	852.445	483.125	694.028	679.946	767.754	638.961	722.246	767.108	762.571	627.101	724.381	826.071
ENSCPOG00000001010	1233.11	1403.94	1190.32	1140.78	1226.29	1180.24	1345.95	1414.88	1464.41	1126.7	1562.68	1297.6	1461.99	1384.9	1398.28	1298.98	1536.98	1032.74	1528.52	1411.94	1488.23	1297.93	1390
ENSCPOG00000001012	10552.6	11386.1	15979.5	11163.9	17600.4	17127.3	14647.9	12628.1	11914.2	17952.7	8701.2	8881.6	20882.5	11898	11821.4	15130.2	15603.2	11458.5	13021.8	18335.3	15590.1	18935.1	10531.9
ENSCPOG00000001013	36.2945	12.4518	26.1801	51.9824	11.2692	64.0443	42.1469	19.5966	34.4342	25.1375	22.1264	22.5136	45.0676	42.6366	17.3642	12.9252	42.2111	33.7498	22.7854	8.70799	26.1292	61.5228	37.7245
ENSCPOG00000001014	3869.9	3181.44	3312.66	3122.72	3414.56	2741.43	4218.36	3415.69	3481.68	3617.1	6149.29	2260.57	2779.77	2348.17	2802.04	4095.98	2364.65	2986.38	3312.43	2766.65	2310.73	3045.38	3520.96
ENSCPOG00000001016	1138.74	807.293	894.487	978.213	942.513	800.97	978.542	879.889	818.769	1007.29	1098.02	686.663	845.469	964.06	1002.55	928.026	883.123	983.566	1016.8	869.555	719.121	892.081	977.936
ENSCPOG00000001018	0	0	6.98136	0	0	0	0	1.95966	0	0	0	0	0	0.789566	0	0	0	2.89284	1.89878	0	0	0	0
ENSCPOG00000001019	2264.78	1152.83	1528.05	1338.31	1664.76	1138.66	1612.58	1434.47	1894.84	1396.93	2643.18	1393.79	959.039	1196.19	1348.93	1288.64	1156.25	1662.42	1456.37	1268.88	946.332	1005.2	1607.65
ENSCPOG00000001020	139.734	269.789	303.689	275.979	318.61	299.428	259.295	260.635	315.647	245.09	283.955	217.972	364.146	272.4	275.086	305.034	339.345	319.177	288.615	268.704	321.503	208.384	234.086
ENSCPOG00000001021	746.76	672.398	718.207	829.827	679.224	504.869	548.826	631.012	486.861	634.721	430.543	960.92	621.933	701.924	707.363	529.931	523.087	651.854	801.286	767.547	670.271	442.567	682.911
ENSCPOG00000001023	745.853	936.999	942.484	1068	787.818	963.991	809.954	1024.9	678.162	1037.82	940.372	1106.23	968.053	1076.18	1018.09	763.877	1301.92	1118.57	781.349	829.747	1412.11	1086.57	1011.79
ENSCPOG00000001024	1265.77	1503.56	1215.63	775.955	854.408	1309.17	1013.36	1289.46	931.636	859.163	851.866	1154.33	589.485	972.745	1084.81	759.999	1112.39	969.102	1209.52	951.659	796.373	770.027	1273.93
ENSCPOG00000001027	478.18	538.541	636.176	464.061	740.692	587.211	612.963	527.15	439.036	585.344	536.565	499.392	319.079	600.86	569.363	345.102	565.298	566.997	544.001	370.712	323.775	477.298	676.14
ENSCPOG00000001029	1028.95	1472.43	1606.59	1805.21	1295.96	1218.51	1035.35	1665.71	1439.54	1376.28	578.052	1261.78	1215.02	1617.03	1537.19	877.618	1394.62	1133.99	1763.02	1038.74	1107.65	1160.99	1182.04
ENSCPOG00000001030	484.532	571.746	637.922	773.119	705.86	838.398	617.544	924.961	576.773	708.338	831.584	527.022	1471.01	749.298	779.562	1067.62	779.665	908.353	780.4	1360.93	1391.66	1047.87	734.178
ENSCPOG00000001031	7.25891	5.18826	4.36335	3.78053	0	7.4857	6.41366	7.83866	6.69554	0.897767	3.68773	5.11672	0	0	1.82781	5.17006	7.44903	19.2856	4.74696	6.21999	2.27211	1.98461	9.67296
ENSCPOG00000001032	1641.42	997.183	1397.14	1149.28	1467.04	1304.17	1176.45	1118.97	1058.85	1422.96	974.483	1135.91	825.639	1148.82	1219.15	1015.92	1334.2	1084.82	1307.31	990.223	829.319	1188.78	1084.34
ENSCPOG00000001034	8662.6	6546.54	7395.88	7090.39	7246.08	7680.33	8356.09	7277.21	6959.53	7549.32	7346.88	7758.99	6235.56	8261.23	7678.64	5913.26	7688.22	7575.39	7407.15	6379.23	6113.1	7375.79	7312.76
ENSCPOG00000001035	29.943	26.9789	29.6708	27.4089	23.5628	24.1206	39.3982	25.4756	28.6952	34.1152	37.7993	19.4435	66.7001	30.7931	33.8145	49.1156	31.4514	28.9284	36.0769	53.4919	42.034	65.492	33.8554
ENSCPOG00000001037	151.53	108.953	261.801	217.381	232.555	95.6506	297.777	237.119	208.518	337.56	223.108	386.824	326.29	176.863	259.549	85.306	268.165	194.785	160.447	293.584	235.163	320.514	252.464
ENSCPOG00000001038	6125.61	5312.77	5264.82	4899.57	5834.36	5639.23	6058.16	4492.53	5673.03	5004.15	3701.56	6154.39	3461.19	5269.56	5218.4	4778.43	4404.86	4690.26	5764.7	3358.8	2984.41	4448.5	5224.37
ENSCPOG00000001039	0	0	2.61801	0	1.02447	0	0	0	0	7.18214	68.223	0	18.0271	1.57913	8.22515	0	1.65534	13.4999	0	2.488	3.40816	4.96152	0
ENSCPOG00000001041	466.385	582.122	603.015	541.562	650.539	548.119	438.878	601.617	630.337	459.657	436.074	629.356	492.139	543.221	534.635	550.612	605.854	576.64	539.254	517.503	529.401	627.136	618.102
ENSCPOG00000001043	1635.98	1217.16	1396.27	1553.8	1665.79	1394	1775.67	1441.33	1583.02	1878.13	2479.08	1328.3	1739.61	1467.01	1427.52	1518.71	1501.39	1262.24	1355.73	1367.15	1321.23	1639.29	1433.53
ENSCPOG00000001046	1802.93	1622.89	1768.03	1605.78	2121.68	1962.08	1571.35	1786.23	1265.46	2080.13	1884.43	1600.51	1909.07	2096.3	1832.38	1952.99	1384.69	1759.81	1889.29	1704.28	1356.45	2011.4	1739.2
ENSCPOG00000001047	1498.96	1099.91	1318.6	1212.61	1274.44	1243.46	1689.54	1197.35	1401.28	1448.1	2303.91	1175.82	1370.06	1183.56	1279.47	1835.37	1296.96	1176.42	1275.98	1379.59	1306.46	1517.23	1256.52
ENSCPOG00000001048	97.0879	15.5648	25.3074	43.4761	16.3915	7.4857	58.6392	10.7782	128.172	42.1951	36.8773	62.424	23.4352	48.9531	43.8675	10.3401	24.0024	18.3213	40.8238	12.44	27.2653	18.8538	34.8227
ENSCPOG00000001049	64.4228	98.5769	63.7049	53.8726	56.3459	61.5491	47.6444	57.8101	48.7818	75.4124	25.8141	63.4473	32.4487	62.3757	62.1456	33.6054	108.425	57.8569	69.3056	34.832	44.3061	55.569	63.8415
ENSCPOG00000001050	12.7031	0	6.10869	0	2.04894	14.9714	3.66495	0	7.65204	8.0799	6.45353	19.4435	0	7.10609	5.48344	5.17006	4.96602	4.8214	7.59513	4.97599	0	3.96921	1.93459
ENSCPOG00000001051	1312.05	1613.55	1672.04	1613.34	1675.01	1591.13	1481.56	1785.25	1559.1	1438.22	1755.36	1725.36	1597.2	2075.77	1709	1467	1503.88	1613.24	1529.47	1501.51	1521.17	1445.79	1784.66
ENSCPOG00000001052	558.028	613.252	796.748	1036.81	804.209	848.379	658.775	851.474	816.856	984.851	748.61	683.593	1593.59	1022.49	1095.77	792.312	744.903	798.425	650.333	1108.4	1505.27	916.888	1019.53
ENSCPOG00000001053	3106.81	3045.51	2492.35	2359.05	2419.8	2678.22	2296.09	2399.61	2755.69	2224.67	2121.37	2891.97	1966.75	2401.07	2375.24	2510.06	2647.71	2657.56	2929.82	2446.95	2331.18	2570.07	2765.5
ENSCPOG00000001054	80371.5	62178.1	84186.5	84269.1	79909.7	74560	92805.7	90811.8	63453.6	78728.8	65156.7	99557	73099.7	75841	77364	63731.3	94375	87138.2	95311.3	79253.9	80942.6	84780.4	90956.8
ENSCPOG00000001055	2575.1	2063.89	3229.75	2554.7	3184.05	2866.19	2807.35	2270.27	1912.05	3316.35	3125.35	2254.43	3288.13	2985.35	2614.69	2628.98	2402.72	2984.45	3322.87	2867.42	2733.34	3428.41	2939.61
ENSCPOG00000001057	0	0	0	0	0	0	0	0	1.91301	0	11.0632	0	0	0	0	0	1.65534	8.67853	0	0	0	0	0
ENSCPOG00000001058	951.824	983.693	1181.6	1058.55	858.506	1149.47	1055.51	968.074	827.377	1253.28	1523.96	922.032	1164.55	1006.7	1039.11	1198.16	1097.49	970.067	769.956	1124.57	1114.47	1001.23	957.623
ENSCPOG00000001061	201.435	212.718	157.081	113.416	98.3492	137.238	171.336	198.906	186.519	146.336	136.446	180.108	100.952	119.224	108.755	165.442	134.91	191.892	202.22	155.5	156.775	187.545	207.969
ENSCPOG00000001062	0	0	1.74534	2.8354	3.07341	0	0	0	3.82602	3.59107	0	0	0	0	0	1.29252	0	0	0.949391	3.732	2.27211	0	1.93459
ENSCPOG00000001063	186.009	301.956	199.841	166.344	235.628	235.384	175.001	273.373	186.519	179.553	68.223	260.953	241.563	164.23	227.563	164.149	249.129	232.392	206.018	217.7	226.075	124.038	158.637
ENSCPOG00000001064	615.192	1169.43	810.71	593.544	654.637	811.782	504.847	1014.13	668.597	691.281	409.338	874.959	564.247	904.053	920.303	568.707	813.599	663.425	910.466	694.151	746.387	674.766	794.15
ENSCPOG00000001066	1092.47	1087.46	1003.57	986.72	734.545	799.306	1024.35	1008.25	1265.46	1058.47	1402.26	1322.16	924.788	843.256	908.423	1067.62	969.201	987.424	895.276	900.655	903.162	1128.25	1077.57
ENSCPOG00000001068	750.389	1005.48	980.008	929.066	1020.37	1000.59	714.665	984.731	1024.42	856.47	811.301	974.223	978.869	1136.19	1052.82	1065.03	1065.21	800.353	941.796	1093.47	1082.66	964.519	1042.75
ENSCPOG00000001069	3983.32	2519.42	2764.62	2724.82	3631.75	3213.86	3070.31	3206.01	2459.18	4178.21	2469.86	2720.05	2963.65	3576.73	3633.69	2617.34	3468.76	3689.34	3716.87	2935.84	2260.75	2484.73	3364.26
ENSCPOG00000001072	15.4252	5.18826	3.49068	7.56107	17.416	11.6444	22.9059	2.9395	3.82602	0	7.37546	8.18675	3.60541	12.6331	2.74172	0	4.96602	1.92856	9.49391	9.95199	3.40816	0.992303	7.73837
ENSCPOG00000001074	1498.96	1331.31	1318.6	1327.91	1636.08	1487.16	1457.73	1617.7	1623.19	1231.74	862.929	1471.57	692.239	1442.54	1141.47	915.101	1315.17	1378.92	1569.34	879.507	856.584	923.834	1425.79
ENSCPOG00000001076	13.6104	6.22591	0.87267	1.89027	6.14682	0	9.16238	5.87899	0	6.28437	21.2045	9.21009	7.21082	11.8435	2.74172	0	5.79369	7.71425	2.84817	11.196	0	0.992303	2.90189
ENSCPOG00000001079	3674.82	4268.9	4349.39	4486.55	4649.05	4423.22	4200.95	4819.79	4156.02	4463.7	3816.8	4362.51	5613.62	5197.71	4946.06	4927.07	4743.37	4378.8	4715.63	5049.39	5127.01	5445.76	4557.9
ENSCPOG00000001080	685.967	1150.76	1240.94	1350.6	1375.86	1627.72	979.458	1191.48	1217.63	1206.6	972.639	1262.81	1530.5	1609.14	1399.19	1138.71	1903.64	1287.31	1178.19	1224.09	1272.38	1302.89	1254.58
ENSCPOG00000001082	11.7957	0	0	0	0	0	0	0	2.86952	8.97767	33.1896	0	0	1.57913	6.39734	7.75509	0	4.8214	0	1.244	11.3605	0	0
ENSCPOG00000001083	0	5.18826	0	0	0	0.831744	2.74871	0	1.91301	0.897767	13.829	6.14006	0	0	0	0	3.31068	4.8214	0	0	1.13605	0.992303	0
ENSCPOG00000001085	0	0	0	0	0	0	3.66495	0	0.956505	0	3.68773	0	0	0	0.913906	0	0	4.8214	0	0	0	0	0
ENSCPOG00000001087	311.226	326.86	400.556	292.991	393.397	272.812	375.657	245.938	320.429	345.64	405.651	270.163	178.468	303.193	314.384	204.217	309.548	421.391	317.097	227.652	171.544	243.114	328.881
ENSCPOG00000001094	594.323	696.264	394.447	714.521	461.012	646.265	586.392	381.155	1625.1	923.802	820.52	886.215	255.984	861.416	695.483	487.278	528.881	771.425	1175.35	671.759	913.387	318.529	624.873
ENSCPOG00000001095	3.62945	3.11295	7.85403	0	0	0.831744	0	0	41.1297	17.0576	0	0	0	1.57913	10.9669	0	11.5874	74.2496	3.79756	17.416	2.27211	15.8769	1.93459
ENSCPOG00000001096	13.6104	16.6024	2.61801	15.1221	6.14682	14.1397	2.74871	12.7378	12.4346	13.4665	11.9851	6.14006	7.21082	8.68523	10.9669	16.8027	8.2767	9.64281	10.4433	6.21999	4.54421	7.93843	11.6076
ENSCPOG00000001099	783.962	417.136	534.074	413.969	451.791	582.221	557.073	621.213	681.032	558.411	476.639	401.151	427.241	542.432	440.503	540.271	630.684	571.819	706.347	603.339	583.931	488.213	403.362
ENSCPOG00000001101	1765.73	1299.14	906.704	1444.16	1145.36	840.893	1276.32	948.477	1420.41	1221.86	988.312	969.106	832.85	1011.43	1104.91	1190.41	1211.71	828.317	1495.29	742.667	661.183	675.759	938.277
ENSCPOG00000001102	9.981	13.4895	0	0	7.17129	6.65395	5.49743	0.979832	3.82602	2.6933	7.37546	7.1634	9.01353	0.789566	1.82781	1.29252	0	5.78569	0	1.244	6.81632	6.94612	3.86918
ENSCPOG00000001103	3.62945	29.0542	11.3447	2.8354	15.3671	2.49523	16.4923	7.83866	23.9126	2.6933	1.84387	2.04669	1.80271	20.5287	14.6225	2.58503	10.7597	3.85712	0	3.732	7.95237	20.8384	3.86918
ENSCPOG00000001104	245.895	151.497	241.73	223.052	279.68	174.666	242.803	219.482	216.17	248.682	153.041	184.202	169.454	312.668	277.827	183.537	240.024	238.177	275.323	148.036	220.394	223.268	226.347
ENSCPOG00000001105	191.454	268.752	105.593	218.326	192.6	128.089	170.42	179.309	155.91	142.745	334.662	331.563	203.706	206.866	216.596	108.571	141.531	292.177	245.892	344.588	236.299	156.784	307.6
ENSCPOG00000001106	2151.36	2085.68	2982.79	2601.01	2579.62	3002.6	2087.19	2410.39	2015.36	2497.59	1947.12	2089.67	2130.8	2905.6	2562.59	1861.22	2594.74	2350.92	2848.17	2291.45	2008.54	2440.07	2292.49
ENSCPOG00000001107	9130.8	8523.27	6630.55	4909.97	6138.63	7884.1	6666.55	5934.84	6466.93	6584.22	4920.36	6063.31	6096.75	9166.07	6522.55	5100.27	6407.82	7547.43	7495.44	6733.76	5125.87	5849.63	7231.5
ENSCPOG00000001112	745.853	788.615	755.732	735.314	920.999	934.88	490.187	878.909	799.638	820.559	702.513	834.025	908.564	987.747	1029.97	522.176	779.665	831.21	782.298	955.391	881.577	807.735	638.415
ENSCPOG00000001113	626.988	734.657	884.015	937.573	916.901	689.516	764.142	877.929	615.989	822.355	838.037	902.589	883.326	909.58	721.986	912.516	782.975	686.568	897.175	885.727	858.856	1004.21	722.57
ENSCPOG00000001114	0	4.1506	0	0	0	0.831744	8.24614	0	0	0	27.658	17.3968	0	0	0	11.6326	1.65534	17.3571	0	0	5.68026	0.992303	0.967296
ENSCPOG00000001115	4851.67	2840.05	3326.62	2934.64	4203.4	3288.72	3415.73	2910.1	3034.03	3180.79	2202.5	3701.43	2253.38	3145.63	2982.08	3201.56	3361.99	2791.59	4625.43	3076.41	2160.77	4041.65	3203.68
ENSCPOG00000001117	1143.28	1062.55	1628.4	1506.54	1678.08	1770.78	986.788	1122.89	889.55	1637.53	625.993	980.363	1611.62	1840.48	1558.21	909.931	1682.65	1067.46	1505.73	1188.02	1582.52	981.388	1323.26
ENSCPOG00000001120	0.907363	18.6777	13.0901	2.8354	21.5139	6.65395	6.41366	1.95966	50.6948	26.0352	9.21933	6.14006	1.80271	3.94783	10.053	7.75509	5.79369	10.6071	4.74696	13.684	27.2653	8.93073	20.3132
ENSCPOG00000001123	153.344	154.61	102.102	117.197	144.45	97.3141	96.205	84.2656	90.868	72.7191	90.3494	128.941	30.646	137.384	136.172	63.3333	156.43	111.857	139.561	74.6399	76.1155	84.3458	98.6642
ENSCPOG00000001128	158.789	175.363	176.279	202.259	191.576	243.701	242.803	157.753	156.867	157.109	200.981	173.968	88.3326	154.755	116.066	151.224	145.67	195.749	125.32	157.988	196.537	173.653	194.426
ENSCPOG00000001129	261.321	345.538	263.546	286.376	217.188	217.917	229.976	338.042	315.647	185.838	177.933	220.019	158.638	300.825	360.079	258.503	328.585	113.785	193.676	289.852	315.823	231.207	314.371
ENSCPOG00000001130	455.496	787.577	610.869	988.61	555.263	783.503	738.488	628.072	401.732	828.639	528.268	874.959	630.947	897.736	794.184	601.02	798.701	689.461	754.766	544.871	842.951	450.506	618.102
ENSCPOG00000001132	3470.66	2929.29	2739.31	2787.2	2693.33	2049.42	3391	2562.26	2902.99	2984.18	5273.46	2042.59	2640.96	1996.02	2342.34	3144.69	2187.53	2448.31	2231.07	2249.15	1908.57	2491.67	3105.02
ENSCPOG00000001134	21.7767	35.2801	42.7608	60.4886	69.664	47.4094	66.8854	55.8504	36.3472	61.9459	35.9554	32.747	50.4758	66.3235	74.0264	49.1156	99.3203	28.9284	63.6092	46.028	67.0271	82.3612	54.1686
ENSCPOG00000001136	204.157	216.869	300.198	320.4	194.649	271.149	134.687	318.445	187.475	312.423	145.665	223.089	277.617	277.138	300.675	219.728	400.592	209.249	263.931	262.484	269.245	209.376	298.894
ENSCPOG00000001139	314.855	265.639	385.72	409.243	320.659	352.66	535.999	303.748	380.689	403.995	404.729	503.485	456.084	461.896	588.555	381.292	462.667	345.213	250.639	393.104	494.183	393.944	381.115
ENSCPOG00000001140	2335.55	2854.58	2177.31	2241.86	2505.85	2528.5	2313.5	2153.67	2710.74	2126.81	2191.43	2784.52	2042.47	2351.33	2331.37	2639.32	2342.3	2495.56	2808.3	2397.19	2452.74	2355.73	2372.78
ENSCPOG00000001141	2623.19	1969.46	1994.05	1990.45	1615.59	1652.68	2595.7	1921.45	2419	2312.65	3070.04	1583.11	1961.34	1481.23	2120.26	2411.83	1651.2	2023.06	1711.75	2030.21	1732.48	2120.55	2112.57
ENSCPOG00000001143	227.748	511.562	662.357	583.147	314.512	407.555	263.876	263.575	257.3	433.622	209.279	494.275	313.671	913.528	460.609	138.299	326.929	337.498	526.912	289.852	199.945	462.413	551.359
ENSCPOG00000001145	0	1.03765	0	0	0	0	4.58119	2.9395	0	0	0.921933	10.2334	0	1.57913	0	3.87755	0	1.92856	0	2.488	0	0	0
ENSCPOG00000001146	716.817	1138.3	1174.61	1188.03	1236.54	1413.97	898.829	1396.26	1048.33	1200.31	936.684	873.935	1418.73	1369.11	1201.79	955.169	1480.7	896.781	1149.71	1088.5	1307.6	973.45	1260.39
ENSCPOG00000001148	3132.22	3677.44	2513.29	3187.94	3670.68	4363.33	4663.65	3845.84	2643.78	2621.48	1204.97	3381.13	2853.68	3100.63	2832.19	3846.53	2687.44	3683.55	3617.18	4097.73	2459.55	3997	3119.53
ENSCPOG00000001149	2904.47	2388.67	2633.72	2958.27	2829.59	2689.03	3462.46	2584.8	2533.78	2842.33	4336.77	2469.33	3753.23	2556.61	2622.91	4013.26	2487.15	2202.42	2438.04	3250.57	3134.37	3888.84	2619.44
ENSCPOG00000001151	908.271	1141.42	939.866	1085.01	1112.57	1075.45	1081.16	1231.65	874.246	1388.85	1200.36	1161.49	1070.81	1129.08	1062.87	1026.26	1134.73	991.281	1101.29	984.003	1196.26	1193.74	996.315
ENSCPOG00000001152	0	0	0	0	0	0	2.74871	0	1.91301	1.79553	2.7658	0	1.80271	0	1.82781	0	0.82767	0	4.74696	1.244	2.27211	0	0.967296
ENSCPOG00000001155	639.691	820.782	809.838	750.436	651.563	806.792	820.949	508.533	948.853	892.381	506.141	762.391	740.912	864.575	701.88	677.278	756.49	629.675	826.92	685.443	669.135	824.604	834.776
ENSCPOG00000001156	1571.55	1097.83	1147.56	1126.6	1097.21	1408.14	1246.08	1285.54	1309.46	1149.14	1238.16	1472.59	876.115	1048.54	1056.48	1096.05	1229.92	1485.96	1255.1	954.147	763.428	985.357	1364.85
ENSCPOG00000001163	2448.07	2798.55	3132.89	3655.78	4095.83	4107.15	2815.6	3316.73	2733.69	3280.44	2030.1	2989.19	3051.98	3572.79	3887.76	2037	4086.2	3399.09	3598.19	2015.28	2502.72	2389.47	3029.57
ENSCPOG00000001164	1112.43	1131.04	1131.85	1150.23	984.516	1379.86	966.631	1143.46	1005.29	1313.43	732.015	1398.91	969.856	1275.94	1091.2	798.775	1248.95	1103.14	1208.57	984.003	1111.06	937.727	1066.93
ENSCPOG00000001166	203.249	147.346	152.717	134.209	177.233	148.05	126.441	98.963	99.4766	150.825	161.338	184.202	115.373	165.809	163.589	156.394	192.847	199.606	157.599	170.428	144.279	116.099	151.865
ENSCPOG00000001168	571.639	244.886	133.519	115.306	36.8809	182.984	267.541	49.9714	183.649	140.949	288.565	232.299	81.1217	176.863	138.914	117.619	139.048	352.927	135.763	191.576	52.2584	40.6844	209.903
ENSCPOG00000001169	513.568	538.541	1116.14	853.456	1304.15	1153.63	750.399	931.82	1334.32	1023.45	493.234	1343.65	773.361	1021.7	934.926	594.557	1099.97	934.388	1086.1	692.907	900.89	1031	886.043
ENSCPOG00000001170	2.72209	0	3.49068	0	0	0.831744	0	4.89916	14.3476	0	0	0	0	4.7374	0	0	0	0	5.69635	3.732	6.81632	0	0
ENSCPOG00000001173	2321.94	1841.83	2050.77	2088.75	1885.03	2134.26	2452.77	2102.72	2081.36	2326.11	3370.59	2025.2	2503.96	1916.28	1953.02	3121.42	1951.64	2012.45	2023.15	2650.96	2205.08	2524.42	2014.88
ENSCPOG00000001176	4518.67	4287.57	4676.64	5293.69	5643.81	4868.2	5021.9	4697.31	4214.36	5419.82	5822.01	4754.45	5489.24	5366.68	4812.63	4769.38	4812.07	4781.87	5096.33	5371.59	4579.43	5515.22	4741.68
ENSCPOG00000001177	1243.09	845.686	993.971	1098.25	1023.45	878.322	1199.36	1039.6	993.809	1215.58	1488.92	774.671	1278.12	1004.33	1132.33	1274.42	1006.45	1137.85	940.847	1227.83	1273.52	1182.83	999.217
ENSCPOG00000001178	1821.99	2495.55	2180.8	2449.79	2160.61	2303.1	2491.25	2546.58	2529	2406.91	3263.64	1905.47	2561.64	2472.92	2317.67	2299.38	2314.99	2461.81	2211.13	2481.78	2437.97	2050.1	2139.66
ENSCPOG00000001179	768.537	432.701	788.894	755.162	1011.15	799.306	886.002	689.802	504.078	811.582	496.922	663.127	769.755	868.523	688.171	725.101	820.221	607.497	772.804	812.331	568.026	860.327	594.887
ENSCPOG00000001180	365.667	597.687	582.071	563.3	429.253	524.831	335.343	736.834	546.165	562.9	401.963	650.846	553.431	588.227	536.463	464.013	589.301	525.533	513.621	579.703	716.849	451.498	437.218
ENSCPOG00000001181	0	10.3765	0	0	0	9.98093	0	0	0	0	0	0	0	0	2.74172	0	5.79369	2.89284	0	0	0	0	0
ENSCPOG00000001182	0	0	0	0	0	0	0	0	0	8.97767	18.4387	5.11672	0	0	0	0	0	6.74997	0	4.97599	0	0	0
ENSCPOG00000001183	1481.72	1046.99	1142.33	1205.99	1290.83	1056.32	1272.65	1121.91	1159.28	1191.34	1490.77	1362.07	1184.38	1074.6	1268.5	1327.41	1205.09	1110.85	1255.1	1292.51	1228.07	1527.15	1199.45
ENSCPOG00000001184	1367.4	1090.57	1187.7	1386.51	925.097	1008.07	1157.21	925.941	1301.8	1097.97	1902.87	979.34	1166.35	1005.91	1023.57	1417.89	1096.66	1042.39	1026.29	1348.49	1201.94	1310.83	1200.41
ENSCPOG00000001185	977.23	1108.21	900.595	993.335	847.237	831.744	1054.59	856.373	1158.33	885.198	869.383	807.418	785.98	987.747	908.423	1118.03	888.917	818.674	775.653	1199.21	1075.84	1152.06	945.048
ENSCPOG00000001186	217.767	529.202	387.465	527.385	463.061	338.52	243.719	645.709	591.12	358.209	303.316	468.691	434.452	392.414	400.291	253.333	318.653	401.141	356.022	733.959	497.591	587.444	511.7
ENSCPOG00000001187	5437.83	3929.58	4421.82	3923.25	4442.1	3401	4978.84	4265.21	4585.49	4798.57	8052.16	3312.56	3890.24	3385.66	3827.44	5077	3353.72	3860.02	3758.64	3970.84	3324.09	4484.22	4259
ENSCPOG00000001190	1311.14	1610.43	1385.8	1296.72	1383.04	1560.35	1214.93	1610.84	1708.32	1264.95	996.61	1414.26	1557.54	1642.3	1417.47	1666.05	1640.44	1479.21	1822.83	1737.87	1691.58	1675.01	1509.95
ENSCPOG00000001194	589.786	1013.79	1005.32	958.366	1064.42	936.544	960.217	887.728	972.766	1116.82	840.803	918.962	1094.24	1060.39	934.012	962.924	890.572	1010.57	911.416	911.851	884.985	961.542	1041.78
ENSCPOG00000001195	1357.42	1692.41	1569.93	1665.33	1658.62	1570.33	1728.94	1582.43	1813.53	1631.24	1840.18	1603.58	1508.86	1563.34	1447.63	1950.41	1522.91	1497.53	1519.98	1736.62	1768.83	1863.55	1770.15
ENSCPOG00000001197	1655.03	1107.17	1343.04	1114.31	1251.9	935.712	1441.24	1181.68	1226.24	1345.75	2608.15	1213.69	1323.19	937.215	1220.06	1695.78	1133.08	1132.07	994.013	1357.2	1287.15	1191.76	1338.74
ENSCPOG00000001199	690.503	674.473	643.158	908.273	695.615	557.269	778.802	657.467	861.811	674.223	833.427	872.912	594.893	680.606	662.582	567.414	708.485	938.245	981.67	650.611	649.822	604.313	809.627
ENSCPOG00000001200	850.199	719.092	1450.38	1140.78	1114.62	1132.84	831.944	1325.71	1048.33	1219.17	1078.66	831.978	989.685	955.375	1242.91	803.945	1449.25	798.425	1372.82	1133.28	1248.52	950.627	1007.92
ENSCPOG00000001201	885.586	1196.41	1141.45	1261.75	1330.79	1081.27	1213.1	1287.5	924.941	1278.42	1457.58	910.776	1350.23	1273.57	1128.67	1350.68	1182.74	983.566	1083.26	1079.79	1317.82	1066.73	1075.63
ENSCPOG00000001202	6.35154	11.4142	24.4348	31.1894	15.3671	5.82221	9.16238	14.6975	18.1736	9.87544	14.7509	32.747	41.4622	9.47479	13.7086	31.0204	23.1747	27.9641	15.1903	21.148	24.9932	20.8384	13.5421
ENSCPOG00000001208	1083.39	899.644	1233.96	1094.46	1016.27	1008.07	1268.99	1171.88	1133.46	958.815	1277.8	886.215	1115.87	1099.87	1100.34	1167.14	966.718	1109.89	1242.75	1253.95	1104.24	986.35	892.814
ENSCPOG00000001209	1596.96	733.619	300.198	195.643	1170.97	312.736	36.6495	134.237	48.7818	971.384	808.535	775.694	663.396	2529.77	300.675	146.054	868.225	896.781	889.58	1494.04	314.687	341.352	1215.89
ENSCPOG00000001210	3640.34	3629.7	3701.87	3781.48	4320.19	4581.25	4067.18	3651.83	4305.23	3655.71	3498.74	4520.11	3785.68	4109.69	4098.87	4132.17	4299.74	4140.62	4896.01	3452.1	3771.7	4211.34	3784.06
ENSCPOG00000001212	55.3492	12.4518	0	2.8354	0	0	0	11.758	11.4781	0.897767	26.7361	0	0	0	7.31125	12.9252	0	40.4998	0	2.488	15.9047	0	0
ENSCPOG00000001214	1654.12	1355.17	1998.41	1542.46	1615.59	1819.02	1766.51	1601.05	1283.63	1396.93	752.297	1964.82	1252.88	1834.95	1251.14	1282.18	1320.13	1625.78	1842.77	1414.43	1040.62	1589.67	2128.05
ENSCPOG00000001215	29.943	3.11295	1.74534	2.8354	24.5873	2.49523	0.916238	0.979832	18.1736	1.79553	70.0669	1.02334	0	0.789566	3.65562	2.58503	0	18.3213	2.84817	2.488	1.13605	0.992303	0.967296
ENSCPOG00000001216	2547.88	2283.87	2623.25	2496.1	2496.63	2322.23	2934.71	2547.56	3039.77	2651.11	2775.94	2303.55	2293.04	2499.77	2439.22	2530.75	2323.27	3150.31	2520.63	2450.68	2148.28	2294.21	2410.5
ENSCPOG00000001218	594.323	612.214	698.136	794.857	769.377	828.417	678.016	699.6	601.642	869.039	723.717	783.881	722.885	973.535	788.701	493.741	862.432	769.496	824.072	544.871	656.639	685.682	671.303
ENSCPOG00000001219	120.679	84.0497	156.208	120.032	119.863	100.641	135.603	117.58	106.172	98.7544	92.1933	145.315	84.7272	106.591	127.947	107.279	124.978	187.07	91.1416	118.18	111.333	99.2303	131.552
ENSCPOG00000001220	7.25891	8.30121	53.2329	58.5983	28.6852	101.473	12.8273	33.3143	35.3907	35.0129	0	0	34.2514	61.5861	17.3642	24.5578	41.3835	67.4997	38.925	18.66	45.4421	63.5074	30.9535
ENSCPOG00000001225	162.418	132.819	106.466	210.765	123.961	192.133	221.73	206.745	308.951	166.087	166.87	292.676	167.652	161.071	234.874	228.775	163.051	220.82	159.498	185.356	171.544	196.476	144.127
ENSCPOG00000001226	192.361	458.642	479.969	609.611	493.795	366.799	401.312	554.585	323.299	508.136	315.301	475.855	432.649	561.381	465.178	426.53	429.561	363.534	483.24	655.587	531.673	450.506	489.452
ENSCPOG00000001227	548.955	790.69	685.046	761.778	846.213	712.805	775.137	681.963	711.64	804.399	773.502	660.057	858.088	730.349	635.165	904.761	663.791	620.997	774.703	935.487	798.645	809.72	695.486
ENSCPOG00000001228	68.9596	43.5813	29.6708	54.8178	0	79.8474	63.2204	51.9311	38.2602	20.6486	64.5353	5.11672	25.2379	24.4765	24.6755	34.8979	16.5534	43.3926	32.2793	43.54	37.4897	49.6152	39.6591
ENSCPOG00000001229	383.815	388.082	510.512	499.976	396.47	455.796	373.825	460.521	459.123	316.912	431.465	304.956	402.003	346.619	532.807	542.856	509.844	366.427	334.186	381.908	563.482	351.275	351.128
ENSCPOG00000001231	0	0	0	14.177	0	0	0.916238	0	0	10.7732	43.3309	31.7236	12.6189	0	5.48344	2.58503	0	17.3571	0	0	3.40816	9.92303	0
ENSCPOG00000001232	1218.59	1140.38	1178.1	1178.58	1268.29	1112.04	1104.07	1136.61	1144.94	1280.22	1420.7	1098.05	1245.67	1096.71	1198.13	1183.94	1025.48	1054.92	1110.79	1107.16	1004.27	1058.79	982.773
ENSCPOG00000001236	8012.02	7462.79	6305.04	6445.81	6901.86	7012.44	8357	6331.67	8150.38	6609.36	9879.43	7900.21	8335.71	6344.16	6589.26	8923.53	6608.94	7878.17	6726.44	8425.6	8412.47	8641.97	6783.65
ENSCPOG00000001238	1537.98	2616.96	1734	2327.86	1679.11	2570.92	1440.33	2670.04	2144.48	2207.61	1629.98	2330.15	2776.17	2365.54	2445.61	2211.49	2593.09	2283.42	2251.01	2334.99	3088.93	2192	2039.06
ENSCPOG00000001241	67.1449	176.401	104.72	224.942	134.206	204.609	120.943	170.491	192.258	157.109	157.651	268.116	122.584	106.591	224.821	139.592	142.359	152.356	82.597	175.404	152.231	162.738	116.076
ENSCPOG00000001244	295.8	1003.41	762.714	605.831	634.147	888.303	491.103	810.321	869.463	563.798	602.944	960.92	753.531	750.088	796.012	754.829	737.454	704.889	612.357	621.999	854.312	698.582	603.593
ENSCPOG00000001245	39.0166	99.6145	39.2702	18.9027	62.4927	30.7745	54.058	83.2857	23.9126	46.6839	61.7695	13.3035	14.4216	23.687	41.1258	33.6054	19.0364	39.5355	18.9878	58.4679	10.2245	24.8076	23.2151
ENSCPOG00000001247	6043.95	4373.7	5857.36	6585.69	6220.58	5878.77	7325.32	6273.86	5244.52	5893.84	4647.46	6151.32	6415.83	6754.74	6186.23	8164.82	6788.55	6540.72	8547.37	8100.92	6192.62	8081.32	6020.45
ENSCPOG00000001249	0	0	0.87267	0	0	0	8.24614	0	0	0	0	8.18675	0	5.52696	0	0	0	0	0	0	2.27211	0	0
ENSCPOG00000001250	21.7767	0	0	6.61594	0	0	8.24614	8.81849	11.4781	13.4665	21.2045	0	0	0	0	0	0	4.8214	0	3.732	0	0	0
ENSCPOG00000001252	744.038	380.818	461.642	375.218	440.522	257.841	583.643	324.324	590.164	465.941	893.353	371.474	293.841	251.872	467.92	374.829	390.66	665.354	349.376	248.8	277.197	248.076	370.474
ENSCPOG00000001253	0	81.9744	3.49068	13.2319	8.19576	21.6253	27.4871	41.1529	32.5212	43.0928	607.554	36.8404	1.80271	2.3687	86.8211	10.3401	38.9005	34.7141	27.5323	4.97599	14.7687	1.98461	5.80378
ENSCPOG00000001254	0	24.9036	25.3074	8.5062	9.22023	28.2793	8.24614	14.6975	0	10.7732	3.68773	4.09337	1.80271	11.0539	10.9669	5.17006	17.3811	4.8214	5.69635	3.732	17.0408	3.96921	6.77107
ENSCPOG00000001255	0	0	12.2174	0	0	0	0	0	4.78253	0	24.8922	0	5.40812	1.57913	1.82781	6.46258	0	2.89284	0	0	0	0	5.80378
ENSCPOG00000001256	1253.07	927.66	1243.55	1332.64	1291.86	1320.81	1225.01	1233.61	922.071	1228.15	808.535	1264.85	1460.19	1321.73	1282.21	1381.7	1316.82	1045.28	1358.58	1349.74	1372.35	1655.16	1092.08
ENSCPOG00000001258	557.121	389.119	496.549	550.068	540.92	530.653	492.936	439.945	447.644	589.833	683.152	648.8	587.682	529.799	530.979	526.054	532.192	531.319	463.303	455.304	476.006	523.936	476.877
ENSCPOG00000001259	22.6841	28.0166	40.1428	51.9824	38.9299	53.2316	33.9008	33.3143	39.2167	23.3419	25.8141	39.9104	55.8839	19.7391	37.4701	46.5306	29.7961	53.0354	25.6336	47.272	62.4829	33.7383	14.5094
ENSCPOG00000001260	298.522	399.496	365.649	421.53	461.012	386.761	349.087	400.751	344.342	424.644	260.907	407.291	237.957	505.322	428.622	214.558	441.148	404.034	511.722	235.116	269.245	243.114	444.956
ENSCPOG00000001261	34.4798	58.1085	42.7608	46.3115	13.3181	18.2984	38.482	36.2538	14.3476	27.8308	17.5167	3.07003	9.01353	12.6331	42.9536	25.8503	12.415	20.2499	13.2915	33.588	14.7687	6.94612	18.3786
ENSCPOG00000001262	145.178	144.234	202.459	213.6	261.24	212.927	205.237	191.067	176.953	281.899	109.71	156.572	279.419	279.506	344.543	219.728	283.063	200.57	146.206	238.848	279.469	240.137	232.151
ENSCPOG00000001263	63.5154	58.1085	17.4534	21.7381	17.416	19.1301	50.3931	24.4958	7.65204	45.7861	237.859	54.2372	14.4216	25.2661	19.192	32.3129	14.0704	156.214	4.74696	9.95199	9.08842	14.8846	29.9862
ENSCPOG00000001264	78.0332	78.8615	44.5062	28.354	55.3214	34.9333	26.5709	67.6084	128.172	34.1152	109.71	45.0271	108.162	26.0557	84.9933	89.1836	68.6966	134.999	87.344	133.108	124.966	61.5228	42.561
ENSCPOG00000001265	0	0	5.23602	0	0	0	0	0	0	0	0	0	0	0	0	0	0	6.74997	0	0	2.27211	0	0
ENSCPOG00000001268	0	4.1506	1.74534	0	2.04894	0.831744	2.74871	1.95966	2.86952	0.897767	3.68773	0	0	4.7374	6.39734	0	2.48301	1.92856	0.949391	0	2.27211	0.992303	0
ENSCPOG00000001271	526.271	517.788	281	327.961	465.11	347.669	347.254	490.896	321.386	455.168	628.758	456.411	632.75	437.42	408.516	324.421	455.218	654.747	412.036	467.744	571.435	441.575	407.232
ENSCPOG00000001272	623.359	726.356	556.763	620.953	648.49	538.97	612.963	483.057	709.727	656.268	623.227	574.096	517.376	605.597	532.807	809.115	498.257	529.39	682.612	609.559	624.829	685.682	567.803
ENSCPOG00000001273	57.1639	56.0332	41.0155	29.2991	45.0767	29.9428	62.3042	33.3143	50.6948	28.7285	69.145	60.3773	25.2379	41.847	28.3311	25.8503	39.7281	35.6784	43.672	24.88	43.17	33.7383	18.3786
ENSCPOG00000001277	15.4252	33.2048	70.6863	47.2567	28.6852	28.2793	50.3931	62.7092	60.2598	34.1152	33.1896	24.5602	12.6189	37.1096	34.7284	16.8027	52.9709	25.0713	42.7226	38.564	47.7142	34.7306	59.9724
ENSCPOG00000001279	1369.21	1611.47	1249.66	1008.46	1148.43	1624.4	1095.82	1109.17	1479.71	1092.58	529.19	1506.36	598.498	1054.07	1301.4	1054.69	1224.12	1318.17	1838.97	847.163	775.924	1012.15	1125.93
ENSCPOG00000001282	981.767	844.648	780.167	799.583	763.231	747.738	832.86	868.131	734.596	975.873	1204.04	874.959	820.231	895.368	833.482	871.155	832.636	971.995	739.576	818.551	828.183	848.419	764.164
ENSCPOG00000001284	400.147	527.127	546.291	603.94	595.217	551.446	440.71	496.775	555.73	557.513	440.684	463.575	648.974	510.06	571.191	557.074	452.735	350.034	489.886	534.919	596.428	647.974	479.779
ENSCPOG00000001285	3472.48	2649.12	2871.08	2709.7	2991.45	2270.66	3533.93	2991.43	3220.55	3278.65	4211.39	2530.73	2675.21	2686.89	2788.33	3527.27	2535.15	3210.09	2551.01	3086.36	2774.24	3190.26	2811.93
ENSCPOG00000001286	383.815	451.378	643.158	607.721	632.098	562.259	595.555	711.358	656.163	679.61	673.933	610.936	796.796	597.701	705.535	651.428	718.417	710.675	528.811	630.707	719.121	644.997	641.317
ENSCPOG00000001288	1967.16	1268.01	1509.72	1767.4	2025.38	1537.89	1382.6	1924.39	1360.15	1685.11	1244.61	1555.48	1968.55	1876.01	1773.89	1551.02	1913.57	1916.03	1678.52	1637.1	1705.22	1533.11	1645.37
ENSCPOG00000001289	1321.12	2138.6	1664.18	2105.76	1402.5	2432.85	1340.46	1955.74	1193.72	1869.15	1045.47	1727.4	2808.62	2541.61	1994.14	1328.71	2383.69	1943.99	2055.43	1913.27	2457.28	2187.04	1804.01
ENSCPOG00000001290	548.047	488.734	447.68	358.206	451.791	420.863	541.496	500.694	470.601	407.586	763.361	410.361	405.609	395.573	390.238	607.482	354.243	435.855	377.858	487.647	391.938	496.152	439.152
ENSCPOG00000001291	205.971	25.9413	25.3074	33.0797	3.07341	29.9428	43.9794	59.7698	47.8253	56.5593	303.316	64.4706	27.0406	11.0539	44.7814	29.7279	25.6578	67.4997	9.49391	22.392	36.3537	22.823	30.9535
ENSCPOG00000001295	1344.71	1069.82	1314.24	1115.26	1319.52	1225.99	1235.09	1173.84	1143.98	1446.3	1795.93	1058.14	1056.39	1143.29	1173.46	1435.98	948.509	1167.74	1182.94	1237.78	1029.26	1243.36	1145.28
ENSCPOG00000001296	3310.97	3514.52	4681	3859.93	5070.1	5539.42	4077.26	4073.16	3106.73	2783.98	3489.52	5010.29	4495.95	4647.39	4532.97	3103.33	5078.58	3641.12	3795.67	4513.23	4561.25	3179.34	5205.02
ENSCPOG00000001298	761.278	644.381	747.878	637.02	763.231	607.173	819.117	762.309	772.856	654.472	941.294	850.398	493.941	696.397	917.562	529.931	689.449	719.354	688.309	649.367	524.856	563.628	787.379
ENSCPOG00000001299	754.019	922.472	845.617	792.967	792.94	886.639	747.65	785.825	852.246	736.169	567.911	1390.72	791.388	795.882	709.191	921.563	808.633	714.532	1026.29	837.211	739.57	758.12	885.076
ENSCPOG00000001300	364.76	226.208	138.755	119.087	165.964	29.9428	151.179	188.128	67.9119	119.403	180.699	243.556	12.6189	204.498	178.212	1.29252	134.082	161.999	351.275	7.46399	6.81632	1.98461	145.094
ENSCPOG00000001303	237.729	71.5979	188.497	207.929	128.059	289.447	299.61	240.059	257.3	166.985	174.245	195.459	182.073	195.023	242.185	231.36	276.442	173.571	187.979	150.524	204.49	157.776	250.53
ENSCPOG00000001304	610.655	562.407	427.608	488.634	559.361	458.291	494.768	416.429	405.558	473.123	395.509	632.426	403.806	394.783	464.264	476.938	373.279	550.604	458.556	513.771	411.251	527.905	497.19
ENSCPOG00000001305	0	30.0919	0	0	0	0	0	0	0	2.6933	26.7361	0	0	6.31653	11.8808	0	0	8.67853	9.49391	2.488	10.2245	0	0
ENSCPOG00000001306	225.026	355.914	308.925	308.114	214.114	230.393	297.777	324.324	320.429	390.529	333.74	388.871	351.528	390.046	360.993	289.523	312.031	245.892	334.186	344.588	412.387	358.222	362.736
ENSCPOG00000001307	1412.76	1973.61	1450.38	1156.84	1322.59	1242.63	1266.24	1705.89	1849.88	1256.87	1108.16	1957.66	879.72	1719.67	1523.48	1203.33	1404.56	1378.92	1694.66	1175.58	1117.88	1056.8	1557.35
ENSCPOG00000001313	746.76	1461.01	1137.09	1115.26	1274.44	1368.22	875.923	1074.88	757.552	1269.44	863.851	1092.93	1544.92	1407.8	1465.91	1049.52	1258.89	1018.28	1211.42	1161.89	1454.15	943.681	1002.12
ENSCPOG00000001316	592.508	344.5	459.024	457.445	419.008	329.371	508.512	457.582	411.297	472.226	689.606	316.213	499.349	330.828	335.404	589.387	361.692	524.569	338.933	446.596	416.931	480.275	452.695
ENSCPOG00000001318	0	7.26356	0	0	3.07341	0	0	0.979832	0	0.897767	0	10.2334	0	0	0	0	0	0	0	0	0	0	0
ENSCPOG00000001319	0	14.5271	0	0	5.12235	4.15872	0	0	0	0	121.695	0	0	0.789566	8.22515	0	0.82767	8.67853	9.49391	0	3.40816	0	6.77107
ENSCPOG00000001320	55.3492	31.1295	55.8509	42.531	24.5873	17.4666	31.1521	5.87899	60.2598	9.87544	164.104	0	10.8162	26.0557	37.4701	10.3401	30.6238	187.07	0	18.66	13.6326	18.8538	29.0189
ENSCPOG00000001323	5687.35	8722.5	12528.9	9568.53	8149.66	10026.7	7097.18	15063	8769.24	11335.2	6507.93	11793	10277.2	9987.22	9964.32	8327.68	11397.8	10385.3	12776	8712.97	12394.3	6529.36	9206.72
ENSCPOG00000001326	371.112	374.592	385.72	443.268	446.669	395.91	340.84	350.78	423.732	418.36	322.677	431.851	398.398	460.317	405.774	611.36	412.179	440.676	394.947	427.936	426.02	441.575	522.34
ENSCPOG00000001327	3018.8	2379.33	2406.82	2126.55	2276.37	1894.71	2608.53	2421.16	2636.13	2340.48	4087.85	2090.69	2765.35	1850.74	2138.54	3202.85	2286.02	2696.13	2404.81	2956.98	2748.11	2878.67	2416.31
ENSCPOG00000001331	3458.87	4091.46	3406.9	3499.83	3590.77	4369.15	3183.01	3422.55	3760.98	3456.4	2515.03	4773.9	4209.32	3933.62	3609.93	3921.49	3270.12	4077.94	3642.81	3596.4	3597.88	3862.04	3269.46
ENSCPOG00000001335	1258.51	1536.76	1247.92	1177.64	1265.22	1559.52	1259.83	1307.1	1503.63	1315.23	1122.91	1321.14	1487.23	1317	1515.26	1551.02	1324.27	1450.28	1292.12	1617.2	1478	1387.24	1345.51
ENSCPOG00000001337	0	1.03765	3.49068	0	1.02447	4.99046	1.83248	0	0.956505	0	0.921933	7.1634	1.80271	2.3687	0.913906	3.87755	2.48301	3.85712	0	2.488	3.40816	1.98461	1.93459
ENSCPOG00000001338	11633.3	10970	19326.2	16172.2	16436.6	16634.9	14758.8	15972.2	14038.6	16987.6	12843.4	15049.3	20116.4	16821.7	18019.5	15228.4	22732.8	16026.3	23053.1	17984.5	19036.8	18621.6	14814.1
ENSCPOG00000001340	46.2755	374.592	260.056	257.076	296.072	212.927	155.76	368.417	219.04	152.62	223.108	346.913	308.263	277.927	336.317	250.748	377.417	294.106	187.03	283.632	431.7	240.137	204.099
ENSCPOG00000001344	47.1829	111.029	53.2329	45.3664	72.7374	43.2507	43.9794	46.0521	60.2598	21.5464	16.5948	74.7041	95.5434	43.4261	51.1787	93.0611	29.7961	52.0712	34.1781	67.1759	102.245	67.4766	65.7761
ENSCPOG00000001346	684.152	400.533	482.587	602.995	625.951	548.951	526.837	798.563	486.861	553.025	367.851	404.221	576.866	447.684	541.946	272.721	700.208	498.533	605.712	345.832	428.292	443.56	430.447
ENSCPOG00000001347	7873.19	5973.76	6613.09	4922.26	5624.34	5818.88	7747.71	6716.75	4935.57	5009.54	7472.27	6670.15	9172.17	7889.34	3705.89	7649.11	6359.81	8698.78	5715.33	9944.53	8823.72	8668.76	7362.09
ENSCPOG00000001349	0	17.6401	39.2702	1.89027	0	4.99046	0.916238	9.79832	11.4781	37.7062	41.487	4.09337	18.0271	11.0539	3.65562	10.3401	19.0364	57.8569	24.6842	22.392	1.13605	18.8538	7.73837
ENSCPOG00000001350	202.342	198.191	249.584	207.929	183.38	186.311	241.887	213.603	207.562	242.397	338.349	178.062	169.454	208.445	199.232	183.537	147.325	190.928	196.524	123.156	97.7005	145.869	283.418
ENSCPOG00000001351	3183.03	2043.14	3462.75	2632.2	3227.08	2845.4	2812.85	2460.36	2516.57	3372.01	1515.66	3086.4	2646.37	2499.77	2370.67	2657.41	3127.76	2556.31	3624.78	2797.75	2417.52	3278.57	2560.43
ENSCPOG00000001353	123.401	90.2756	269.655	259.912	366.76	238.711	220.813	231.24	199.91	297.161	60.8476	266.069	245.168	205.287	251.324	170.612	355.898	345.213	331.338	406.788	390.802	240.137	136.389
ENSCPOG00000001354	332.095	412.985	379.611	381.834	453.84	401.732	329.846	358.619	371.124	451.577	392.743	358.17	589.485	454.79	417.655	372.244	412.179	482.14	351.275	430.424	445.333	484.244	446.891
ENSCPOG00000001359	3945.22	3735.54	4029.12	5029.06	3872.5	4340.87	4256.84	4304.4	3473.07	3636.85	3013.8	4215.15	3221.43	4425.52	4697.48	3653.94	4519.9	4231.26	5518.81	3811.61	3452.46	3023.55	4073.28
ENSCPOG00000001360	841.126	618.44	672.829	572.751	742.741	664.564	721.079	602.597	900.071	768.489	939.45	757.274	650.777	713.768	784.131	763.877	702.691	721.282	787.045	821.039	681.632	753.158	754.491
ENSCPOG00000001361	2510.67	2357.54	2344.86	2735.22	2835.73	2811.3	2542.56	2596.55	2343.44	2450.9	1643.81	3162.13	1842.36	3027.99	2799.29	2130.07	2760.28	2743.38	2919.38	2382.26	1898.34	2258.48	3243.34
ENSCPOG00000001363	0	0	0	0	0	2.49523	0	0	0	3.59107	0	0	9.01353	12.6331	0	0	2.48301	0.964281	2.84817	0	0	2.97691	0.967296
ENSCPOG00000001367	5.44418	0	3.49068	0	0	0.831744	0	0	2.86952	0	7.37546	7.1634	0	1.57913	6.39734	1.29252	0.82767	4.8214	0	0	0	0.992303	0.967296
ENSCPOG00000001369	1692.23	1891.64	1692.98	1941.3	1979.28	1931.31	2120.17	1964.56	2095.7	2095.39	2074.35	1796.99	2073.11	2186.31	1889.04	2117.14	1666.1	1796.46	2040.24	2081.21	1752.93	2056.05	2001.34
ENSCPOG00000001371	1.81473	0	0	0	0	0	9.16238	0	0	0	5.5316	0	0	0	0	0	0	0	0	0	0	0	0
ENSCPOG00000001372	226.841	484.583	499.167	502.811	479.452	563.923	437.962	501.674	519.382	470.43	472.03	539.302	439.86	551.117	568.45	342.517	448.597	383.784	393.048	398.08	405.571	424.706	382.082
ENSCPOG00000001373	0	0	1.74534	0	0	0	0	0	0	1.79553	20.2825	0	0	0	0	0	0	8.67853	0	0	0	0	1.93459
ENSCPOG00000001374	293.986	305.069	233.876	211.71	273.534	207.104	289.531	280.232	390.254	276.512	452.669	315.19	259.59	251.872	240.357	456.258	281.408	255.534	265.83	439.132	291.966	362.191	257.301
ENSCPOG00000001375	54.4418	49.8073	31.4161	38.7505	39.9543	56.5586	74.2153	34.2941	40.1732	67.3325	49.7844	54.2372	77.5163	37.8992	38.3841	64.6258	39.7281	43.3926	50.3177	46.028	51.1224	41.6767	53.2013
ENSCPOG00000001377	56.2565	127.631	59.3416	74.6656	38.9299	64.876	73.299	48.9916	80.3464	62.8437	45.1747	86.9842	77.5163	57.6383	53.9205	40.068	62.9029	72.3211	21.836	57.2239	52.2584	62.5151	53.2013
ENSCPOG00000001382	523.549	306.107	164.062	116.251	82.9821	67.3713	72.3828	128.358	158.78	150.825	451.747	142.245	127.992	75.7983	138.914	254.626	169.672	485.033	79.7489	135.596	103.381	59.5382	100.599
ENSCPOG00000001384	412.85	469.018	359.54	318.51	312.463	341.015	393.982	398.792	306.082	314.219	392.743	314.166	470.506	231.343	296.106	528.639	386.522	443.569	336.084	480.183	403.299	366.16	343.39
ENSCPOG00000001386	788.499	978.505	810.71	754.217	782.695	865.014	859.431	890.667	933.549	810.684	790.097	790.021	623.736	836.94	727.469	785.849	854.155	760.818	1028.19	802.379	704.353	741.251	865.73
ENSCPOG00000001388	550.769	389.119	548.909	607.721	657.71	699.497	447.124	413.489	403.645	557.513	424.089	356.124	218.127	564.54	507.218	258.503	674.551	497.569	388.301	184.112	304.462	291.737	471.073
ENSCPOG00000001390	1203.16	2140.67	1761.05	2016.92	1834.83	2320.57	1505.38	1947.91	1849.88	1646.51	1062.99	2108.09	1763.05	2387.65	2246.38	1414.01	2152.77	1854.31	1977.58	2046.38	1968.78	1606.54	1966.51
ENSCPOG00000001391	193.268	234.509	179.77	270.308	196.698	219.58	148.431	259.655	262.082	237.011	363.242	291.653	297.446	250.292	230.304	262.381	240.852	249.749	202.22	329.66	273.789	264.945	232.151
ENSCPOG00000001395	131.568	159.798	24.4348	172.014	130.108	210.431	205.237	246.918	92.781	96.9589	76.5204	314.166	264.998	401.1	171.814	59.4557	168.017	317.248	167.093	207.748	172.68	263.953	249.562
ENSCPOG00000001399	240.451	366.291	423.245	588.818	551.165	589.707	492.936	1223.81	461.992	605.993	448.059	486.088	488.533	613.493	622.37	551.904	551.228	531.319	842.11	827.259	586.203	498.136	580.378
ENSCPOG00000001400	768.537	1029.35	666.72	642.691	706.885	595.529	666.105	709.398	881.898	685.894	797.472	608.889	557.036	620.599	652.529	654.013	691.104	670.175	593.369	714.055	655.503	705.528	716.766
ENSCPOG00000001401	2168.6	1573.08	1388.42	1451.73	1609.44	1159.45	1826.98	1368.83	1517.02	1472.34	2328.8	1150.24	1222.23	1256.99	1271.24	1700.95	1316.82	1666.28	1468.71	1479.11	1170.13	1524.18	1633.76
ENSCPOG00000001402	1832.87	1192.26	1958.27	1760.78	1953.67	2346.35	1565.85	1565.77	1232.94	1990.35	1224.33	1632.23	2165.05	1889.43	1881.73	1492.86	1990.55	1475.35	1886.44	1875.95	1743.84	1694.85	1352.28
ENSCPOG00000001403	2773.81	2933.44	3342.33	3058.45	3018.09	2644.11	3480.79	2985.55	3928.37	2746.27	3894.25	3094.59	2664.4	2824.28	3011.32	3604.83	3525.87	3462.73	3770.98	3442.14	3192.31	3028.51	3181.44
ENSCPOG00000001406	95.2731	38.3931	42.7608	71.8302	75.8108	100.641	59.5555	93.084	53.5643	48.4794	20.2825	79.8208	97.3461	96.327	97.7879	76.2584	67.0412	38.5712	73.1031	68.4199	84.0679	98.238	49.3321
ENSCPOG00000001408	2389.09	3306.99	3045.62	3072.63	3344.9	3268.75	3183.01	3321.63	3125.86	2817.19	1819.9	3683.01	2884.33	3609.11	3128.3	2753.06	3000.3	3380.77	3951.37	3537.93	3090.06	2786.39	3404.88
ENSCPOG00000001409	2025.23	1313.67	1699.96	1425.26	1609.44	1102.89	1803.16	1326.69	1641.36	1852.09	3345.7	1362.07	2547.22	1259.36	1432.09	3367	1139.7	1438.71	1435.48	2624.84	2024.45	2701.05	1846.57
ENSCPOG00000001410	3561.4	3051.73	3243.71	3089.64	3150.25	3487.5	3060.23	2720.99	2850.39	2922.23	1759.05	3763.86	2765.35	3144.84	3152.06	2725.91	3256.05	2915.02	3534.58	3019.18	2760.61	3375.82	3050.85
ENSCPOG00000001411	2414.49	2827.6	2786.44	3078.3	3024.24	3690.45	2727.64	2990.45	2018.23	2836.94	1462.19	3623.66	1732.4	3937.57	3823.78	1377.82	3393.45	3101.13	3439.64	1836.14	1757.47	1585.7	3247.21
ENSCPOG00000001412	1.81473	10.3765	6.98136	0	9.22023	0	6.41366	0.979832	8.60855	5.3866	6.45353	0	1.80271	4.7374	0	0	0	11.5714	15.1903	4.97599	2.27211	7.93843	6.77107
ENSCPOG00000001413	3747.41	4777.35	3863.31	3626.48	3547.74	3915.02	3492.7	4033.97	4472.62	3986.98	4583.85	4332.84	3917.28	3511.99	3568.8	3615.17	3628.5	3947.77	3592.5	3628.74	4034.12	3916.62	3965.91
ENSCPOG00000001414	14.5178	0	13.9627	29.2991	15.3671	24.9523	34.817	8.81849	12.4346	17.0576	30.4238	4.09337	9.01353	39.4783	50.2648	20.6802	19.0364	10.6071	11.3927	18.66	21.585	1.98461	1.93459
ENSCPOG00000001416	1716.73	1107.17	1334.31	1124.71	1305.18	1013.9	1273.57	1308.08	1100.94	1451.69	1671.46	1174.8	744.517	868.523	978.793	987.482	936.922	1156.17	1083.26	857.115	689.584	917.881	1273.93
ENSCPOG00000001417	2735.7	3596.5	3251.57	2370.4	2751.73	3157.3	2265.86	2812.12	3565.85	2081.02	2130.59	2930.86	1883.83	2174.46	2312.18	2689.72	2114.7	2784.84	2921.28	2521.59	2395.94	2626.63	2840.95
ENSCPOG00000001419	160.603	291.58	150.972	156.892	114.741	182.984	213.483	256.716	286.952	215.464	134.602	159.642	127.992	171.336	188.265	286.938	180.432	220.82	191.777	271.192	167	148.846	266.006
ENSCPOG00000001421	2977.06	2925.14	2406.82	2634.09	2693.33	2822.11	2784.45	2670.04	3091.43	2531.7	3882.26	2778.38	3499.05	2396.33	2481.25	3628.09	2605.5	2613.2	2698.17	3301.57	3193.44	3763.81	2780.98
ENSCPOG00000001424	89.829	119.33	80.2856	108.69	76.8353	109.79	97.1212	74.4672	97.5635	75.4124	109.71	140.198	84.7272	127.91	114.238	108.571	142.359	136.928	90.1922	70.9079	92.0203	85.3381	85.122
ENSCPOG00000001425	2576.91	5710.19	4477.67	7823.82	4875.46	6362.01	3298.46	7308.57	4497.49	4548.09	2945.58	5946.65	6828.65	6477.6	6168.87	3756.05	7253.7	5186.87	5758.06	5033.22	8151.18	3179.34	5129.57
ENSCPOG00000001426	313.04	444.115	479.969	646.471	378.03	704.487	274.871	346.861	215.214	437.213	295.941	737.831	603.906	632.442	541.032	480.816	526.398	386.677	479.443	490.135	675.951	430.66	500.092
ENSCPOG00000001427	49886.8	47879.3	66313.3	66291.7	59954.1	74259.8	53971.9	60339	49207.4	58755.3	32689.9	61980.8	80887.4	72437.9	67869.4	54988.8	67463.3	60538.5	73091.7	78174.1	72156.4	59563	62111
ENSCPOG00000001429	4624.83	4174.47	3701.87	3724.77	4481.03	6016.84	5240.88	4640.48	5025.48	4742.9	3187.12	3845.72	4200.3	5251.4	4218.59	3407.07	3779.14	3808.91	4840	3566.54	2645.87	5744.44	4350.9
ENSCPOG00000001430	0	79.8991	0	0	0	0	3.66495	9.79832	17.2171	4.48884	460.045	17.3968	0	0	95.9601	1.29252	21.5194	80.9996	16.1397	0	13.6326	10.9153	7.73837
ENSCPOG00000001432	733.149	366.291	462.515	438.542	466.134	464.113	410.474	409.57	462.949	525.194	463.732	387.847	807.612	471.371	408.516	738.026	370.796	490.819	450.961	742.667	619.149	855.366	486.55
ENSCPOG00000001434	48.9976	35.2801	45.3788	17.9575	60.4438	72.3617	30.2358	24.4958	47.8253	31.4219	40.5651	28.6536	54.0812	27.6348	28.3311	34.8979	14.0704	35.6784	51.2671	26.124	46.5782	73.4305	34.8227
ENSCPOG00000001436	2570.56	4572.93	4439.27	4870.27	3972.9	6228.1	3336.02	5422.39	3562.03	4097.41	2291.93	4881.35	5548.73	5698.3	5127.01	4129.59	4807.1	4734.62	5169.44	5024.51	5483.73	4779.93	4223.21
ENSCPOG00000001437	470.921	1042.84	698.136	798.638	746.839	1060.47	959.301	835.797	959.375	673.325	975.405	837.095	1016.73	1228.56	1064.7	1043.06	1008.93	851.46	1129.78	1102.18	1224.67	735.297	700.322
ENSCPOG00000001438	0	0	0	1.89027	11.2692	5.82221	1.83248	0	3.82602	0	0	5.11672	1.80271	2.3687	1.82781	2.58503	0	0	0	0	1.13605	2.97691	9.67296
ENSCPOG00000001442	2643.15	3688.85	3529.08	3575.44	3312.11	3771.96	2906.31	4402.39	2747.08	3749.97	2640.42	4855.76	4306.66	4919	4054.09	2670.34	4561.29	3568.8	4048.2	3519.27	4065.93	3603.05	3684.43
ENSCPOG00000001443	929.14	1872.96	1241.81	1655.87	1726.23	1851.46	1123.31	1371.76	1688.23	1387.95	1260.28	2338.34	1737.81	1637.56	1527.14	1972.38	1767.07	1419.42	1669.03	1455.48	1955.15	1729.58	1585.4
ENSCPOG00000001446	15.4252	184.702	103.848	160.673	175.184	177.162	111.781	87.205	119.563	137.358	62.6914	186.249	97.3461	109.75	139.828	56.8707	169.672	27.9641	102.534	97.0319	90.8842	55.569	95.7623
ENSCPOG00000001448	0	0	0	12.2867	0	0	0	0	4.78253	0	0	0	0	0	0	0	0	2.89284	0	0	3.40816	0	0
ENSCPOG00000001449	283.097	341.387	118.683	77.501	124.985	86.5014	105.367	68.5882	162.606	100.55	426.855	125.871	147.822	45.0053	74.0264	127.959	132.427	377.034	80.6983	99.5199	74.9795	132.969	74.4818
ENSCPOG00000001452	9291.4	7619.47	7431.66	8133.82	6228.78	5261.61	9422.59	6671.68	8266.12	7921.9	14424.6	6030.56	5056.59	5193.76	6739.14	5016.25	5576.84	6310.25	5358.36	4064.14	3908.02	4724.36	8183.32
ENSCPOG00000001453	604.304	704.565	558.509	486.744	583.948	568.081	490.187	490.896	598.772	439.008	558.691	515.765	526.39	574.804	517.271	523.469	423.767	377.034	569.635	544.871	621.421	515.005	422.708
ENSCPOG00000001454	243.173	185.74	187.624	137.044	129.083	189.638	159.425	128.358	238.17	118.505	217.576	169.875	142.414	117.645	165.417	324.421	213.539	176.463	289.564	250.044	203.353	283.799	131.552
ENSCPOG00000001455	2026.14	962.94	356.049	136.099	258.167	558.1	282.201	268.474	758.509	357.311	1507.36	597.633	701.252	103.433	159.02	368.367	905.471	3592.91	129.117	271.192	284.013	352.268	278.581
ENSCPOG00000001456	744.038	447.228	634.431	503.756	520.431	577.23	834.693	575.161	789.117	655.37	739.39	828.908	497.547	576.383	704.622	757.414	614.958	674.032	787.995	761.327	704.353	619.197	622.939
ENSCPOG00000001458	5251.82	4167.21	4256.01	3638.76	4474.89	3276.24	4656.32	4209.36	4405.66	4424.2	6687.7	3315.63	3886.63	3122.73	3673.9	5544.89	3248.6	3966.09	3687.44	4362.7	3635.37	4516.97	4324.78
ENSCPOG00000001459	183.287	191.965	315.034	182.411	190.552	160.527	213.483	227.321	307.995	183.145	436.996	242.532	246.971	195.023	296.106	271.428	159.74	188.999	228.803	349.564	241.979	230.214	259.235
ENSCPOG00000001461	3323.67	2539.13	3288.22	2609.51	2694.36	2681.54	2592.95	3701.81	3753.33	2455.39	2870.9	3368.85	1930.7	2518.72	2477.6	3114.96	2686.62	3127.16	3113.05	3015.45	2687.9	2338.86	2967.66
ENSCPOG00000001463	189.639	2.0753	0	10.3965	0	11.6444	13.7436	2.9395	58.3468	8.0799	295.019	21.4902	0	0	0	12.9252	0	58.8211	1.89878	0	1.13605	0	8.70566
ENSCPOG00000001464	1098.82	1128.96	1613.57	1217.33	1411.72	1327.46	1293.73	1404.1	1549.54	1133.88	1195.75	1349.79	1072.61	1240.41	1214.58	1414.01	1376.41	1440.64	1227.56	1426.87	1149.69	1306.86	1646.34
ENSCPOG00000001466	237.729	561.369	317.652	488.634	296.072	427.516	270.29	362.538	330.951	481.203	221.264	442.084	567.852	696.397	573.933	359.319	652.204	427.176	479.443	380.664	550.986	374.098	414.003
ENSCPOG00000001470	1475.37	1255.56	1090.84	1193.7	1161.75	944.861	1118.73	1110.15	1354.41	992.033	1488	1156.38	1117.68	990.116	1039.11	1526.46	1196.81	1494.64	1073.76	1438.06	1318.96	1353.5	1190.74
ENSCPOG00000001472	2473.47	1815.89	2434.75	2596.28	2307.11	2066.05	2253.03	2698.46	2429.52	2526.32	2882.88	2658.65	3457.59	2296.06	2126.66	3350.2	2261.19	2363.45	2295.63	3445.88	3407.02	3448.25	2643.62
ENSCPOG00000001474	4877.98	4291.73	4734.23	4989.36	5291.39	4685.21	5293.11	5303.83	4718.44	5373.14	6077.38	4483.27	9440.77	5221.4	4696.56	9047.61	4888.22	4603.48	5124.81	9160.81	7829.68	9641.22	4463.1
ENSCPOG00000001476	156.066	253.187	194.605	231.558	256.118	315.231	156.677	323.345	219.996	254.068	245.234	155.548	416.425	327.67	254.98	200.34	242.507	192.856	277.222	257.508	355.585	214.338	242.791
ENSCPOG00000001477	2827.34	2904.39	2800.4	2305.18	2896.18	3067.47	2463.76	2422.14	2676.3	2870.16	2707.72	3197.95	2731.1	2862.18	2640.27	2877.14	2759.45	2253.52	2693.42	2565.13	2480	3161.48	2455
ENSCPOG00000001479	0.907363	0	0	1.89027	0	0	2.74871	0	37.3037	0	25.8141	0	0	3.94783	0	0	0	22.1785	0	6.21999	7.95237	0	0
ENSCPOG00000001481	195.99	257.337	187.624	289.211	266.362	266.99	200.656	295.909	233.387	239.704	188.996	211.832	225.338	277.138	276.914	130.544	394.798	252.642	225.006	179.136	235.163	218.307	214.74
ENSCPOG00000001482	1891.85	1455.82	1980.96	1853.41	1754.92	1837.32	1896.61	2076.26	1657.62	2344.07	2349.09	1966.87	2325.49	1661.25	1857.06	2040.88	2002.13	2172.52	1971.89	1867.24	1749.52	1836.75	2014.88
ENSCPOG00000001483	2.72209	15.5648	12.2174	16.0673	10.2447	2.49523	4.58119	1.95966	3.82602	26.0352	11.0632	23.5369	9.01353	15.7913	6.39734	3.87755	20.6917	22.1785	5.69635	4.97599	11.3605	18.8538	6.77107
ENSCPOG00000001485	9283.23	10314.3	7423.8	7384.33	8159.91	8446.36	7042.2	8162.98	8661.16	7617.55	6721.81	10340.9	8753.94	8502.84	7175.08	9631.82	7964.66	7883	9345.81	8614.69	8714.66	10263.4	8175.59
ENSCPOG00000001489	303.059	35.2801	5.23602	47.2567	47.1256	4.99046	27.4871	69.5681	1.91301	84.3901	136.446	49.1205	12.6189	0	0.913906	3.87755	1.65534	263.249	0	3.732	0	0	0
ENSCPOG00000001491	2204.89	1779.57	1687.74	2018.81	1988.5	2334.71	1942.42	1933.21	1585.89	2161.82	1322.97	2433.51	1934.3	2679	2266.49	2025.37	2085.73	2254.49	2026	1950.59	1861.99	1800.04	2014.88
ENSCPOG00000001492	2378.2	3148.23	2294.25	2630.31	1957.76	2536.82	1856.3	1848.94	2270.74	1955.34	1456.65	3352.47	2006.41	2525.82	2319.49	1892.24	2279.4	2607.42	2199.74	1862.27	2231.21	1937.97	2680.38
ENSCPOG00000001493	134.29	238.66	154.463	165.398	287.876	266.99	145.682	164.612	165.475	406.689	373.383	190.342	183.876	240.028	424.966	325.714	246.646	564.104	92.0909	210.236	247.66	115.107	104.468
ENSCPOG00000001494	2484.36	2389.71	2838.8	2470.58	2202.61	2002.84	1644.65	1808.77	1952.23	3191.56	3762.41	2443.74	2540.01	2015.76	2066.34	1217.55	3699.68	1860.1	2001.32	1841.12	2234.62	1720.65	1762.41
ENSCPOG00000001495	170.584	197.154	173.661	120.977	165.964	190.469	153.928	219.482	210.431	127.483	260.907	117.685	171.257	179.231	185.523	210.68	192.019	215.035	189.878	221.432	205.626	254.03	182.819
ENSCPOG00000001496	706.836	844.648	1076.87	1205.05	1136.14	1189.39	615.712	1190.5	677.206	767.591	668.401	1144.1	836.455	1395.95	1076.58	529.931	1172.81	799.389	1239.9	756.351	1125.83	778.958	1113.36
ENSCPOG00000001497	2042.47	1737.03	2335.26	2106.7	2289.69	3231.33	1788.5	2583.82	1778.14	2670.86	1126.6	1990.4	2668	3095.89	2672.26	1720.34	2508.67	2425.17	2565.26	1801.31	2333.45	1914.15	2477.25
ENSCPOG00000001498	270.394	427.512	384.847	365.767	415.935	390.088	415.056	340.002	487.818	424.644	375.227	303.933	539.009	387.677	436.847	440.748	403.903	434.891	400.643	435.4	453.285	313.568	396.591
ENSCPOG00000001499	323.021	501.185	512.257	578.422	641.319	469.104	386.652	402.711	254.43	552.127	578.974	437.991	670.606	567.698	415.827	392.925	561.988	483.105	343.68	359.516	438.516	475.313	434.316
ENSCPOG00000001500	1212.24	585.235	834.273	879.919	859.531	570.576	1279.07	719.197	832.16	994.726	1770.11	495.298	908.564	553.486	655.271	1055.99	480.048	709.711	658.877	772.523	540.761	762.089	883.141
ENSCPOG00000001502	376.556	593.536	376.121	450.829	514.284	444.151	372.909	529.109	427.558	416.564	396.431	423.664	526.39	418.47	389.324	501.496	456.046	342.32	359.819	493.867	405.571	560.651	369.507
ENSCPOG00000001503	1064.34	1527.42	1452.12	1635.08	1519.29	1710.07	1121.47	1412.92	1205.2	1233.53	1066.68	1398.91	1791.89	1489.12	1417.47	1412.72	1614.78	1508.14	1166.8	1349.74	1566.62	1282.06	1218.79
ENSCPOG00000001504	15270	11690.2	11322	13435.1	13210.5	11630.3	15089.5	14750.4	14227.1	13138.8	8522.35	16491.2	12543.2	13500	14046.7	13439.6	10047.9	16906.7	16311.5	18969.7	15561.7	12383.9	14819.9
ENSCPOG00000001506	191.454	368.366	434.59	431.926	412.862	467.44	465.449	540.867	389.298	440.804	218.498	584.329	645.369	593.754	424.052	268.843	406.386	485.998	466.151	404.3	364.673	325.476	431.414
ENSCPOG00000001508	1049.82	892.38	839.509	919.615	973.247	929.058	839.274	772.108	1070.33	867.243	895.197	831.978	892.339	821.938	791.443	1134.83	822.704	817.71	906.669	906.875	850.904	937.727	921.833
ENSCPOG00000001509	66.2375	66.4097	42.7608	53.8726	65.5661	52.3999	41.2307	68.5882	72.6944	91.5723	74.6766	59.3539	55.8839	61.5861	60.3178	38.7755	67.0412	37.607	57.9129	54.7359	48.8503	69.4612	50.2994
ENSCPOG00000001510	321.207	401.571	368.267	443.268	407.739	421.694	177.75	434.066	386.428	363.596	198.216	406.267	310.065	246.345	353.682	338.639	458.529	418.498	373.111	235.116	390.802	296.699	328.881
ENSCPOG00000001512	980.86	1433	1357	1761.73	1343.08	1502.13	1230.51	1285.54	1042.59	1422.06	823.286	1498.17	1496.25	1901.27	1724.54	1158.09	1689.27	1472.46	1339.59	1622.17	1767.7	1261.22	1506.08
ENSCPOG00000001514	54.4418	132.819	176.279	198.478	168.013	139.733	65.0529	145.995	171.214	181.349	93.1152	198.529	218.127	204.498	217.51	179.66	193.675	116.678	168.042	164.208	215.85	167.699	184.754
ENSCPOG00000001515	97.9952	21.7907	112.574	137.044	65.5661	76.5205	100.786	42.1328	38.2602	107.732	62.6914	63.4473	50.4758	86.8523	39.298	29.7279	91.0437	61.714	51.2671	37.32	49.9863	79.3843	92.8604
ENSCPOG00000001517	730.427	890.305	1034.11	1117.15	818.552	1202.7	840.19	1073.9	827.377	942.656	614.929	1175.82	1056.39	1362	1107.65	594.557	1107.42	839.889	1043.38	796.159	953.148	791.858	873.468
ENSCPOG00000001519	9.07363	32.1672	49.7422	19.8478	8.19576	31.6063	16.4923	50.9513	27.7387	21.5464	42.4089	10.2334	18.0271	22.8974	32.9006	18.0952	24.8301	30.857	9.49391	19.904	23.8571	9.92303	17.4113
ENSCPOG00000001523	11002.7	1049.07	1013.17	237.229	177622	5453.75	5638.53	8499.06	29011.8	43196.1	6676.64	658.01	2417.43	556.644	783.217	3809.04	68693.3	291418	87775	441.62	5557.57	75.4151	1079.5
ENSCPOG00000001525	1586.98	1658.17	1480.92	1412.03	1692.43	1596.12	1380.77	1615.74	1420.41	1211.99	1218.8	2048.73	1087.03	1309.1	1175.28	1476.05	1150.46	1368.31	1662.38	1421.89	997.454	1533.11	1814.65
ENSCPOG00000001529	979.045	2077.38	1609.2	2243.75	1337.96	1446.4	1773.84	1873.44	1691.1	1187.75	1177.31	2187.91	1799.1	1911.54	1689.81	1562.65	1829.15	1612.28	1734.54	1635.86	1616.6	1335.64	2244.13
ENSCPOG00000001533	10827.6	13717.7	11959.9	12615.6	13607	15430.5	9253.08	10678.2	9374.71	10572.1	8143.43	11537.2	9648.08	11515	11055.5	10390.5	13944.6	10313.9	12157.9	9490.47	10252.9	11681.4	11798.1
ENSCPOG00000001534	1274.85	1098.87	1188.58	1058.55	1362.55	1364.89	1187.44	1511.88	1295.11	1141.96	641.665	1441.89	1465.6	1463.07	1151.52	1293.81	941.06	1221.74	1381.36	1491.55	1124.69	859.335	1311.65
ENSCPOG00000001535	2124.14	1414.32	3865.06	2631.25	2167.78	1686.78	2012.06	1397.24	2702.13	2405.12	1558.07	1429.61	735.504	1690.46	2181.49	1382.99	2961.4	2427.09	1921.57	1318.64	1132.64	1171.91	1976.19
ENSCPOG00000001537	12.7031	45.6566	16.5807	21.7381	11.2692	14.9714	11.9111	13.7176	13.3911	2.6933	18.4387	21.4902	7.21082	7.89566	16.4503	7.75509	9.93203	13.4999	12.3421	9.95199	5.68026	7.93843	10.6403
ENSCPOG00000001540	1738.51	1229.62	1042.84	896.932	1188.39	1033.86	1386.27	984.731	1335.28	1174.28	1824.51	1080.65	906.761	938.794	919.389	988.774	1001.48	1226.57	1064.27	758.839	805.462	928.796	1122.06
ENSCPOG00000001541	0	22.8283	0	0.945134	10.2447	0.831744	0.916238	0	0	3.59107	10.1413	4.09337	0	4.7374	2.74172	0	4.96602	5.78569	0	0	6.81632	7.93843	10.6403
ENSCPOG00000001542	2432.64	1609.4	1889.33	1619.96	1917.81	1370.71	2072.53	1501.1	1710.23	2041.52	2800.83	1375.37	1449.38	1538.86	1737.34	1678.98	1535.33	1754.99	1600.67	1403.23	1207.62	1611.5	1894.93
ENSCPOG00000001544	531.715	548.917	513.13	608.666	450.767	514.85	574.481	543.807	587.294	467.737	786.409	480.971	605.709	465.844	524.582	589.387	526.398	479.248	525.013	552.335	499.863	560.651	526.209
ENSCPOG00000001545	1986.22	3660.83	4275.21	4972.35	4632.66	4322.57	2679.08	4930.51	3245.42	4984.4	3466.47	4238.69	6769.16	5866.48	5057.56	2618.64	5417.93	3795.41	4202.01	4274.38	5422.38	3316.28	4467.94
ENSCPOG00000001550	1.81473	25.9413	5.23602	24.5735	4.09788	14.9714	5.49743	10.7782	10.5216	6.28437	11.9851	25.5836	19.8298	12.6331	10.053	31.0204	14.8981	6.74997	0.949391	19.904	22.7211	15.8769	7.73837
ENSCPOG00000001551	430.09	335.161	565.49	523.604	493.795	469.104	422.386	515.392	459.123	593.424	311.613	460.505	414.622	609.545	583.986	246.87	529.709	549.64	409.188	464.012	490.775	318.529	461.4
ENSCPOG00000001552	2507.95	3576.78	2153.75	2660.55	2096.07	2456.14	1719.78	2903.24	3095.25	2460.78	2648.71	2317.87	2386.78	2650.57	3229.74	2684.55	2439.97	2214.95	2306.07	1915.76	2709.49	1630.35	2146.43
ENSCPOG00000001553	96.1805	254.225	157.081	323.236	234.604	240.374	260.212	272.393	335.733	185.838	184.387	188.295	259.59	209.235	276.914	217.143	223.471	212.142	104.433	241.336	268.108	202.43	236.02
ENSCPOG00000001555	1249.44	1016.9	1070.77	1014.13	889.24	1036.35	1042.68	1030.78	1107.63	827.741	885.056	1037.67	416.425	960.902	923.959	507.959	1024.65	782.996	1300.67	617.023	514.632	659.882	1113.36
ENSCPOG00000001557	950.917	619.478	758.35	756.107	665.906	697.002	950.139	740.753	776.682	734.374	578.974	684.617	436.255	751.667	640.648	558.367	708.485	554.462	820.274	590.899	491.911	614.236	838.646
ENSCPOG00000001558	2702.13	2225.76	2892.9	3056.56	3698.34	3593.97	2547.14	2808.2	2202.83	3742.79	1836.49	2898.11	3506.26	4115.22	3246.19	2501.02	3438.14	2959.38	3920.04	3142.34	2825.36	2692.12	3120.5
ENSCPOG00000001562	476.366	269.789	319.397	267.473	315.537	178.825	519.507	324.324	505.035	318.707	559.613	343.843	326.29	201.339	445.986	495.033	264.854	392.462	218.36	400.568	349.904	299.676	388.853
ENSCPOG00000001563	2159.52	2610.73	2325.67	2459.24	2389.07	2723.13	3019.92	2550.5	2611.26	3246.33	3035	2201.21	2658.99	2710.58	2672.26	2808.64	2082.42	2871.63	2902.29	2759.19	2290.28	2633.57	2541.09
ENSCPOG00000001564	1091.56	1134.15	1244.43	1296.72	1221.17	1169.43	1054.59	1126.81	964.157	1202.11	1361.7	1213.69	1680.12	1446.48	1030.89	1328.71	1417.8	1226.57	992.114	1282.56	1579.11	1349.53	1155.92
ENSCPOG00000001565	74.4038	184.702	13.0901	24.5735	60.4438	155.536	28.4034	110.721	89.9115	204.691	109.71	101.311	41.4622	168.178	46.6092	33.6054	81.9393	75.2139	204.119	307.268	206.762	73.4305	54.1686
ENSCPOG00000001566	45.3682	42.5437	13.9627	8.5062	51.2235	34.9333	27.4871	32.3345	63.1293	68.2303	8.2974	1.02334	16.2243	27.6348	21.0198	42.653	30.6238	54.964	30.3805	51.0039	52.2584	37.7075	66.7434
ENSCPOG00000001567	1282.1	1499.41	1421.58	1730.54	1744.67	1873.92	1606.16	1719.61	1439.54	1628.55	1336.8	1444.96	2224.54	1658.88	1595.68	1659.59	1855.64	1356.74	1425.99	1725.43	2075.57	2046.13	1603.78
ENSCPOG00000001568	534.437	484.583	563.745	713.576	606.487	481.58	477.36	596.718	668.597	716.418	622.305	486.088	892.339	668.762	615.059	740.611	479.221	565.069	592.42	508.795	854.312	617.213	577.476
ENSCPOG00000001571	142.456	349.688	294.09	228.722	300.17	349.333	177.75	319.425	185.562	306.139	429.621	187.272	338.909	190.285	232.132	316.666	213.539	236.249	340.831	288.608	332.863	275.86	169.277
ENSCPOG00000001572	1191.37	312.333	51.4875	81.2815	45.0767	34.1015	45.8119	98.963	132.954	93.3678	1620.76	236.392	23.4352	20.5287	42.0397	27.1428	43.8665	466.712	59.8116	13.684	14.7687	1.98461	22.2478
ENSCPOG00000001574	875.605	634.005	694.645	701.289	572.679	643.77	760.477	794.644	781.465	737.965	868.461	634.473	710.266	609.545	672.635	864.693	715.107	619.068	675.967	639.415	774.788	673.774	857.992
ENSCPOG00000001577	466.385	127.631	16.5807	413.969	10.2447	229.561	12.8273	99.9429	50.6948	102.345	30.4238	383.754	18.0271	18.9496	31.9867	3.87755	25.6578	101.249	134.814	70.9079	216.986	103.2	149.931
ENSCPOG00000001582	1697.68	1580.34	1539.39	1381.79	1665.79	1581.15	1674.88	1503.06	1701.62	1475.03	1530.41	1635.3	1570.16	1679.41	1545.42	2038.3	1484.01	1578.53	1680.42	1730.4	1699.54	2008.42	1812.71
ENSCPOG00000001587	313.04	369.404	260.928	322.291	299.145	246.196	291.364	272.393	338.603	324.992	186.23	241.509	284.827	273.19	254.066	374.829	293.823	261.32	294.311	282.388	285.149	244.107	299.862
ENSCPOG00000001588	2093.29	2557.81	2805.63	3199.28	3071.36	3835.17	2073.45	2516.21	2046.92	2935.7	1388.43	2780.42	3455.79	3268.8	3635.52	2148.16	3244.46	2671.06	2408.61	2475.56	3065.07	2096.74	2379.55
ENSCPOG00000001591	1682.25	1794.1	1954.78	2114.26	2120.65	2205.79	1666.64	1834.25	1419.45	1746.16	1355.24	2161.3	2330.9	2236.05	1974.95	1655.71	2244.64	1771.38	1767.77	1996.62	2407.3	1771.26	1795.3
ENSCPOG00000001592	776.703	1686.18	1319.48	1772.13	1402.5	1517.1	1079.33	1909.69	1531.36	1437.33	1198.51	1853.28	1739.61	2155.52	1829.64	1187.82	1623.89	1724.13	1773.46	1480.36	1863.13	1108.4	1854.31
ENSCPOG00000001593	3708.39	2798.55	2892.03	2748.45	2947.4	2531.83	3640.21	2822.9	3027.34	3234.66	4956.31	2321.97	3053.78	2717.69	2703.33	3780.61	2266.16	3327.73	2968.75	3255.54	2750.38	2886.61	2893.18
ENSCPOG00000001594	37.2019	44.619	28.7981	43.4761	35.8565	49.9046	53.1418	40.1731	52.6078	43.0928	55.316	40.9337	25.2379	22.1078	31.0728	27.1428	31.4514	21.2142	48.419	59.7119	49.9863	43.6613	27.0843
ENSCPOG00000001596	1471.74	1988.14	1627.53	1947.92	1938.3	2265.67	1307.47	1797.99	1611.71	1797.33	1050.08	2449.88	2276.82	2187.89	1995.97	1498.03	1973.99	1601.67	1853.21	1612.22	2038.08	1859.58	2057.44
ENSCPOG00000001597	29.0356	0	0	0	0	5.82221	7.3299	0	1.91301	0	0	0	0	0	4.56953	0	0	3.85712	0	4.97599	0	0	0
ENSCPOG00000001598	947.287	1422.62	959.064	1080.29	988.614	1078.77	864.928	1153.26	1018.68	934.576	1417.01	1279.18	1429.55	1035.12	1377.26	882.788	1167.84	1206.32	979.772	835.967	1339.41	1008.18	1082.4
ENSCPOG00000001600	1220.4	963.978	1593.5	1358.16	1192.48	1335.78	1642.81	1354.13	1337.19	1355.63	1307.3	899.519	1011.32	1248.3	1447.63	1351.97	1392.97	1225.6	1740.23	1369.64	991.774	1181.83	1351.31
ENSCPOG00000001602	156.066	340.35	327.251	262.747	324.757	403.396	169.504	379.195	182.693	214.566	172.401	113.591	252.379	420.839	334.49	199.047	359.209	216.963	356.971	197.796	306.734	184.568	312.437
ENSCPOG00000001605	41.7387	15.5648	0.87267	4.72567	2.04894	0	3.66495	9.79832	2.86952	2.6933	14.7509	22.5136	10.8162	0	1.82781	5.17006	1.65534	33.7498	4.74696	2.488	0	0	0
ENSCPOG00000001606	275.838	710.791	816.819	648.362	749.912	626.303	690.843	552.625	794.856	834.923	647.197	761.368	392.99	826.676	646.132	545.441	743.247	635.461	610.459	653.099	506.68	603.32	802.856
ENSCPOG00000001607	441.886	447.228	475.605	514.153	524.529	617.986	543.329	548.706	541.382	573.673	564.223	587.399	715.674	503.743	646.132	612.652	520.604	534.212	461.404	575.971	588.475	609.274	542.653
ENSCPOG00000001608	814.812	870.589	545.419	557.629	512.235	461.618	702.754	544.787	752.77	574.571	959.732	649.823	441.663	497.427	560.224	624.285	478.393	544.819	603.813	594.631	453.285	502.106	582.312
ENSCPOG00000001609	26.3135	46.6943	34.9068	31.1894	9.22023	24.1206	32.9846	42.1328	43.9992	20.6486	24.8922	31.7236	34.2514	20.5287	30.1589	45.238	33.9345	32.7855	27.5323	37.32	35.2176	26.7922	17.4113
ENSCPOG00000001610	110.698	157.723	160.571	120.977	163.915	225.403	61.3879	105.822	98.52	169.678	135.524	187.272	281.222	244.765	204.715	140.884	212.711	173.571	137.662	176.648	221.53	161.745	187.655
ENSCPOG00000001614	5756.31	7472.13	7685.6	10683.8	6372.21	7996.39	7898.89	10544	5905.46	7894.96	5614.57	8607.34	7547.93	10148.3	9636.23	4633.67	8313.11	9100.88	7262.84	7850.88	8829.4	7236.87	11438.3
ENSCPOG00000001620	665.097	481.47	644.03	749.491	693.567	826.754	479.192	516.371	395.037	786.444	515.361	768.531	746.32	904.053	576.675	351.564	914.575	573.747	619.003	429.18	487.367	463.406	619.069
ENSCPOG00000001621	1871.89	1679.96	1410.23	1487.64	1523.39	1408.97	1680.38	1559.89	1371.63	1537.88	1692.67	1185.03	1791.89	1216.72	1224.63	1530.34	1309.37	1413.64	1266.49	1579.88	1397.35	1725.62	1210.09
ENSCPOG00000001624	0	11.4142	0	0	0	0	0	3.91933	0	0	0	0	0	0.789566	4.56953	0	0	8.67853	0	0	0	0	1.93459
ENSCPOG00000001630	788.499	1053.22	1046.33	1099.19	1038.81	959.833	1044.51	1240.47	1144.94	1045.9	1520.27	1033.58	1303.36	1230.14	1050.08	1118.03	987.41	978.745	882.934	1225.34	1274.65	1032	1077.57
ENSCPOG00000001631	0	0	3.49068	0	0	0	0	0.979832	0	0	0	0	0	2.3687	12.7947	0	0.82767	10.6071	0.949391	6.21999	1.13605	3.96921	0
ENSCPOG00000001632	672.356	521.939	695.518	706.96	583.948	741.916	623.042	613.375	587.294	623.05	342.959	435.944	555.233	853.521	734.78	524.761	703.519	515.89	655.08	568.507	599.836	776.974	557.162
ENSCPOG00000001636	318.484	138.008	132.646	173.905	82.9821	110.622	73.299	135.217	255.387	144.541	388.134	165.782	133.4	155.544	182.781	186.122	233.403	242.999	153.801	181.624	257.884	145.869	176.048
ENSCPOG00000001637	7353.27	5568.04	7921.23	6426.91	7294.23	7163.81	7237.36	6557.04	6908.84	7614.86	6155.75	6802.16	8068.91	6945.02	6868	8145.43	7146.93	6669.93	7976.78	7345.81	6825.41	8308.56	6991.62
ENSCPOG00000001639	0.907363	0	0	0	0	4.15872	0.916238	0	0	0	0.921933	0	0	1.57913	0	5.17006	0	0	1.89878	0	0	0	1.93459
ENSCPOG00000001640	1872.8	1790.99	1756.68	1774.96	1791.8	1805.72	1661.14	1656.9	1738.93	1562.11	1958.19	2072.27	1871.21	1506.49	1878.99	2104.22	1558.5	1687.49	1901.63	1900.83	1768.83	1982.62	1663.75
ENSCPOG00000001641	636.969	629.854	981.754	698.454	789.867	922.404	727.493	883.808	977.548	784.649	729.249	734.761	730.096	842.467	882.833	886.666	758.973	728.032	825.021	1015.1	830.455	802.773	940.212
ENSCPOG00000001642	387.444	625.704	644.03	593.544	621.854	632.126	429.715	694.701	490.687	725.396	651.807	733.737	804.007	724.822	702.794	652.72	734.143	604.604	748.12	674.247	661.183	671.789	725.472
ENSCPOG00000001644	684.152	1031.43	951.21	1147.39	1108.48	1345.76	759.561	1829.35	712.596	1060.26	462.81	854.492	1694.54	1709.41	1558.21	872.448	1695.89	1295.99	1201.93	1375.86	1814.28	936.734	1286.5
ENSCPOG00000001645	226.841	40.4684	195.478	98.2939	103.472	107.295	139.268	96.0235	158.78	125.687	127.227	149.408	70.3055	141.332	106.013	59.4557	125.806	193.82	145.257	84.5919	79.5237	104.192	105.435
ENSCPOG00000001646	239.544	34.2425	0	12.2867	1.02447	2.49523	0	0	14.3476	79.9013	27.658	0	0	0	14.6225	10.3401	2.48301	67.4997	22.7854	1.244	11.3605	0	0
ENSCPOG00000001648	155.159	353.839	420.627	614.337	485.599	477.421	277.62	408.59	433.297	471.328	292.253	513.718	571.458	645.865	559.311	386.462	562.815	410.784	401.592	399.324	503.271	319.522	466.237
ENSCPOG00000001651	0	0	0	0	0	0	8.24614	0	16.2606	0	0	5.11672	0	0	0	0	0	0.964281	0	0	0	0	0
ENSCPOG00000001655	56.2565	91.3133	12.2174	7.56107	17.416	8.31744	5.49743	24.4958	4.78253	48.4794	435.152	46.0505	32.4487	7.89566	0	1.29252	14.8981	81.9639	2.84817	7.46399	15.9047	16.8692	1.93459
ENSCPOG00000001660	6427.76	4955.82	6627.06	4929.82	7807.49	6408.59	5194.15	6510.98	5498.95	6128.16	5081.69	5730.72	6405.01	6806.85	6263.91	5458.29	6727.3	5619.83	6686.56	5974.93	5200.85	6090.76	6594.06
ENSCPOG00000001663	891.938	1834.57	2562.16	2835.4	2226.17	1902.2	1483.39	2206.58	1181.28	2878.24	1528.56	2475.47	2826.64	2836.12	1666.05	1827.62	2125.46	2275.7	2766.53	1818.73	2647	2022.31	2209.3
ENSCPOG00000001664	382.907	374.592	295.835	258.021	163.915	348.501	278.536	234.18	209.475	237.908	346.647	280.396	248.773	273.19	265.033	328.299	246.646	303.748	147.156	225.164	353.312	292.73	238.922
ENSCPOG00000001665	57.1639	81.9744	73.3043	96.4036	50.1991	98.1458	32.9846	69.5681	49.7383	34.1152	95.881	66.5173	61.292	59.2174	81.3376	84.0135	67.8689	31.8213	46.5202	89.5679	59.0748	70.4535	70.6126
ENSCPOG00000001668	112.513	86.125	123.046	91.678	104.496	83.1744	158.509	57.8101	115.737	104.141	130.914	38.8871	97.3461	94.7479	100.53	121.496	93.5267	104.142	87.344	116.936	59.0748	108.161	73.5145
ENSCPOG00000001669	2791.96	2437.44	2899.88	2697.41	2432.09	2681.54	2741.38	2586.76	2399.87	2917.74	2754.74	2501.05	3102.46	2847.17	2714.3	2813.81	2910.09	2353.81	2478.86	2886.08	2694.72	3115.83	2800.32
ENSCPOG00000001670	936.399	687.963	656.248	657.813	653.612	658.741	736.655	648.649	771.9	603.3	842.647	728.621	859.89	679.027	611.403	895.713	567.781	641.247	577.23	700.371	749.795	684.689	622.939
ENSCPOG00000001671	3255.62	2946.93	3370.25	3312.69	3762.88	3568.18	3404.74	2981.63	3330.55	3388.17	2609.99	3432.29	3500.85	3484.35	3698.58	3288.16	3143.49	3050.02	3412.11	3154.78	2961.69	3915.63	3264.62
ENSCPOG00000001672	356.594	196.116	257.438	259.912	252.02	182.152	303.275	309.627	427.558	208.282	414.87	294.723	232.549	156.334	286.053	221.02	237.541	350.998	133.864	177.892	257.884	179.607	239.889
ENSCPOG00000001674	0	0	9.59937	0	0	8.31744	3.66495	8.81849	0	0	0	0	0	0	7.31125	0	0	17.3571	0	0	0	8.93073	0
ENSCPOG00000001676	2286.56	2291.13	2498.45	2603.84	3054.97	2667.4	2351.98	2545.6	2381.7	3012.01	3105.07	1845.09	3444.97	2868.49	2379.81	2949.52	2369.62	2337.42	2447.53	2769.14	2426.61	3338.11	2378.58
ENSCPOG00000001677	780.332	700.415	706.863	779.735	601.364	779.344	691.759	672.165	809.203	648.188	872.149	730.667	537.206	832.992	714.675	513.129	786.286	676.925	700.651	624.487	548.714	696.597	783.51
ENSCPOG00000001679	4973.26	5243.25	5104.25	5887.24	5656.1	4997.12	5359.07	5580.14	4883.92	4931.44	5891.15	5468.75	6103.96	4999.53	5694.55	6091.63	5340.95	5450.12	5936.54	6262.29	6628.87	4757.1	5465.22
ENSCPOG00000001685	17.2399	0	0	1.89027	4.09788	4.99046	0	3.91933	7.65204	0.897767	11.0632	3.07003	0	0	0	2.58503	11.5874	15.4285	17.089	0	0	1.98461	0
ENSCPOG00000001688	87.1069	97.5392	73.3043	87.8974	62.4927	128.92	77.8802	65.6487	55.4773	97.8566	5.5316	84.9375	50.4758	95.5375	87.735	112.449	49.6602	61.714	92.0909	70.9079	44.3061	60.5305	92.8604
ENSCPOG00000001693	161.511	88.2003	61.9596	160.673	314.512	227.066	220.813	85.2454	131.998	95.1633	98.6468	122.801	72.1082	115.277	178.212	122.789	210.228	139.821	93.9897	99.5199	80.6598	98.238	159.604
ENSCPOG00000001694	293.986	178.476	239.112	185.246	264.313	182.984	295.029	288.071	237.213	119.403	248.922	213.879	216.325	191.075	207.457	218.435	244.163	282.534	230.702	232.628	263.564	181.592	234.086
ENSCPOG00000001698	392.888	830.121	312.416	483.908	480.477	640.443	545.161	509.513	626.511	539.558	843.569	586.376	623.736	562.961	516.357	960.339	656.342	471.533	374.06	700.371	753.203	609.274	414.003
ENSCPOG00000001699	58.0712	50.8449	0	5.6708	0	8.31744	19.241	0	42.0862	8.97767	75.5985	4.09337	0	0.789566	9.13906	0	29.7961	10.6071	0	0	0	0	4.83648
ENSCPOG00000001700	743.13	1204.71	772.313	1006.57	1410.7	1235.97	1111.4	1278.68	886.68	1670.74	1148.73	900.542	1589.99	1634.4	1379.08	1229.18	1781.14	1376.03	839.262	1098.45	1381.44	1201.68	822.202
ENSCPOG00000001701	389.259	293.655	617.85	577.477	680.248	850.043	411.391	782.886	312.777	594.322	245.234	561.816	838.258	975.114	970.568	407.142	852.5	537.104	644.637	513.771	710.033	479.283	586.181
ENSCPOG00000001702	850.199	796.916	1106.55	1289.16	1477.29	1313.32	1118.73	1273.78	943.114	1218.27	1190.22	1120.56	1328.59	1527.02	1239.26	1491.56	1157.91	1213.07	1079.46	1404.47	1399.62	1402.12	1249.75
ENSCPOG00000001703	0	0	2.61801	0	0	0	0	0	0	0	0	0	0	0	0	1.29252	0	10.6071	0	0	0	0.992303	0
ENSCPOG00000001705	1.81473	29.0542	32.2888	40.6407	47.1256	36.5967	41.2307	55.8504	9.56505	27.8308	108.788	41.9571	23.4352	56.8487	7.31125	21.9728	52.9709	43.3926	25.6336	36.076	42.034	21.8307	23.2151
ENSCPOG00000001706	345.705	277.053	278.382	275.034	276.607	197.955	285.866	268.474	303.212	286.388	520.892	203.645	407.411	264.505	250.41	386.462	233.403	291.213	275.323	359.516	360.129	378.068	291.156
ENSCPOG00000001707	3719.28	5014.97	4872.12	5611.26	4973.8	4631.98	4490.48	5011.84	4717.48	5313.88	5051.27	4839.39	6217.53	4871.62	5035.62	5440.2	5400.54	5894.65	5198.87	5535.79	5396.25	4868.24	4987.38
ENSCPOG00000001709	10.8884	8.30121	10.472	0	0	0	5.49743	9.79832	4.78253	0	29.5019	0	3.60541	0.789566	0	7.75509	0	0	0	0	0	1.98461	8.70566
ENSCPOG00000001710	4831.71	3922.32	4727.25	4434.57	4393.95	3563.19	5429.62	4362.21	4055.58	5236.68	7300.79	3310.52	4784.38	3436.98	3999.25	4868.91	3439.79	4110.73	3858.33	4143.76	3642.19	4390.94	4267.71
ENSCPOG00000001711	0	0	0	0	0	5.82221	0	0	0	0.897767	5.5316	0	3.60541	1.57913	3.65562	0	0	0	0	0	0	3.96921	0
ENSCPOG00000001712	668.727	731.544	947.72	883.7	473.305	508.196	769.64	811.301	772.856	587.14	1141.35	610.936	1058.19	709.82	673.549	1158.09	692.759	965.245	621.851	980.271	1090.61	839.489	805.758
ENSCPOG00000001713	4157.54	4111.17	5215.95	5290.86	4506.65	5244.15	5163.92	5232.3	4892.52	5189.99	5337.99	5257.94	5465.8	5748.83	5516.34	4563.87	5830.1	5156.01	5742.87	5069.29	5499.63	4565.59	5647.07
ENSCPOG00000001714	6.35154	11.4142	0.87267	3.78053	0	1.66349	9.16238	0.979832	2.86952	8.97767	0.921933	0	5.40812	5.52696	7.31125	1.29252	0.82767	10.6071	1.89878	2.488	3.40816	5.95382	2.90189
ENSCPOG00000001715	0	0	0	1.89027	0	0	0	0	0	0	1.84387	0	0	0	3.65562	0	0.82767	0	0	0	0	0	0
ENSCPOG00000001717	7.25891	4.1506	7.85403	0.945134	4.09788	4.99046	10.0786	2.9395	14.3476	3.59107	9.21933	13.3035	1.80271	1.57913	2.74172	0	1.65534	3.85712	3.79756	1.244	1.13605	1.98461	2.90189
ENSCPOG00000001721	256.784	98.5769	219.913	285.43	284.803	346.006	345.422	243.978	233.387	322.298	175.167	374.544	331.698	366.359	341.801	249.455	368.313	285.427	375.01	471.476	336.272	334.406	268.908
ENSCPOG00000001723	5488.64	4204.56	3875.53	4125.51	3619.45	3460.06	6224.92	3984.98	4116.8	3987.88	7615.17	3795.58	3661.29	3834.92	3889.58	4470.81	3089.69	3446.34	3465.28	3603.86	3021.9	3954.33	3930.12
ENSCPOG00000001724	1469.02	2349.24	2236.65	2290.06	2317.35	2029.46	1698.7	2275.17	1427.11	2221.08	1288.86	2158.23	2529.2	2464.24	2325.89	1678.98	2263.68	1847.56	2265.25	2006.57	2424.34	2502.59	2066.14
ENSCPOG00000001726	174.214	142.158	56.7236	41.5859	35.8565	32.438	65.0529	40.1731	139.65	36.8085	190.84	124.848	46.8703	38.6887	37.4701	42.653	48.0048	129.214	55.0647	82.1039	62.4829	61.5228	70.6126
ENSCPOG00000001728	4709.21	4937.14	4653.08	4648.17	5161.28	5089.44	4733.28	4860.95	4736.61	5298.62	4576.48	4718.64	5721.79	5310.62	4874.77	6027	5275.57	4810.8	5135.26	5411.39	5007.72	5772.23	5288.21
ENSCPOG00000001729	113.42	16.6024	6.10869	43.4761	8.19576	24.1206	48.5606	16.6571	78.4334	47.5817	92.1933	52.1905	16.2243	17.3705	0	16.8027	17.3811	118.607	5.69635	19.904	32.9455	3.96921	5.80378
ENSCPOG00000001730	2150.45	1542.99	1590	1375.17	1443.48	1479.67	1691.37	1542.26	1572.49	1506.45	1452.04	1533.99	1364.65	1464.64	1518	1401.09	1653.68	1661.46	1726.94	1459.21	1364.4	1687.91	1747.9
ENSCPOG00000001731	789.406	656.833	995.716	943.243	742.741	1086.26	559.821	1152.28	725.031	794.524	572.52	757.274	1009.52	840.098	806.979	727.686	964.235	818.674	854.452	686.687	1050.85	859.335	875.403
ENSCPOG00000001732	975.415	1459.98	1399.76	1222.06	1315.42	1196.88	1150.79	1416.84	942.158	1385.25	1263.97	1400.96	1337.61	1587.03	1266.67	1136.12	1498.91	1429.06	1550.36	1286.29	1323.5	1266.18	1451.91
ENSCPOG00000001734	214.138	116.217	247.838	312.839	212.065	231.225	229.976	173.43	259.213	188.531	262.751	208.762	219.93	258.978	236.702	254.626	249.956	190.928	220.259	247.556	214.714	244.107	282.45
ENSCPOG00000001735	854.736	776.163	737.406	535.891	796.014	629.63	868.593	522.25	936.419	565.593	559.613	698.944	356.936	579.541	726.555	661.768	609.165	720.318	919.96	615.779	504.407	601.336	638.415
ENSCPOG00000001736	200.527	282.241	203.332	204.149	160.842	214.59	187.829	220.462	252.517	163.394	245.234	193.412	214.522	166.598	254.066	242.993	130.772	161.999	194.625	274.924	182.905	218.307	239.889
ENSCPOG00000001737	1378.28	1187.07	1169.38	1223	1275.47	1035.52	1510.88	1150.32	843.638	1134.78	1147.81	1059.16	863.496	902.474	1652.34	1174.9	962.58	1184.14	847.806	598.363	777.06	984.365	1147.21
ENSCPOG00000001738	40.8313	18.6777	5.23602	6.61594	1.02447	0.831744	86.1263	38.2134	117.65	5.3866	4.60967	28.6536	5.40812	0	0.913906	71.0883	0	67.4997	0	8.70799	2.27211	0.992303	2.90189
ENSCPOG00000001739	2091.47	2059.74	1812.54	1511.27	2062.26	2255.69	1323.05	1509.92	1448.15	1651.89	1192.06	2025.2	1584.58	1904.43	1769.32	1720.34	1668.58	1582.38	2073.47	1642.08	1478	2010.41	1837.86
ENSCPOG00000001746	0	0	0	0	3.07341	4.15872	0	0	0	0	0	0	3.60541	0	0	0	0	0	0	0	0	0	0
ENSCPOG00000001748	211.416	207.53	178.025	147.441	211.041	156.368	197.907	184.208	253.474	166.985	272.892	193.412	133.4	127.12	173.642	205.51	177.949	234.32	264.88	199.04	122.694	155.792	168.31
ENSCPOG00000001749	1950.83	1820.04	2165.97	2205.94	2025.38	2101.82	2092.69	1808.77	1955.1	1865.56	2590.63	1818.48	2064.1	2091.56	2426.42	2026.66	2166.01	2179.27	2089.61	2385.99	2253.93	1958.81	2153.2
ENSCPOG00000001750	0	8.30121	0	0	0	0	3.66495	0	0	0	0	0	0	3.94783	0.913906	2.58503	0	0	0	4.97599	0	0.992303	0.967296
ENSCPOG00000001754	1244.9	1149.72	1101.31	1115.26	1006.03	864.182	1267.16	1043.52	1358.24	974.975	1379.21	1048.93	769.755	945.11	891.972	1234.35	1011.41	1103.14	1143.07	1154.43	897.482	1115.35	1038.88
ENSCPOG00000001758	80.7553	63.2967	77.6676	64.2691	63.5172	23.2888	86.1263	46.0521	95.6505	20.6486	122.617	72.6574	21.6325	39.4783	56.6622	50.4081	48.8325	46.2855	68.3562	54.7359	74.9795	48.6229	49.3321
ENSCPOG00000001761	187.824	266.676	95.9937	195.643	244.848	192.133	167.672	250.837	234.344	176.86	243.39	234.346	277.617	220.289	178.212	249.455	302.927	246.856	116.775	261.24	260.156	154.799	164.44
ENSCPOG00000001763	3373.58	3091.16	3434.83	3696.42	3695.27	3790.26	3572.41	3464.69	2495.52	3622.49	2715.09	3352.47	4586.08	4854.25	3923.4	3050.34	4255.88	3236.13	3902	3722.04	3878.48	4043.64	3916.58
ENSCPOG00000001764	16085.7	21638.1	29591.4	24981.8	27088	31240.3	19657.9	31648.6	22200.5	27516.6	11371.1	25139.5	13779.9	30872.8	38329.2	6878.77	38328.6	32899.3	37066.1	12657.7	12415.9	16517.9	33166.6
ENSCPOG00000001765	471.829	529.202	708.608	579.367	877.971	785.998	677.1	940.639	791.03	561.104	674.855	693.827	663.396	788.776	729.297	681.156	907.954	687.532	695.904	671.759	775.924	608.282	753.524
ENSCPOG00000001766	1182.29	940.112	1383.18	1453.62	1238.58	1224.33	1236	1170.9	1215.72	1282.91	1556.22	937.383	1310.57	1247.51	1334.3	1520	1101.63	1263.21	1336.74	1550.02	1268.97	1330.68	1359.05
ENSCPOG00000001767	1012.62	698.339	753.987	636.075	783.72	509.027	1035.35	610.435	825.464	780.16	1129.37	695.874	589.485	654.55	621.456	718.639	612.475	641.247	579.129	541.139	504.407	616.22	719.668
ENSCPOG00000001768	4329.03	3717.9	4403.49	3715.32	3945.24	4293.46	3992.96	3879.15	3820.28	3890.92	2851.54	4180.36	3477.42	4216.28	4168.33	3342.44	4144.14	4341.19	4370.05	3596.4	3338.86	3529.62	4310.27
ENSCPOG00000001769	345.705	403.646	232.13	286.376	239.726	168.844	288.615	291.99	588.251	249.579	333.74	240.486	333.501	307.931	285.139	302.449	316.997	276.749	231.651	213.968	307.87	320.514	248.595
ENSCPOG00000001770	0	0	0.87267	0.945134	1.02447	3.32698	1.83248	0	1.91301	0.897767	0.921933	0	0	1.57913	0.913906	1.29252	0	0.964281	0	0	0	1.98461	2.90189
ENSCPOG00000001771	1177.76	1654.02	1631.89	1608.62	1514.17	1384.85	1609.83	1776.44	1774.32	1607.9	1847.55	1387.65	1869.41	1643.09	1562.78	1822.45	1745.56	1609.38	1706.06	1889.63	2026.72	1631.35	1879.46
ENSCPOG00000001772	578.898	619.478	863.071	762.723	756.059	738.589	887.834	754.471	751.813	738.862	1026.11	457.435	831.047	666.394	808.807	990.067	896.366	647.997	677.865	740.179	853.176	969.48	745.785
ENSCPOG00000001773	896.475	902.756	1118.76	935.682	1005.01	1005.58	961.133	910.264	850.333	1174.28	784.565	829.932	1000.5	1078.55	1067.44	890.543	958.441	1030.82	976.924	967.831	899.754	924.827	1002.12
ENSCPOG00000001774	538.974	587.311	524.475	537.781	707.909	568.081	500.266	689.802	393.124	636.517	429.621	577.166	782.374	724.822	587.642	584.217	620.752	618.104	569.635	675.491	685.04	566.605	665.5
ENSCPOG00000001777	4890.69	4571.89	4463.71	4936.43	4305.85	3629.73	4314.56	4645.38	3992.45	4974.53	5881.01	3684.04	7711.97	3608.32	4270.68	8486.66	3860.25	3917.87	4161.18	7849.63	7411.61	7697.3	4724.27
ENSCPOG00000001778	637.876	908.982	879.651	1006.57	788.842	1084.59	834.693	983.751	886.68	1061.16	537.487	1055.07	1272.71	1114.87	1040.94	803.945	1034.59	1050.1	874.389	945.439	1012.22	849.412	916.997
ENSCPOG00000001779	2962.54	2627.33	2500.2	2572.65	2482.29	2020.31	3230.65	2397.65	2750.91	2778.59	4760.86	1887.05	2621.13	2367.91	1985.92	2987	2048.48	2111.78	2146.57	2566.37	2253.93	2677.23	2477.25
ENSCPOG00000001780	352.057	381.856	342.087	362.931	295.047	310.241	262.044	369.397	291.734	402.2	256.297	307.003	371.357	410.574	317.125	294.694	379.073	286.391	451.91	353.296	298.782	317.537	389.82
ENSCPOG00000001781	142.456	308.182	109.956	142.715	182.356	165.517	281.285	224.382	196.084	179.553	1228.94	291.653	207.311	165.809	167.245	126.667	167.189	201.535	110.129	170.428	197.673	151.822	165.408
ENSCPOG00000001782	39.0166	142.158	109.956	64.2691	78.8842	108.127	127.357	86.2252	92.781	87.9812	142.9	113.591	70.3055	78.9566	95.9601	125.374	67.8689	79.071	95.8885	104.496	146.551	67.4766	51.2667
ENSCPOG00000001783	581.62	524.014	402.301	500.921	582.924	466.608	485.606	388.993	531.817	456.066	486.781	468.691	454.282	427.945	387.496	597.142	438.665	446.462	461.404	512.527	461.237	603.32	471.073
ENSCPOG00000001784	795.758	1213.01	1073.38	1481.02	1151.5	1133.67	1035.35	1259.08	1101.89	1093.48	811.301	1293.51	1306.96	1238.83	1379.08	1308.03	1230.74	1327.81	1128.83	1302.47	1497.32	1174.89	1078.54
ENSCPOG00000001785	5339.83	3062.11	3946.21	3385.47	3986.21	3327.81	4588.52	3164.86	3189.95	3840.65	3742.13	4176.26	2608.51	3193.79	3060.67	3567.34	3299.92	4062.52	4769.74	3132.39	2182.36	3621.91	4034.59
ENSCPOG00000001787	434.627	574.859	689.409	759.887	747.863	865.014	492.936	783.866	645.641	820.559	451.747	855.515	773.361	825.886	783.217	550.612	817.738	694.282	810.78	685.443	859.992	685.682	584.247
ENSCPOG00000001788	2412.68	1967.39	1804.68	1692.73	1644.28	1694.26	1816.9	1343.35	1632.75	1333.18	1153.34	1695.68	1382.68	1735.47	1690.73	1532.92	2001.31	1871.67	2015.56	1609.73	1564.34	1750.42	1878.49
ENSCPOG00000001790	1028.04	624.666	711.226	990.5	855.433	1092.91	747.65	801.503	565.295	907.643	672.089	999.807	831.047	1174.87	1072.01	664.353	1032.93	941.138	1286.43	884.483	1091.75	816.666	839.613
ENSCPOG00000001791	1654.12	2506.97	3295.2	3935.54	3518.03	3987.38	2475.67	3157.02	2477.35	3790.37	1943.43	3051.61	4962.85	4665.55	4108.92	2460.95	3838.73	2940.09	3110.21	3207.03	3915.97	3054.31	2840.95
ENSCPOG00000001792	188.732	122.443	62.8322	88.8426	53.2725	145.555	43.0632	51.9311	148.258	43.9906	16.5948	82.8908	43.2649	108.171	75.8542	55.5782	90.216	112.821	77.8501	33.588	47.7142	37.7075	64.8088
ENSCPOG00000001794	515.382	480.432	140.5	318.51	279.68	446.647	566.235	372.336	328.081	260.352	532.877	598.656	104.557	438.209	282.397	168.027	216.849	678.854	239.247	213.968	223.802	281.814	249.562
ENSCPOG00000001795	0	0	0.87267	0	0	0	0	0.979832	0	0	3.68773	2.04669	0	0	0	0	0	0	0	0	0	2.97691	0
ENSCPOG00000001796	139.734	93.3886	47.1242	44.4213	81.9576	103.968	87.0426	28.4151	189.388	221.748	98.6468	78.7974	59.4893	110.539	96.874	67.2108	58.7645	43.3926	195.575	126.888	38.6258	61.5228	89.9585
ENSCPOG00000001797	1365.58	2142.75	1091.71	1395.96	1047.01	1363.23	1009.69	1154.24	2137.79	960.611	1230.78	1851.23	881.523	1293.31	1516.17	1062.45	1457.53	1576.6	1148.76	1219.12	1415.52	1237.4	1270.06
ENSCPOG00000001798	1298.44	1059.44	1209.52	807.144	1100.28	838.398	1067.42	812.281	1090.42	950.735	1709.26	1248.48	782.374	900.895	1001.64	1002.99	1103.28	1124.35	840.211	842.187	792.965	909.942	993.413
ENSCPOG00000001799	2031.59	2884.67	3507.26	3331.6	3356.17	3615.59	2841.25	3751.78	2599.78	3255.3	3364.13	3634.92	3664.9	4003.89	3511.23	2813.81	3346.27	3671.02	3387.43	3537.93	3973.91	3006.68	3362.32
ENSCPOG00000001800	28.1283	48.7696	31.4161	106.8	35.8565	98.9776	79.7127	33.3143	44.9557	41.2973	87.5836	49.1205	16.2243	65.534	38.3841	43.9455	33.9345	48.214	30.3805	79.6159	96.5645	79.3843	75.4491
ENSCPOG00000001801	41.7387	12.4518	20.9441	9.45134	5.12235	13.3079	12.8273	1.95966	3.82602	11.671	58.0818	14.3268	9.01353	9.47479	6.39734	7.75509	12.415	27.9641	0	3.732	2.27211	9.92303	5.80378
ENSCPOG00000001803	0	1.03765	13.0901	2.8354	0	0	0	20.5765	0	0	0	0	3.60541	0	0	1.29252	1.65534	0	1.89878	0	0	0	0
ENSCPOG00000001806	686.874	1344.8	1082.98	1395.96	1470.12	1644.36	637.701	1323.75	1024.42	1367.3	535.643	1263.83	1487.23	1652.56	1643.2	1037.89	1373.1	1129.17	1204.78	964.099	1404.16	1167.94	1069.83
ENSCPOG00000001807	1065.24	1656.09	1206.9	1423.37	1280.59	1225.99	1437.58	1239.49	985.2	1297.27	1736.92	1274.06	1451.18	1185.93	1232.86	1518.71	1276.27	1360.6	1229.46	1205.43	1228.07	1187.79	1289.41
ENSCPOG00000001808	112.513	115.179	82.031	72.7753	100.398	99.8093	82.4614	83.2857	67.9119	76.3102	65.4572	83.9142	45.0676	96.327	110.583	63.3333	114.218	80.9996	90.1922	77.1279	106.789	98.238	120.912
ENSCPOG00000001809	994.47	1024.16	1321.22	1429.04	1358.45	1675.13	1073.83	1199.31	970.853	1562.11	584.506	1555.48	1564.75	1527.81	1534.45	1022.38	1535.33	1485.96	1040.53	993.955	1401.89	1263.2	1082.4
ENSCPOG00000001811	5.44418	0	8.7267	6.61594	10.2447	20.7936	5.49743	0.979832	24.8691	3.59107	56.2379	27.6303	0	5.52696	31.0728	14.2177	0	14.4642	0	3.732	18.1768	8.93073	0
ENSCPOG00000001812	941.843	898.606	828.164	773.119	849.286	800.97	716.498	911.244	888.593	656.268	815.911	847.328	744.517	810.095	700.052	944.829	792.08	759.853	817.426	900.655	921.339	815.673	836.711
ENSCPOG00000001813	2034.31	2591.01	2937.41	2704.03	2766.07	3074.13	2284.18	2831.71	2414.22	2986.87	2903.17	2713.91	2850.08	3283.8	2744.46	2024.08	3020.17	2776.16	2634.56	2568.86	2502.72	2355.73	2515.94
ENSCPOG00000001814	1821.99	1661.28	1785.48	1774.02	1480.36	1927.15	1287.31	1736.26	1755.19	1569.3	1431.76	2166.42	1467.4	1951.81	2019.73	1703.54	1941.71	1506.21	1258.89	1454.23	1809.73	1470.59	1502.21
ENSCPOG00000001815	894.66	751.259	953.828	1058.55	833.919	761.046	984.956	740.753	883.811	942.656	1268.58	790.021	1112.27	845.625	825.257	1189.11	893.055	832.174	975.974	1076.06	940.652	1207.63	884.109
ENSCPOG00000001816	26.3135	9.33886	24.4348	19.8478	30.7341	31.6063	10.9949	5.87899	19.1301	20.6486	12.9071	30.7003	16.2243	26.8452	24.6755	18.0952	23.1747	8.67853	11.3927	12.44	12.4966	15.8769	10.6403
ENSCPOG00000001822	2576	2371.03	3351.05	2500.82	2482.29	2713.98	2600.28	3142.32	3394.64	2377.29	2259.66	3012.72	2291.24	2975.87	3198.67	2736.26	3158.39	2791.59	3564.96	2986.84	2962.83	2306.11	3122.43
ENSCPOG00000001823	0	11.4142	0	0	0	0	0	0.979832	0	0	8.2974	0	0	0.789566	1.82781	1.29252	1.65534	0	0	1.244	0	2.97691	7.73837
ENSCPOG00000001824	4984.15	3215.68	4256.88	3013.09	3631.75	3333.63	3954.48	3683.19	3687.33	3159.24	5020.85	3566.35	2215.52	2867.7	3089	3218.36	3193.98	3757.8	3901.05	3056.5	2259.61	3738.01	3231.74
ENSCPOG00000001826	1368.3	924.547	897.105	811.87	982.467	876.658	1002.36	838.736	1243.46	938.167	1138.59	1160.47	802.204	828.255	981.535	1236.94	974.995	1109.89	922.808	929.267	989.502	1188.78	973.1
ENSCPOG00000001827	1464.48	1370.74	1497.5	989.555	1126.92	1119.53	1169.12	1412.92	1511.28	1218.27	1502.75	1341.6	1004.11	964.06	1094.86	1454.08	1282.06	1363.49	1528.52	1362.18	1262.15	1260.23	1234.27
ENSCPOG00000001830	38.1093	160.836	110.829	139.88	130.108	104.8	119.111	187.148	156.867	104.141	42.4089	153.502	120.781	117.645	120.636	113.741	169.672	96.4281	125.32	130.62	161.32	110.146	82.2202
ENSCPOG00000001833	39.924	18.6777	33.1615	49.147	64.5416	51.5681	25.6547	32.3345	18.1736	41.2973	23.0483	24.5602	39.6595	24.4765	22.8477	29.7279	62.9029	14.4642	24.6842	27.368	48.8503	44.6537	41.5937
ENSCPOG00000001834	1726.71	1907.2	1238.32	1166.29	1596.13	1250.94	1274.49	1249.29	1822.14	1144.65	1514.74	1596.42	1252.88	1135.4	1233.77	1959.45	1431.87	1339.39	1576.94	1362.18	1381.44	1737.52	1315.52
ENSCPOG00000001837	965.434	1352.06	1385.8	1498.04	1350.25	1201.04	1712.45	1601.05	1614.58	1433.73	2581.41	1195.27	1806.31	1319.36	1487.84	1898.71	1295.3	1295.03	1287.37	1674.42	1648.41	1870.49	1323.26
ENSCPOG00000001839	239.544	237.622	522.729	388.45	193.625	87.3331	270.29	424.267	305.125	290.877	256.297	415.477	511.968	299.245	317.125	224.898	343.483	512.997	192.726	296.072	302.19	559.659	364.671
ENSCPOG00000001842	85.2921	31.1295	47.1242	51.9824	87.08	98.1458	70.5503	59.7698	64.0859	70.0258	85.7398	83.9142	63.0947	75.7983	68.543	81.4285	62.0752	70.3925	70.2549	42.296	82.9319	42.669	35.79
ENSCPOG00000001844	149.715	62.2591	30.5435	28.354	34.832	54.0634	56.8067	71.5277	87.9985	29.6263	17.5167	112.568	59.4893	71.0609	27.4172	21.9728	43.8665	42.4284	43.672	48.5159	61.3469	29.7691	25.1497
ENSCPOG00000001850	0.907363	1.03765	0.87267	0	0	0	0.916238	0.979832	0	0	5.5316	1.02334	0	2.3687	1.82781	0	1.65534	6.74997	2.84817	0	0	0	0.967296
ENSCPOG00000001851	157.881	202.342	140.5	243.844	265.338	214.59	270.29	179.309	299.386	203.793	252.61	380.684	277.617	213.183	276	298.571	315.342	199.606	207.917	251.288	232.891	253.037	219.576
ENSCPOG00000001852	144.271	89.238	6.10869	0	22.5384	1.66349	27.4871	1.95966	39.2167	31.4219	134.602	11.2568	0	1.57913	6.39734	0	0.82767	104.142	0.949391	2.488	3.40816	0	4.83648
ENSCPOG00000001853	0	12.4518	9.59937	8.5062	17.416	10.8127	93.4562	0	0	21.5464	17.5167	12.2801	27.0406	11.8435	23.7616	3.87755	12.415	35.6784	39.8744	7.46399	9.08842	30.7614	10.6403
ENSCPOG00000001854	0	0	0	0	0	0	0	0	14.3476	0	51.6283	0	0	0	0	0	0	3.85712	6.64574	0	4.54421	0	0
ENSCPOG00000001856	342.076	335.161	215.549	249.515	217.188	300.26	242.803	298.849	236.257	216.362	245.234	243.556	297.446	248.713	258.635	426.53	220.16	241.07	231.651	332.148	351.04	380.052	324.044
ENSCPOG00000001857	2050.64	3276.9	2439.99	2435.61	2362.43	2988.46	1585.09	2157.59	2158.83	2963.53	1296.24	3165.2	3068.2	3137.74	3072.55	1832.79	2729.65	2384.67	2328.86	1992.89	2627.69	2751.66	2656.19
ENSCPOG00000001858	110.698	341.387	304.562	273.144	246.897	127.257	164.923	229.281	189.388	173.269	111.554	209.785	124.387	266.873	77.682	96.9387	165.534	255.534	302.856	172.916	170.408	175.638	291.156
ENSCPOG00000001859	117.957	443.077	289.726	178.63	240.751	326.044	240.971	310.607	321.386	240.602	298.706	360.217	270.406	240.028	217.51	285.646	338.517	263.249	258.234	366.98	334	386.998	259.235
ENSCPOG00000001860	31.7577	20.753	0	17.0124	0	10.8127	0	16.6571	12.4346	0	0	6.14006	9.01353	0	0	3.87755	4.13835	0	15.1903	0	9.08842	8.93073	1.93459
ENSCPOG00000001861	3378.11	4118.44	6001.35	5714.28	5354.91	6863.55	4165.22	5511.55	4598.88	5567.95	3258.11	4193.66	6121.99	6803.69	5948.61	4026.19	7493.72	4746.19	6465.35	5100.39	5157.68	4568.56	4723.31
ENSCPOG00000001863	535.344	765.787	649.266	769.339	889.24	917.414	569.9	819.14	751.813	578.162	254.454	769.554	903.155	897.736	846.277	721.224	816.082	836.032	722.487	625.731	886.121	532.867	683.878
ENSCPOG00000001867	0	0	0	0	36.8809	18.2984	0	0	0	0	0	0	0	0.789566	14.6225	2.58503	1.65534	10.6071	0	0	0	0	21.2805
ENSCPOG00000001868	284.912	278.09	308.925	277.869	312.463	256.177	300.526	342.941	377.82	316.912	370.617	265.046	173.06	300.035	278.741	245.578	289.684	331.713	378.807	236.36	170.408	217.314	340.488
ENSCPOG00000001869	740.408	976.43	997.462	947.969	959.929	837.566	906.159	709.398	749.9	1042.31	1204.04	1003.9	1000.5	811.674	905.681	1015.92	789.597	890.031	860.148	924.291	878.169	1144.13	917.964
ENSCPOG00000001871	841.126	983.693	975.645	1189.92	1131.02	1147.81	870.426	923.982	894.332	956.122	803.926	935.336	1193.39	930.898	1037.28	1116.73	1195.98	1050.1	987.367	1052.42	1138.33	1189.77	883.141
ENSCPOG00000001874	0	0	0	1.89027	0	5.82221	3.66495	4.89916	0.956505	1.79553	0	2.04669	5.40812	1.57913	2.74172	2.58503	0	2.89284	0	2.488	1.13605	3.96921	0.967296
ENSCPOG00000001875	1862.82	2869.11	2524.63	2270.21	2106.31	2699.84	1593.34	2347.68	2382.65	2122.32	1570.97	2509.24	2134.4	2278.69	2532.43	2570.81	2402.72	2249.67	2341.2	2310.11	2306.19	2631.59	2265.41
ENSCPOG00000001877	621.544	806.255	732.17	968.762	1216.05	1257.6	667.021	923.002	886.68	1194.93	719.108	1164.56	1178.97	1298.84	1050.99	819.455	1289.51	794.567	882.934	993.955	1254.2	904.981	775.771
ENSCPOG00000001881	6289.84	4788.76	6155.81	5026.22	6079.21	5959.45	5571.64	4865.85	5240.69	5119.97	3206.48	5944.6	2905.96	4995.58	5211.09	3814.21	5595.05	4929.4	5831.16	3576.5	3049.17	4598.33	6008.84
ENSCPOG00000001882	426.461	541.654	644.03	631.349	593.168	626.303	529.585	585.94	503.122	781.955	715.42	553.629	879.72	667.183	582.158	654.013	563.643	620.033	548.748	614.535	832.727	751.174	524.274
ENSCPOG00000001883	1104.26	1171.51	930.266	829.827	804.209	881.649	831.028	962.195	845.551	713.725	531.033	922.032	836.455	788.776	764.939	930.611	852.5	1049.14	764.26	950.415	865.672	793.843	729.341
ENSCPOG00000001885	234.1	360.065	290.599	391.285	314.512	402.564	241.887	317.466	386.428	368.085	195.45	388.871	302.855	344.251	329.006	343.809	437.01	207.32	378.807	394.348	404.435	384.021	491.386
ENSCPOG00000001886	5.44418	0	10.472	0.945134	0	0	0	0	0	0	16.5948	0	1.80271	0	0	0	0	1.92856	0	0	0	3.96921	0
ENSCPOG00000001888	1556.13	1671.66	1703.45	1733.38	1741.6	2171.68	1606.16	1727.44	1542.84	1830.55	1121.99	2015.99	1564.75	1986.55	1973.12	1390.75	1656.99	1683.63	1820.93	1406.96	1420.07	1712.72	1805.94
ENSCPOG00000001890	0	20.753	0.87267	4.72567	4.09788	7.4857	7.3299	5.87899	0	0	23.9703	7.1634	0	9.47479	2.74172	0	8.2767	1.92856	15.1903	8.70799	13.6326	1.98461	3.86918
ENSCPOG00000001891	843.848	689	713.844	644.581	811.381	868.341	679.848	685.882	707.814	698.463	592.803	1182.99	753.531	636.39	640.648	806.53	630.684	690.425	762.361	710.323	688.448	819.643	742.883
ENSCPOG00000001892	0.907363	10.3765	0	0	3.07341	0	0.916238	4.89916	4.78253	0	0	0	0	0	2.74172	0	0	0	0	3.732	0	3.96921	0
ENSCPOG00000001893	438.256	213.756	299.326	459.335	318.61	380.939	310.605	497.755	307.038	372.573	389.056	362.264	362.344	385.308	458.781	368.367	416.318	498.533	452.86	366.98	380.578	391.96	410.133
ENSCPOG00000001894	244.988	267.714	201.587	241.009	226.408	164.685	256.547	292.97	204.692	240.602	314.379	217.972	221.733	232.922	248.582	268.843	233.403	154.285	226.904	263.728	263.564	254.03	229.249
ENSCPOG00000001898	5797.14	5189.29	4347.64	3780.53	4761.74	3794.42	4364.04	3697.89	4906.87	3778.7	2930.83	3598.08	3347.62	3561.73	3757.07	4859.86	4164.83	4403.87	5374.5	3853.91	3321.82	3808.46	4227.08
ENSCPOG00000001899	11683.2	9736.28	10898.8	11328.4	10516.2	8855.58	12032	10664.5	12193.5	11235.6	17795.2	10044.1	10726.1	9289.24	10016.4	13218.6	8942.97	11792.2	11108.8	11453.5	10215.4	11359.9	10688.6
ENSCPOG00000001900	312.133	458.642	699.009	632.294	676.151	790.157	584.56	781.906	518.426	813.377	809.457	905.659	892.339	692.449	794.184	778.094	671.24	770.46	535.457	808.599	836.135	797.812	633.579
ENSCPOG00000001902	1267.59	677.586	697.263	617.172	798.063	583.053	912.573	800.523	868.507	737.965	1365.38	593.539	760.742	624.547	658.012	834.965	590.128	688.497	600.965	650.611	621.421	680.72	798.019
ENSCPOG00000001904	16.3325	24.9036	54.9782	108.69	61.4682	44.0824	46.7281	87.205	67.9119	81.6968	98.6468	66.5173	79.319	57.6383	72.1986	72.3809	82.767	53.9997	59.8116	64.6879	104.517	91.2919	88.9912
ENSCPOG00000001913	31.7577	0	5.23602	6.61594	0	6.65395	0.916238	16.6571	42.0862	0.897767	78.3643	0	0	0.789566	0	0	0.82767	23.1427	0	2.488	10.2245	0	6.77107
ENSCPOG00000001917	3320.95	4000.15	2925.19	2884.55	2738.41	3561.53	2314.42	2498.57	2777.69	2816.3	2068.82	4720.68	2893.34	3457.51	3341.24	2725.91	2764.42	3003.73	3273.5	3244.35	3482	3416.5	2958.96
ENSCPOG00000001918	330.28	370.441	382.229	308.114	433.351	381.771	537.832	451.703	494.513	410.28	537.487	334.633	257.787	314.247	350.94	394.217	313.687	390.534	373.111	324.684	291.966	300.668	377.245
ENSCPOG00000001921	285.819	333.086	396.192	440.432	168.013	480.748	357.333	345.881	445.731	421.951	269.204	346.913	344.317	330.828	389.324	412.312	242.507	557.354	289.564	408.032	252.204	288.76	346.292
ENSCPOG00000001924	562.565	814.556	1268.86	1171.02	900.51	954.011	1018.86	1087.61	933.549	1132.08	1157.03	757.274	1074.41	1178.82	1146.95	986.189	1104.94	944.031	980.721	1097.21	1009.95	955.588	784.477
ENSCPOG00000001925	1463.58	1376.96	1269.73	1229.62	1291.86	1238.47	1221.34	1228.71	1440.5	1236.23	1818.05	1165.59	1009.52	918.265	1139.64	1429.52	1176.95	1233.32	1304.46	1261.41	1049.71	1320.76	1328.1
ENSCPOG00000001929	910.085	1062.55	919.794	1154.95	1096.18	960.665	1063.75	1043.52	1107.63	1125.8	1616.15	905.659	1087.03	990.905	1072.93	1183.94	821.048	1094.46	836.414	1227.83	911.114	1133.21	1154.95
ENSCPOG00000001930	166.047	22.8283	17.4534	8.5062	140.352	24.1206	26.5709	8.81849	62.1728	32.3196	313.457	12.2801	19.8298	2.3687	16.4503	27.1428	7.44903	108.964	220.259	7.46399	3.40816	13.8922	23.2151
ENSCPOG00000001931	163.325	181.589	141.373	107.745	220.261	101.473	142.017	119.54	119.563	131.074	186.23	149.408	84.7272	33.9513	97.7879	274.013	155.602	146.571	61.7104	156.744	207.898	72.4381	170.244
ENSCPOG00000001933	742.223	802.104	1055.06	953.64	926.121	1030.53	807.205	907.324	692.51	982.157	891.509	804.348	962.645	982.22	892.886	849.183	1178.6	825.424	920.909	1010.13	1165.59	1003.22	761.262
ENSCPOG00000001937	154.252	50.8449	49.7422	65.2142	94.2513	67.3713	50.3931	153.834	95.6505	79.0035	1258.44	138.151	77.5163	20.5287	151.708	36.1904	81.1116	233.356	153.801	38.564	43.17	48.6229	26.117
ENSCPOG00000001938	741.316	575.896	547.164	513.208	521.455	408.386	518.591	439.945	539.469	595.22	884.134	462.551	468.703	371.886	478.887	688.911	364.175	464.783	430.074	577.215	522.584	538.821	547.49
ENSCPOG00000001939	51.7197	38.3931	24.4348	78.4461	68.6395	46.5777	88.8751	95.0437	92.781	56.5593	84.8178	77.7741	7.21082	56.0592	68.543	10.3401	34.7621	65.5711	35.1275	14.928	9.08842	14.8846	72.5472
ENSCPOG00000001944	1188.65	987.844	1093.46	897.877	987.59	1103.72	1174.62	945.538	1188.94	954.327	934.84	1374.35	560.641	1018.54	1083.89	608.775	1287.03	900.638	1172.5	617.023	631.645	917.881	950.852
ENSCPOG00000001946	564.38	476.282	527.093	623.788	531.7	509.027	481.941	500.694	520.339	539.558	517.204	501.438	845.469	534.536	517.271	734.149	486.67	489.855	446.214	690.419	707.761	753.158	531.045
ENSCPOG00000001949	0	0	3.49068	6.61594	7.17129	4.15872	0	2.9395	0	4.48884	2.7658	7.1634	1.80271	0	3.65562	1.29252	1.65534	0.964281	4.74696	1.244	0	0	0.967296
ENSCPOG00000001950	1306.6	933.886	882.269	995.226	902.558	958.169	888.751	751.531	941.201	972.282	786.409	990.597	1029.34	942.742	923.045	1076.67	1012.24	1016.35	871.541	1156.92	934.972	1130.23	855.09
ENSCPOG00000001951	627.895	547.88	310.671	332.687	539.896	459.123	380.239	338.042	521.295	276.512	340.193	404.221	360.541	362.411	376.529	391.632	413.007	391.498	489.886	373.2	329.455	507.067	330.815
ENSCPOG00000001954	280.375	230.359	183.261	223.997	215.139	236.215	297.777	246.918	246.778	260.352	200.981	238.439	272.209	249.503	223.907	219.728	217.677	235.285	230.702	255.02	228.347	182.584	214.74
ENSCPOG00000001955	74.4038	122.443	73.3043	119.087	101.423	144.723	107.2	99.9429	91.8245	88.879	68.223	86.9842	52.2785	97.1166	118.808	90.4761	113.391	69.4282	141.459	121.912	90.8842	143.884	59.9724
ENSCPOG00000001956	579.805	835.309	444.189	576.532	539.896	791.82	514.926	654.528	716.422	445.293	304.238	656.987	488.533	716.926	582.158	620.407	572.747	650.89	731.031	450.328	536.217	649.959	584.247
ENSCPOG00000001958	848.385	687.963	609.124	891.261	848.262	917.414	787.964	721.156	637.033	719.112	503.375	1046.88	621.933	933.267	746.661	551.904	996.514	851.46	781.349	503.819	521.448	545.767	663.565
ENSCPOG00000001959	38.1093	28.0166	44.5062	1.89027	24.5873	148.05	63.2204	87.205	44.9557	88.879	129.071	158.618	137.006	40.2679	31.9867	81.4285	71.1796	90.6424	103.484	38.564	72.7074	86.3304	29.0189
ENSCPOG00000001960	2359.14	1989.18	1948.67	1979.11	1981.33	2014.48	2456.43	2320.24	2289.87	2049.6	2406.25	2086.6	2702.26	1995.23	1912.81	3129.18	1628.85	2102.13	2170.31	3110	2356.17	2576.02	2219.94
ENSCPOG00000001962	103.439	146.309	152.717	126.648	112.692	121.435	108.116	109.741	185.562	90.6745	86.6617	130.988	91.938	78.167	165.417	166.734	139.876	90.6424	46.5202	100.764	82.9319	129.992	181.852
ENSCPOG00000001963	39.924	12.4518	11.3447	17.0124	7.17129	10.8127	24.7384	28.4151	18.1736	9.87544	35.0335	14.3268	9.01353	5.52696	0.913906	18.0952	15.7257	26.0356	15.1903	7.46399	15.9047	8.93073	8.70566
ENSCPOG00000001964	111.606	262.526	315.907	346.864	504.039	316.063	147.514	260.635	173.127	423.746	177.011	130.988	396.595	536.115	323.523	99.5237	384.866	233.356	243.994	238.848	510.088	106.176	197.328
ENSCPOG00000001965	3498.79	2102.28	2316.07	2583.05	1892.2	1377.37	2822.93	2014.53	2373.09	2615.2	4618.88	1674.19	1352.03	1518.34	1964.9	1580.75	1517.95	2197.6	1606.37	1138.26	1002	1201.68	2929.94
ENSCPOG00000001967	92.551	158.761	166.68	121.922	229.481	173.835	151.179	195.966	224.779	125.687	129.071	151.455	147.822	172.125	180.039	164.149	237.541	187.07	177.536	192.82	171.544	166.707	114.141
ENSCPOG00000001972	0	0	0	1.89027	0	0	0	2.9395	0.956505	0.897767	1.84387	0	0	0	1.82781	0	0.82767	0	1.89878	0	0	0	1.93459
ENSCPOG00000001973	450.052	514.675	713.844	606.776	616.731	474.926	495.685	499.714	617.902	506.341	911.792	595.586	580.471	469.792	615.973	743.196	667.929	562.176	548.748	513.771	777.06	582.482	508.798
ENSCPOG00000001974	174.214	222.057	187.624	209.82	153.671	112.285	109.032	165.592	192.258	133.767	128.149	166.805	135.203	110.539	150.794	135.714	103.459	97.3924	131.965	145.548	185.177	124.038	143.16
ENSCPOG00000001975	0	0	0	0	19.4649	0	0	0	3.82602	0	12.9071	0	0	0	0	3.87755	0	12.5357	18.0384	0	0	0	0
ENSCPOG00000001976	0	0	0.87267	0	0	31.6063	16.4923	0	0	0	0	0	28.8433	0	0	16.8027	54.6262	1.92856	0	0	12.4966	18.8538	0
ENSCPOG00000001977	0	0	2.61801	0	0	1.66349	0	1.95966	2.86952	3.59107	0	0	0	0	0	0	0	4.8214	1.89878	1.244	0	1.98461	0
ENSCPOG00000001979	9.981	6.22591	1.74534	0	0	0	0	1.95966	22.9561	0.897767	18.4387	4.09337	0	0	0.913906	0	0	27.9641	0	0	0	0	0
ENSCPOG00000001980	353.872	381.856	211.186	176.74	349.344	430.843	319.767	101.903	357.733	358.209	215.732	325.423	155.033	420.049	568.45	130.544	380.728	276.749	603.813	315.976	138.598	240.137	249.562
ENSCPOG00000001982	0	16.6024	0	7.56107	0	0	0	1.95966	0	8.0799	37.7993	14.3268	0	0	7.31125	0	3.31068	1.92856	0	0	1.13605	0	0
ENSCPOG00000001983	68.9596	80.9368	89.0123	80.3364	114.741	96.4823	40.3145	97.9832	34.4342	74.5147	91.2714	173.968	284.827	254.24	201.059	23.2653	210.228	112.821	68.3562	73.3959	115.877	173.653	125.748
ENSCPOG00000001987	912.807	1040.76	908.449	792.967	992.712	793.484	1035.35	875.97	959.375	723.6	1220.64	767.508	778.769	768.248	846.277	864.693	850.844	971.995	969.328	881.995	721.394	866.281	926.67
ENSCPOG00000001990	45.3682	78.8615	27.9254	78.4461	79.9087	94.8188	44.8956	92.1042	64.0859	65.537	83.8959	118.708	41.4622	86.8523	73.1125	37.4829	66.2136	60.7497	50.3177	53.4919	38.6258	44.6537	62.8742
ENSCPOG00000001991	457.311	244.886	443.316	414.914	403.641	388.425	435.213	366.457	312.777	491.079	192.684	381.707	369.555	345.83	339.059	311.496	347.621	269.999	347.477	313.488	153.367	278.837	305.666
ENSCPOG00000001992	616.1	494.96	692.027	723.972	646.441	612.995	728.409	646.689	668.597	633.824	924.699	608.889	858.088	660.867	689.085	860.815	657.997	628.711	702.549	888.215	727.074	766.058	740.949
ENSCPOG00000001993	926.418	1600.06	1224.36	1731.48	1597.15	1549.54	1233.26	1352.17	1219.54	1344.86	1240.92	1328.3	1725.19	1575.18	1607.56	1651.83	1599.89	1137.85	1389.91	1496.53	1787.01	1371.36	1417.09
ENSCPOG00000001994	136.104	117.255	232.13	243.844	178.258	179.657	222.646	218.503	186.519	224.442	175.167	199.552	144.216	160.282	228.477	217.143	165.534	143.678	83.5464	114.448	196.537	227.237	147.029
ENSCPOG00000001996	19.0546	58.1085	19.1987	95.4585	32.7831	54.8951	29.3196	109.741	23.9126	41.2973	24.8922	36.8404	16.2243	135.016	69.4569	29.7279	33.9345	83.8924	80.6983	32.344	64.755	21.8307	11.6076
ENSCPOG00000001997	2052.46	1820.04	1932.09	1529.23	1704.72	1690.94	1990.98	1437.41	1979.01	1622.27	1636.43	1967.89	1052.78	1484.38	1551.81	1516.12	1644.58	1866.85	1709.85	1416.91	1195.13	1558.91	1834.96
ENSCPOG00000001999	0	0	0	0	0	0	0	0	0	0	73.7546	0	0	0	0.913906	0	4.13835	10.6071	0	0	0	2.97691	0
ENSCPOG00000002001	754.019	727.393	607.378	863.852	682.297	776.849	520.423	813.261	729.814	689.485	737.546	728.621	960.842	608.755	738.436	1092.18	826.014	736.711	519.317	740.179	1147.41	683.697	579.41
ENSCPOG00000002005	1723.99	1562.7	1496.63	1193.7	1505.97	1433.93	1578.68	1379.6	1478.76	1388.85	1358.93	1202.43	1247.47	1416.48	1350.75	1300.27	1431.04	1616.13	1439.28	1365.91	1249.66	1261.22	1546.71
ENSCPOG00000002009	1467.21	1623.92	1628.4	1485.75	1508.02	1448.07	1534.7	1562.83	1912.05	1459.77	1970.17	1559.58	1685.53	1656.51	1560.04	1548.43	1500.56	1716.42	1786.75	1737.87	1393.94	1803.02	1508.01
ENSCPOG00000002012	6670.03	6152.23	8218.81	8392.79	8664.97	8261.71	7371.13	9821.84	7227.35	8762.21	6962.44	7762.06	10255.6	8611.8	8579.75	9670.6	8166.62	7607.21	9277.45	10667.3	10223.3	8541.75	8430.95
ENSCPOG00000002014	0	0	0	0	0	0	0	0	0.956505	0	0	3.07003	1.80271	5.52696	0	0	0	0	0	0	0	0.992303	7.73837
ENSCPOG00000002015	20685.2	15588.6	19101.9	19907.4	24197	22423.8	18773.7	21220.2	16020.5	24954.3	19132.9	19523.3	31156.2	23739.1	21366.2	27190.6	19622.4	21226.7	25578.5	27506.1	22170.1	29413.9	20063.7
ENSCPOG00000002016	1025.32	1153.87	1610.95	936.627	822.65	750.233	906.159	1161.1	901.984	798.115	1221.56	373.52	1388.08	514.007	774.078	807.822	849.189	1159.07	558.242	728.983	957.693	1176.87	800.921
ENSCPOG00000002017	1154.17	1133.12	1398.89	1641.7	1189.41	1662.66	1391.77	1385.48	1168.85	1282.91	1152.42	1237.22	1007.71	1448.85	1709.92	1231.77	1376.41	1565.99	1566.5	1253.95	1298.51	991.311	1374.53
ENSCPOG00000002019	9408.45	7207.52	8284.26	8906.94	10888.1	9071	10687.9	12439	8688.89	7733.37	7210.44	11389.8	12974.1	8820.24	7521.45	10503	8231.17	9820.24	9779.68	14006.2	9956.37	13388.2	10292
ENSCPOG00000002020	76.2185	15.5648	204.205	69.9399	106.545	89.8284	136.519	197.926	10.5216	125.687	41.487	98.241	189.284	210.814	144.397	27.1428	209.4	87.7496	53.1659	181.624	145.415	197.468	103.501
ENSCPOG00000002022	49.905	65.372	61.9596	62.3788	61.4682	34.9333	68.7178	74.4672	43.9992	45.7861	72.8327	65.494	46.8703	48.1635	52.0926	38.7755	46.3495	66.5354	46.5202	46.028	34.0816	56.5613	47.3975
ENSCPOG00000002023	4899.76	4017.79	5071.96	4350.45	5361.05	4384.12	4332.89	4079.04	3465.42	5012.23	4315.57	4240.74	4257.99	4813.98	4524.75	4251.08	4008.4	4242.84	5159.94	4200.98	3563.8	4684.66	4458.27
ENSCPOG00000002024	462.755	404.684	359.54	278.814	371.883	249.523	467.281	398.792	395.993	312.423	498.766	332.587	284.827	292.139	265.033	395.51	292.995	354.855	389.25	396.836	337.408	338.375	304.698
ENSCPOG00000002025	305.781	166.024	53.2329	38.7505	54.2969	8.31744	36.6495	43.1126	106.172	37.7062	613.085	115.638	50.4758	24.4765	33.8145	58.1632	124.978	327.855	56.0141	54.7359	30.6734	63.5074	75.4491
ENSCPOG00000002028	23.5914	8.30121	20.9441	27.4089	20.4894	48.2412	46.7281	33.3143	50.6948	5.3866	36.8773	22.5136	23.4352	24.4765	18.2781	41.3605	14.8981	13.4999	19.9372	38.564	42.034	59.5382	9.67296
ENSCPOG00000002029	143.363	207.53	314.161	321.345	409.788	206.273	251.965	222.422	224.779	421.053	85.7398	500.415	416.425	457.159	217.51	171.905	462.667	399.212	336.084	419.228	393.074	443.56	457.531
ENSCPOG00000002031	1322.94	2439.52	2442.6	2814.61	2598.06	2891.14	1846.22	2715.11	1838.4	2687.91	1483.39	2299.45	3246.67	2997.98	3019.55	1616.94	3135.21	2572.7	2362.09	2077.48	2792.42	2542.28	2218.01
ENSCPOG00000002033	4372.58	3918.17	4801.43	4985.58	3929.87	4029.8	5183.16	4498.41	4827.48	4792.28	6578.91	3691.2	5029.55	4299.98	4615.23	5303.19	4572.05	4563.94	4357.71	4906.33	4728.25	5211.58	4554.03
ENSCPOG00000002034	1860.09	1400.83	1395.4	1479.13	1482.41	1760.8	1554.86	1541.28	1292.24	1492.09	1375.52	1944.35	1871.21	1393.58	1709	1984.01	1656.99	1897.7	1686.12	1956.81	1849.49	1934	1495.44
ENSCPOG00000002035	1884.59	882.003	971.282	974.433	1098.23	830.081	1629.07	924.961	1261.63	890.585	1952.65	951.709	533.601	602.439	831.655	736.734	956.786	1158.1	975.974	788.695	515.768	649.959	1189.77
ENSCPOG00000002037	0	6.22591	47.9969	47.2567	13.3181	33.2698	22.9059	24.4958	30.6082	21.5464	0	0	16.2243	18.9496	27.4172	21.9728	29.7961	26.9999	20.8866	17.416	30.6734	16.8692	23.2151
ENSCPOG00000002038	4201.09	4205.6	4110.28	3823.07	4072.27	4395.77	4106.58	4014.37	3775.33	3893.62	2795.3	4707.38	2622.94	4471.31	4210.37	3170.54	4472.73	4138.69	4486.82	3577.74	3102.56	3308.34	4147.77
ENSCPOG00000002043	195.083	69.5226	30.5435	51.9824	50.1991	0	129.19	21.5563	130.085	79.9013	469.264	118.708	5.40812	9.47479	70.3708	24.5578	34.7621	258.427	27.5323	19.904	20.449	12.8999	14.5094
ENSCPOG00000002045	548.047	569.67	557.636	430.981	419.008	543.129	617.544	512.452	750.857	469.532	540.253	630.38	555.233	478.477	456.039	507.959	222.643	464.783	393.997	529.943	441.925	377.075	419.806
ENSCPOG00000002047	25.4062	71.5979	56.7236	33.0797	37.9054	25.7841	39.3982	31.3546	46.8688	32.3196	56.2379	57.3072	28.8433	29.2139	22.8477	60.7482	30.6238	16.3928	45.5708	42.296	36.3537	40.6844	27.0843
ENSCPOG00000002049	34.4798	5.18826	0	24.5735	27.6607	4.99046	4.58119	24.4958	29.6517	38.604	339.271	12.2801	1.80271	1.57913	13.7086	5.17006	1.65534	94.4995	33.2287	0	4.54421	0	2.90189
ENSCPOG00000002051	2227.58	4081.08	2406.82	2281.55	2410.58	3336.13	2128.42	2664.16	2773.87	1960.72	1353.4	3304.38	1719.78	2655.31	2688.71	2157.21	2284.37	2489.77	2270.94	2045.13	2489.09	2497.63	2571.07
ENSCPOG00000002052	965.434	1151.79	874.415	930.012	1050.08	1301.68	900.662	1028.82	1232.94	751.431	1214.19	1206.52	1007.71	1080.13	1003.47	1032.72	1167.84	1102.17	1393.71	956.635	1051.98	1306.86	1044.68
ENSCPOG00000002054	12.7031	0	0	0	0	0	0	0	1.91301	0	0	0	0	2.3687	0	14.2177	0	0	0	0	0	12.8999	0
ENSCPOG00000002058	0	0	71.5589	18.9027	24.5873	44.0824	25.6547	15.6773	0.956505	37.7062	44.2528	9.21009	57.6866	15.7913	35.6423	63.3333	54.6262	16.3928	26.583	18.66	30.6734	47.6306	13.5421
ENSCPOG00000002059	2514.3	1824.19	2071.72	2047.16	1913.71	1522.92	2423.45	1992.98	2088.05	1986.76	3364.13	1595.39	1939.71	1545.18	1756.53	2229.59	1848.19	1991.24	1803.84	2104.85	1897.21	1977.66	1924.92
ENSCPOG00000002061	568.917	511.562	493.931	444.213	542.969	341.015	554.324	511.472	690.597	544.945	555.004	425.711	441.663	450.053	495.337	513.129	420.456	543.854	556.343	608.315	368.081	370.129	407.232
ENSCPOG00000002062	210.508	319.597	260.928	615.282	507.113	483.243	524.088	297.869	302.256	416.564	206.513	429.804	587.682	375.044	624.198	581.632	416.318	502.39	423.428	441.62	548.714	400.891	229.249
ENSCPOG00000002065	751.297	513.637	945.974	809.034	739.668	1044.67	743.985	774.067	675.293	776.569	570.677	731.691	764.347	767.458	859.072	638.503	571.92	719.354	835.464	552.335	527.129	739.266	650.99
ENSCPOG00000002066	7811.49	6492.58	6353.04	6310.66	6402.94	6454.33	7416.94	6139.63	6533.89	6667.72	8061.38	6186.11	7295.55	6481.55	6007.1	7393.19	5683.61	6088.47	6531.81	7411.74	6159.68	8424.66	6722.71
ENSCPOG00000002067	969.971	1162.17	1180.72	1173.86	1107.45	920.741	1089.41	1187.56	1016.77	1024.35	1278.72	863.702	888.734	929.319	1122.28	1036.6	1006.45	1072.28	1056.67	1000.17	898.618	982.38	875.403
ENSCPOG00000002068	142.456	84.0497	16.5807	35.9151	39.9543	10.8127	38.482	32.3345	119.563	22.4442	312.535	33.7703	7.21082	5.52696	15.5364	23.2653	2.48301	174.535	62.6598	2.488	20.449	6.94612	10.6403
ENSCPOG00000002071	70.7743	217.907	148.354	162.563	149.573	217.085	131.022	248.877	243.909	150.825	66.3792	159.642	297.446	180.021	205.629	140.884	176.294	163.928	158.548	134.352	180.632	152.815	177.982
ENSCPOG00000002074	60.7933	129.706	36.6521	70.885	74.7863	52.3999	66.8854	89.1647	65.9989	66.4348	59.0037	49.1205	45.0676	75.0088	72.1986	50.4081	77.8009	72.3211	92.0909	78.3719	63.619	31.7537	48.3648
ENSCPOG00000002078	1097.91	2111.62	2309.08	2597.23	2162.66	2832.09	1425.67	2712.17	1460.58	2242.62	1362.62	2540.96	3026.74	3310.65	2859.61	1582.04	3230.39	2417.45	2363.03	1684.37	2707.21	1609.52	2035.19
ENSCPOG00000002081	29.943	4.1506	29.6708	21.7381	23.5628	49.0729	97.1212	65.6487	58.3468	52.0705	47.0186	18.4202	41.4622	31.5826	23.7616	32.3129	25.6578	38.5712	31.3299	44.784	37.4897	40.6844	27.0843
ENSCPOG00000002083	22.6841	45.6566	8.7267	17.9575	2.04894	19.9619	7.3299	27.4353	32.5212	0	0	5.11672	9.01353	18.9496	16.4503	2.58503	9.10437	8.67853	30.3805	2.488	3.40816	4.96152	0
ENSCPOG00000002085	862.902	1260.75	685.919	742.875	617.756	726.944	894.248	719.197	889.55	792.728	1084.19	795.138	933.801	652.971	837.138	1002.99	693.587	850.496	986.417	1074.81	842.951	846.435	850.253
ENSCPOG00000002086	4529.56	4556.33	5351.21	4949.67	6394.74	5180.93	5241.8	4605.21	3650.98	5994.39	5574.01	4414.7	5424.34	5737.78	4897.62	4783.6	4605.98	3947.77	5369.76	4490.84	3885.3	5449.73	4783.28
ENSCPOG00000002087	605.211	734.657	848.235	741.93	664.881	860.855	626.707	750.551	647.554	768.489	674.855	799.231	843.666	843.256	840.794	723.809	845.878	810.96	787.995	824.771	880.441	647.974	623.906
ENSCPOG00000002088	883.772	1173.58	1143.2	1292.94	1021.4	1033.86	1008.78	1121.91	1119.11	950.735	1301.77	1195.27	1186.18	1071.44	1230.12	1308.03	1126.46	1103.14	1240.85	1236.53	1159.91	660.874	862.828
ENSCPOG00000002091	137.919	233.472	178.897	215.49	201.821	178.825	147.514	173.43	135.824	180.451	137.368	178.062	198.298	187.127	220.251	183.537	174.638	170.678	153.801	145.548	220.394	135.946	185.721
ENSCPOG00000002092	244.988	87.1627	13.9627	68.9948	0	13.3079	15.576	42.1328	59.3033	15.262	1105.4	73.6807	19.8298	17.3705	42.0397	27.1428	81.9393	336.534	9.49391	23.636	6.81632	0	2.90189
ENSCPOG00000002095	4.53682	0	0	7.56107	0	6.65395	21.0735	0	25.8256	0	0	0	1.80271	0	7.31125	0	5.79369	0	0	9.95199	11.3605	6.94612	0
ENSCPOG00000002096	217.767	230.359	80.2856	79.3912	102.447	102.305	76.0477	72.5076	131.041	101.448	237.859	136.105	120.781	82.1149	87.735	142.177	84.4223	147.535	100.635	105.74	123.83	184.568	77.3837
ENSCPOG00000002097	0.907363	0	0	2.8354	0	0.831744	0	0	0	1.79553	0	3.07003	0	0	0	0	0.82767	0	0	0	0	2.97691	2.90189
ENSCPOG00000002098	117.957	157.723	150.099	174.85	187.478	197.123	122.776	127.378	194.171	104.141	153.963	146.338	169.454	220.289	135.258	298.571	146.498	148.499	128.168	176.648	210.17	151.822	187.655
ENSCPOG00000002099	264.043	236.584	393.574	314.73	373.932	325.212	390.317	325.304	336.69	347.436	409.338	276.303	326.29	303.193	292.45	383.877	365.83	334.605	295.261	240.092	228.347	281.814	336.619
ENSCPOG00000002100	49.905	33.2048	68.0683	57.6532	119.863	32.438	43.9794	22.5361	57.3903	23.3419	60.8476	22.5136	90.1353	52.1114	55.7483	117.619	52.9709	75.2139	9.49391	58.4679	104.517	50.6075	47.3975
ENSCPOG00000002101	552.584	536.466	549.782	435.707	541.945	400.069	517.674	437.005	449.557	482.101	403.807	568.979	648.974	516.376	537.377	620.407	552.883	649.925	381.655	553.579	562.346	436.613	520.405
ENSCPOG00000002102	1037.12	1174.62	1229.59	1422.43	1231.41	1819.02	1619.91	1455.05	1044.5	1401.41	614.929	1412.21	1824.34	1802.58	1351.67	882.788	1743.9	1537.06	1733.59	1518.92	1516.63	1273.13	1437.4
ENSCPOG00000002104	0	0	4.36335	2.8354	0	14.1397	2.74871	1.95966	0.956505	0.897767	0	19.4435	0	2.3687	0.913906	0	8.2767	8.67853	3.79756	0	1.13605	4.96152	11.6076
ENSCPOG00000002107	0	0	4.36335	6.61594	0	0	4.58119	6.85882	8.60855	0	0	12.2801	0	7.89566	1.82781	0	4.96602	9.64281	10.4433	0	4.54421	3.96921	0
ENSCPOG00000002110	127.031	37.3554	52.3602	37.8053	68.6395	47.4094	81.5452	45.0723	50.6948	46.6839	63.6134	34.7937	9.01353	41.847	32.9006	16.8027	43.8665	47.2498	34.1781	58.4679	42.034	40.6844	34.8227
ENSCPOG00000002114	1830.15	1116.51	1205.16	1274.04	1300.05	1189.39	1725.28	1197.35	1322.85	1426.55	2284.55	1091.91	1105.06	1124.34	1155.18	1414.01	1088.39	1311.42	1257.94	1260.17	1151.96	1363.42	1323.26
ENSCPOG00000002117	0	0	0	0	0	0	0	0	0	0	4.60967	0	0	1.57913	0	0	0	0	1.89878	0	0	0	0
ENSCPOG00000002118	1874.61	2395.94	2535.11	2258.87	2053.04	2718.14	2231.04	2384.91	2020.14	2295.59	1501.83	2338.34	1957.74	2870.07	2639.36	1852.17	2478.04	2086.7	2573.8	2079.97	2386.85	2009.41	2427.91
ENSCPOG00000002121	3066.89	2025.49	2028.96	2011.24	2571.42	2785.51	3900.42	2351.6	2690.65	2664.57	6009.16	2768.14	2017.23	1758.36	2215.31	3417.41	3739.41	3383.66	3736.8	2178.24	1504.13	2338.86	3958.18
ENSCPOG00000002122	2371.85	1420.54	2214.84	1532.06	1567.44	1673.47	2748.71	1655.92	2301.35	2274.04	4074.94	1625.07	1871.21	1675.46	1574.66	2307.14	1450.08	2065.49	3407.36	2592.49	1982.41	2249.55	1883.33
ENSCPOG00000002124	9984.62	7722.2	8359.31	7615.89	8413.98	7639.57	9641.57	8172.78	8426.81	8649.99	10496.2	8218.47	9666.11	8194.12	7345.06	10395.7	7063.33	7915.78	8503.7	10447.1	7781.96	9970.66	8556.7
ENSCPOG00000002125	183.287	136.97	213.804	329.852	206.943	199.619	131.938	295.909	196.084	172.371	182.543	220.019	160.441	162.651	239.443	115.034	212.711	211.178	203.17	128.132	256.748	130.984	207.001
ENSCPOG00000002126	0	0	0	2.8354	0	6.65395	2.74871	0	0	0	1.84387	7.1634	0	9.47479	0	0	0.82767	14.4642	0.949391	12.44	1.13605	5.95382	3.86918
ENSCPOG00000002128	3862.65	2782.98	2887.67	2915.74	3072.39	2405.4	3306.7	2397.65	3225.34	2751.66	3856.45	2811.12	2574.26	2776.11	2779.19	3173.13	2933.26	3035.56	2967.8	2920.91	2311.87	3202.16	2815.8
ENSCPOG00000002131	1957.18	2227.84	2095.28	2147.34	2429.02	2307.26	2576.46	2539.72	1986.66	2591.85	2528.86	1592.32	2487.73	2226.58	2135.8	2282.58	2163.53	2075.13	2210.18	1996.62	2005.13	2656.4	1940.4
ENSCPOG00000002132	49.905	28.0166	31.4161	67.1045	85.0311	49.0729	52.2256	56.8303	43.9992	59.2526	75.5985	76.7508	57.6866	64.7444	61.2317	37.4829	66.2136	62.6783	78.7995	41.052	46.5782	59.5382	35.79
ENSCPOG00000002134	2649.5	1440.26	1649.35	1826.94	1618.66	1332.45	2298.84	1703.93	1855.62	1700.37	3016.56	1521.71	1159.14	1665.19	1796.74	1769.45	1564.3	1834.06	1789.6	1572.41	1368.94	1661.12	1205.25
ENSCPOG00000002138	262.228	386.006	438.08	395.066	483.55	399.237	206.153	391.933	368.255	403.097	289.487	507.578	488.533	381.36	479.801	236.53	396.454	381.855	337.034	317.22	373.761	304.637	280.516
ENSCPOG00000002139	166.955	240.735	458.152	406.407	572.679	361.809	302.358	620.234	373.994	387.835	318.989	448.224	456.084	420.049	519.099	347.687	535.502	377.998	329.439	338.368	469.19	333.414	289.221
ENSCPOG00000002140	692.318	1472.43	1144.07	1055.71	1050.08	1126.18	842.022	1195.4	1335.28	1270.34	548.55	1327.28	670.606	1236.46	1450.37	974.557	1201.78	1118.57	1041.48	1044.96	1209.9	967.496	1170.43
ENSCPOG00000002143	555.306	540.616	318.525	436.652	383.152	469.104	547.91	625.133	594.946	437.213	659.182	598.656	488.533	421.628	475.231	664.353	430.388	447.426	817.426	510.039	449.877	490.198	571.672
ENSCPOG00000002144	593.416	609.101	522.729	514.153	574.728	705.319	615.712	491.876	669.554	615.868	675.777	801.278	618.328	682.975	603.178	673.401	681.172	688.497	480.392	721.519	636.19	607.29	568.77
ENSCPOG00000002147	2293.81	2298.4	2892.03	2955.43	3341.82	2917.76	2525.15	2476.04	2646.65	2794.75	1938.83	3039.33	3143.92	3305.12	3065.24	2596.66	3373.58	2205.31	2890.9	2806.46	3084.38	2761.58	2492.72
ENSCPOG00000002148	203.249	159.798	117.81	105.855	119.863	158.863	155.76	101.903	155.91	121.199	82.974	144.291	124.387	144.491	116.066	108.571	129.116	153.321	89.2428	136.84	107.925	111.138	133.487
ENSCPOG00000002149	1.81473	29.0542	8.7267	18.9027	10.2447	12.4762	11.9111	19.5966	3.82602	6.28437	11.9851	31.7236	12.6189	21.3183	18.2781	3.87755	8.2767	4.8214	2.84817	16.172	23.8571	3.96921	4.83648
ENSCPOG00000002150	320.299	543.729	567.236	697.509	739.668	637.116	582.727	621.213	541.382	585.344	597.413	806.395	753.531	809.305	822.515	669.523	797.046	609.426	674.068	584.679	653.23	669.805	649.056
ENSCPOG00000002152	392.888	386.006	461.642	488.634	464.085	503.205	408.642	528.129	459.123	415.666	310.691	662.103	441.663	632.442	551.085	380	594.267	533.247	548.748	563.531	535.081	389.975	456.564
ENSCPOG00000002153	3.62945	47.732	22.6894	28.354	35.8565	26.6158	12.8273	10.7782	31.5647	23.3419	10.1413	5.11672	45.0676	15.7913	19.192	69.7958	19.0364	27.9641	57.9129	18.66	19.3129	23.8153	38.6918
ENSCPOG00000002154	80.7553	37.3554	111.702	90.7328	80.9332	98.1458	109.032	86.2252	123.389	184.94	92.1933	72.6574	164.046	57.6383	59.4039	54.2856	158.913	145.606	227.854	77.1279	146.551	148.846	85.122
ENSCPOG00000002155	461.848	412.985	471.242	370.492	449.743	326.875	430.632	496.775	426.601	376.164	413.026	621.17	268.603	403.468	469.748	277.891	445.286	422.355	412.985	298.56	266.972	269.907	531.045
ENSCPOG00000002157	22.6841	0	0	0	0	2.49523	0	0	0	0	0	0	0	0	0	0	0	0	0	1.244	0	8.93073	0
ENSCPOG00000002158	813.905	1204.71	610.869	724.918	425.155	703.656	679.848	500.694	1210.94	556.616	720.952	1222.9	365.949	459.527	562.966	679.863	655.514	562.176	741.475	507.551	580.523	689.651	714.832
ENSCPOG00000002159	0	0	2.61801	0	0	0	3.66495	0.979832	0	3.59107	4.60967	0	0	0	3.65562	0	0	0	0	2.488	0	0	0
ENSCPOG00000002160	0	0	0	18.9027	0	8.31744	8.24614	2.9395	0	9.87544	0	0	10.8162	3.94783	4.56953	0	11.5874	0	0	2.488	6.81632	1.98461	1.93459
ENSCPOG00000002161	0	49.8073	0.87267	60.4886	10.2447	39.9237	30.2358	47.0319	2.86952	54.7638	32.2677	106.428	36.0541	45.0053	8.22515	37.4829	24.8301	44.3569	14.2409	29.856	21.585	41.6767	33.8554
ENSCPOG00000002162	68.9596	128.669	130.028	105.855	89.1289	127.257	87.0426	70.5479	124.346	109.528	88.5056	135.081	104.557	79.7462	116.98	95.6461	110.08	86.7853	108.231	84.5919	104.517	79.3843	110.272
ENSCPOG00000002165	77.1259	132.819	92.503	165.398	87.08	170.508	134.687	102.882	91.8245	72.7191	110.632	104.381	84.7272	128.699	102.357	69.7958	180.432	91.6067	34.1781	99.5199	139.735	108.161	133.487
ENSCPOG00000002166	3.62945	1.03765	2.61801	0.945134	1.02447	1.66349	2.74871	3.91933	0.956505	0	2.7658	0	1.80271	2.3687	2.74172	3.87755	4.96602	2.89284	2.84817	3.732	1.13605	1.98461	1.93459
ENSCPOG00000002167	269.487	153.572	262.674	181.466	398.519	219.58	301.442	219.482	269.734	291.774	288.565	184.202	207.311	231.343	262.291	253.333	392.315	283.499	262.032	131.864	139.735	306.622	171.211
ENSCPOG00000002168	0	0	0	0	0	0	0	0	0	0	6.45353	0	0	0.789566	0	0	4.13835	0	0	0	0	0.992303	1.93459
ENSCPOG00000002169	34.4798	88.2003	46.2515	74.6656	79.9087	103.136	67.8016	68.5882	49.7383	57.4571	40.5651	91.0776	27.0406	75.7983	127.947	42.653	104.286	130.178	60.761	65.9319	84.0679	62.5151	103.501
ENSCPOG00000002171	1127.85	1298.1	1058.55	1222.06	1279.56	992.271	1321.21	1154.24	1052.16	1024.35	1777.49	879.052	1128.49	944.321	1053.73	1366.19	1000.65	1090.6	1047.18	1321.13	1088.34	1336.63	986.642
ENSCPOG00000002172	692.318	999.258	1031.5	937.573	1231.41	901.611	998.699	1010.21	1017.72	876.221	802.082	1094.98	890.536	1037.49	938.582	939.659	910.437	825.424	959.834	915.583	828.183	841.473	886.043
ENSCPOG00000002173	1392.8	970.204	950.338	821.321	971.198	786.83	1197.52	924.961	1049.29	900.46	1626.29	950.686	832.85	811.674	748.489	1451.49	688.621	908.353	890.529	849.651	815.686	1083.6	971.165
ENSCPOG00000002175	899.197	1861.55	1663.31	2193.66	2733.29	2427.86	852.101	2378.05	1102.85	2125.01	839.881	1733.54	2963.65	3062.73	2426.42	1221.43	2167.67	1862.99	2156.07	2055.09	2216.44	1375.33	1740.17
ENSCPOG00000002176	730.427	809.368	777.549	741.93	618.78	721.122	619.377	836.777	680.075	502.75	758.751	655.963	511.968	713.768	713.761	735.441	925.335	809.996	653.181	789.939	755.475	568.59	870.566
ENSCPOG00000002178	136.104	100.652	230.385	198.478	195.674	175.498	89.7913	222.422	183.649	201.998	295.019	120.755	274.011	251.082	179.126	190	173.811	170.678	138.611	213.968	304.462	173.653	158.637
ENSCPOG00000002180	275.838	255.262	73.3043	60.4886	76.8353	49.9046	95.2887	63.6891	229.561	79.0035	150.275	64.4706	64.8974	67.9027	106.927	95.6461	59.5922	369.32	56.9635	33.588	20.449	84.3458	91.8931
ENSCPOG00000002184	23.5914	42.5437	12.2174	40.6407	17.416	9.98093	7.3299	23.516	26.7821	23.3419	0	19.4435	30.646	22.1078	18.2781	3.87755	16.5534	16.3928	21.836	8.70799	20.449	20.8384	22.2478
ENSCPOG00000002191	3330.93	2609.69	3391.2	2829.73	3717.8	3678.8	4111.16	3176.62	3392.72	3181.69	2622.9	2910.39	4164.25	3192.22	3510.31	3286.87	3690.58	3324.84	3554.52	4298.02	3358.17	4091.27	3679.59
ENSCPOG00000002193	1268.49	1773.35	1590.88	1893.1	1585.88	1749.99	1404.59	1978.28	1617.45	1646.51	1111.85	1861.46	1730.6	1915.49	1598.42	1797.89	1566.78	1430.99	1728.84	1868.49	1889.26	1749.43	1695.67
ENSCPOG00000002194	561.658	911.058	761.841	843.059	625.951	642.106	583.643	688.822	1011.98	722.703	823.286	769.554	968.053	736.665	756.714	685.033	729.177	720.318	721.537	803.623	908.842	831.55	808.659
ENSCPOG00000002195	32383.8	27584.9	38298.9	38790.2	39365.3	33743	37524.5	41041.2	37812.6	41522.6	44093.3	31778.9	51618.7	35670.2	39286.1	47944.6	38798.7	37669.6	42630.5	48079.3	46690.6	39552.2	35451.4
ENSCPOG00000002197	1478.09	1165.28	1298.53	1396.91	1478.31	1355.74	1315.72	1144.44	1121.98	1445.41	1960.03	1245.41	1579.17	1228.56	1238.34	1435.98	1294.48	1294.06	1277.88	1184.29	1231.48	1554.94	1381.3
ENSCPOG00000002199	832.052	959.827	1430.31	1264.59	1075.69	1474.68	1100.4	988.65	1172.68	1044.1	1166.25	1290.44	1647.67	1347	1187.16	1156.8	1438.49	1357.71	1488.65	1309.93	1241.71	1357.47	1328.1
ENSCPOG00000002204	590.693	907.945	1141.45	1313.74	1041.89	1208.52	1018.86	1506	947.897	1320.62	671.167	1243.36	1368.25	1645.46	1316.02	934.489	1435.18	1540.92	1378.52	1436.82	1521.17	1129.24	1377.43
ENSCPOG00000002205	2451.7	2731.1	3147.72	2867.54	3130.78	3291.21	3149.11	3555.81	2854.21	2889.91	2954.8	2965.65	3553.13	3728.33	3407.04	2926.25	3849.49	3692.23	3635.22	2966.94	3692.17	2960.04	2809.99
ENSCPOG00000002209	746.76	902.756	1008.81	1069.89	1086.96	967.318	931.814	1075.86	798.682	1031.53	1140.43	914.869	1243.87	1047.75	1008.95	1203.33	914.575	810.96	884.833	1088.5	1145.14	1192.75	968.263
ENSCPOG00000002210	509.938	322.709	394.447	446.103	212.065	125.593	205.237	329.224	255.387	245.09	409.338	373.52	93.7407	267.663	381.099	323.129	369.141	230.463	526.912	150.524	244.251	137.93	338.554
ENSCPOG00000002211	1.81473	0	0	0	0	3.32698	0	0	0	0	1.84387	0	0	0	0	2.58503	0	0	0	0	0	0	1.93459
ENSCPOG00000002212	538.066	406.759	472.114	322.291	437.449	340.183	475.527	353.719	435.21	378.858	636.134	437.991	344.317	405.047	398.463	444.625	409.696	377.034	369.313	451.572	401.027	471.344	420.774
ENSCPOG00000002213	3042.39	4260.6	4125.98	3890.17	4302.78	5067.82	3675.03	4224.06	3430.03	4169.23	2069.74	3863.12	4075.92	5586.97	4455.29	3129.18	3728.65	3247.7	4402.33	3493.15	3079.84	3487.95	3397.14
ENSCPOG00000002214	1260.33	1423.66	1055.93	1252.3	1201.7	1276.73	1185.61	1262.02	1403.19	1027.94	975.405	1511.48	690.436	1519.91	1340.7	864.693	1419.45	1421.35	1546.56	852.139	932.699	1058.79	1185.9
ENSCPOG00000002218	871.069	988.882	691.155	680.496	775.524	780.176	670.686	714.298	725.031	635.619	473.874	899.519	942.815	581.91	690.913	1024.96	664.619	707.782	581.977	926.779	891.802	988.334	667.434
ENSCPOG00000002222	0	0	0	0	4.09788	0	0	2.9395	0	0	0	0	3.60541	3.15826	0	0	0	0	0	0	0	0	0
ENSCPOG00000002223	659.653	802.104	658.866	551.958	500.966	763.541	799.876	733.894	734.596	560.207	425.933	549.535	283.025	445.315	736.608	321.836	870.708	661.497	710.145	518.747	449.877	411.806	457.531
ENSCPOG00000002224	0	0	0	0	6.14682	6.65395	2.74871	18.6168	0	9.87544	23.9703	0	5.40812	3.94783	5.48344	1.29252	0	7.71425	0	7.46399	0	0	0
ENSCPOG00000002225	241.359	658.908	719.08	666.319	575.752	692.011	514.009	609.456	555.73	538.66	741.234	634.473	856.285	638.759	636.993	542.856	669.585	432.962	584.825	574.727	764.564	509.052	519.438
ENSCPOG00000002226	1283.92	1394.6	1679.02	2042.43	1405.57	1637.7	1620.82	1749	2282.22	1416.68	1051	1614.84	1813.52	1357.26	1654.17	1684.15	1709.14	1497.53	1690.87	1857.29	1957.42	1406.09	1561.22
ENSCPOG00000002227	193.268	217.907	256.565	271.253	298.121	210.431	278.536	219.482	290.778	275.615	368.773	279.373	429.044	360.042	318.039	214.558	353.415	211.178	296.21	241.336	251.068	274.868	297.927
ENSCPOG00000002230	23.5914	70.5603	17.4534	104.91	20.4894	19.1301	34.817	69.5681	66.9554	35.0129	70.9888	38.8871	36.0541	113.697	82.2515	25.8503	49.6602	101.249	51.2671	46.028	73.8434	49.6152	97.6969
ENSCPOG00000002231	196.898	207.53	261.801	184.301	215.139	151.377	156.677	214.583	160.693	258.557	236.937	192.389	127.992	147.649	240.357	164.149	187.053	269.999	224.056	144.304	161.32	118.084	201.198
ENSCPOG00000002233	163.325	409.872	164.935	432.871	447.694	475.758	267.541	276.313	295.56	167.882	229.561	405.244	227.141	465.844	459.695	152.517	168.017	424.284	128.168	126.888	112.469	200.445	288.254
ENSCPOG00000002238	2468.03	1988.14	2150.26	2182.31	1951.62	1500.47	2411.54	2112.52	2236.31	2293.8	3192.65	2043.62	1681.92	1751.26	1738.25	1819.86	1756.31	1947.85	1810.49	1746.57	1433.7	2081.85	1956.84
ENSCPOG00000002241	3503.33	3574.71	2760.26	2767.35	2122.7	3133.18	3546.76	3101.17	3986.71	2576.59	3076.49	2971.79	2527.39	2938.76	2976.59	3028.36	2194.98	3091.48	2269.99	2910.96	2970.78	3060.26	3818.88
ENSCPOG00000002242	349.335	306.107	397.065	429.091	263.289	321.885	285.866	361.558	417.993	347.436	362.32	323.377	261.392	326.88	444.158	301.156	365.83	374.141	476.594	332.148	369.217	396.921	396.591
ENSCPOG00000002245	156.066	194.041	82.031	225.887	48.1501	68.203	166.755	120.519	205.649	160.7	157.651	94.1476	126.189	108.96	137.086	137.007	158.913	125.357	64.5586	129.376	131.782	182.584	159.604
ENSCPOG00000002249	38.1093	237.622	182.388	241.009	185.429	224.571	245.552	200.866	241.039	230.726	247.078	114.614	299.249	276.348	208.371	210.68	224.298	230.463	266.779	226.408	207.898	214.338	191.525
ENSCPOG00000002250	1.81473	0	1.74534	0	0	2.49523	0	4.89916	0	0	0.921933	9.21009	16.2243	0.789566	0	0	0	4.8214	11.3927	1.244	5.68026	3.96921	0.967296
ENSCPOG00000002251	448.237	446.19	468.624	453.664	372.907	499.046	376.574	550.666	339.559	500.954	332.818	330.54	398.398	509.27	489.854	218.435	482.531	523.605	492.734	248.8	316.959	317.537	526.209
ENSCPOG00000002254	1567.02	3005.04	2574.38	3146.35	2798.85	3182.25	2111.01	2980.65	2496.48	2833.35	2012.58	3146.78	3282.73	3211.16	2770.96	2295.51	3241.15	2595.84	2647.85	2458.14	3037.81	2410.3	2514
ENSCPOG00000002255	1540.7	2334.72	2464.42	2724.82	2397.26	2600.03	1837.97	2740.59	1686.32	2735.5	2023.64	2916.53	3012.32	2915.87	2638.45	2048.64	2218.15	2382.74	2390.57	2616.13	2519.77	1949.88	2619.44
ENSCPOG00000002256	2128.67	2223.69	2551.69	2430.88	2488.44	2686.53	2268.6	2577.94	1914.92	2241.72	1962.8	2751.77	2419.23	3067.46	2760	2113.26	2758.62	2190.85	2675.38	2158.34	2330.04	2532.36	2413.4
ENSCPOG00000002257	148.808	162.911	176.279	172.014	216.163	279.466	215.316	155.793	168.345	161.598	60.8476	161.688	61.292	262.136	229.39	24.5578	199.468	115.714	234.5	51.0039	20.449	128.999	216.674
ENSCPOG00000002258	438.256	857.1	556.763	565.19	512.235	574.735	460.868	563.403	576.773	361.8	596.491	583.306	519.179	516.376	514.529	478.231	482.531	407.891	461.404	521.235	472.598	538.821	561.999
ENSCPOG00000002259	2140.47	2451.97	3069.18	3095.31	3412.51	3193.9	2830.26	3057.08	2427.61	3069.47	2693.89	3035.24	3978.57	3680.17	3214.21	2296.8	3425.72	2650.81	3091.22	2775.36	2931.02	3088.05	2667.8
ENSCPOG00000002260	290.356	218.944	118.683	71.8302	85.0311	131.416	119.111	102.882	228.605	66.4348	96.803	107.451	43.2649	48.9531	88.6489	122.789	81.9393	114.749	151.903	62.1999	35.2176	76.4074	84.1548
ENSCPOG00000002261	0	0	0	0	0	2.49523	0	0	0	0	0	0	0	0	0	1.29252	0	0	0	0	0	0	1.93459
ENSCPOG00000002263	736.779	920.397	796.748	939.463	987.59	915.75	666.105	885.768	750.857	962.406	965.264	935.336	1020.33	949.848	922.131	1088.3	1013.07	1005.74	898.124	920.559	1111.06	869.258	785.444
ENSCPOG00000002264	665.097	813.518	877.033	917.725	845.188	894.957	829.195	853.434	784.334	861.856	798.394	768.531	778.769	906.422	957.774	756.122	1007.27	836.032	996.861	791.183	824.774	1015.13	768.033
ENSCPOG00000002265	0	43.5813	108.211	43.4761	97.3247	29.111	57.723	130.318	106.172	61.9459	58.0818	12.2801	171.257	85.2731	25.5894	34.8979	158.913	100.285	62.6598	118.18	138.598	150.83	29.0189
ENSCPOG00000002266	8.16627	21.7907	11.3447	10.3965	0	2.49523	1.83248	0.979832	1.91301	8.0799	0	9.21009	0	6.31653	2.74172	0	1.65534	3.85712	3.79756	4.97599	0	2.97691	1.93459
ENSCPOG00000002267	2437.18	2466.5	2014.12	2188.93	2169.83	1992.86	2444.52	2110.56	2183.7	2389.86	3746.74	1830.76	2532.8	2024.45	1943.88	2786.66	1895.36	1932.42	1917.77	2459.39	2343.68	2665.33	2040.03
ENSCPOG00000002268	527.178	522.976	615.232	1058.55	496.868	809.287	600.136	716.257	394.08	434.519	383.524	773.648	337.106	870.891	734.78	513.129	801.184	584.354	651.282	490.135	460.101	358.222	876.37
ENSCPOG00000002270	234.1	605.988	571.599	322.291	169.038	325.212	301.442	564.383	449.557	284.592	396.431	229.229	351.528	288.192	441.417	254.626	144.015	187.07	178.486	840.943	570.299	399.898	544.588
ENSCPOG00000002271	48.9976	62.2591	109.956	103.02	87.08	29.9428	46.7281	209.684	215.214	73.6169	46.0967	55.2605	126.189	93.1688	58.49	99.5237	130.772	128.249	67.4068	95.7879	170.408	72.4381	49.3321
ENSCPOG00000002272	179.658	189.89	152.717	190.917	108.594	180.488	251.049	201.845	192.258	191.224	217.576	168.852	237.957	174.494	180.039	262.381	165.534	197.678	154.751	242.58	229.483	177.622	214.74
ENSCPOG00000002273	0	9.33886	8.7267	0	0	0	1.83248	0	2.86952	5.3866	0	0	3.60541	23.687	7.31125	3.87755	0	12.5357	0	0	11.3605	0.992303	4.83648
ENSCPOG00000002274	51721.5	55485.3	62484.9	53493.6	41639.6	42051.3	69045.8	67943.5	67492	45985.4	69200.3	52243.7	44070.7	44290.7	49277.8	60038.6	38459.3	60474.9	48310.7	64214	49982.9	48777.7	67352.8
ENSCPOG00000002275	1522.56	2159.35	2151.13	1561.36	1729.31	2286.46	1439.41	1862.66	965.114	2085.51	912.714	1591.3	1252.88	1703.09	2058.12	1454.08	1993.03	1631.56	1734.54	1798.82	1649.55	1096.5	1408.38
ENSCPOG00000002276	1306.6	1029.35	1168.51	1039.65	1071.6	1112.87	1220.43	902.425	1069.37	1005.5	1368.15	966.036	931.999	1061.18	1030.89	996.529	1056.93	1194.74	1284.53	939.219	797.509	1132.22	1037.91
ENSCPOG00000002277	0	0	4.36335	4.72567	0	1.66349	6.41366	3.91933	0	10.7732	4.60967	0	1.80271	3.94783	3.65562	2.58503	4.96602	7.71425	10.4433	4.97599	7.95237	0.992303	0
ENSCPOG00000002278	6576.57	5872.07	7368.83	6441.09	5061.91	5312.35	6998.22	5052.99	6194.33	5884.86	4952.62	5101.37	7499.25	5857.79	6619.42	6560.81	5883.9	7010.32	6728.34	7460.26	6541.39	7542.5	6219.71
ENSCPOG00000002280	0	14.5271	0	0	0	3.32698	3.66495	0.979832	0.956505	6.28437	22.1264	11.2568	0	0	0	14.2177	22.3471	0	0	4.97599	0	0.992303	0
ENSCPOG00000002282	250.432	435.813	454.661	307.168	419.008	318.558	371.076	332.163	390.254	417.462	436.996	252.766	310.065	363.2	371.96	439.455	339.345	341.355	342.73	332.148	331.727	364.175	395.624
ENSCPOG00000002283	462.755	300.919	229.512	250.46	204.894	222.907	323.432	195.966	303.212	220.851	508.907	226.159	167.652	206.077	260.463	261.088	189.536	282.534	204.119	171.672	173.816	240.137	254.399
ENSCPOG00000002285	0	4.1506	0	2.8354	0	7.4857	0	12.7378	7.65204	0	0	11.2568	0	0.789566	3.65562	7.75509	2.48301	0.964281	0.949391	3.732	1.13605	0.992303	0
ENSCPOG00000002287	1242.18	1329.23	1191.19	1245.69	1239.61	1355.74	1341.37	1141.5	1123.89	1021.66	981.859	1585.16	1310.57	1263.31	1266.67	1266.67	1582.5	1354.81	1386.11	1206.68	1367.81	1318.77	1311.65
ENSCPOG00000002288	0.907363	8.30121	0	0	0	0	0	0	0	0	0.921933	0	0	0.789566	0	10.3401	0.82767	1.92856	0	2.488	0	6.94612	0
ENSCPOG00000002289	1332.01	1275.27	1468.7	1465.9	1582.81	1381.53	1743.6	1365.89	1440.5	1809	1499.06	1405.05	1651.28	1497.02	1350.75	1601.43	1366.48	1403.03	1443.07	1608.49	1464.37	1701.8	1459.65
ENSCPOG00000002290	5830.72	5158.16	6568.59	7638.57	7700.94	7712.76	7186.97	7907.24	5786.86	7748.63	7590.27	8070.09	10250.2	8697.07	7809.33	7095.91	7616.22	7748.96	7911.28	8174.32	8187.53	8097.2	7296.31
ENSCPOG00000002291	170.584	169.137	170.171	219.271	207.968	173.835	174.085	158.733	193.214	168.78	182.543	237.416	192.889	237.659	154.45	248.163	186.226	170.678	228.803	170.428	178.36	197.468	126.716
ENSCPOG00000002295	1680.44	1199.52	2113.61	1844.9	1776.43	1829.84	1890.2	1747.04	1759.97	1789.25	1241.84	1292.48	1559.34	2041.03	1910.98	1505.78	2001.31	2131.06	1907.33	1615.95	1608.65	1515.25	1918.15
ENSCPOG00000002296	1772.08	1770.23	2342.25	1990.45	2165.73	2334.71	2194.39	2052.75	1674.84	2002.92	1695.43	2193.03	1508.86	2040.24	1959.41	1982.72	2228.91	1974.85	2308.92	2070.01	1687.04	1744.47	2238.32
ENSCPOG00000002297	1952.65	1628.07	2734.08	2170.97	2852.13	4059.74	1565.85	2615.17	1778.14	3057.8	2024.56	2248.29	1557.54	3927.3	3750.67	1284.76	2689.93	2701.91	2810.2	1532.61	1443.92	1513.26	3294.61
ENSCPOG00000002298	1440.89	1137.27	1436.41	1068	1218.1	1279.22	1330.38	1089.57	1479.71	1299.07	1134.9	1310.9	832.85	1303.57	1295	897.006	1287.85	1348.06	1338.64	1015.1	1156.5	965.511	1443.21
ENSCPOG00000002301	1834.69	1936.26	2956.61	2631.25	2450.53	2929.4	2288.76	2326.12	2109.09	2933.01	1452.04	1943.33	2931.2	3036.67	2823.06	2004.69	3361.17	2130.1	2706.71	2497.95	2690.17	2785.4	2417.27
ENSCPOG00000002303	15.4252	9.33886	0	3.78053	10.2447	3.32698	12.8273	0.979832	12.4346	10.7732	24.8922	42.9804	3.60541	4.7374	0.913906	0	5.79369	6.74997	4.74696	11.196	7.95237	3.96921	2.90189
ENSCPOG00000002305	2233.02	1759.86	1876.24	1945.09	1761.06	1531.24	2423.45	1679.43	2012.49	1816.18	2271.64	2038.5	1669.31	2059.98	1766.58	1808.23	1868.88	1775.24	2037.39	1829.92	1668.86	2066.97	2000.37
ENSCPOG00000002306	562.565	577.972	472.114	554.793	600.34	551.446	672.518	545.766	770.943	447.986	742.156	533.162	392.99	441.367	470.662	722.516	526.398	506.247	546.849	445.352	408.979	605.305	548.457
ENSCPOG00000002309	1025.32	1118.59	711.226	608.666	812.405	636.284	674.351	789.745	1034.94	623.05	1092.49	900.542	726.49	669.552	696.396	1089.59	679.517	875.567	716.79	640.659	782.74	898.035	774.804
ENSCPOG00000002310	180.565	76.7862	84.649	77.501	106.545	75.6887	92.54	72.5076	64.0859	108.63	217.576	178.062	86.5299	80.5357	62.1456	124.081	145.67	154.285	144.307	88.3239	85.204	91.2919	116.076
ENSCPOG00000002312	266.765	239.697	220.786	235.338	225.384	261.168	323.432	204.785	258.256	293.57	440.684	213.879	93.7407	240.818	242.185	113.741	172.983	214.07	201.271	119.424	101.109	95.2611	251.497
ENSCPOG00000002313	131.568	121.405	130.028	139.88	103.472	145.555	153.928	161.672	165.475	143.643	79.2862	141.221	90.1353	123.172	149.881	164.149	100.976	121.499	116.775	162.964	140.871	159.761	163.473
ENSCPOG00000002315	507.216	619.478	417.136	530.22	329.879	604.678	351.835	667.266	642.772	451.577	300.55	773.648	699.45	514.007	585.814	550.612	453.563	559.283	515.519	456.548	582.795	458.444	658.729
ENSCPOG00000002316	1127.85	1326.12	1374.46	1250.41	1320.54	1515.44	1714.28	1488.36	1098.07	1150.04	1030.72	1399.93	1346.62	1848.37	1379.08	1118.03	1220.81	1375.06	1191.49	1445.53	1183.77	1331.67	1846.57
ENSCPOG00000002318	891.031	386.006	226.894	231.558	239.726	436.666	607.466	730.955	555.73	402.2	809.457	354.077	41.4622	313.458	171.814	143.469	432.871	236.249	356.022	26.124	69.2992	331.429	271.81
ENSCPOG00000002320	5446.9	7120.36	9012.06	9011.85	8882.16	9740.56	7077.94	10343.1	6332.07	10375.5	6707.98	7788.67	12838.9	10332.3	9420.54	8468.56	9201.2	8129.85	8276.79	9925.87	10023.4	9438.79	8350.67
ENSCPOG00000002322	0	2.0753	0	0	0	0	0	0	0	0	0	0	0	0	0.913906	0	0	0	0	0	2.27211	3.96921	1.93459
ENSCPOG00000002324	445.515	199.229	166.68	113.416	178.258	72.3617	165.839	57.8101	210.431	260.352	529.19	29.677	142.414	219.499	234.874	250.748	207.745	163.928	81.6476	455.304	206.762	269.907	136.389
ENSCPOG00000002325	29.943	0	0	2.8354	0	9.14919	0	0	0	0	14.7509	0	0	4.7374	10.053	1.29252	1.65534	0	0	4.97599	0	0	0
ENSCPOG00000002329	0	2.0753	0	0.945134	0	0.831744	0	0	0	0	0.921933	0	1.80271	0.789566	0	3.87755	0	0.964281	0	0	0	0.992303	0
ENSCPOG00000002330	14991.5	11589.5	18137.6	15645.7	18391.3	15853	16089.1	17428.3	26077.2	13102.9	12822.2	13624.8	20298.5	10037	17862.3	15260.7	14154.8	17597.2	18967.9	26376.5	18623.3	7647.68	15324.9
ENSCPOG00000002331	758.556	1147.64	685.046	605.831	705.86	830.081	565.319	760.35	920.158	534.171	580.818	901.566	461.493	760.352	711.933	714.761	827.67	865.924	941.796	547.359	630.509	657.897	780.608
ENSCPOG00000002332	1229.48	1456.86	1089.09	1610.51	1691.4	1334.95	1377.11	2142.89	2130.14	1119.52	887.822	1660.89	1276.32	1208.04	1717.23	1795.3	1405.38	1533.21	1463.96	1659.49	1740.43	1319.76	1532.2
ENSCPOG00000002334	1262.14	1569.97	1016.66	1099.19	1300.05	1257.6	1043.59	1220.87	1298.93	1150.04	1351.55	1637.35	1074.41	1238.83	1156.09	1472.18	1333.38	1214.99	1280.73	1015.1	1125.83	1138.17	1197.51
ENSCPOG00000002335	5639.26	5363.62	4960.26	4398.65	4598.85	4378.3	5324.26	4527.8	5105.83	4320.95	4897.31	5614.06	3661.29	4470.52	4543.94	4539.31	4481.83	5141.55	4826.7	4418.68	4262.47	4707.49	4902.26
ENSCPOG00000002337	419.202	506.374	601.27	592.599	555.263	484.075	650.529	492.855	472.514	538.66	649.041	465.621	969.856	482.425	513.615	730.271	460.184	363.534	458.556	671.759	583.931	718.428	513.634
ENSCPOG00000002338	381.093	370.441	337.723	328.907	171.087	315.231	294.112	499.714	404.602	253.17	356.788	597.633	504.758	405.047	486.198	295.986	398.109	537.104	303.805	379.42	636.19	389.975	542.653
ENSCPOG00000002339	0	0	0	2.8354	0	0	0	0	1.91301	0	0	0	1.80271	0	1.82781	0	0	0	0	0	0	0.992303	0.967296
ENSCPOG00000002341	550.769	892.38	722.571	714.521	666.93	802.633	694.508	709.398	922.071	799.013	533.799	774.671	641.763	601.649	784.131	819.455	811.944	681.747	555.394	751.375	808.87	738.274	619.069
ENSCPOG00000002342	1826.52	1878.15	2169.46	1689.9	1801.02	2039.44	1825.15	1827.39	1538.06	1931.99	2125.98	1993.47	2184.88	2259.74	1888.13	2100.34	1770.39	1501.39	1987.08	1971.74	1829.05	2213.83	1729.53
ENSCPOG00000002347	0	0	0	0	0	0	0	0	0	0	0	0	1.80271	0	0	3.87755	0.82767	0	0	1.244	1.13605	4.96152	0.967296
ENSCPOG00000002349	342.076	331.011	376.121	327.016	434.375	329.371	326.181	260.635	341.472	374.369	417.636	249.696	364.146	357.673	308.9	453.673	369.141	273.856	270.576	410.52	343.088	354.252	298.894
ENSCPOG00000002351	161.511	50.8449	90.7577	42.531	75.8108	94.8188	68.7178	98.963	155.91	67.3325	61.7695	74.7041	63.0947	90.0105	74.0264	27.1428	114.218	75.2139	96.8379	82.1039	52.2584	74.4228	124.781
ENSCPOG00000002352	51.7197	33.2048	37.5248	73.7204	67.6151	65.7078	38.482	44.0924	67.9119	55.6616	49.7844	25.5836	50.4758	57.6383	72.1986	59.4557	62.9029	45.3212	65.508	85.8359	56.8026	73.4305	51.2667
ENSCPOG00000002353	1165.96	2291.13	1328.2	1464.01	1492.65	1956.26	1210.35	1532.46	1794.4	1111.44	1029.8	2141.86	1658.49	1455.96	1345.27	1894.83	1527.88	1734.74	1650.99	1736.62	1865.4	2045.14	1490.6
ENSCPOG00000002354	51.7197	68.485	84.649	116.251	42.0033	69.0348	66.8854	64.6689	99.4766	81.6968	118.007	112.568	81.1217	58.4279	70.3708	76.2584	37.2451	40.4998	60.761	52.2479	86.34	55.569	84.1548
ENSCPOG00000002355	10025.5	8105.09	6939.47	6761.49	6036.18	5115.23	8715.25	6423.78	7400.48	6808.67	12745.7	6518.7	5227.85	4997.95	5870.02	6736.59	5239.15	7138.57	5311.84	5140.2	4590.79	5728.57	7818.65
ENSCPOG00000002356	2472.56	1631.19	1187.7	1113.37	1518.27	1757.48	1856.3	897.526	1084.68	864.55	998.453	1616.88	931.999	1482.02	1138.73	1403.67	1161.22	1477.28	2171.26	1423.13	959.965	1217.56	1239.11
ENSCPOG00000002357	14.5178	13.4895	5.23602	12.2867	2.04894	5.82221	1.83248	10.7782	16.2606	7.18214	25.8141	3.07003	9.01353	11.8435	12.7947	12.9252	14.8981	0	10.4433	8.70799	22.7211	7.93843	2.90189
ENSCPOG00000002358	0	0	0	0.945134	0	1.66349	0	0	3.82602	0	0	6.14006	0	0	0	0	0	3.85712	0	0	0	0	1.93459
ENSCPOG00000002359	562.565	670.323	452.043	372.383	398.519	469.104	326.181	414.469	512.687	395.915	356.788	542.372	299.249	371.096	374.701	391.632	367.485	451.283	435.771	334.636	314.687	403.867	450.76
ENSCPOG00000002360	182.38	499.11	575.962	577.477	515.309	1013.06	727.493	1247.33	671.467	694.872	518.126	1170.7	879.72	604.018	523.668	828.502	468.461	1043.35	705.398	811.087	1020.18	1143.13	601.658
ENSCPOG00000002361	1939.04	1833.53	1758.43	1859.08	1933.18	1702.58	1653.81	1797.01	1542.84	1939.18	2202.5	1739.68	2047.87	1922.59	1922.86	1430.81	1900.33	1733.78	1807.64	1785.14	1692.72	1920.11	1576.69
ENSCPOG00000002362	316.67	476.282	368.267	616.227	424.131	538.97	481.941	683.923	483.992	518.012	325.442	580.236	522.785	547.169	525.496	372.244	429.561	498.533	533.558	659.319	612.333	581.49	519.438
ENSCPOG00000002363	4482.37	4669.43	4826.74	4729.45	5464.53	5571.02	4885.38	4741.41	4125.41	5681.07	4010.41	5163.79	6172.46	6599.98	5408.5	4770.67	5278.88	4661.33	5224.5	5028.24	5167.9	5908.17	4655.6
ENSCPOG00000002364	930.047	568.633	756.605	570.861	663.857	587.211	880.504	672.165	814.943	529.683	649.041	866.772	322.684	603.228	686.343	568.707	648.065	827.353	614.256	517.503	506.68	515.005	726.439
ENSCPOG00000002368	0	0	0	0	0	3.32698	0	0.979832	1.91301	0.897767	0	0	0	0	0	0	2.48301	0	0	0	0	0.992303	0
ENSCPOG00000002370	0	29.0542	0	0	0	0	0	0	0	0	23.9703	0	0	0	89.5628	0	0	0	0	0	0	0	0
ENSCPOG00000002371	817.534	458.642	509.639	430.981	536.823	541.465	653.277	342.941	505.991	558.411	588.193	432.874	284.827	371.886	471.576	341.224	482.531	522.64	506.975	248.8	219.258	360.206	569.737
ENSCPOG00000002372	613.378	756.448	746.133	784.461	651.563	625.472	673.435	850.494	602.598	865.448	1041.78	725.551	713.871	665.604	887.403	718.639	1283.72	1100.24	653.181	409.276	568.026	776.974	591.018
ENSCPOG00000002373	2735.7	2774.68	4482.91	3280.56	4542.5	3950.78	3120.71	3374.54	3005.34	3741.89	2244.91	4275.53	3785.68	4325.24	3546.87	3042.58	3427.38	3454.05	3995.99	4202.23	3503.59	4002.95	3470.66
ENSCPOG00000002375	3186.66	4923.65	4448.87	4952.5	3284.45	3747.01	4538.13	4765.9	6109.2	4019.3	4472.3	4461.78	4811.42	4635.54	4805.32	5084.76	4317.12	4692.19	5062.15	5920.19	5313.32	4536.81	4649.79
ENSCPOG00000002376	811.183	927.66	615.232	784.461	575.752	412.545	648.696	818.16	331.907	582.651	330.974	687.687	840.061	620.599	552.913	478.231	928.645	617.14	629.446	439.132	671.407	1105.43	309.535
ENSCPOG00000002378	466.385	647.494	532.329	660.648	660.783	663.732	560.737	700.58	588.251	693.974	310.691	602.749	762.544	544.801	665.324	741.904	631.512	535.176	544.001	680.467	729.346	702.551	628.742
ENSCPOG00000002381	2301.07	1963.24	1560.33	1574.59	1667.84	1354.91	1851.72	1421.74	2246.83	1510.04	2629.35	1550.37	1151.93	1193.82	1421.12	2073.19	1413.66	1540.92	1759.22	1508.97	1356.45	1627.38	1633.76
ENSCPOG00000002382	99.81	43.5813	99.4844	43.4761	102.447	76.5205	46.7281	77.4067	59.3033	68.2303	93.1152	51.1672	50.4758	39.4783	56.6622	65.9183	49.6602	89.6781	67.4068	46.028	38.6258	52.5921	53.2013
ENSCPOG00000002384	293.078	432.701	333.36	325.126	225.384	316.063	351.835	304.728	395.037	368.085	475.717	207.739	454.282	306.352	352.768	467.891	320.308	254.57	298.109	383.152	334	465.39	309.535
ENSCPOG00000002385	51.7197	63.2967	89.885	43.4761	142.401	106.463	43.9794	52.9109	0.956505	93.3678	49.7844	159.642	30.646	100.275	48.437	62.0407	65.3859	3.85712	55.0647	70.9079	63.619	62.5151	118.977
ENSCPOG00000002386	1162.33	923.509	974.772	1105.81	1001.93	1009.74	1055.51	906.345	1082.76	967.793	1364.46	822.768	1306.96	915.107	906.595	1584.62	886.434	971.995	977.873	1216.63	1187.18	1069.7	1052.42
ENSCPOG00000002388	1763.01	707.678	1039.35	823.211	1597.15	1476.35	1346.87	1095.45	835.029	1074.63	690.528	778.764	811.217	1228.56	1337.04	1053.4	1072.66	761.782	1488.65	1027.54	930.427	1810.95	878.305
ENSCPOG00000002390	1175.04	822.857	993.098	1064.22	992.712	990.607	963.882	962.195	1044.5	1194.03	969.874	1068.37	746.32	1071.44	968.74	948.706	878.157	993.209	861.098	857.115	773.652	881.165	981.805
ENSCPOG00000002394	78.9406	69.5226	47.1242	166.344	61.4682	166.349	131.938	65.6487	91.8245	65.537	74.6766	53.2139	59.4893	97.1166	84.9933	87.891	76.9733	96.4281	98.7367	100.764	28.4013	53.5844	84.1548
ENSCPOG00000002396	1684.97	1442.34	1168.51	1208.83	1181.21	1264.25	1206.69	1133.67	1378.32	972.282	750.454	1305.79	931.999	960.902	964.171	975.849	1009.76	1030.82	1324.4	1042.47	855.448	1310.83	1098.85
ENSCPOG00000002397	27.2209	0	12.2174	19.8478	14.3426	4.15872	6.41366	18.6168	17.2171	7.18214	27.658	32.747	3.60541	11.8435	10.9669	3.87755	14.8981	13.4999	21.836	9.95199	18.1768	11.9076	11.6076
ENSCPOG00000002400	346.613	471.094	477.351	453.664	472.281	449.142	449.873	502.654	394.08	492.874	530.112	347.937	515.574	393.993	485.284	467.891	473.427	267.106	397.795	415.496	468.054	438.598	467.204
ENSCPOG00000002401	43.5534	16.6024	31.4161	30.2443	13.3181	29.111	52.2256	38.2134	44.9557	43.0928	43.3309	0	14.4216	26.0557	13.7086	38.7755	28.9684	36.6427	37.0263	65.9319	29.5374	21.8307	27.0843
ENSCPOG00000002406	1844.67	2286.98	2457.44	2663.39	2413.65	2354.67	2142.16	2427.04	2269.79	2546.97	1657.64	2788.61	2440.86	2460.29	2471.2	2289.04	2243.81	2242.92	2159.86	2469.34	2248.25	2371.61	2053.57
ENSCPOG00000002407	1273.03	1827.3	1491.39	1620.9	1451.67	1943.79	1256.16	1424.68	1373.54	1368.2	1159.79	1929	1647.67	1918.65	1574.66	1190.41	1610.65	2010.53	1685.17	1434.33	1629.1	1481.51	1506.08
ENSCPOG00000002409	218.675	289.505	266.164	340.248	141.377	97.3141	186.912	255.736	231.474	235.215	279.346	251.743	306.46	201.339	306.159	341.224	230.92	161.035	176.587	307.268	257.884	203.422	172.179
ENSCPOG00000002410	247.71	312.333	149.227	171.069	204.894	197.955	368.328	340.982	348.168	158.007	230.483	267.093	176.665	175.284	305.245	401.972	216.849	250.713	222.158	233.872	255.612	296.699	275.679
ENSCPOG00000002411	32.6651	13.4895	13.0901	25.5186	20.4894	15.8031	21.0735	24.4958	21.0431	35.0129	11.9851	25.5836	55.8839	33.9513	24.6755	29.7279	36.4175	11.5714	21.836	14.928	28.4013	28.7768	31.9208
ENSCPOG00000002413	0	0	9.59937	0	0	0	3.66495	4.89916	0	0	0	0	16.2243	0	0	18.0952	0	0	0	8.70799	1.13605	6.94612	4.83648
ENSCPOG00000002415	410.128	467.981	294.962	368.602	317.586	297.764	406.81	425.247	485.905	342.049	789.175	255.836	301.052	286.612	298.847	348.979	264.854	321.106	343.68	340.856	360.129	388.983	400.461
ENSCPOG00000002416	1022.6	845.686	859.58	786.351	1006.03	775.186	1102.23	769.168	919.202	939.064	1249.22	782.858	676.015	730.349	877.35	851.768	823.531	829.282	749.07	725.251	610.06	928.796	950.852
ENSCPOG00000002418	1437.26	1367.62	1671.16	1627.52	1514.17	1614.42	1582.34	1582.43	1467.28	1555.83	1032.57	1461.33	1393.49	1564.13	1684.33	1432.11	1804.32	1435.81	1764.92	1669.45	1674.54	1833.78	1591.2
ENSCPOG00000002421	40.8313	45.6566	25.3074	0.945134	2.04894	7.4857	14.6598	38.2134	66.9554	19.7509	48.8625	2.04669	9.01353	4.7374	8.22515	11.6326	24.8301	53.9997	7.59513	4.97599	19.3129	5.95382	28.0516
ENSCPOG00000002424	3741.06	3324.63	3921.78	3690.75	3598.96	2980.14	4073.59	3644	3499.85	3776.91	6135.46	3100.73	4532	3339.86	3520.37	4211.02	2982.92	3355.7	3264.96	4247.01	3828.5	4359.19	3488.07
ENSCPOG00000002426	509.938	725.318	564.618	488.634	699.713	664.564	600.136	516.371	587.294	603.3	831.584	550.559	562.444	478.477	533.721	772.924	544.607	518.783	581.977	421.716	554.394	764.074	504.929
ENSCPOG00000002427	24414.4	14305.1	14768.2	12213	16151.8	8523.71	8775.72	14804.3	16496.8	19592	6481.19	11370.4	18434.5	12962.3	15223.8	9277.68	3044.17	10900.2	27518.1	21036	14412	15679.4	11188.7
ENSCPOG00000002428	300.337	390.157	393.574	466.896	362.663	363.472	485.606	454.642	416.08	417.462	295.941	599.679	450.676	530.588	453.297	373.537	497.429	333.641	494.633	455.304	381.714	386.006	385.951
ENSCPOG00000002432	73.4964	0	1.74534	12.2867	0	19.9619	10.0786	26.4555	21.0431	5.3866	54.394	62.424	5.40812	0	11.8808	1.29252	12.415	52.0712	14.2409	0	0	0.992303	15.4767
ENSCPOG00000002434	0.907363	2.0753	0.87267	0	0	0	1.83248	0	0	0	0.921933	0	0	0	0	0	0.82767	1.92856	0.949391	0	0	0	0
ENSCPOG00000002436	538.066	656.833	634.431	507.537	543.994	600.519	495.685	535.968	711.64	512.625	568.833	704.06	524.587	661.656	607.748	465.306	633.167	685.604	566.787	577.215	480.55	515.005	587.149
ENSCPOG00000002437	1024.41	1098.87	1013.17	823.211	946.611	1006.41	1131.55	937.699	1161.2	1142.86	928.387	1025.39	598.498	895.368	908.423	865.985	859.121	998.995	985.468	675.491	677.088	769.035	1081.44
ENSCPOG00000002439	584.342	54.9955	734.788	87.8974	915.877	1048.83	79.7127	21.5563	230.518	848.39	447.138	100.288	70.3055	565.329	1222.81	72.3809	534.675	138.856	433.872	77.1279	47.7142	61.5228	846.384
ENSCPOG00000002442	1255.79	2237.18	2610.16	2646.37	2213.88	2507.71	1747.27	2640.65	2295.61	2406.91	2146.26	2151.07	3075.42	3237.22	2876.06	1831.49	2972.99	2538.95	2349.74	2552.69	3008.27	2501.6	2248
ENSCPOG00000002444	7.25891	9.33886	7.85403	5.6708	9.22023	13.3079	11.9111	2.9395	9.56505	3.59107	2.7658	7.1634	19.8298	7.10609	10.9669	12.9252	20.6917	7.71425	0.949391	14.928	6.81632	15.8769	1.93459
ENSCPOG00000002449	714.095	492.884	424.99	483.908	659.759	376.78	577.23	419.368	602.598	522.5	1146.88	338.727	342.514	337.934	513.615	620.407	395.626	463.819	640.839	609.559	527.129	363.183	441.087
ENSCPOG00000002451	237.729	205.455	286.236	304.333	239.726	260.336	296.861	309.627	311.821	235.215	241.546	273.233	324.487	296.087	267.774	330.884	273.959	312.427	192.726	306.024	272.653	291.737	257.301
ENSCPOG00000002452	3.62945	16.6024	15.7081	31.1894	15.3671	9.98093	35.7333	25.4756	38.2602	9.87544	39.6431	27.6303	34.2514	14.2122	20.1059	45.238	19.0364	6.74997	11.3927	26.124	28.4013	26.7922	12.5748
ENSCPOG00000002453	3270.14	2539.13	3695.76	2861.86	4379.61	3466.71	2770.7	3510.74	1825.01	4203.35	3385.34	3028.07	3589.19	3868.87	3290.98	3105.91	2792.56	3033.63	3934.28	2821.39	2341.41	3389.71	3298.48
ENSCPOG00000002454	141.549	139.045	138.755	120.977	88.1045	118.939	169.504	141.096	172.171	125.687	190.84	188.295	178.468	135.805	161.761	124.081	171.328	141.749	144.307	134.352	153.367	124.038	147.029
ENSCPOG00000002455	1773.9	1925.88	1699.96	1484.8	1660.67	1579.48	1528.28	1823.47	1885.27	1504.66	1629.06	1698.75	1561.14	1548.34	1473.22	1879.32	1781.14	1833.1	1442.13	1857.29	1689.31	2012.39	1706.31
ENSCPOG00000002456	963.62	1174.62	1550.73	1309.01	1528.51	1314.16	1381.69	1516.78	1537.1	1402.31	1814.36	1293.51	1681.92	1478.07	1471.39	1456.66	1543.6	1571.78	1384.21	1390.79	1507.54	1354.49	1533.16
ENSCPOG00000002458	402.869	273.94	162.317	39.6956	105.52	108.127	108.116	43.1126	225.735	49.3772	371.539	35.817	34.2514	20.5287	54.8344	58.1632	55.4539	906.424	55.0647	83.3479	31.8095	21.8307	48.3648
ENSCPOG00000002459	0	0	0	0	0	0	0	0	1.91301	0	0	19.4435	3.60541	0	2.74172	0	3.31068	2.89284	12.3421	0	0	0	0
ENSCPOG00000002460	41.7387	19.7154	13.0901	2.8354	3.07341	9.14919	12.8273	0.979832	13.3911	4.48884	34.1115	0	3.60541	2.3687	10.9669	6.46258	7.44903	53.0354	14.2409	7.46399	1.13605	2.97691	6.77107
ENSCPOG00000002461	1851.93	2181.14	1689.49	1359.1	1430.16	1584.47	1418.34	1390.38	2389.35	1045.9	1723.09	1885	1099.65	1055.65	1249.31	2413.13	1357.38	1386.64	1781.06	1425.62	1523.45	1975.68	1320.36
ENSCPOG00000002465	1043.47	802.104	897.105	942.298	817.527	1068.79	1007.86	795.624	1145.89	1097.97	1335.88	940.453	1247.47	1002.75	1125.02	859.523	1034.59	1075.17	884.833	1095.96	965.645	1075.66	997.282
ENSCPOG00000002466	1140.56	1339.61	823.8	835.498	853.384	955.674	1044.51	977.872	1200.41	697.565	1110.01	866.772	776.966	802.989	702.794	1085.71	710.968	1012.49	903.82	1015.1	825.91	1034.97	890.88
ENSCPOG00000002467	792.128	704.565	987.862	861.962	812.405	876.658	602.884	978.852	651.38	772.978	580.818	971.153	867.101	784.829	767.681	903.468	871.536	833.139	857.3	885.727	911.114	900.019	959.558
ENSCPOG00000002469	198.713	169.137	81.1583	101.129	101.423	103.968	115.446	94.0639	102.346	76.3102	165.948	211.832	135.203	186.338	105.099	54.2856	126.633	196.713	103.484	87.0799	98.8366	159.761	115.108
ENSCPOG00000002472	0	0	0	1.89027	0	0	0	0	3.82602	0.897767	1.84387	0	0	0.789566	0	0	0	0	1.89878	4.97599	0	2.97691	0.967296
ENSCPOG00000002473	548.047	492.884	602.142	465.951	560.385	590.538	499.35	514.412	543.295	598.811	305.16	604.796	434.452	537.694	519.099	421.36	527.226	525.533	509.823	437.888	407.843	451.498	443.989
ENSCPOG00000002475	379.278	306.107	263.546	396.956	192.6	297.764	407.726	203.805	295.56	235.215	372.461	233.322	176.665	231.343	232.132	199.047	246.646	340.391	210.765	201.528	237.435	298.683	280.516
ENSCPOG00000002476	6.35154	22.8283	26.1801	37.8053	42.0033	3.32698	20.1572	5.87899	20.0866	8.97767	3.68773	24.5602	25.2379	3.94783	10.9669	12.9252	32.2791	49.1783	16.1397	8.70799	36.3537	28.7768	5.80378
ENSCPOG00000002477	213.23	166.024	329.869	218.326	232.555	258.672	229.976	176.37	213.301	274.717	259.985	157.595	137.006	236.87	212.026	205.51	206.917	196.713	247.791	212.724	164.728	169.684	205.067
ENSCPOG00000002479	4366.23	6355.61	3490.68	3861.82	3415.58	3944.13	3730.92	3604.8	5556.34	3268.77	3395.48	5514.8	4544.62	3600.42	4005.65	5574.62	3758.45	4071.19	3938.07	4648.82	4403.34	4890.07	4008.47
ENSCPOG00000002481	21.7767	14.5271	3.49068	5.6708	23.5628	25.7841	28.4034	44.0924	25.8256	11.671	14.7509	34.7937	52.2785	11.8435	37.4701	45.238	12.415	19.2856	23.7348	62.1999	51.1224	7.93843	21.2805
ENSCPOG00000002483	720.446	811.443	955.574	736.259	735.57	679.535	957.468	762.309	863.724	846.594	796.55	733.737	641.763	814.042	723.814	628.162	866.57	786.853	782.298	852.139	622.557	667.82	794.15
ENSCPOG00000002485	215.952	478.357	431.099	597.324	550.141	632.126	439.794	700.58	560.512	426.439	480.327	532.139	472.309	506.901	490.768	409.727	494.946	377.034	569.635	478.939	528.265	399.898	323.077
ENSCPOG00000002486	3020.61	3353.69	3480.21	3438.4	3279.33	3632.23	3409.32	3426.47	3595.5	3475.26	2812.82	3459.92	3742.42	3573.58	3683.96	3257.14	3610.29	3505.16	3957.06	3481.95	3403.61	3486.95	3684.43
ENSCPOG00000002487	469.107	571.746	500.04	650.252	512.235	501.542	286.782	853.434	428.514	556.616	302.394	700.99	694.042	636.39	525.496	453.673	758.973	583.39	502.228	541.139	815.686	539.813	509.765
ENSCPOG00000002488	0	14.5271	3.49068	0	3.07341	0	10.9949	0	5.73903	1.79553	9.21933	10.2334	0	4.7374	1.82781	0	4.96602	22.1785	1.89878	3.732	1.13605	6.94612	1.93459
ENSCPOG00000002490	201.435	74.7109	61.0869	85.062	20.4894	33.2698	109.949	43.1126	133.911	8.0799	188.074	230.252	61.292	33.1618	21.0198	46.5306	32.2791	254.57	37.0263	33.588	61.3469	27.7845	24.1824
ENSCPOG00000002491	891.938	1097.83	1126.62	1176.69	1380.99	1182.74	936.395	1390.38	861.811	1415.78	1287.94	786.951	1580.97	1422.8	1472.3	1049.52	1546.91	1213.07	1125.98	964.099	1221.26	1129.24	1100.78
ENSCPOG00000002494	583.435	797.954	508.767	619.063	542.969	539.802	502.098	589.859	486.861	536.865	442.528	552.605	539.009	581.91	641.562	555.782	506.534	549.64	430.074	424.204	521.448	566.605	507.83
ENSCPOG00000002495	155.159	174.325	103.848	142.715	93.2268	107.295	182.331	149.914	130.085	157.109	200.981	106.428	137.006	86.8523	98.7019	196.462	114.218	151.392	131.016	134.352	154.503	184.568	91.8931
ENSCPOG00000002498	661.468	899.644	1197.3	1235.29	868.751	1181.91	866.761	1107.21	852.246	1167.1	763.361	996.737	1153.73	1215.93	1200.87	815.577	1203.43	848.567	1069.96	772.523	946.332	580.497	877.337
ENSCPOG00000002499	771.259	166.024	20.9441	102.074	77.8598	10.8127	49.4768	90.1445	164.519	219.953	959.732	233.322	14.4216	7.10609	28.3311	0	13.2427	803.246	29.4311	16.172	14.7687	2.97691	7.73837
ENSCPOG00000002500	834.774	1402.9	1719.16	1634.14	1200.68	1668.48	1230.51	1511.88	1457.71	1183.26	1617.07	1510.46	1836.96	1432.27	1619.44	1592.38	1637.13	1218.85	1519.03	1477.87	1873.35	1347.55	1559.28
ENSCPOG00000002503	0	0	3.49068	3.78053	0	0	0.916238	2.9395	0	0.897767	0	10.2334	1.80271	0	2.74172	0	2.48301	4.8214	3.79756	1.244	0	0	6.77107
ENSCPOG00000002505	1185.02	809.368	1680.76	1483.86	1561.29	1379.03	1469.65	2269.29	1500.76	1369.09	925.621	1269.97	1231.25	1572.82	1423.87	1220.13	1556.02	1611.31	1353.83	1404.47	1282.6	1050.85	1449.98
ENSCPOG00000002509	236.822	401.571	298.453	310.949	257.142	214.59	213.483	340.982	278.343	316.014	234.171	229.229	212.719	363.99	297.019	187.415	309.548	251.677	1094.65	352.052	265.836	324.483	281.483
ENSCPOG00000002512	1387.36	1366.59	1301.15	1520.72	1296.98	1229.32	1617.16	1302.2	1373.54	1649.2	2255.05	1200.38	1447.57	1237.25	1305.97	1463.13	1442.63	1521.64	1304.46	1367.15	1175.81	1705.77	1313.59
ENSCPOG00000002513	188.732	306.107	251.329	342.138	430.278	294.437	226.311	388.013	265.908	280.103	204.669	250.719	266.8	310.299	244.013	289.523	294.65	261.32	228.803	266.216	403.299	271.891	294.058
ENSCPOG00000002514	43.5534	56.0332	12.2174	20.7929	26.6362	12.4762	48.5606	29.395	22.9561	19.7509	70.9888	18.4202	10.8162	22.8974	25.5894	67.2108	21.5194	29.8927	17.089	39.808	31.8095	27.7845	29.9862
ENSCPOG00000002517	429.183	662.021	535.819	547.232	557.312	556.437	472.779	705.479	346.255	631.13	546.706	448.224	791.388	844.046	771.337	442.04	670.412	478.283	587.673	547.359	637.326	534.852	642.285
ENSCPOG00000002522	1592.42	1356.21	476.478	307.168	1112.57	950.684	1810.49	706.459	1342.93	582.651	1180.07	1033.58	1227.64	908.79	710.105	646.258	559.505	950.781	1122.18	1907.05	795.237	1075.66	975.034
ENSCPOG00000002523	264.043	226.208	297.58	195.643	244.848	243.701	226.311	262.595	306.082	272.921	201.903	286.536	214.522	226.605	212.94	268.843	124.978	235.285	223.107	232.628	137.462	215.33	358.867
ENSCPOG00000002524	67268.3	103572	102567	163802	109412	118717	134320	142282	69985.6	100282	113767	135391	154385	161113	122449	117671	129539	126738	188040	141001	157071	156465	145419
ENSCPOG00000002525	2490.71	2228.87	2678.22	2309.91	2375.75	2432.85	2745.96	2400.59	2414.22	2862.98	3337.4	2188.93	4261.6	2460.29	2467.55	3747	2239.67	2533.17	2374.43	3699.65	3154.82	3703.28	2638.78
ENSCPOG00000002526	41.7387	0	12.2174	2.8354	5.12235	3.32698	12.8273	13.7176	0.956505	2.6933	0	0	1.80271	2.3687	3.65562	10.3401	2.48301	10.6071	4.74696	9.95199	5.68026	0	4.83648
ENSCPOG00000002529	2208.52	2004.74	2322.17	2220.12	2411.6	2217.43	2373.97	2074.3	1753.27	2451.8	2306.68	2370.06	1797.3	2371.07	2156.82	1900	2156.08	2292.1	2600.38	1849.83	1690.45	2312.07	2331.18
ENSCPOG00000002531	365.667	287.429	385.72	309.059	300.17	327.707	328.929	392.913	442.862	269.33	589.115	405.244	411.017	296.087	345.456	431.7	238.369	311.463	260.133	426.692	287.421	475.313	325.979
ENSCPOG00000002533	0	0	0	0	0	3.32698	0	0	0	0	7.37546	1.02334	0	0	0	2.58503	0.82767	0	0	0	2.27211	1.98461	0
ENSCPOG00000002534	1491.71	1747.4	2251.49	2213.5	2008.99	2357.16	2017.56	2466.24	1649.02	2448.21	2108.46	2010.87	2417.43	2679.79	2617.43	1551.02	2468.11	1904.45	2015.56	2211.83	2435.7	2137.42	2095.16
ENSCPOG00000002536	1136.02	927.66	1014.92	891.261	1327.71	1134.5	1222.26	1221.85	1068.42	1048.59	1387.51	903.612	1357.44	1183.56	1018.09	1368.77	869.881	1069.39	853.503	1204.19	1270.11	1192.75	1159.79
ENSCPOG00000002537	239.544	38.3931	15.7081	43.4761	9.22023	5.82221	106.284	82.3059	196.084	70.0258	473.874	97.2176	10.8162	0	5.48344	6.46258	14.0704	277.713	5.69635	17.416	37.4897	2.97691	18.3786
ENSCPOG00000002538	636.969	920.397	715.589	788.241	723.276	871.668	615.712	798.563	785.291	726.294	623.227	897.472	701.252	1005.91	841.707	588.095	706.83	778.175	732.93	665.539	821.366	742.243	614.233
ENSCPOG00000002539	872.883	941.15	825.546	831.718	923.048	703.656	785.216	872.05	749.9	856.47	645.353	1176.85	710.266	924.582	777.734	810.407	986.582	995.138	802.236	656.831	867.944	847.427	1001.15
ENSCPOG00000002541	3686.62	9525.64	5973.43	8214.16	8049.26	8801.52	4342.97	9458.32	6090.07	6584.22	5254.1	8764.94	8820.64	8799.71	7762.72	7695.64	6166.97	5731.69	6013.44	7247.54	9075.93	6311.05	6405.43
ENSCPOG00000002542	4122.15	3820.63	3988.97	3958.22	2655.43	3714.57	5042.97	2632.81	2661	4186.29	4358.9	3596.03	3084.43	2717.69	3999.25	5060.2	2581.5	2741.45	3331.41	5080.49	4324.95	3446.27	4193.23
ENSCPOG00000002544	1425.47	1911.35	1440.78	1309.96	1495.73	1350.75	1389.93	1443.29	1782.93	1260.47	1700.97	1608.7	1395.29	1306.73	1299.57	2179.18	1291.16	1372.17	1530.42	1597.29	1540.49	1761.34	1575.73
ENSCPOG00000002545	1114.24	1134.15	1374.46	1223.95	1321.57	1163.61	1348.7	1146.4	1143.98	1242.51	1641.96	1050.97	1617.03	1131.45	1211.84	1297.69	1335.86	1233.32	1270.29	1392.03	1157.64	1542.04	1268.13
ENSCPOG00000002546	354.779	343.463	282.745	297.717	335.002	288.615	362.83	272.393	326.168	312.423	393.665	281.419	310.065	326.88	308.9	358.027	254.095	323.998	306.653	398.08	388.53	461.421	332.75
ENSCPOG00000002548	446.423	292.618	347.323	307.168	430.278	321.885	410.474	339.022	408.428	315.116	280.268	342.82	164.046	375.833	343.629	175.782	326.929	373.177	354.123	258.752	154.503	216.322	435.283
ENSCPOG00000002549	2426.29	2195.67	2770.73	2170.03	2126.8	2306.43	2194.39	2102.72	2228.66	2182.47	1969.25	2326.06	1815.32	2338.69	2321.32	1825.03	2192.5	2392.38	2543.42	1877.19	1629.1	1933.01	2262.51
ENSCPOG00000002552	17.2399	1.03765	0.87267	0	1.02447	0	0	3.91933	3.82602	0	8.2974	0	0	1.57913	0	0	3.31068	9.64281	0	1.244	2.27211	4.96152	5.80378
ENSCPOG00000002553	389.259	430.625	397.938	457.445	269.436	689.516	411.391	418.388	464.862	426.439	378.914	373.52	416.425	455.58	397.549	392.925	446.114	442.605	411.086	442.864	504.407	374.098	462.367
ENSCPOG00000002554	87.1069	47.732	0	20.7929	18.4405	0	3.66495	6.85882	0	31.4219	8.2974	7.1634	0	0	0	0	4.13835	84.8567	0	0	0	0	0
ENSCPOG00000002555	47.1829	95.4639	25.3074	65.2142	72.7374	45.7459	21.9897	68.5882	28.6952	34.1152	47.9405	25.5836	95.5434	108.96	35.6423	51.7006	50.4878	66.5354	36.0769	54.7359	46.5782	41.6767	43.5283
ENSCPOG00000002556	1165.05	795.878	1077.75	881.81	1005.01	1172.76	1247	1059.2	1159.28	939.064	1041.78	1010.04	867.101	969.587	1010.78	968.094	961.752	986.459	1219.02	945.439	887.257	1087.56	1024.37
ENSCPOG00000002558	564.38	636.08	582.944	530.22	466.134	617.986	526.837	520.291	418.949	613.175	767.048	515.765	744.517	564.54	580.33	611.36	653.031	539.997	510.772	724.007	785.013	580.497	600.691
ENSCPOG00000002559	2056.08	1659.2	2650.3	2501.77	2955.6	2936.89	1826.98	2576.96	1850.84	2637.64	1601.4	2723.12	3210.62	2871.65	3081.69	2272.24	2737.1	2113.7	2489.3	2838.81	2868.53	2267.41	2386.32
ENSCPOG00000002561	20.8694	31.1295	17.4534	22.6832	10.2447	36.5967	12.8273	12.7378	13.3911	11.671	7.37546	27.6303	21.6325	13.4226	22.8477	32.3129	13.2427	9.64281	14.2409	16.172	19.3129	21.8307	27.0843
ENSCPOG00000002562	587.064	735.695	501.785	624.733	791.916	682.862	351.835	558.504	643.728	608.686	490.468	962.966	674.212	750.088	708.277	690.203	720.073	701.996	905.719	639.415	890.665	731.328	734.178
ENSCPOG00000002566	532.622	406.759	360.413	358.206	403.641	439.161	458.119	457.582	283.126	262.148	351.256	440.038	185.679	463.475	566.622	217.143	422.939	492.748	412.985	460.28	326.047	287.768	532.98
ENSCPOG00000002568	1066.15	350.726	61.9596	152.167	123.961	26.6158	34.817	74.4672	135.824	298.956	990.156	156.572	41.4622	45.0053	67.629	50.4081	106.769	1004.78	37.9756	46.028	56.8026	91.2919	29.9862
ENSCPOG00000002570	1067.06	1364.51	1695.6	1717.31	1738.53	1539.56	1785.75	1577.53	1393.63	1834.14	1087.88	1952.54	1754.03	1599.66	1448.54	1149.05	1501.39	1197.64	1433.58	1476.63	1532.54	1571.81	1558.31
ENSCPOG00000002571	1175.94	1032.46	1095.2	1350.6	1377.91	1172.76	1314.8	1214.99	1058.85	1435.53	1684.37	905.659	1420.53	1233.3	1123.19	1308.03	1026.31	1050.1	1126.93	1302.47	1179.22	1519.22	1105.62
ENSCPOG00000002575	4.53682	0	0	0	0	0	0	0	14.3476	3.59107	0	10.2334	0	0	0	0	0.82767	28.9284	2.84817	0	0	0	0
ENSCPOG00000002576	2404.51	1832.49	2237.53	2124.66	2334.77	2098.49	2496.75	1990.04	1633.71	2922.23	3698.8	1472.59	3140.31	2041.82	2059.03	2958.57	1777.01	2094.42	1874.1	3086.36	2502.72	2876.69	2276.05
ENSCPOG00000002580	383.815	559.294	324.633	222.106	280.705	326.875	279.453	326.284	275.474	344.743	235.093	349.983	351.528	283.454	332.662	429.115	384.866	392.462	525.013	465.256	421.476	395.929	434.316
ENSCPOG00000002583	234.1	169.137	95.9937	124.758	130.108	135.574	240.971	116.6	165.475	154.416	138.29	170.898	111.768	145.28	284.225	274.013	258.233	161.999	150.004	111.96	115.877	149.838	135.421
ENSCPOG00000002586	135.197	221.02	159.699	179.575	196.698	215.422	185.996	190.087	180.78	149.927	101.413	122.801	155.033	180.811	215.682	152.517	163.879	131.142	166.143	150.524	152.231	174.645	149.931
ENSCPOG00000002587	150.622	609.101	617.85	675.771	543.994	643.77	284.034	556.545	439.036	619.459	348.491	679.5	840.061	755.615	728.383	367.074	775.526	612.318	598.116	543.627	889.529	546.759	616.168
ENSCPOG00000002588	2189.47	1523.27	2157.24	2176.64	2286.62	2436.18	2210.88	2187.96	1702.58	2693.3	2231.08	2411	2202.91	2769.01	2195.2	1982.72	2050.14	2165.77	2565.26	1908.29	1818.82	2380.54	2234.45
ENSCPOG00000002589	2795.59	2708.27	3277.75	2606.68	3198.4	3115.71	3876.6	3306.93	3339.16	2991.36	2701.26	3107.89	2943.82	3095.89	3116.42	3209.32	3069	2672.02	3415.91	3267.98	2323.23	3135.68	2970.57
ENSCPOG00000002591	70.7743	23.866	23.5621	33.0797	10.2447	26.6158	14.6598	25.4756	15.3041	4.48884	28.5799	21.4902	41.4622	7.89566	14.6225	16.8027	22.3471	10.6071	24.6842	14.928	15.9047	23.8153	6.77107
ENSCPOG00000002594	166.955	318.559	287.981	449.884	149.573	287.783	162.174	301.788	87.9985	159.803	210.201	292.676	365.949	221.078	371.96	221.02	296.306	268.07	150.953	277.412	306.734	233.191	204.099
ENSCPOG00000002599	604.304	815.594	443.316	381.834	386.225	486.57	447.124	361.558	507.904	425.542	345.725	305.98	400.201	400.31	428.622	403.265	471.772	500.462	473.746	485.159	481.686	424.706	440.12
ENSCPOG00000002601	2017.98	1499.41	1582.15	1519.77	1365.62	1432.26	1855.38	1478.57	1597.36	1631.24	1376.45	1319.09	944.618	1278.31	1342.53	1331.29	1272.96	1703.88	1602.57	1221.61	887.257	1339.61	1727.59
ENSCPOG00000002606	30.8503	0	0	0	0	0	7.3299	0	8.60855	0	13.829	0	9.01353	0	0	0	0	0	0	2.488	0	0	0
ENSCPOG00000002607	225.933	582.122	464.26	432.871	608.535	585.548	354.584	497.755	301.299	542.251	285.799	598.656	447.071	690.87	524.582	343.809	554.539	443.569	430.074	413.008	579.387	437.606	415.937
ENSCPOG00000002611	379.278	548.917	767.077	812.815	580.875	836.735	406.81	831.877	596.859	774.773	760.595	654.94	989.685	739.823	785.045	1005.58	958.441	838.924	600.015	919.315	1103.11	641.028	631.644
ENSCPOG00000002613	862.902	738.808	902.341	854.401	714.056	739.421	776.053	846.575	632.25	974.077	637.978	529.069	859.89	861.416	1050.08	603.605	859.121	982.602	835.464	714.055	710.033	723.389	641.317
ENSCPOG00000002614	78.9406	68.485	36.6521	43.4761	14.3426	45.7459	40.3145	50.9513	36.3472	34.1152	29.5019	38.8871	10.8162	30.0035	52.0926	33.6054	33.9345	56.8926	29.4311	39.808	26.1292	14.8846	34.8227
ENSCPOG00000002615	206.879	116.217	21.8168	18.9027	31.7586	14.1397	57.723	49.9714	53.5643	26.933	186.23	81.8675	1.80271	14.2122	10.9669	41.3605	34.7621	161.999	27.5323	24.88	9.08842	11.9076	11.6076
ENSCPOG00000002617	3.62945	11.4142	2.61801	6.61594	0	3.32698	5.49743	0	0	0	17.5167	9.21009	0	4.7374	10.053	1.29252	6.62136	10.6071	6.64574	1.244	5.68026	4.96152	11.6076
ENSCPOG00000002618	8.16627	2.0753	0	0	0	0	2.74871	4.89916	6.69554	0	0	16.3735	3.60541	0	0.913906	0	0	17.3571	0	4.97599	0	0.992303	0
ENSCPOG00000002625	2355.51	1825.23	1746.21	1637.92	1138.19	988.112	1650.14	1906.75	1452.93	1406.8	2828.49	2300.48	1741.41	1579.13	1780.29	1810.81	1650.37	2051.99	2048.79	2492.97	2101.7	1399.15	1961.68
ENSCPOG00000002627	12.7031	1.03765	0	0	4.09788	0.831744	2.74871	1.95966	3.82602	0	26.7361	8.18675	0	0	0.913906	0	0	5.78569	0	0	0	0	0
ENSCPOG00000002628	4467.86	4292.76	4849.43	5258.72	5239.14	4948.05	4712.21	4554.26	3737.07	5254.63	3985.52	4809.71	6570.86	5525.38	4823.6	5136.46	5040.51	4849.37	5359.31	6038.37	5749.56	6185.03	4791.98
ENSCPOG00000002629	5037.68	4892.53	6661.09	6482.67	6172.43	6959.2	6509.87	7234.1	6025.03	6788.92	3566.04	6875.85	8557.44	7853.81	6978.59	6882.64	6666.88	7000.68	7018.85	7735.18	7844.45	5907.18	6190.69
ENSCPOG00000002630	0	68.485	32.2888	30.2443	47.1256	21.6253	31.1521	17.637	32.5212	15.262	0	3.07003	43.2649	28.4244	23.7616	16.8027	27.3131	17.3571	21.836	9.95199	46.5782	15.8769	45.4629
ENSCPOG00000002632	37622	27578.7	26907.9	29204.6	28543.8	24378.4	37656.5	29413.6	31252.9	30078.8	45939	24185.7	25286.5	24924.2	25937.6	32203	23034	32042.1	25811.1	26219.8	23272	27022.4	29977.5
ENSCPOG00000002635	19.962	43.5813	41.0155	51.9824	24.5873	24.1206	32.0683	37.2336	26.7821	40.3995	40.5651	32.747	9.01353	54.4801	30.1589	40.068	15.7257	31.8213	28.4817	26.124	38.6258	18.8538	64.8088
ENSCPOG00000002636	590.693	1122.74	843.872	910.164	1032.67	1247.62	687.178	1077.82	868.507	1132.08	877.68	905.659	1404.31	1296.47	1189.91	965.509	1096.66	831.21	994.013	910.607	1182.63	890.096	976.002
ENSCPOG00000002637	883.772	1122.74	1595.24	1678.56	1409.67	1492.15	1290.06	1763.7	1017.72	1608.8	1442.83	1217.78	2132.6	1801.79	1737.34	1348.09	2063.38	1415.56	1725.04	1496.53	1842.68	1384.26	1461.58
ENSCPOG00000002639	342.983	318.559	222.531	291.101	299.145	217.085	223.562	204.785	264.952	337.56	387.212	243.556	326.29	281.875	278.741	277.891	320.308	339.427	241.145	210.236	288.557	341.352	330.815
ENSCPOG00000002642	1803.84	1249.33	1558.59	1504.65	1724.18	1433.93	1761.01	1379.6	1415.63	1529.8	1580.19	1532.97	968.053	1339.1	1388.22	1441.15	1546.91	1345.17	1714.6	1302.47	1006.54	1606.54	1625.06
ENSCPOG00000002648	3120.42	4191.07	4567.55	5110.34	4828.33	5169.29	3545.84	4760.02	3811.67	5181.01	4496.27	4952.98	6120.18	5489.06	4597.86	4558.7	4774.83	4238.98	4405.18	4760.78	5114.51	4871.22	4488.25
ENSCPOG00000002649	1451.78	1178.77	1681.64	1393.13	1765.16	1605.27	1597.92	1816.61	1383.11	1836.83	1692.67	1519.67	1919.88	1928.91	1496.98	1567.82	1350.76	1364.46	1642.45	1821.21	1541.62	1448.76	1587.33
ENSCPOG00000002650	599.767	654.758	625.704	515.098	555.263	519.008	508.512	627.092	596.859	689.485	586.349	544.419	656.185	516.376	703.708	593.265	614.958	612.318	653.181	620.755	643.006	549.736	579.41
ENSCPOG00000002651	309.411	353.839	476.478	516.988	297.096	331.034	525.004	626.113	563.382	455.168	672.089	724.527	542.614	528.22	449.642	484.693	498.257	433.926	508.874	765.059	822.502	620.19	460.433
ENSCPOG00000002653	351.15	309.22	291.472	251.406	302.219	271.98	431.548	350.78	368.255	222.646	459.123	200.575	405.609	286.612	286.053	405.85	196.158	356.784	318.046	307.268	299.918	366.16	295.993
ENSCPOG00000002654	1831.06	2610.73	2854.5	2961.1	3046.78	3033.37	2050.54	2707.28	2332.92	2989.56	2158.25	3228.65	4508.57	3144.05	3146.58	2519.11	3472.07	2631.52	2914.63	2881.1	3470.64	2956.07	2405.67
ENSCPOG00000002655	535.344	542.692	544.546	545.342	507.113	470.767	568.984	466.4	476.34	537.763	484.937	523.952	549.825	433.472	485.284	700.543	513.983	477.319	473.746	513.771	482.822	565.613	467.204
ENSCPOG00000002656	123.401	69.5226	68.9409	38.7505	98.3492	30.7745	67.8016	53.8908	110.955	67.3325	64.5353	60.3773	66.7001	55.2696	76.7681	69.7958	76.1456	75.2139	64.5586	63.4439	65.8911	87.3227	54.1686
ENSCPOG00000002659	264.95	384.969	292.344	349.699	249.971	378.444	210.735	364.498	307.038	343.845	217.576	450.271	609.314	307.141	286.053	367.074	329.412	275.784	232.601	333.392	454.421	267.922	280.516
ENSCPOG00000002660	54.4418	58.1085	25.3074	6.61594	0	4.99046	9.16238	37.2336	21.9996	10.7732	88.5056	0	19.8298	7.10609	16.4503	16.8027	44.6942	39.5355	16.1397	9.95199	19.3129	21.8307	18.3786
ENSCPOG00000002661	173.306	491.847	298.453	386.56	309.39	306.082	215.316	434.066	285.995	324.094	193.606	429.804	400.201	369.517	413.086	390.34	362.519	196.713	281.969	293.584	424.884	252.045	323.077
ENSCPOG00000002663	375.648	475.244	335.105	322.291	352.418	425.021	546.994	452.682	336.69	440.804	297.784	440.038	349.725	480.056	372.874	411.02	463.495	434.891	463.303	375.688	363.537	374.098	525.242
ENSCPOG00000002666	0	13.4895	0	0	0	0	0	0	0	0	0	21.4902	10.8162	0	0	3.87755	1.65534	0.964281	0	1.244	12.4966	0	7.73837
ENSCPOG00000002667	8482.03	8923.8	10823.7	9799.15	9208.97	10177.2	10526.7	9364.25	9875.92	9775.79	7514.68	10816.7	11699.6	11143.1	10699.1	10806.7	9927.9	10044.9	10587.6	12264.6	11082.2	8993.25	9795.81
ENSCPOG00000002671	325.743	326.86	246.093	199.423	237.677	271.149	232.724	232.22	244.865	272.023	205.591	319.283	196.495	248.713	247.669	305.034	234.23	303.748	225.955	293.584	238.571	358.222	313.404
ENSCPOG00000002672	11084.3	10431.5	12037.6	15534.2	14531.1	16145.8	13504.4	14107.6	9661.66	13778.9	7001.16	14603.1	12478.3	20787.7	17738	10297.5	15474.9	16657	16695	15712.9	13573.6	11517.7	14698.1
ENSCPOG00000002673	1251.25	1202.64	1180.72	957.42	1174.04	1058.81	902.494	806.402	1010.07	1133.88	1098.02	945.569	917.577	917.476	962.343	789.727	1053.62	1126.28	932.302	932.999	931.563	975.434	929.571
ENSCPOG00000002674	2205.8	1972.57	2369.3	2155.85	2319.4	1887.23	2520.57	2191.88	2182.75	2454.5	2411.78	2194.05	2453.48	1973.13	2085.53	2749.18	2146.97	2290.17	1968.09	2455.65	2292.55	2589.91	2350.53
ENSCPOG00000002675	1104.26	897.568	903.213	826.992	890.265	680.367	1217.68	988.65	972.766	901.358	1364.46	871.889	794.993	805.357	854.502	912.516	865.742	973.924	940.847	971.563	831.591	1042.91	1059.19
ENSCPOG00000002678	712.28	878.89	987.862	761.778	781.671	902.442	775.137	968.074	773.813	803.502	882.29	902.589	996.896	941.163	766.767	739.319	799.529	653.782	691.157	834.723	785.013	813.689	948.917
ENSCPOG00000002680	602.489	936.999	652.757	894.096	775.524	958.169	990.453	907.324	661.902	816.968	699.747	1327.28	782.374	1144.08	861.813	738.026	811.944	924.745	795.59	990.223	1039.49	1108.4	878.305
ENSCPOG00000002681	803.924	640.231	534.947	602.05	636.196	552.278	774.221	740.753	729.814	586.242	1125.68	572.049	647.171	577.962	518.185	1030.13	528.881	591.104	569.635	745.155	712.305	705.528	650.99
ENSCPOG00000002682	219.582	312.333	342.087	327.016	324.757	321.053	262.044	365.477	329.038	323.196	436.074	358.17	459.69	382.15	365.562	308.911	339.345	317.248	357.92	292.34	357.857	318.529	398.526
ENSCPOG00000002683	142.456	343.463	314.161	414.914	353.442	415.872	229.976	460.521	218.083	517.114	326.364	373.52	528.193	557.434	512.701	307.619	434.527	363.534	393.048	298.56	514.632	293.722	381.115
ENSCPOG00000002685	1318.4	1576.19	1276.72	1149.28	1359.47	979.795	1290.98	1208.13	1561.02	1258.67	2227.39	1246.43	939.21	1081.71	1205.44	1103.81	1033.76	1268.03	1285.48	1049.93	791.829	1046.88	1377.43
ENSCPOG00000002686	5.44418	40.4684	27.0528	11.3416	27.6607	3.32698	5.49743	6.85882	0	8.97767	0	77.7741	97.3461	39.4783	108.755	12.9252	16.5534	32.7855	21.836	79.6159	60.2108	16.8692	9.67296
ENSCPOG00000002687	1090.65	817.669	988.735	1166.29	1049.06	845.052	1182.86	1272.8	1086.59	1081.81	1320.21	696.897	1456.59	951.427	1061.04	1382.99	1066.87	1071.32	1134.52	1525.14	1284.88	1409.07	1142.38
ENSCPOG00000002689	5225.5	3268.6	3310.04	2959.21	3749.56	4373.31	4584.85	4246.59	4860	3572.22	3563.27	3791.49	2846.47	2915.87	3094.49	3034.83	3880.11	3410.66	4968.16	3234.4	2402.75	3466.12	3678.63
ENSCPOG00000002690	362.038	73.6732	90.7577	44.4213	177.233	51.5681	163.09	79.3664	197.04	56.5593	125.383	63.4473	28.8433	90.8001	125.205	74.9659	67.8689	126.321	69.3056	63.4439	13.6326	31.7537	152.833
ENSCPOG00000002692	275.838	161.874	192.86	290.156	132.157	161.358	189.661	351.76	275.474	252.273	179.777	224.112	329.895	284.244	329.006	248.163	111.735	171.642	131.965	366.98	447.605	329.445	302.764
ENSCPOG00000002693	108.884	79.8991	47.9969	55.7629	69.664	78.184	111.781	37.2336	59.3033	43.0928	42.4089	96.1943	32.4487	95.5375	45.6953	20.6802	46.3495	66.5354	63.6092	65.9319	24.9932	35.7229	81.2529
ENSCPOG00000002694	16.3325	13.4895	20.9441	32.1345	14.3426	15.8031	18.3248	10.7782	24.8691	8.0799	26.7361	5.11672	28.8433	13.4226	21.0198	37.4829	21.5194	19.2856	10.4433	31.1	30.6734	32.746	19.3459
ENSCPOG00000002695	56.2565	83.0121	38.3975	16.0673	9.22023	44.9142	44.8956	26.4555	42.0862	35.9107	78.3643	37.8637	45.0676	14.2122	30.1589	32.3129	33.1068	45.3212	36.0769	28.612	43.17	26.7922	18.3786
ENSCPOG00000002696	1639.61	2303.59	2206.11	2057.56	1944.44	2184.16	2158.66	2719.03	2400.83	1705.76	1275.96	2943.14	2246.17	2295.27	2186.06	2141.7	2041.86	1972.92	2424.75	2270.3	2256.2	2370.61	2194.79
ENSCPOG00000002697	1663.2	759.561	1266.24	1118.09	1387.13	1363.23	1494.38	1089.57	1239.63	1216.47	1028.88	1284.3	591.287	1159.87	1361.72	778.094	1269.65	1348.06	1305.41	737.691	673.679	792.85	1390.97
ENSCPOG00000002700	8.16627	18.6777	2.61801	10.3965	25.6118	0.831744	11.9111	20.5765	14.3476	10.7732	35.0335	12.2801	37.8568	35.5305	19.192	5.17006	30.6238	2.89284	7.59513	17.416	12.4966	30.7614	11.6076
ENSCPOG00000002701	54.4418	19.7154	20.0714	5.6708	9.22023	9.98093	12.8273	2.9395	4.78253	8.0799	34.1115	21.4902	9.01353	10.2644	11.8808	5.17006	12.415	21.2142	9.49391	1.244	4.54421	7.93843	21.2805
ENSCPOG00000002702	1669.55	1396.68	1507.1	1243.8	1696.52	1277.56	1489.8	1315.91	1354.41	1358.32	1271.35	1415.28	978.869	1384.11	1376.34	1074.08	1416.14	1368.31	1583.58	1100.94	921.339	1013.14	1596.04
ENSCPOG00000002706	3081.41	2836.94	3885.13	3856.15	3742.39	3753.66	3482.62	4040.83	4159.84	3846.03	2553.75	3015.79	4510.37	4731.87	4535.72	3233.87	4380.86	3588.09	4429.86	4395.05	4396.52	3635.8	3714.42
ENSCPOG00000002710	802.109	1352.06	815.074	809.98	973.247	823.427	847.52	820.119	1131.55	623.05	738.468	1098.05	780.571	715.347	810.635	1326.12	780.492	820.603	974.075	991.467	928.155	1099.47	898.618
ENSCPOG00000002711	87.1069	375.63	316.779	319.455	294.023	412.545	294.112	471.299	286.952	315.116	356.788	431.851	551.628	571.646	369.218	271.428	172.155	350.034	343.68	424.204	415.795	454.475	302.764
ENSCPOG00000002714	27.2209	39.4307	78.5403	77.501	78.8842	113.949	43.9794	109.741	93.7375	62.8437	49.7844	123.825	108.162	75.7983	111.497	65.9183	95.182	103.178	63.6092	49.7599	94.2924	55.569	89.9585
ENSCPOG00000002720	5155.64	1032.46	6535.43	1054.77	2879.79	2466.95	2712.06	1749.98	4912.61	4127.04	1213.26	671.313	639.96	1072.23	1818.67	1127.07	1125.63	1328.78	2316.51	2079.97	330.591	869.258	1915.25
ENSCPOG00000002723	3339.1	3701.3	3722.81	3452.57	3426.85	3247.96	3409.32	2984.57	3320.03	4457.41	5139.78	2887.88	4211.12	3693.59	3361.35	3186.05	3827.14	3626.66	3165.27	3587.69	3567.21	3119.8	3152.42
ENSCPOG00000002724	372.019	788.615	906.704	737.204	828.797	758.551	532.334	819.14	1046.42	803.502	653.651	1204.48	959.039	739.823	839.88	753.536	802.839	832.174	809.831	801.135	927.019	838.496	762.229
ENSCPOG00000002726	1238.55	1370.74	1274.1	1274.04	1178.14	961.496	1321.21	1436.43	1590.67	1242.51	1362.62	1497.15	1169.96	1253.83	1600.25	1362.31	1411.18	1484.99	1330.1	1604.76	1457.56	1130.23	1298.11
ENSCPOG00000002727	28.1283	15.5648	3.49068	0	18.4405	1.66349	0	0	0	4.48884	5.5316	0	0	3.15826	7.31125	1.29252	4.13835	0	29.4311	0	0	0	4.83648
ENSCPOG00000002728	303.059	309.22	287.108	329.852	331.928	321.053	340.84	335.103	248.691	406.689	353.1	287.56	506.56	307.931	337.231	418.775	316.997	360.641	271.526	385.64	420.34	379.06	285.352
ENSCPOG00000002729	24.4988	35.2801	33.1615	10.3965	14.3426	19.1301	33.9008	20.5765	33.4777	27.8308	30.4238	12.2801	9.01353	26.0557	15.5364	46.5306	28.1408	19.2856	16.1397	26.124	26.1292	43.6613	14.5094
ENSCPOG00000002730	448.237	668.247	388.338	355.37	255.093	355.987	295.029	342.941	329.994	351.027	441.606	756.251	230.746	450.842	371.96	257.211	445.286	277.713	563.938	264.972	215.85	464.398	425.61
ENSCPOG00000002732	0	59.1461	35.7795	41.5859	3.07341	14.9714	21.9897	48.0118	67.9119	13.4665	61.7695	18.4202	64.8974	16.5809	78.5959	73.6734	29.7961	24.107	17.089	14.928	59.0748	43.6613	48.3648
ENSCPOG00000002733	5322.59	3268.6	3691.39	2936.53	3382.8	2339.7	4146.89	3212.87	3652.89	3932.22	6088.45	2502.07	2895.14	2516.35	2833.11	3911.15	2724.69	3716.34	2912.73	3151.05	2567.48	3409.55	3560.62
ENSCPOG00000002734	732.242	1048.03	845.617	934.737	630.049	959.001	916.238	1080.75	1075.11	773.875	1428.07	1101.12	962.645	1171.72	1178.94	823.332	1185.22	1378.92	1088	992.711	969.053	1028.03	721.603
ENSCPOG00000002735	263.135	195.078	175.407	216.436	324.757	281.961	374.741	182.249	392.167	222.646	342.959	162.712	216.325	193.444	331.748	306.326	241.68	320.141	300.957	318.464	339.68	220.291	220.543
ENSCPOG00000002737	56.2565	50.8449	52.3602	54.8178	92.2023	39.9237	87.0426	58.7899	58.3468	51.1727	39.6431	66.5173	14.4216	30.7931	55.7483	43.9455	43.8665	41.4641	24.6842	74.6399	105.653	56.5613	59.9724
ENSCPOG00000002738	378.37	825.97	445.062	534.001	314.512	418.367	385.736	763.289	568.164	447.088	319.911	561.816	447.071	494.268	495.337	418.775	424.594	327.855	599.066	379.42	525.992	348.298	412.068
ENSCPOG00000002739	4395.27	3808.18	4548.36	4410.94	4917.46	5324.83	3756.57	4925.62	3467.33	5107.4	2297.46	4849.62	4795.2	5647.77	4993.58	3109.79	4516.59	4269.84	5100.13	4070.36	4259.06	3931.51	4681.71
ENSCPOG00000002741	712.28	393.27	629.195	489.579	718.154	553.942	552.491	586.919	459.123	456.066	404.729	419.571	360.541	711.399	647.959	281.768	364.175	479.248	588.623	405.544	385.122	464.398	494.288
ENSCPOG00000002742	578.898	373.554	430.226	336.468	342.173	281.13	592.806	338.042	533.73	435.417	898.885	329.517	284.827	217.131	282.397	408.435	276.442	444.533	261.083	308.512	356.721	323.491	399.493
ENSCPOG00000002743	40.8313	8.30121	24.4348	4.72567	10.2447	15.8031	10.9949	4.89916	31.5647	8.0799	21.2045	0	9.01353	6.31653	6.39734	15.5102	18.2087	25.0713	14.2409	18.66	11.3605	1.98461	0.967296
ENSCPOG00000002744	362.945	675.511	493.931	505.647	483.55	523.167	538.748	528.129	647.554	507.238	655.494	653.916	481.322	491.9	488.94	493.741	509.017	575.676	446.214	600.851	473.734	421.729	429.479
ENSCPOG00000002749	25948.8	37816.2	35633.7	45171.7	27239.6	22419.7	33614.9	59880.5	40736.6	29377.6	31998.5	44528.7	40121	36635.1	35547.3	39772	28155.7	37099.7	35348.7	43270	40705.9	30306.9	36972
ENSCPOG00000002750	413.758	421.286	236.494	129.483	183.38	119.771	103.535	179.309	304.169	156.211	299.628	191.365	183.876	81.3253	150.794	168.027	167.189	495.64	98.7367	166.696	187.449	156.784	173.146
ENSCPOG00000002752	5894.23	3989.77	5543.2	4195.45	5383.59	4824.95	5700.83	4291.66	4562.53	5778.93	6886.84	4359.44	4468.91	4945.84	4763.28	5008.5	4312.99	4401.94	4802.97	4691.12	3926.2	5747.42	4769.74
ENSCPOG00000002753	338.446	159.798	206.823	116.251	145.475	198.787	166.755	154.813	219.04	159.803	322.677	112.568	106.36	92.3792	227.563	187.415	148.981	202.499	124.37	139.328	126.102	90.2996	118.01
ENSCPOG00000002755	1157.8	1326.12	1446.89	1322.24	1377.91	1337.44	1494.38	1466.81	1244.41	1475.03	1499.06	1229.04	1654.88	1254.62	1301.4	1918.09	1130.6	1295.03	1316.81	1521.41	1364.4	1799.05	1508.98
ENSCPOG00000002756	238.637	228.283	218.168	200.368	143.426	202.114	57.723	213.603	242.952	182.247	74.6766	193.412	171.257	171.336	272.344	169.32	148.981	221.785	130.067	159.232	212.442	252.045	184.754
ENSCPOG00000002757	2510.67	3140.97	2816.11	3172.81	3245.52	3777.78	2713.9	2736.67	2736.56	3319.94	2056.83	3338.15	3473.81	3477.25	2983.9	3320.47	3335.51	2873.56	2585.19	2914.69	3535.4	3481	3320.73
ENSCPOG00000002758	314.855	240.735	268.782	234.393	264.313	241.206	254.714	254.756	263.039	223.544	325.442	253.789	59.4893	224.237	252.238	120.204	215.194	182.249	323.742	103.252	79.5237	107.169	254.399
ENSCPOG00000002760	2.72209	2.0753	9.59937	3.78053	0	0	0.916238	2.9395	1.91301	0	2.7658	0	0	0	0.913906	0	0	15.4285	0	0	0	1.98461	0
ENSCPOG00000002761	8463.88	5930.18	6299.8	6529.93	5640.73	5732.38	7573.62	7904.3	7475.09	8097.86	11550.9	5469.77	16428.1	5339.04	5823.41	12530.9	5940.18	9359.31	5100.13	12714.9	13139.6	11889.8	7048.69
ENSCPOG00000002763	136.104	176.401	141.373	206.984	228.457	266.99	105.367	230.261	219.996	158.007	119.851	314.166	155.033	131.068	215.682	195.17	197.813	134.999	401.592	182.868	265.836	315.552	132.52
ENSCPOG00000002765	3150.36	3155.5	2591.83	3031.99	3257.82	2476.93	3300.29	2600.47	2737.52	3361.24	3734.75	3581.7	3618.03	2405.02	2575.39	2965.03	3402.55	2923.7	3080.77	2580.05	2536.81	3287.5	2365.04
ENSCPOG00000002766	136.104	369.404	252.202	232.503	158.793	205.441	210.735	253.776	263.039	188.531	189.918	260.953	283.025	197.391	160.847	188.707	246.646	301.82	186.081	247.556	379.442	190.522	425.61
ENSCPOG00000002768	484.532	602.875	1015.79	1126.6	932.268	870.004	819.117	1130.73	986.157	1021.66	732.015	770.578	1343.02	1181.98	1029.06	884.081	965.89	744.425	1050.03	1141.99	1037.22	1033.98	1070.8
ENSCPOG00000002769	26.3135	139.045	61.0869	53.8726	100.398	45.7459	32.9846	71.5277	54.5208	44.8884	53.4721	67.5407	48.673	41.847	53.0066	112.449	101.803	27.9641	37.0263	17.416	53.3945	107.169	60.9396
ENSCPOG00000002770	9.07363	89.238	59.3416	62.3788	58.3948	63.2126	88.8751	95.0437	47.8253	60.1504	58.0818	89.0309	115.373	53.6905	76.7681	90.4761	81.1116	65.5711	94.9391	92.0559	94.2924	98.238	56.1032
ENSCPOG00000002771	3615.84	3921.28	3981.99	4033.83	3675.8	3904.21	3376.34	3734.14	3486.46	3430.37	2827.57	4037.09	4312.07	3817.55	3677.56	4247.21	4083.72	3976.69	4346.31	4413.71	3786.46	4027.76	3744.4
ENSCPOG00000002772	449.145	427.512	296.708	291.101	371.883	307.745	390.317	426.227	456.253	383.347	790.097	373.52	405.609	322.932	437.761	568.707	398.109	439.712	429.125	376.932	453.285	481.267	410.133
ENSCPOG00000002774	30.8503	37.3554	34.9068	29.2991	39.9543	30.7745	46.7281	47.0319	35.3907	54.7638	40.5651	30.7003	30.646	44.2157	56.6622	9.04761	23.1747	41.4641	42.7226	12.44	28.4013	17.8615	28.0516
ENSCPOG00000002775	54.4418	2.0753	31.4161	34.0248	39.9543	41.5872	17.4085	17.637	21.0431	22.4442	19.3606	20.4669	37.8568	14.2122	31.9867	45.238	35.5898	36.6427	71.2043	51.0039	32.9455	27.7845	34.8227
ENSCPOG00000002777	1785.69	1977.76	1889.33	2088.75	2080.7	2140.91	1853.55	2014.53	1689.19	2018.18	1261.2	2297.41	1880.22	2251.84	2017.9	1715.17	2104.76	2262.2	2163.66	2022.74	1933.56	1950.87	2305.07
ENSCPOG00000002778	4.53682	0	0.87267	1.89027	0	9.14919	2.74871	0	0	0	0	3.07003	0	6.31653	10.053	2.58503	4.13835	6.74997	13.2915	3.732	0	3.96921	0
ENSCPOG00000002779	255.876	202.342	171.916	191.862	155.72	118.108	252.882	178.329	278.343	165.189	359.554	211.832	156.835	157.913	199.232	279.183	197.813	154.285	171.84	186.6	207.898	252.045	186.688
ENSCPOG00000002780	1077.04	1468.28	1271.48	1183.31	863.629	1139.49	1285.48	1302.2	1221.46	894.176	1457.58	1433.7	1341.21	1144.08	1188.08	1106.39	1167.84	1059.74	1098.45	960.367	1323.5	1359.46	1152.05
ENSCPOG00000002781	761.278	1278.39	1234.83	1400.69	1216.05	1518.76	1024.35	1229.69	1114.33	1239.82	1268.58	1037.67	1606.21	1205.67	1232.86	1345.51	1122.32	1208.24	1206.68	1292.51	1450.74	1286.03	1199.45
ENSCPOG00000002783	283.097	233.472	196.351	220.216	163.915	192.965	184.164	181.269	328.081	167.882	366.929	255.836	90.1353	253.451	243.099	94.3536	188.709	360.641	179.435	85.8359	181.768	124.038	195.394
ENSCPOG00000002784	448.237	665.134	743.515	729.643	638.245	766.868	635.869	891.647	586.338	778.364	931.152	599.679	865.299	729.559	695.483	659.183	742.42	617.14	607.61	712.811	703.217	933.757	599.724
ENSCPOG00000002785	2071.51	2300.47	2078.7	1974.38	2184.17	2307.26	2154.07	2077.24	1957.01	2309.95	2357.38	2203.26	2359.74	2185.52	2297.56	2168.84	2154.42	2194.7	2210.18	2143.41	2153.96	2199.94	2187.06
ENSCPOG00000002786	5178.32	4555.29	5564.14	5210.52	5626.39	5272.43	5566.14	5548.79	5256	5488.95	5012.55	4692.03	6026.44	5229.3	5448.71	5839.58	4712.75	5671.9	5502.67	6325.73	5171.31	6355.7	6084.29
ENSCPOG00000002789	2042.47	2153.13	2870.21	2726.71	3201.47	2380.45	2425.28	3878.18	2608.39	3177.2	3508.88	3086.4	4023.64	2601.62	2746.29	2326.53	2415.97	2487.84	2912.73	3272.96	3361.58	4376.06	2694.89
ENSCPOG00000002790	12368.3	12218.3	9462.36	10375.7	10699.6	9228.2	12476.4	10564.5	12145.7	8921.11	10648.3	12465.3	10217.7	10620.5	10350.9	12667.9	10004	13342.8	10821.2	12464.9	11499.1	12435.5	12559.4
ENSCPOG00000002793	173.306	78.8615	178.897	150.276	193.625	223.739	198.824	77.4067	90.868	172.371	206.513	154.525	147.822	111.329	113.324	131.837	199.468	174.535	189.878	131.864	69.2992	154.799	200.23
ENSCPOG00000002794	70.7743	9.33886	54.9782	35.9151	43.0278	30.7745	54.9743	24.4958	57.3903	29.6263	75.5985	91.0776	36.0541	37.8992	46.6092	43.9455	18.2087	51.1069	29.4311	43.54	21.585	72.4381	35.79
ENSCPOG00000002795	0	22.8283	0.87267	2.8354	3.07341	14.1397	18.3248	7.83866	2.86952	13.4665	42.4089	29.677	0	27.6348	9.13906	0	3.31068	27.9641	0	2.488	14.7687	21.8307	18.3786
ENSCPOG00000002797	810.275	1061.52	694.645	717.356	757.084	953.179	707.336	842.656	857.985	806.195	655.494	820.721	1023.94	845.625	848.105	854.353	758.973	805.175	791.792	879.507	1041.76	804.758	777.706
ENSCPOG00000002801	200.527	224.133	236.494	344.974	385.201	273.644	278.536	300.808	139.65	323.196	206.513	249.696	382.174	312.668	382.013	325.714	323.619	245.892	286.716	401.812	371.489	373.106	295.993
ENSCPOG00000002803	1634.16	1095.76	2135.42	1429.99	2046.89	1754.98	2009.31	1298.28	1502.67	1842.22	734.781	1085.77	1463.8	2043.4	1544.5	1371.36	2203.26	1615.17	1905.43	1271.37	1109.92	1778.21	1678.26
ENSCPOG00000002804	158.789	225.17	78.5403	87.8974	55.3214	138.07	109.949	143.055	112.868	87.9812	336.506	162.712	57.6866	115.277	113.324	56.8707	125.806	242.034	114.876	58.4679	94.2924	52.5921	101.566
ENSCPOG00000002806	1723.99	2333.68	2481.87	2622.75	2769.14	2678.22	2203.55	2605.37	2390.31	2762.43	2356.46	2705.72	3174.56	3057.2	2821.23	1830.2	3040.86	2625.74	2174.11	2310.11	2710.62	2123.53	2342.79
ENSCPOG00000002807	946.38	1987.1	1135.34	1422.43	1411.72	1734.19	1082.08	1801.91	1090.42	1134.78	724.639	1775.5	1826.14	2093.14	1624.01	1037.89	1440.15	1675.92	884.833	914.339	1547.3	1164.96	1205.25
ENSCPOG00000002808	584.342	590.423	824.673	534.946	985.541	766.868	568.984	470.319	730.77	851.083	395.509	687.687	288.433	643.496	681.774	444.625	717.59	672.104	751.918	395.592	477.142	571.567	497.19
ENSCPOG00000002810	2884.51	1896.83	2008.01	1476.3	1555.15	1744.17	2427.11	2086.06	1939.79	2053.19	4913.9	1961.75	2161.44	1438.59	2070	2879.72	2922.5	2452.17	4521.95	2547.71	1988.09	2011.4	2442.42
ENSCPOG00000002811	7814.21	6883.78	6964.78	6512.92	6883.42	7266.95	7824.67	7271.33	6866.75	6986.42	5998.1	7328.16	6857.49	8167.27	7080.03	6810.26	8003.56	7336.25	7578.99	7551.07	7326.41	7500.82	7641.64
ENSCPOG00000002812	6.35154	18.6777	16.5807	4.72567	10.2447	10.8127	3.66495	6.85882	9.56505	7.18214	9.21933	2.04669	10.8162	15.0018	17.3642	5.17006	4.13835	0	3.79756	17.416	12.4966	8.93073	15.4767
ENSCPOG00000002813	578.898	486.658	555.018	436.652	504.039	463.281	390.317	610.435	539.469	491.079	492.312	249.696	439.86	477.687	424.052	364.489	500.74	395.355	431.024	425.448	419.204	479.283	475.91
ENSCPOG00000002815	527.178	694.189	763.586	836.443	1038.81	1000.59	540.58	715.277	578.686	908.54	531.955	629.356	959.039	984.589	1078.41	434.285	1035.41	755.996	724.385	564.775	713.441	711.482	677.107
ENSCPOG00000002816	132.475	176.401	71.5589	108.69	131.132	219.58	207.07	192.047	164.519	143.643	212.967	230.252	129.795	210.814	180.953	121.496	108.425	278.677	147.156	141.816	129.51	131.976	157.669
ENSCPOG00000002817	137.919	40.4684	76.795	56.708	98.3492	29.111	120.943	83.2857	88.955	55.6616	166.87	60.3773	18.0271	33.9513	54.8344	54.2856	91.8713	85.821	79.7489	65.9319	55.6666	71.4458	63.8415
ENSCPOG00000002818	80.7553	29.0542	90.7577	73.7204	74.7863	84.8379	42.1469	49.9714	34.4342	68.2303	62.6914	71.634	50.4758	66.3235	75.8542	80.136	61.2475	80.0353	42.7226	51.0039	60.2108	48.6229	62.8742
ENSCPOG00000002819	27.2209	0	12.2174	5.6708	9.22023	3.32698	1.83248	1.95966	0	7.18214	2.7658	0	0	4.7374	4.56953	0	4.13835	2.89284	13.2915	0	3.40816	0	3.86918
ENSCPOG00000002822	2738.42	2221.61	2460.93	2337.32	2670.79	2219.93	2655.26	2588.72	2388.39	2852.21	3779	2011.89	2859.09	2212.36	2282.94	2738.84	2096.49	2400.1	2281.39	2465.61	2423.2	2656.4	2506.26
ENSCPOG00000002823	949.102	1361.4	1159.78	796.748	1141.26	1132	1057.34	874.01	1203.28	801.706	771.658	1283.27	991.488	1163.82	996.158	854.353	1018.03	1224.64	956.037	1186.77	1067.89	927.804	952.787
ENSCPOG00000002828	5129.32	4249.18	5871.32	5284.24	6162.19	5710.76	5744.81	5393.98	4798.79	6224.22	5211.69	4999.03	5188.19	6001.49	5805.13	4282.1	5802.79	5204.22	5959.33	5218.57	4538.53	4588.41	5437.17
ENSCPOG00000002830	2925.34	2969.76	2361.45	2051.89	2353.21	2166.69	2322.66	2290.85	2693.52	2025.36	2437.59	2309.69	1584.58	2179.99	1994.14	2193.4	2042.69	2827.27	2452.28	2194.41	1850.63	2007.43	2527.54
ENSCPOG00000002833	391.074	422.324	187.624	221.161	239.726	261.168	196.991	413.489	254.43	176.86	415.792	248.672	517.376	250.292	266.861	527.346	235.886	397.284	131.016	516.259	387.394	246.091	310.502
ENSCPOG00000002834	138.827	313.371	184.133	133.264	158.793	163.854	114.53	215.563	367.298	102.345	267.361	457.435	135.203	128.699	138	200.34	136.565	234.32	269.627	227.652	255.612	184.568	191.525
ENSCPOG00000002835	4794.51	4504.44	4075.37	3912.85	4116.32	3514.95	4801.09	3828.2	4264.1	4060.6	4281.46	3611.38	2877.12	3870.45	3570.63	3373.47	4181.39	4043.23	3980.8	3042.82	2881.03	3563.36	4295.76
ENSCPOG00000002836	258.599	272.902	249.584	408.298	335.002	306.914	259.295	317.466	314.69	345.64	241.546	346.913	418.228	398.731	327.178	319.251	367.485	285.427	347.477	360.76	346.496	287.768	266.006
ENSCPOG00000002839	1076.13	1462.05	927.648	775.955	897.436	1003.08	856.682	1038.62	1441.45	555.718	889.665	948.639	645.369	728.769	778.648	872.448	773.043	1019.24	917.112	706.591	715.713	833.535	948.917
ENSCPOG00000002844	1887.32	1752.59	1848.32	1830.72	1935.22	1708.4	2038.63	1660.82	2133.96	1554.03	1404.1	2088.64	1258.29	1467.01	1634.06	1618.23	1506.36	1494.64	1999.42	1735.38	1425.75	1538.07	1971.35
ENSCPOG00000002846	2808.29	2630.45	3100.6	3516.84	3609.21	2910.27	3824.38	2613.21	3112.47	3240.94	4996.88	3799.67	4333.7	3669.11	3332.1	3337.27	2580.67	4448.23	2609.88	3220.71	2984.41	3412.53	3085.67
ENSCPOG00000002847	629.71	1043.88	1104.8	1223.95	1394.3	1241.79	960.217	1283.58	846.507	1235.33	1140.43	1105.21	1739.61	1344.63	1345.27	1262.79	1167.01	1052.03	1163	1398.25	1539.35	1291.98	1121.1
ENSCPOG00000002848	314.855	287.429	405.792	346.864	508.137	358.482	435.213	365.477	405.558	442.599	508.907	436.968	313.671	400.31	312.556	407.142	484.187	309.534	418.682	385.64	381.714	273.876	355.965
ENSCPOG00000002849	891.031	2145.86	1152.8	1359.1	1390.21	1389.84	914.405	1295.34	1844.14	1090.79	981.859	1847.14	849.074	1165.4	1283.12	1476.05	1368.97	1324.92	1335.79	1239.02	1374.62	1260.23	1506.08
ENSCPOG00000002850	1608.75	1146.6	993.098	1080.29	1361.52	1206.03	1113.23	1244.39	1682.49	1247	998.453	1378.44	612.92	1164.61	1195.39	886.666	1417.8	1484.99	1144.02	849.651	869.08	1064.74	1227.5
ENSCPOG00000002851	1.81473	57.0708	0.87267	0.945134	11.2692	0	30.2358	16.6571	19.1301	7.18214	153.041	19.4435	0	0	23.7616	0	0	30.857	0	1.244	4.54421	0	3.86918
ENSCPOG00000002852	0	0	0	6.61594	0	0	0	0	0	0	1.84387	0	0	0	6.39734	0	5.79369	13.4999	0	0	2.27211	5.95382	3.86918
ENSCPOG00000002853	1086.11	929.735	1095.2	936.627	978.369	1089.58	1040.85	891.647	605.468	1141.96	1029.8	1162.52	382.174	1230.93	1056.48	513.129	1115.7	977.781	1206.68	624.487	638.462	654.92	1127.87
ENSCPOG00000002855	8.16627	36.3178	6.10869	16.0673	10.2447	22.4571	3.66495	16.6571	16.2606	5.3866	27.658	27.6303	25.2379	9.47479	16.4503	14.2177	9.93203	21.2142	2.84817	24.88	14.7687	15.8769	5.80378
ENSCPOG00000002859	105.254	98.5769	121.301	88.8426	110.643	94.8188	183.248	114.64	143.476	111.323	91.2714	84.9375	111.768	93.1688	111.497	147.347	119.184	120.535	127.218	164.208	142.007	134.953	120.912
ENSCPOG00000002862	695.948	605.988	725.189	672.935	645.416	640.443	778.802	646.689	676.249	684.996	922.855	602.749	876.115	632.442	640.648	700.543	581.024	603.64	688.309	848.407	742.979	910.935	651.957
ENSCPOG00000002864	3175.77	2903.35	2382.39	2144.51	1989.52	2283.97	2437.19	2142.89	2535.7	1947.26	2221.86	2507.19	2383.18	2082.87	2329.55	2511.36	2003.79	2321.02	2307.02	2349.91	2128.96	2830.05	2214.14
ENSCPOG00000002867	1235.83	1466.2	888.378	1033.03	1299.03	1034.69	1358.78	511.472	959.375	1097.97	1075.9	1118.51	802.204	2469.76	2113.86	855.645	1121.49	1329.74	1772.51	1299.98	1138.33	1012.15	1107.55
ENSCPOG00000002868	12157.8	12138.4	13817.9	14803.6	14767.7	11605.3	13968	15371.6	16255.8	13881.3	15910.7	12970.9	19507.1	13267.9	11753.7	16915.1	13238.6	12523.1	13810.8	15997.8	14980	15513.7	14513.3
ENSCPOG00000002869	11800.3	10012.3	10053.2	11104.4	13413.4	14721	15436.8	12183.2	8400.99	10921.3	9917.23	11276.2	9491.24	12763.3	10416.7	10209.6	10053.7	9336.17	13233.6	10871.3	9328.13	12107.1	11036.8
ENSCPOG00000002870	17737.1	16621.1	19686.6	16398.1	18262.2	17835.9	17827.2	18914.7	16285.5	21985.4	18499.5	15657.2	18124.4	19927.9	18527.6	14827.7	16425.1	18311.7	19977.1	18498.3	16517.1	19740.9	17303
ENSCPOG00000002872	431.905	404.684	295.835	241.954	268.411	251.187	354.584	277.292	373.994	304.343	545.784	308.026	317.276	279.506	313.47	417.482	305.41	292.177	337.034	362.004	341.952	346.314	318.24
ENSCPOG00000002875	4055.91	3193.89	3153.83	3611.36	3415.58	3480.85	3501.86	3863.48	4320.53	3606.33	2919.76	3308.47	3850.58	3679.38	3735.13	4213.6	2845.53	3610.27	3791.87	4245.77	3430.88	3857.08	3654.44
ENSCPOG00000002877	469.107	576.934	623.086	579.367	534.774	418.367	809.038	769.168	862.768	677.814	580.818	788.998	629.144	578.752	413.999	692.788	531.364	602.676	589.572	875.775	741.843	523.936	459.466
ENSCPOG00000002878	0	3.11295	0	0	0	0	0	0	0	0	23.0483	0	0	3.94783	0	0	0	2.89284	0	0	0	0	0
ENSCPOG00000002880	244.988	374.592	372.63	326.071	292.999	314.399	240.971	390.953	219.996	342.947	227.717	439.014	322.684	300.035	271.43	193.877	351.76	274.82	494.633	291.096	301.054	283.799	367.572
ENSCPOG00000002884	1562.48	1974.65	2384.13	2144.51	2202.61	2481.09	1840.72	2623.01	2065.09	2386.27	1815.29	2092.74	2680.62	2615.04	2188.8	1738.43	2688.27	2416.49	2624.12	2861.2	3140.05	1544.02	1749.84
ENSCPOG00000002887	3713.84	2510.08	3173.9	3000.8	3039.6	2433.68	4184.46	2648.49	2987.17	3546.18	5881.93	2237.03	2521.98	2360.01	2574.47	3061.97	2132.9	2559.2	2523.48	2290.2	2043.76	2620.67	3393.27
ENSCPOG00000002891	647.857	310.258	538.437	490.524	297.096	252.85	606.549	690.782	545.208	280.103	1360.77	525.999	255.984	397.941	304.331	449.795	432.871	492.748	666.473	603.339	403.299	561.644	761.262
ENSCPOG00000002892	29.943	48.7696	30.5435	31.1894	36.8809	10.8127	43.9794	25.4756	13.3911	39.5018	42.4089	9.21009	16.2243	37.1096	31.9867	6.46258	24.8301	18.3213	18.9878	26.124	27.2653	36.7152	29.9862
ENSCPOG00000002893	187.824	134.895	112.574	125.703	70.6885	106.463	238.222	117.58	136.78	67.3325	223.108	389.894	162.243	127.91	105.099	63.3333	40.5558	173.571	96.8379	41.052	79.5237	204.415	135.421
ENSCPOG00000002897	1603.31	1646.75	1158.03	1279.71	1469.09	1905.53	1345.04	2220.3	1165.02	1502.86	829.74	1306.81	1114.07	1846.79	1878.08	1081.84	1858.95	1638.31	1482.95	1107.16	1161.05	1519.22	1725.66
ENSCPOG00000002898	2700.31	3708.57	2442.6	2603.84	2606.25	2768.88	1963.5	2168.37	2981.43	2782.18	2522.41	2687.3	3576.57	2401.86	2324.06	3439.38	2782.63	2383.7	2618.42	2791.53	3137.78	3071.18	3019.9
ENSCPOG00000002899	468.199	474.207	512.257	573.696	579.85	530.653	471.862	628.072	572.947	486.59	484.937	435.944	243.365	600.86	647.045	425.238	548.745	385.712	690.207	437.888	394.21	430.66	576.508
ENSCPOG00000002901	342.076	251.112	314.161	168.234	292.999	192.133	199.74	169.511	128.172	168.78	88.5056	254.813	124.387	198.181	181.867	169.32	187.053	169.713	231.651	102.008	128.374	166.707	215.707
ENSCPOG00000002905	166.955	156.685	133.519	132.319	208.992	197.955	79.7127	103.862	191.301	184.042	64.5353	179.085	237.957	183.969	180.953	158.979	172.983	201.535	149.054	143.06	227.211	159.761	110.272
ENSCPOG00000002907	1419.12	1588.64	973.027	2994.18	1113.6	1052.99	1945.17	1390.38	2132.05	1113.23	1159.79	2008.82	1231.25	1320.94	1594.77	1304.15	1349.1	1190.89	2143.73	1658.25	2545.89	1110.39	1655.04
ENSCPOG00000002908	1810.19	1216.13	1302.9	1293.89	1450.65	1337.44	1907.61	1186.58	1061.72	1400.52	1933.29	1397.89	946.42	1037.49	1257.53	1323.54	1320.13	1215.96	1246.55	891.947	770.244	1193.74	1344.54
ENSCPOG00000002909	11.7957	0	0	0	0	3.32698	0	4.89916	3.82602	0	0	0	0	0.789566	0.913906	12.9252	5.79369	1.92856	0	3.732	2.27211	0	0
ENSCPOG00000002911	0	0	0	0	33.8075	0	0	0	0	0	132.758	0	0	0	2.74172	0	3.31068	35.6784	72.1537	0	0	0	0
ENSCPOG00000002914	4047.75	2799.58	4314.48	3467.7	5174.6	4472.29	3702.52	3452.93	2543.35	4919.76	3188.04	3754.65	4084.93	4770.56	3831.09	3364.42	3422.41	3839.77	4564.67	3230.66	2773.11	4472.31	3537.4
ENSCPOG00000002915	380.185	627.779	488.695	601.105	422.082	565.586	398.563	511.472	509.817	452.475	267.361	567.956	495.744	557.434	590.383	254.626	477.565	455.141	368.364	386.884	490.775	305.629	397.559
ENSCPOG00000002917	1645.05	598.725	1392.78	642.691	1528.51	1355.74	393.066	345.881	670.51	1703.96	1390.28	584.329	429.044	1537.28	1884.47	579.047	1400.42	432.962	1518.08	511.283	445.333	384.021	1656.01
ENSCPOG00000002918	97.9952	160.836	130.901	137.044	54.2969	52.3999	81.5452	87.205	21.0431	53.866	113.398	78.7974	122.584	196.602	106.927	31.0204	123.323	112.821	100.635	130.62	67.0271	76.4074	123.814
ENSCPOG00000002919	255.876	241.773	122.174	145.551	161.866	123.93	109.032	162.652	375.907	123.892	562.379	146.338	54.0812	103.433	115.152	149.932	124.978	289.284	187.03	79.6159	81.7958	66.4843	124.781
ENSCPOG00000002921	49562	50420.5	52950.1	58293	60478.6	53173.4	55696.3	59744.3	52365.8	60237.5	37841.7	63107.5	66227.8	76922.7	56539.7	50890.2	59388.6	60415.1	68770.1	72734.1	59755.2	51884.6	60938.7
ENSCPOG00000002922	0	52.9202	6.98136	4.72567	5.12235	0.831744	1.83248	0	11.4781	0	11.9851	0	3.60541	0	79.5098	0	0	4.8214	0.949391	0	4.54421	0.992303	0
ENSCPOG00000002924	220.489	232.434	240.857	404.517	399.543	385.929	267.541	367.437	347.211	407.586	158.572	349.983	355.133	449.263	426.794	192.585	437.01	369.32	346.528	269.948	313.551	295.706	344.357
ENSCPOG00000002925	0	12.4518	0.87267	0	0	0	0	0	6.69554	0	0	8.18675	0	0	0.913906	0	0	0	0	0	0	0	0
ENSCPOG00000002927	783.962	543.729	925.903	803.364	1153.55	988.944	937.311	742.713	865.637	1115.92	595.569	794.115	600.301	928.53	748.489	535.101	824.359	943.067	1016.8	580.947	571.435	654.92	925.702
ENSCPOG00000002928	2940.76	1778.53	1978.34	1770.24	1747.75	1608.59	2393.21	1848.94	2344.39	1677.03	2893.95	1979.15	1943.32	1444.91	1632.24	3316.59	1539.47	1965.2	2036.44	2555.17	1918.79	2749.67	1888.16
ENSCPOG00000002930	2219.41	1573.08	1421.58	1167.24	1214	1087.09	1651.98	1193.44	1318.06	1474.13	2382.28	1447.01	1029.34	1149.61	1016.26	1248.57	1033.76	1670.13	1367.12	1211.65	933.835	1335.64	1603.78
ENSCPOG00000002931	0	0	15.7081	21.7381	0	0	1.83248	14.6975	0.956505	0	48.8625	21.4902	14.4216	0	0	0	32.2791	10.6071	0	0	3.40816	0	0.967296
ENSCPOG00000002933	472.736	1043.88	431.099	763.668	708.934	968.982	564.402	429.166	562.425	458.759	210.201	623.216	380.371	765.879	650.701	456.258	551.228	502.39	624.699	410.52	426.02	521.952	564.901
ENSCPOG00000002934	29.943	114.142	70.6863	287.321	86.0555	164.685	191.494	110.721	109.998	132.87	74.6766	148.385	36.0541	147.649	96.874	98.2312	120.84	134.035	46.5202	125.644	123.83	117.092	118.01
ENSCPOG00000002937	303.059	211.681	273.146	223.997	240.751	177.993	299.61	231.24	182.693	288.183	429.621	216.949	290.236	195.023	163.589	346.394	239.197	230.463	201.271	301.048	261.292	216.322	259.235
ENSCPOG00000002938	3028.78	2000.59	2309.08	2222.01	2306.08	1691.77	2862.33	2065.49	2555.78	2612.5	3954.17	1745.82	1912.67	1680.99	1920.12	2515.23	1829.98	2151.31	2054.48	2125.99	1705.22	2396.41	2359.23
ENSCPOG00000002939	2004.37	1700.71	2014.12	1601.06	1748.77	1643.53	1780.25	1825.43	1934.05	1437.33	1789.47	1722.29	1631.45	1820.74	1707.18	1461.83	1864.74	1880.35	1832.33	1761.5	1532.54	1611.5	1716.95
ENSCPOG00000002940	64.4228	12.4518	23.5621	22.6832	20.4894	30.7745	64.1366	13.7176	40.1732	22.4442	97.7249	14.3268	39.6595	17.3705	29.245	52.9931	19.8641	32.7855	29.4311	29.856	34.0816	21.8307	24.1824
ENSCPOG00000002942	2155.89	2746.66	3284.73	3129.34	3246.55	3015.9	2346.48	3236.39	2644.74	3205.03	3250.74	2485.7	3980.37	3915.46	3311.08	2691.02	3438.14	3259.27	2816.84	3280.42	3570.61	2835.01	2898.02
ENSCPOG00000002943	796.665	1836.64	1428.56	2394.02	1644.28	1761.63	1338.62	2406.47	1490.24	1791.05	1950.81	1303.74	2484.13	1994.44	2350.57	1395.92	2115.52	1770.42	1432.63	1650.79	2785.6	1392.2	1566.05
ENSCPOG00000002945	1184.11	1496.29	845.617	739.095	1015.25	1205.2	1004.2	769.168	1415.63	732.578	992.922	903.612	663.396	874.05	993.416	1212.38	724.211	1230.42	1024.39	859.603	794.101	950.627	892.814
ENSCPOG00000002947	32.6651	107.916	43.6335	15.1221	48.1501	107.295	8.24614	11.758	17.2171	3.59107	117.085	0	32.4487	64.7444	31.9867	21.9728	34.7621	122.464	20.8866	19.904	20.449	21.8307	41.5937
ENSCPOG00000002949	2125.95	1520.16	1898.93	1653.98	1637.1	1310	1608.91	1656.9	1627.97	1475.03	2838.63	1500.22	1728.79	1263.31	1676.1	1803.06	1689.27	1738.6	1606.37	2063.79	1819.96	1700.81	1449.98
ENSCPOG00000002950	934.584	1022.09	1046.33	935.682	781.671	1061.31	1035.35	1055.28	918.245	843.003	675.777	624.24	1058.19	885.893	1082.98	903.468	1045.35	939.21	845.908	1112.13	1147.41	1185.8	906.356
ENSCPOG00000002952	329.373	609.101	657.121	757.997	721.227	602.183	640.45	559.484	608.337	864.55	614.929	653.916	715.674	840.098	633.337	471.768	758.973	532.283	685.46	668.027	565.754	594.39	661.63
ENSCPOG00000002956	4960.55	5168.54	5847.76	6179.28	5859.97	6203.15	5045.72	5949.54	5333.47	5554.49	4422.51	6555.54	5747.02	6693.94	6310.52	5672.85	5926.94	5460.72	6084.65	6150.33	5906.34	5602.54	5671.26
ENSCPOG00000002958	2684.89	2920.99	3019.44	2794.76	3415.58	3079.95	2889.81	2899.32	2534.74	3003.93	2657.01	2568.59	3518.88	3264.07	3051.53	3065.85	3206.39	2704.81	3564.96	3672.28	3046.89	3361.92	3146.61
ENSCPOG00000002959	1214.96	1370.74	1152.8	1067.06	1664.76	1049.66	1327.63	1117.01	1548.58	987.544	1175.46	1423.47	930.196	1217.51	1039.11	1535.51	957.614	1172.57	1250.35	1370.89	1064.48	1367.39	1052.42
ENSCPOG00000002961	2123.23	2941.74	3401.67	3710.59	3372.56	3974.91	2559.05	3413.73	2608.39	4059.7	2361.99	3057.75	5022.34	4303.13	3915.17	2402.79	4614.26	3743.34	3656.11	3327.7	4162.5	3352	3160.16
ENSCPOG00000002962	16.3325	10.3765	13.9627	11.3416	16.3915	9.98093	13.7436	5.87899	4.78253	5.3866	15.6729	16.3735	12.6189	11.0539	9.13906	21.9728	5.79369	4.8214	14.2409	7.46399	15.9047	11.9076	10.6403
ENSCPOG00000002966	2178.58	1615.62	1842.21	1596.33	1641.2	1526.25	2025.8	1659.84	1672.93	1767.7	2449.58	1408.12	1923.49	1512.02	1435.75	1769.45	1201.78	1477.28	1517.13	2001.59	1554.12	1969.72	1662.78
ENSCPOG00000002968	473.644	750.222	648.394	544.397	714.056	798.474	489.271	537.928	551.904	646.392	392.743	792.068	629.144	744.561	661.668	484.693	682	588.211	590.521	608.315	636.19	727.358	635.513
ENSCPOG00000002969	2006.18	2857.69	2847.52	2825.95	2829.59	3126.53	2362.06	2718.05	2737.52	2789.36	2036.55	2968.72	3259.29	3113.26	3188.62	2698.77	3280.05	2893.81	2942.16	2680.82	3308.19	3078.13	2729.71
ENSCPOG00000002972	417.387	112.066	72.4316	31.1894	80.9332	36.5967	169.504	67.6084	145.389	439.008	145.665	29.677	86.5299	60.007	69.4569	84.0135	37.2451	204.428	67.4068	62.1999	63.619	114.115	75.4491
ENSCPOG00000002973	651.487	695.226	328.997	394.121	338.075	588.875	372.909	442.884	417.993	323.196	165.026	498.368	259.59	768.248	479.801	288.231	530.536	424.284	673.118	332.148	372.625	393.944	535.882
ENSCPOG00000002974	0	10.3765	4.36335	0	0	0.831744	0	0.979832	0	0	59.0037	13.3035	0	1.57913	4.56953	5.17006	0.82767	13.4999	0.949391	2.488	5.68026	5.95382	1.93459
ENSCPOG00000002975	66.2375	13.4895	32.2888	14.177	24.5873	10.8127	35.7333	13.7176	42.0862	29.6263	22.1264	42.9804	12.6189	21.3183	36.5562	64.6258	71.1796	44.3569	50.3177	82.1039	23.8571	21.8307	9.67296
ENSCPOG00000002976	1900.93	1599.02	1560.33	1839.23	1876.83	1351.58	2191.64	1732.34	1597.36	1906.86	2703.11	1486.92	1901.85	1658.88	1851.57	2026.66	1700.86	1820.56	1856.06	1829.92	1812	1956.82	2076.78
ENSCPOG00000002977	1875.52	1972.57	1727.01	1484.8	1671.94	1596.95	1973.58	1809.75	1927.36	1778.48	2669.92	1843.04	1251.08	1572.82	1563.69	1848.3	1506.36	1864.92	1424.09	1622.17	1485.96	1677.99	1738.23
ENSCPOG00000002978	411.036	244.886	315.034	284.485	375.981	299.428	409.558	362.538	426.601	329.481	299.628	217.972	259.59	270.032	508.132	398.095	284.718	432.962	419.631	345.832	227.211	399.898	282.45
ENSCPOG00000002979	0	0	0	0	0	0	0	0	0	0	0	0	0	0.789566	0	1.29252	1.65534	0	0.949391	1.244	0	1.98461	0
ENSCPOG00000002983	0	3.11295	13.9627	16.0673	31.7586	24.1206	41.2307	12.7378	13.3911	11.671	39.6431	37.8637	18.0271	12.6331	21.0198	3.87755	6.62136	51.1069	14.2409	11.196	6.81632	6.94612	14.5094
ENSCPOG00000002985	239.544	475.244	529.711	474.457	405.69	596.361	394.898	453.662	378.776	470.43	489.546	454.365	517.376	506.901	503.562	495.033	417.145	398.248	328.489	436.644	524.856	440.583	366.605
ENSCPOG00000002986	284.005	233.472	23.5621	17.0124	14.3426	34.9333	36.6495	45.0723	74.6074	23.3419	370.617	65.494	1.80271	23.687	45.6953	25.8503	14.8981	108.964	18.9878	4.97599	40.8979	28.7768	14.5094
ENSCPOG00000002987	195.083	155.648	226.894	167.289	174.16	171.339	166.755	234.18	167.388	184.042	174.245	100.288	254.181	183.179	234.874	195.17	276.442	182.249	159.498	258.752	257.884	104.192	154.767
ENSCPOG00000002990	645.135	776.163	696.391	878.029	715.08	672.881	1034.43	844.615	890.506	785.546	1281.49	628.333	859.89	799.83	810.635	1115.44	702.691	812.889	827.869	993.955	915.659	939.711	798.986
ENSCPOG00000002991	0	0	56.7236	36.8602	0	0	2.74871	33.3143	6.69554	0	7.37546	11.2568	1.80271	0.789566	1.82781	10.3401	2.48301	5.78569	4.74696	9.95199	7.95237	5.95382	29.9862
ENSCPOG00000002992	667.819	499.11	482.587	617.172	589.071	494.888	553.408	511.472	543.295	623.05	734.781	414.454	412.82	488.741	505.39	462.721	429.561	494.676	639.89	408.032	374.897	541.798	561.032
ENSCPOG00000002993	52.6271	18.6777	26.1801	17.9575	14.3426	43.2507	45.8119	26.4555	18.1736	39.5018	47.0186	17.3968	27.0406	21.3183	20.1059	6.46258	29.7961	42.4284	50.3177	16.172	21.585	29.7691	23.2151
ENSCPOG00000002995	342.983	534.39	315.034	349.699	289.925	459.955	273.955	340.982	269.734	232.522	126.305	473.808	364.146	337.145	302.503	369.659	331.896	328.82	376.908	445.352	446.469	441.575	387.886
ENSCPOG00000002997	0	17.6401	0	7.56107	3.07341	0.831744	0.916238	2.9395	0	5.3866	0	3.07003	7.21082	0.789566	3.65562	0	2.48301	0	0.949391	6.21999	2.27211	0	7.73837
ENSCPOG00000002998	71.6817	41.506	54.1055	42.531	40.9788	38.2602	57.723	50.9513	78.4334	51.1727	59.9256	35.817	32.4487	32.3722	42.9536	67.2108	66.2136	36.6427	65.508	75.8839	60.2108	73.4305	40.6264
ENSCPOG00000002999	1332.01	1772.31	1417.22	1396.91	1404.55	1648.52	1271.74	1223.81	1451.98	1299.07	1134.9	1906.49	1557.54	1486.75	1347.1	1470.88	1368.97	1249.71	1432.63	1114.62	1279.2	1658.14	1594.1
ENSCPOG00000003003	5.44418	10.3765	0.87267	0.945134	4.09788	5.82221	2.74871	11.758	15.3041	2.6933	4.60967	12.2801	3.60541	3.15826	5.48344	6.46258	1.65534	2.89284	2.84817	3.732	6.81632	0.992303	4.83648
ENSCPOG00000003004	1037.12	1718.35	1368.35	1217.33	1341.03	1345.76	1471.48	1526.58	1283.63	1686.01	1716.64	1254.62	2008.21	1571.24	1525.31	1734.56	1647.89	1403.03	1357.63	1592.32	1716.58	1994.53	1349.38
ENSCPOG00000003005	2138.66	2311.89	2727.97	2445.06	2040.75	1858.12	3057.49	2593.62	2948.91	2575.69	4240.89	1661.91	3457.59	2270.79	2555.28	3898.23	2576.54	2340.31	2349.74	3416.02	2767.42	2854.86	2574.94
ENSCPOG00000003007	0	25.9413	0	0	0	0	0	11.758	0.956505	0	4.60967	0	0	0	15.5364	0	9.93203	0.964281	0	0	1.13605	0	0
ENSCPOG00000003011	88.9216	260.45	413.646	304.333	419.008	148.882	47.6444	389.973	183.649	201.1	60.8476	368.404	520.982	407.416	167.245	169.32	682	290.249	267.728	477.695	293.102	131.976	193.459
ENSCPOG00000003012	2022.51	2689.59	1761.05	1678.56	1778.48	1921.33	1939.68	1673.55	2454.39	1517.23	2179.45	2721.07	1319.58	1441.75	1746.47	1893.54	1551.88	1712.56	2203.54	1757.77	1610.92	2011.4	1725.66
ENSCPOG00000003015	1604.22	1425.73	1350.02	1185.2	1237.56	1125.35	1400.01	1086.63	1259.72	1484.01	2012.58	1130.79	1420.53	1144.08	1149.69	1532.92	1290.34	1165.82	1110.79	1401.99	1272.38	1398.16	1123.03
ENSCPOG00000003017	2478.92	2063.89	2012.38	1670.05	1948.54	1639.37	2526.98	1986.12	1905.36	2101.67	3178.83	1739.68	1869.41	1703.09	1848.83	2277.41	1822.53	2010.53	1736.44	2098.63	1673.41	2152.31	1991.66
ENSCPOG00000003023	2719.37	2265.19	3040.38	3068.85	2932.03	2779.69	3035.5	2657.3	2678.21	3006.62	2352.77	2399.74	2682.43	3361.18	2768.22	2364.01	3017.68	2840.77	2883.3	2424.55	2272.11	2839.97	2893.18
ENSCPOG00000003025	31105.3	30673	36335.4	35223.2	38257.8	39988.6	43832.8	45848.3	36728.8	32978.6	33093.7	34877.6	39792.9	36630.3	36825.8	44935.6	37696.2	48731.9	45163.5	44551.3	43736.9	38167	33498.4
ENSCPOG00000003027	136.104	93.3886	178.897	178.63	173.136	216.253	168.588	170.491	113.824	140.052	68.223	161.688	164.046	187.127	192.834	223.605	176.294	137.892	172.789	170.428	167	165.715	121.879
ENSCPOG00000003028	1256.7	1378	1373.58	1650.2	1617.64	1656.83	1408.26	1599.09	1536.15	1402.31	1043.63	1629.16	1921.68	1495.44	1555.47	1541.97	1489.81	1480.17	1593.08	1859.78	1710.9	1741.49	1585.4
ENSCPOG00000003031	294.893	360.065	516.621	373.328	385.201	375.948	429.715	345.881	249.648	416.564	347.569	256.859	353.33	473.74	516.357	409.727	376.59	458.998	391.149	296.072	416.931	312.576	307.6
ENSCPOG00000003032	0.907363	0	0	2.8354	0	4.15872	1.83248	2.9395	0	0.897767	34.1115	4.09337	7.21082	1.57913	0	0	0	5.78569	3.79756	0	1.13605	0	4.83648
ENSCPOG00000003033	1384.64	1284.61	1268.86	1070.84	1245.76	1152.8	1166.37	1160.12	1267.37	1189.54	1144.12	1274.06	868.904	1148.82	1171.63	1256.32	1108.25	1316.24	1307.31	1145.72	939.516	1153.06	1307.78
ENSCPOG00000003034	13.6104	1.03765	0	10.3965	0	0	0	3.91933	0	0	132.758	14.3268	0	0	42.9536	0	3.31068	0	7.59513	0	1.13605	0	0
ENSCPOG00000003037	30.8503	134.895	2.61801	39.6956	50.1991	40.7555	58.6392	7.83866	114.781	34.1152	105.1	41.9571	36.0541	127.12	101.444	105.986	24.0024	72.3211	20.8866	19.904	40.8979	70.4535	37.7245
ENSCPOG00000003039	0	28.0166	0	0	0	0	0	4.89916	4.78253	6.28437	163.182	0	0	0	13.7086	0	16.5534	22.1785	4.74696	0	2.27211	0	0
ENSCPOG00000003041	1349.25	1220.28	1141.45	1357.21	1100.28	1448.9	1191.11	1088.59	1083.72	1245.2	896.119	1285.32	1575.56	1531.76	1252.97	1432.11	1228.26	1349.03	1372.82	1563.71	1616.6	1342.59	1329.06
ENSCPOG00000003043	861.088	726.356	781.912	1127.54	785.769	605.51	534.167	807.382	942.158	768.489	628.758	552.605	969.856	1034.33	804.237	1102.52	1035.41	728.032	760.462	767.547	1339.41	994.288	690.649
ENSCPOG00000003045	44.4608	21.7907	43.6335	42.531	108.594	62.3808	43.9794	102.882	20.0866	98.7544	31.3457	112.568	43.2649	127.12	76.7681	27.1428	83.5946	48.214	76.9007	14.928	31.8095	36.7152	90.9258
ENSCPOG00000003046	2078.77	2561.96	2440.86	3786.21	2822.42	2378.79	2079.86	2016.49	1548.58	2103.47	1319.29	2930.86	3549.53	2789.54	2355.14	2057.68	2502.05	2058.74	1990.87	1408.21	1638.19	2514.5	1661.81
ENSCPOG00000003047	11.7957	13.4895	19.1987	1.89027	52.248	57.3903	21.0735	15.6773	35.3907	1.79553	145.665	12.2801	18.0271	41.847	38.3841	14.2177	7.44903	52.0712	0	23.636	35.2176	8.93073	32.8881
ENSCPOG00000003051	2.72209	0	0	0	5.12235	0	0	0	0	0	0	0	0	0	0	0	4.13835	0	14.2409	0	1.13605	0	0
ENSCPOG00000003052	1242.18	1481.77	1156.29	918.67	992.712	1028.04	1265.32	1061.16	1631.8	908.54	1125.68	1180.94	737.307	1153.56	1036.37	1264.08	983.271	1226.57	1485.8	1006.39	886.121	1181.83	1223.63
ENSCPOG00000003053	6975.81	4323.89	7271.09	5760.59	6920.3	5420.48	6082.9	4886.42	5364.08	7800.7	5785.13	5392	5555.94	7041.35	5856.31	4927.07	6111.51	6469.36	7084.36	5380.29	4436.29	5760.32	6106.54
ENSCPOG00000003055	10988.2	8435.07	7711.78	7543.11	7235.84	6559.13	9159.63	6899	7149.88	8674.23	11857.9	7040.6	6578.07	6580.24	7188.79	7196.73	5986.53	7453.89	6604.91	6380.47	5350.81	7886.83	8176.55
ENSCPOG00000003056	2817.36	2419.8	3248.95	2977.17	3059.07	3745.34	4401.61	2623.99	2805.43	2593.65	2456.03	3389.31	2810.42	4231.28	3169.43	3158.91	2740.41	3125.23	4021.62	3850.18	2353.9	2662.35	3170.8
ENSCPOG00000003060	22.6841	6.22591	6.10869	5.6708	13.3181	19.1301	15.576	23.516	0	11.671	13.829	19.4435	5.40812	8.68523	12.7947	27.1428	11.5874	12.5357	8.54452	13.684	6.81632	4.96152	6.77107
ENSCPOG00000003062	1029.86	1031.43	644.903	529.275	1026.52	768.532	715.582	331.183	1450.06	822.355	825.13	998.783	645.369	755.615	980.621	511.836	1136.39	1035.64	1611.12	930.511	656.639	916.888	1082.4
ENSCPOG00000003065	450.052	464.868	527.093	483.908	596.242	577.23	411.391	355.679	303.212	515.318	361.398	389.894	391.187	564.54	583.072	218.435	994.031	429.105	658.877	221.432	239.707	372.114	358.867
ENSCPOG00000003067	993.563	1084.35	1228.72	1300.5	1205.8	1238.47	1088.49	1474.65	1209.98	1412.19	1651.18	1399.93	1726.99	1283.83	1404.67	1309.32	1240.68	1198.6	1113.64	1577.39	1557.53	1241.37	1186.87
ENSCPOG00000003068	1276.66	956.714	1134.47	1141.72	1238.58	986.449	1184.7	942.598	1117.2	1137.47	1410.56	1013.11	1238.46	1024.07	1244.74	1498.03	1210.05	1273.82	1327.25	1316.15	1180.36	1324.73	955.688
ENSCPOG00000003069	2485.27	1983.99	2092.66	2168.14	2334.77	2361.32	2550.81	2209.52	2115.79	2242.62	1771.96	2237.03	2516.58	2360.01	1911.89	2311.02	2242.16	1622.88	2307.97	2210.59	2134.64	2616.7	2226.72
ENSCPOG00000003073	699.577	671.36	1172.87	1268.37	1079.79	1469.69	806.289	949.457	590.164	1200.31	1051	949.663	1384.48	1611.5	1164.32	762.584	1141.36	1051.07	1095.6	1103.43	1180.36	1180.84	1059.19
ENSCPOG00000003074	0	0	2.61801	0	0	0	0	2.9395	0	0	0	0	0	0	0	0	0	5.78569	0	0	1.13605	0	0
ENSCPOG00000003078	563.473	539.579	694.645	697.509	681.273	830.081	470.946	692.741	404.602	786.444	397.353	535.209	942.815	800.62	605.92	661.768	754.835	622.925	743.373	572.239	704.353	706.52	569.737
ENSCPOG00000003079	1803.84	2559.89	2650.3	2600.06	2289.69	2395.42	1896.61	2704.34	2365.44	2520.93	1762.74	2068.18	1946.92	2595.3	2970.19	2183.06	2977.13	2445.42	2639.31	2286.47	2686.77	1984.61	2487.89
ENSCPOG00000003085	363.853	649.57	465.133	519.824	439.498	588.875	460.868	666.286	535.643	395.915	461.888	422.641	813.02	632.442	550.171	616.53	795.39	406.927	501.279	630.707	563.482	598.359	528.144
ENSCPOG00000003086	42.6461	71.5979	37.5248	63.324	97.3247	29.9428	46.7281	36.2538	38.2602	180.451	86.6617	14.3268	16.2243	33.1618	34.7284	15.5102	58.7645	101.249	46.5202	31.1	52.2584	13.8922	58.0378
ENSCPOG00000003087	4.53682	4.1506	1.74534	1.89027	9.22023	4.99046	6.41366	1.95966	5.73903	10.7732	14.7509	5.11672	5.40812	1.57913	11.8808	3.87755	8.2767	11.5714	3.79756	2.488	1.13605	14.8846	0
ENSCPOG00000003088	6.35154	26.9789	6.98136	0.945134	4.09788	0	6.41366	0	7.65204	0	236.937	10.2334	0	0	20.1059	5.17006	11.5874	13.4999	12.3421	0	3.40816	4.96152	0.967296
ENSCPOG00000003089	1997.11	492.884	89.885	132.319	75.8108	29.9428	262.96	131.297	528.947	188.531	1653.95	369.427	34.2514	6.31653	58.49	91.7686	39.7281	1126.28	30.3805	18.66	21.585	1.98461	23.2151
ENSCPOG00000003091	1220.4	1201.6	1201.67	1411.08	1048.03	1206.86	1340.46	1487.38	1426.15	1420.27	1921.31	1074.51	1409.72	1283.83	1545.42	1647.96	1066.04	1392.42	1243.7	1451.75	1410.98	1410.06	1384.2
ENSCPOG00000003092	1480.82	1193.3	1046.33	948.914	1358.45	1027.2	1081.16	1386.46	1043.55	1387.05	1172.7	1315	751.728	1422.8	1333.39	769.047	1517.12	1260.32	887.681	747.643	519.176	894.065	1543.8
ENSCPOG00000003093	166.047	177.438	133.519	223.997	371.883	160.527	153.928	222.422	55.4773	183.145	111.554	462.551	293.841	437.42	305.245	188.707	171.328	332.677	115.826	225.164	220.394	280.822	290.189
ENSCPOG00000003094	8.16627	0	1.74534	2.8354	1.02447	1.66349	1.83248	3.91933	3.82602	0.897767	2.7658	2.04669	0	0.789566	3.65562	1.29252	0	4.8214	0	0	0	6.94612	0
ENSCPOG00000003095	8266.99	9411.5	6188.98	5283.3	6433.67	4978.82	3938.91	11898.1	5018.78	7272.81	6474.74	15651	9799.51	7150.31	8364.07	2070.61	16826.5	8534.85	7573.29	4499.54	7755.83	11771.7	6772.04
ENSCPOG00000003096	234.1	286.392	306.307	336.468	351.393	422.526	250.133	307.667	178.866	368.982	229.561	399.104	398.398	372.675	393.894	219.728	335.206	318.213	290.514	256.264	291.966	222.276	303.731
ENSCPOG00000003097	448.237	274.978	262.674	278.814	294.023	258.672	407.726	264.555	277.387	309.73	519.97	169.875	349.725	241.607	253.152	426.53	256.578	241.07	263.931	366.98	326.047	351.275	247.628
ENSCPOG00000003098	47.1829	47.732	27.9254	22.6832	14.3426	27.4476	60.4717	13.7176	12.4346	19.7509	34.1115	26.6069	3.60541	17.3705	31.9867	23.2653	24.0024	7.71425	11.3927	21.148	11.3605	32.746	22.2478
ENSCPOG00000003099	289.449	469.018	572.472	622.843	601.364	490.729	432.464	477.178	631.293	569.184	631.524	289.606	553.431	499.795	529.152	445.918	547.917	518.783	562.04	526.211	499.863	475.313	515.569
ENSCPOG00000003100	3338.19	2031.72	3230.62	2635.98	3601.01	2724.79	3167.43	2837.59	2660.04	3353.16	2085.41	2820.33	2496.75	3295.65	2875.15	3342.44	3233.71	2766.52	4040.61	2871.15	2380.03	2980.88	3083.74
ENSCPOG00000003104	1531.63	1957.01	1547.24	1420.54	1495.73	1758.31	1738.1	1530.5	1771.45	1268.55	1329.43	1583.11	1270.91	1568.87	1566.43	1761.7	1537.81	1616.13	2014.61	1583.61	1438.24	1348.54	1572.82
ENSCPOG00000003105	748.575	877.853	866.561	601.105	662.832	563.923	844.771	793.664	910.593	602.402	1042.71	931.243	495.744	701.135	721.986	626.87	710.968	787.817	765.209	585.923	513.496	505.082	810.594
ENSCPOG00000003107	4584.91	2803.73	3511.62	2831.62	3455.54	2716.48	3663.12	2984.57	3260.73	3794.86	5001.49	2208.38	3176.37	2495.03	2929.98	3493.67	2388.65	2564.02	2785.51	2418.33	2008.54	3087.06	3085.67
ENSCPOG00000003109	744.038	831.159	929.394	806.199	1013.2	705.319	724.744	809.341	801.551	947.144	698.825	839.142	831.047	801.409	1031.8	869.863	858.293	940.174	844.009	847.163	819.094	892.081	728.374
ENSCPOG00000003110	113.42	204.417	262.674	366.712	352.418	360.977	265.709	373.316	330.951	352.823	187.152	294.723	342.514	419.26	336.317	281.768	278.097	318.213	302.856	334.636	428.292	337.383	342.423
ENSCPOG00000003113	198.713	454.491	496.549	474.457	474.33	492.393	460.868	609.456	335.733	547.638	366.007	329.517	636.355	816.411	476.145	426.53	618.269	403.069	640.839	644.391	665.727	463.406	410.133
ENSCPOG00000003114	20.8694	12.4518	2.61801	4.72567	13.3181	0	13.7436	3.91933	2.86952	11.671	2.7658	16.3735	3.60541	8.68523	4.56953	3.87755	0	6.74997	3.79756	14.928	0	15.8769	2.90189
ENSCPOG00000003116	1256.7	792.765	1494.01	1472.52	1431.19	1762.47	1290.06	1078.8	884.767	1457.08	1384.74	1197.31	1279.92	1512.02	1267.59	1121.9	1671.06	1431.96	1298.77	1231.56	1398.48	1410.06	1104.65
ENSCPOG00000003119	744.945	725.318	1003.57	1334.53	1204.78	1541.22	883.253	1176.78	629.38	843.901	1305.46	863.702	1505.26	1293.31	1336.13	606.19	1732.31	1432.92	1211.42	1112.13	1429.15	858.342	761.262
ENSCPOG00000003120	29.0356	29.0542	25.3074	35.9151	46.1012	43.2507	48.5606	29.395	15.3041	40.3995	62.6914	48.0971	75.7136	34.7409	49.3509	62.0407	29.7961	31.8213	25.6336	43.54	79.5237	67.4766	38.6918
ENSCPOG00000003121	167.862	107.916	130.028	96.4036	149.573	113.949	152.095	96.0235	184.606	150.825	175.167	150.431	70.3055	134.226	89.5628	107.279	136.565	143.678	125.32	85.8359	81.7958	86.3304	140.258
ENSCPOG00000003122	1641.42	1968.42	1504.48	1799.53	1485.48	1977.89	1254.33	2025.31	2346.31	1192.23	1094.33	2250.33	928.393	1504.91	1468.65	1192.99	1701.69	1638.31	1929.16	1317.39	1207.62	1160.99	1985.86
ENSCPOG00000003123	1253.98	1695.52	1759.3	2039.6	1306.2	2148.4	1237.84	2020.41	1790.58	1765.91	1222.48	2024.17	1148.32	2413.7	1895.44	1291.22	2187.53	1710.63	2004.16	1517.68	1627.96	1395.18	1813.68
ENSCPOG00000003125	0	0	0.87267	2.8354	0	0	3.66495	4.89916	0	0	0	0	0	2.3687	5.48344	0	0	4.8214	5.69635	2.488	3.40816	1.98461	0.967296
ENSCPOG00000003127	2614.11	1838.72	1954.78	1808.04	1736.48	2061.89	2087.19	1904.79	2063.18	1829.65	1686.22	2402.81	2581.47	1749.68	1815.02	2905.57	1999.65	2269.92	2157.97	3060.24	2499.32	3371.85	2107.74
ENSCPOG00000003129	731.335	339.312	343.832	372.383	524.529	576.399	427.883	340.002	388.341	338.458	219.42	639.59	228.944	526.64	520.013	252.041	311.204	422.355	391.149	375.688	318.095	352.268	473.008
ENSCPOG00000003132	91.6437	125.556	143.991	103.02	84.0066	103.136	109.949	122.479	91.8245	80.799	139.212	157.595	216.325	119.224	115.152	184.83	115.874	116.678	92.0909	167.94	263.564	179.607	94.795
ENSCPOG00000003133	10.8884	36.3178	7.85403	37.8053	46.1012	12.4762	16.4923	27.4353	76.5204	24.2397	5.5316	56.2839	18.0271	22.1078	21.9337	23.2653	13.2427	19.2856	49.3683	57.2239	60.2108	22.823	19.3459
ENSCPOG00000003134	342.076	439.964	531.456	536.836	591.119	480.748	538.748	608.476	545.208	580.855	583.584	516.788	580.471	600.86	622.37	492.448	564.471	493.712	597.167	512.527	519.176	498.136	569.737
ENSCPOG00000003136	55.3492	42.5437	66.3229	41.5859	11.2692	47.4094	27.4871	72.5076	59.3033	17.0576	81.1301	18.4202	61.292	74.2192	70.3708	41.3605	69.5242	28.9284	93.0403	70.9079	152.231	51.5998	85.122
ENSCPOG00000003137	688.689	538.541	807.22	888.426	657.71	651.256	810.87	823.059	634.163	641.006	681.309	661.08	713.871	750.088	745.747	659.183	731.66	712.604	587.673	663.051	664.591	668.812	623.906
ENSCPOG00000003140	0.907363	24.9036	6.98136	0.945134	7.17129	9.98093	0	3.91933	16.2606	0.897767	3.68773	3.07003	1.80271	4.7374	15.5364	7.75509	3.31068	1.92856	8.54452	1.244	2.27211	5.95382	5.80378
ENSCPOG00000003142	3936.14	3995.99	4425.31	4206.79	4490.25	4196.15	4152.39	4371.03	4192.36	4202.45	3681.28	4457.68	3931.7	4644.23	4186.6	3988.7	4404.03	4478.12	5002.34	4554.28	4264.74	4029.74	4280.28
ENSCPOG00000003143	1389.17	1171.51	961.682	808.089	1005.01	934.88	1233.26	877.929	1144.94	840.31	1120.15	962.966	466.901	1016.96	1012.61	819.455	914.575	962.352	1231.36	705.347	606.652	816.666	1076.6
ENSCPOG00000003146	515.382	485.621	546.291	567.08	462.036	511.523	655.11	507.553	550.947	526.092	789.175	506.555	392.99	548.748	513.615	495.033	384.866	547.712	495.582	524.967	428.292	489.206	528.144
ENSCPOG00000003149	237.729	92.3509	237.366	348.754	279.68	192.133	400.396	171.471	551.904	194.815	336.506	135.081	210.917	60.007	144.397	252.041	100.148	169.713	167.093	157.988	118.15	256.014	122.847
ENSCPOG00000003152	1.81473	8.30121	2.61801	5.6708	12.2936	4.99046	3.66495	2.9395	5.73903	4.48884	6.45353	2.04669	5.40812	6.31653	5.48344	2.58503	4.13835	3.85712	7.59513	1.244	5.68026	0.992303	4.83648
ENSCPOG00000003155	2801.94	1986.06	2427.77	2126.55	2336.82	1919.67	2419.78	2126.24	2250.66	2556.84	3034.08	2331.18	2087.53	2119.2	2191.55	2312.31	2246.3	2224.6	2344.05	2183.22	1874.49	2366.64	2219.94
ENSCPOG00000003156	0	19.7154	3.49068	2.8354	5.12235	3.32698	2.74871	0.979832	0	3.59107	13.829	0	0	0	0.913906	3.87755	0	58.8211	0	3.732	2.27211	6.94612	0
ENSCPOG00000003158	2186.75	1869.85	2045.54	1745.66	2373.7	2232.4	2431.69	2404.51	2484.04	1909.55	1470.48	2161.3	1982.98	1779.68	1897.27	2462.24	2024.48	2274.74	2309.87	2531.54	2002.86	2067.96	2013.91
ENSCPOG00000003163	15.4252	28.0166	0	7.56107	15.3671	0	10.0786	4.89916	0	1.79553	98.6468	29.677	0	3.15826	6.39734	2.58503	2.48301	10.6071	0	2.488	13.6326	19.8461	0
ENSCPOG00000003164	3356.34	3090.13	1851.81	2205	2659.53	3344.44	2274.1	2385.89	2345.35	2005.61	1375.52	2172.56	2457.09	2243.95	2413.63	2150.75	2625.37	1646.03	2077.27	1826.19	2378.89	2883.63	1706.31
ENSCPOG00000003165	899.197	2107.47	1097.82	1380.84	1382.01	2857.87	1649.23	1900.87	1010.07	1126.7	718.186	1772.43	1352.03	1861.01	1245.65	1633.74	1104.94	1827.31	1866.5	1730.4	1577.98	1651.19	1541.87
ENSCPOG00000003169	64.4228	129.706	104.72	47.2567	61.4682	50.7364	30.2358	38.2134	60.2598	37.7062	51.6283	79.8208	66.7001	76.5879	69.4569	102.109	72.8349	58.8211	93.0403	49.7599	59.0748	92.2842	72.5472
ENSCPOG00000003170	106.161	138.008	103.848	130.428	103.472	142.228	104.451	115.62	109.998	109.528	144.743	106.428	153.23	95.5375	116.98	155.102	130.772	108.964	92.0909	199.04	170.408	185.561	112.206
ENSCPOG00000003171	127.031	213.756	209.441	201.313	135.23	221.244	156.677	203.805	184.606	146.336	142.9	209.785	223.535	217.92	201.973	173.197	191.192	181.285	140.51	205.26	244.251	169.684	142.193
ENSCPOG00000003173	643.32	758.523	1046.33	835.498	664.881	836.735	1225.01	1029.8	436.166	745.147	938.528	746.017	919.38	791.145	901.111	743.196	714.279	713.568	846.857	1156.92	922.475	1095.5	1152.05
ENSCPOG00000003175	2327.39	1856.36	1906.78	1862.86	2374.72	2124.27	2125.67	2297.71	2410.39	1992.15	1362.62	2024.17	1685.53	2217.89	1878.08	2079.66	2137.04	2069.35	2700.07	2051.35	1576.84	1805.99	2360.2
ENSCPOG00000003176	1528	1953.9	1326.46	1346.82	1116.67	1436.42	1081.16	1417.82	2005.79	1142.86	1410.56	1557.53	1429.55	1438.59	1334.3	1490.27	1397.11	1505.24	1463.96	1526.39	1339.41	1525.17	1604.74
ENSCPOG00000003177	78.0332	317.521	187.624	208.875	220.261	322.717	119.111	392.913	141.563	266.637	62.6914	301.886	236.154	343.461	311.642	152.517	250.784	213.106	170.89	148.036	243.115	166.707	199.263
ENSCPOG00000003178	1575.18	1415.36	1631.89	1611.45	1608.42	1418.12	1824.23	1545.2	1584.93	1787.45	2009.81	1078.6	1786.48	1332.79	1388.22	2035.71	1458.35	1481.14	1572.19	1921.98	1699.54	1928.05	1544.77
ENSCPOG00000003179	755.834	320.634	520.111	472.567	435.4	365.967	554.324	561.444	484.948	457.861	1074.97	402.174	488.533	314.247	385.668	745.781	334.379	565.069	274.374	533.675	326.047	363.183	542.653
ENSCPOG00000003181	3553.23	3898.46	3565.73	3122.72	3012.97	3192.23	2924.63	3040.42	2513.7	2358.43	2055.91	3495.74	1800.9	3252.22	2731.67	2002.11	2828.15	3310.38	2979.19	2526.56	2218.71	2551.21	3507.42
ENSCPOG00000003183	36.2945	32.1672	41.8882	27.4089	26.6362	49.0729	9.16238	45.0723	32.5212	32.3196	7.37546	26.6069	23.4352	29.2139	43.8675	50.4081	43.8665	44.3569	21.836	32.344	34.0816	60.5305	26.117
ENSCPOG00000003184	279.468	415.06	333.36	428.146	473.305	658.741	359.165	460.521	461.992	435.417	382.602	460.505	623.736	476.898	494.423	725.101	578.541	486.962	487.987	472.72	516.904	376.083	363.703
ENSCPOG00000003185	483.625	0	369.139	25.5186	656.686	39.9237	17.4085	327.264	427.558	18.8531	424.089	478.925	205.508	337.934	482.542	117.619	337.689	705.854	482.291	184.112	178.36	140.907	213.772
ENSCPOG00000003187	1111.52	747.109	868.307	736.259	817.527	820.1	953.803	757.41	968.94	855.572	895.197	819.698	694.042	720.084	735.694	829.795	772.216	910.281	791.792	931.755	785.013	891.088	866.697
ENSCPOG00000003188	201.435	131.782	197.223	213.6	222.31	146.387	222.646	157.753	198.953	206.486	353.1	211.832	120.781	198.181	201.973	214.558	177.121	130.178	174.688	174.16	127.238	163.73	166.375
ENSCPOG00000003189	0	13.4895	0	0	0	0	0	0	0	0	23.0483	0	0	0	3.65562	0	0	8.67853	0	4.97599	0	0	1.93459
ENSCPOG00000003190	572.546	404.684	534.074	434.761	403.641	365.136	549.743	291.01	395.037	542.251	325.442	591.493	488.533	465.054	392.98	420.068	401.42	429.105	690.207	547.359	389.666	517.982	416.905
ENSCPOG00000003196	429.183	746.071	527.965	997.116	495.844	635.453	459.035	1729.4	749.9	552.127	583.584	731.691	1224.04	611.914	621.456	846.598	611.648	953.674	461.404	746.399	1872.22	629.12	698.388
ENSCPOG00000003197	1944.48	3347.46	2600.56	3660.5	3370.51	4366.66	2530.65	3929.13	3363.07	3457.3	1699.12	4065.74	3749.63	4692.39	4219.5	2577.28	3597.05	3239.98	3316.22	2934.59	3462.69	2661.36	3032.47
ENSCPOG00000003198	188.732	284.316	260.056	317.565	186.454	262.831	175.001	324.324	211.388	186.736	129.071	149.408	227.141	220.289	222.993	162.857	199.468	239.142	133.864	171.672	288.557	221.284	248.595
ENSCPOG00000003199	4742.79	4233.62	5936.77	6680.2	6000.32	4707.67	5202.4	5220.54	5351.65	6081.47	5620.1	6109.36	6787.19	7362.7	5845.34	4793.94	6244.77	5787.61	6318.2	5706.22	5249.7	5823.83	6247.76
ENSCPOG00000003200	409.221	710.791	966.046	869.523	674.102	787.662	798.043	847.555	714.509	814.275	475.717	784.904	944.618	1055.65	796.012	677.278	861.604	692.354	928.505	845.919	842.951	712.474	775.771
ENSCPOG00000003202	0	0	0	0	19.4649	3.32698	15.576	15.6773	9.56505	3.59107	0.921933	1.02334	3.60541	0.789566	0	0	3.31068	16.3928	0	0	1.13605	0	0
ENSCPOG00000003203	23.5914	59.1461	14.8354	35.9151	4.09788	9.98093	15.576	12.7378	0.956505	20.6486	34.1115	20.4669	3.60541	16.5809	14.6225	25.8503	5.79369	14.4642	10.4433	9.95199	14.7687	1.98461	11.6076
ENSCPOG00000003204	0	0	1.74534	0	0	0	0	0	0	0	0	0	0	0	2.74172	0	0	0	7.59513	0	0	0	0
ENSCPOG00000003205	2331.02	3011.26	3430.47	3016.87	3092.88	2822.94	2427.11	2642.61	3060.82	2729.21	1507.36	3629.8	2188.48	3436.98	3331.19	2512.65	3467.94	2557.27	3545.03	2628.57	2395.94	3018.59	3144.68
ENSCPOG00000003207	106.161	77.8238	34.0341	41.5859	46.1012	59.0538	49.4768	59.7698	65.0424	35.9107	69.145	53.2139	18.0271	30.0035	28.3311	34.8979	34.7621	53.9997	81.6476	21.148	38.6258	36.7152	59.0051
ENSCPOG00000003208	1308.42	2017.19	1477.43	1739.05	1557.2	1599.44	1450.4	1599.09	1632.75	1484.91	1544.24	1623.02	1957.74	1842.06	1594.77	1702.24	1604.85	1511.03	1743.08	1681.89	1838.13	1496.39	1642.47
ENSCPOG00000003210	244.081	425.437	288.854	250.46	248.946	296.101	227.227	202.825	489.731	136.461	366.929	415.477	109.965	180.811	268.688	332.176	268.165	224.677	250.639	148.036	269.245	224.261	204.099
ENSCPOG00000003211	357.501	399.496	233.876	246.68	236.653	235.384	331.678	312.566	394.08	230.726	258.141	184.202	268.603	187.917	278.741	381.292	230.92	183.213	243.994	323.44	237.435	273.876	212.805
ENSCPOG00000003212	1408.23	1809.66	1680.76	1646.42	1551.05	1616.08	1235.09	1405.08	1627.97	1150.04	1300.85	1712.05	1573.76	1418.85	1740.99	1583.33	1544.43	1341.31	1441.18	1465.43	1585.93	1553.95	1335.84
ENSCPOG00000003213	231.378	256.3	345.577	394.121	266.362	274.476	292.28	293.95	272.604	286.388	331.896	252.766	221.733	328.459	277.827	222.313	284.718	276.749	360.769	256.264	237.435	256.014	283.418
ENSCPOG00000003214	3066.89	2628.37	3156.45	3317.42	3431.98	3845.99	2436.28	3513.68	2401.78	3434.86	2125.98	3521.32	3106.06	3405.4	3507.57	3286.87	3825.49	3270.84	3358	3632.48	3513.81	2998.74	2812.9
ENSCPOG00000003217	2626.82	3766.67	2662.52	2876.04	2860.32	3478.35	1995.57	2740.59	2793.95	2601.73	1690.83	2938.02	2817.63	2997.19	3072.55	2379.52	2972.16	3033.63	3102.61	2395.94	2801.51	2691.13	2897.05
ENSCPOG00000003219	883.772	913.133	1190.32	1489.53	1227.32	1297.52	1010.61	1384.5	1333.37	1199.42	748.61	1415.28	1377.27	1326.47	1356.24	1421.77	1355.72	1252.6	1435.48	1576.15	1581.39	1229.46	1270.06
ENSCPOG00000003220	327.558	126.593	213.804	212.655	150.597	74.0252	127.357	137.176	123.389	181.349	189.918	252.766	169.454	278.717	124.291	153.809	278.097	177.428	150.004	154.256	165.864	147.853	172.179
ENSCPOG00000003221	3.62945	6.22591	8.7267	6.61594	5.12235	5.82221	10.0786	4.89916	1.91301	1.79553	0	13.3035	1.80271	9.47479	3.65562	2.58503	9.93203	0.964281	7.59513	1.244	2.27211	1.98461	4.83648
ENSCPOG00000003222	194.176	194.041	133.519	182.411	159.817	160.527	114.53	223.402	88.955	147.234	105.1	171.922	201.903	154.755	171.814	121.496	149.808	213.106	164.245	128.132	194.265	172.661	115.108
ENSCPOG00000003223	27.2209	35.2801	52.3602	22.6832	16.3915	17.4666	16.4923	15.6773	31.5647	11.671	20.2825	26.6069	10.8162	37.1096	12.7947	15.5102	25.6578	46.2855	45.5708	24.88	28.4013	59.5382	8.70566
ENSCPOG00000003225	25.4062	0	4.36335	4.72567	0	3.32698	0	0	0	0	9.21933	0	0	0	5.48344	0	0	13.4999	0	0	0	0	0
ENSCPOG00000003228	2028.86	2496.59	1774.14	1975.33	2055.09	3141.5	1758.26	1865.6	1433.8	1835.04	1067.6	2892.99	1840.56	2650.57	2075.48	1880.61	1997.99	2212.06	2230.12	1688.11	1897.21	2877.68	2558.5
ENSCPOG00000003230	2597.78	4425.58	4959.38	5664.19	5219.68	5973.59	3748.33	5017.72	3871.93	5814.84	3089.4	5054.29	6273.41	6326	6293.16	4103.74	5419.58	4718.23	5965.02	4813.03	5496.22	4759.09	4783.28
ENSCPOG00000003232	0	25.9413	0	9.45134	0	0	10.9949	16.6571	0	0	63.6134	0	0	0	9.13906	0	4.13835	24.107	17.089	0	1.13605	0	0
ENSCPOG00000003236	1434.54	628.817	942.484	887.481	789.867	684.525	890.583	822.079	801.551	741.556	577.13	921.009	665.198	783.249	924.873	867.278	759.801	819.639	890.529	1020.08	830.455	595.382	1029.2
ENSCPOG00000003237	864.717	412.985	456.406	436.652	600.34	509.027	523.172	471.299	465.818	430.03	446.216	433.898	266.8	584.279	433.191	431.7	490.808	728.032	645.586	470.232	349.904	343.337	474.942
ENSCPOG00000003240	1425.47	1358.29	1515.83	1391.24	1602.27	1285.88	1821.48	1514.82	1837.45	1350.24	2016.27	1278.16	1341.21	1254.62	1260.28	1929.73	1311.86	1188.96	1573.14	1708.01	1167.86	1728.59	1356.15
ENSCPOG00000003241	3213.88	3836.2	3520.35	3752.18	3740.34	3482.51	3482.62	4065.32	3533.33	3504.88	3458.17	3683.01	4216.53	4013.36	3805.5	4050.74	3506.84	3606.41	3733.01	4498.3	4330.63	4466.36	4208.7
ENSCPOG00000003242	6.35154	13.4895	0	5.6708	0	0	0	0	0	0	0	0	0	0	4.56953	0	6.62136	0	0	1.244	0	0	0
ENSCPOG00000003245	91.6437	37.3554	53.2329	45.3664	38.9299	27.4476	13.7436	73.4874	37.3037	63.7415	69.145	146.338	27.0406	82.1149	21.0198	21.9728	58.7645	73.2853	37.9756	29.856	28.4013	32.746	55.1359
ENSCPOG00000003248	0	0	0.87267	0.945134	0	2.49523	0	1.95966	0.956505	0	5571.24	0	0	0	5.48344	0	0.82767	5.78569	3.79756	0	0	0	0.967296
ENSCPOG00000003249	3201.18	3125.41	2487.98	2712.53	2016.16	1840.65	2882.48	2952.23	3753.33	2169.01	4040.83	2828.52	2538.21	2049.71	2241.81	3856.87	2423.42	3192.73	2801.65	3156.02	3151.41	2719.9	2879.64
ENSCPOG00000003251	37.2019	33.2048	75.9223	51.9824	57.3703	76.5205	43.9794	49.9714	47.8253	43.9906	56.2379	60.3773	115.373	53.6905	60.3178	77.5509	36.4175	73.2853	33.2287	53.4919	64.755	121.061	47.3975
ENSCPOG00000003253	1294.81	1118.59	1041.97	1175.75	959.929	939.039	1048.18	1306.12	1186.07	926.496	1074.97	1342.63	1247.47	1047.75	920.303	1563.94	842.568	1171.6	1420.29	1568.68	1216.71	1540.05	1279.73
ENSCPOG00000003254	221.397	160.836	175.407	160.673	139.328	246.196	163.09	177.35	159.736	158.905	192.684	103.358	196.495	141.332	211.112	144.762	171.328	129.214	151.903	186.6	167	195.484	152.833
ENSCPOG00000003256	806.646	429.588	1219.12	604.886	784.744	823.427	458.119	599.657	790.073	1182.36	445.294	496.322	1115.87	513.218	657.098	801.36	790.424	490.819	873.44	945.439	864.536	850.404	829.94
ENSCPOG00000003259	13336.4	12466.3	16918.5	18012.4	17406.8	17649.6	15434	17993.6	13597.7	18161.8	12469.1	16147.3	22928.6	20913.2	19747.7	16492.5	16492.1	16862.4	18544.5	20360.5	18538.1	16893	17318.5
ENSCPOG00000003260	381.093	475.244	462.515	499.031	533.749	489.897	487.438	577.121	439.992	544.945	279.346	541.349	594.893	557.434	541.032	493.741	509.844	446.462	521.216	534.919	483.959	437.606	456.564
ENSCPOG00000003261	201.435	122.443	212.931	176.74	193.625	158.863	194.242	85.2454	162.606	182.247	306.082	195.459	183.876	160.282	223.907	227.483	128.289	211.178	172.789	177.892	161.32	154.799	141.225
ENSCPOG00000003262	88.9216	47.732	33.1615	27.4089	44.0522	28.2793	38.482	27.4353	59.3033	31.4219	35.9554	31.7236	14.4216	30.7931	37.4701	23.2653	21.5194	45.3212	36.0769	24.88	22.7211	24.8076	42.561
ENSCPOG00000003264	4.53682	17.6401	0	1.89027	9.22023	4.15872	1.83248	5.87899	2.86952	0	0	0	0	7.10609	2.74172	5.17006	0	4.8214	5.69635	2.488	7.95237	5.95382	1.93459
ENSCPOG00000003265	90.7363	156.685	114.32	51.0372	64.5416	60.7173	81.5452	94.0639	93.7375	80.799	141.978	80.8441	91.938	66.3235	75.8542	89.1836	64.5582	119.571	80.6983	69.6639	45.4421	109.153	45.4629
ENSCPOG00000003266	2857.29	4909.13	3494.17	3458.24	4058.95	4073.88	2732.22	3674.37	3594.55	3068.57	1988.61	4593.79	3230.45	3890.98	3769.86	3608.7	3683.96	3672.95	4239.98	3577.74	3960.28	3662.59	4034.59
ENSCPOG00000003271	855.643	984.731	887.505	831.718	1183.26	1220.17	909.824	1255.16	880.941	939.962	788.253	928.173	872.509	1240.41	1104.91	816.87	1323.44	676.925	1853.21	1328.59	1605.24	723.389	817.365
ENSCPOG00000003272	11.7957	8.30121	1.74534	0	1.02447	0.831744	3.66495	0	2.86952	2.6933	35.0335	11.2568	5.40812	3.15826	0	1.29252	0	5.78569	0.949391	0	0	0	0.967296
ENSCPOG00000003273	2047.01	1244.14	1592.62	1806.15	1570.51	1121.19	1754.6	1558.91	1530.41	1483.11	2624.74	1251.55	1413.32	1268.04	1510.69	1742.31	1434.35	1482.1	1370.92	1484.09	1521.17	1570.82	1539.94
ENSCPOG00000003276	58.9786	0	6.98136	3.78053	25.6118	12.4762	10.9949	4.89916	0	10.7732	32.2677	20.4669	9.01353	9.47479	10.053	2.58503	27.3131	5.78569	8.54452	4.97599	3.40816	7.93843	7.73837
ENSCPOG00000003277	1253.07	791.728	1058.55	783.516	942.513	1128.68	855.766	983.751	960.331	780.16	655.494	1145.12	807.612	777.722	724.727	873.74	945.199	977.781	1132.62	1001.42	886.121	988.334	980.838
ENSCPOG00000003278	4120.34	3921.28	3956.69	4116.06	3850.98	4141.25	3862.86	4169.19	4741.4	3714.96	4975.67	4505.78	4409.42	4956.11	3993.77	4795.23	4202.08	3971.87	4351.06	4574.18	4686.22	4582.46	4137.12
ENSCPOG00000003279	951.824	1425.73	797.62	834.553	917.926	1075.45	878.672	982.771	1061.72	836.719	1002.14	1103.16	1061.79	943.531	966.913	1040.47	966.718	1065.53	1160.16	1044.96	1159.91	979.403	872.501
ENSCPOG00000003280	447.33	239.697	274.018	227.777	305.292	272.812	236.389	301.788	281.213	294.468	291.331	231.276	333.501	311.089	397.549	404.557	302.927	242.999	300.008	308.512	341.952	305.629	313.404
ENSCPOG00000003284	2498.88	2470.65	2764.62	2968.66	2935.11	2956.85	2559.97	2719.03	2189.44	2968.92	1866.91	2965.65	3526.09	2869.28	2794.72	2797	3175.77	2703.84	2872.86	2981.86	3285.46	2583.96	2836.11
ENSCPOG00000003285	830.237	1030.39	1419.83	1299.56	1418.89	1161.11	1062.84	1178.74	1041.63	1348.45	1593.1	840.165	1642.26	1492.28	1289.52	1258.91	1408.69	1441.6	1288.32	1398.25	1434.83	1260.23	1325.2
ENSCPOG00000003286	60.7933	65.372	61.9596	98.2939	24.5873	143.06	107.2	38.2134	97.5635	61.0482	64.5353	18.4202	27.0406	68.6922	31.0728	42.653	47.1772	153.321	22.7854	52.2479	39.7619	140.907	92.8604
ENSCPOG00000003287	1534.35	2295.28	1646.73	1688.01	1525.44	1792.41	1635.48	1809.75	1854.66	1245.2	1309.14	1695.68	1164.55	1763.1	1545.42	1521.29	1676.03	1864.92	1448.77	1317.39	1373.49	1547.99	1655.04
ENSCPOG00000003291	964.527	1557.51	1029.75	864.797	1070.57	1181.91	967.547	948.477	1197.54	693.076	875.836	1365.14	659.79	885.103	1038.2	1176.19	1043.69	978.745	991.164	910.607	881.577	1084.59	1045.65
ENSCPOG00000003292	41.7387	0	0.87267	0	0	9.98093	0.916238	7.83866	5.73903	0	25.8141	0	1.80271	0	6.39734	0	0	11.5714	0	1.244	0	7.93843	1.93459
ENSCPOG00000003294	1350.16	1155.94	1045.46	1227.73	1314.4	1003.08	1249.75	1126.81	1139.2	1125.8	701.591	1128.75	758.939	1130.66	1284.95	990.067	1245.64	1216.92	1023.44	899.411	728.21	995.28	1030.17
ENSCPOG00000003295	2723	1869.85	3032.53	2258.87	2868.52	2203.29	2914.55	2447.62	2439.09	2446.42	2238.45	2083.53	1288.93	1985.76	2163.22	2000.81	2848.01	2296.92	3034.25	1895.85	1782.47	1869.5	2630.08
ENSCPOG00000003296	136.104	141.121	126.537	127.593	79.9087	132.247	91.6238	169.511	181.736	108.63	108.788	288.583	68.5028	239.238	157.192	109.864	182.087	257.463	231.651	105.74	107.925	145.869	208.936
ENSCPOG00000003297	15.4252	21.7907	21.8168	29.2991	16.3915	21.6253	16.4923	32.3345	32.5212	16.1598	2.7658	17.3968	9.01353	14.2122	17.3642	21.9728	19.8641	8.67853	12.3421	18.66	45.4421	20.8384	29.0189
ENSCPOG00000003298	500.864	155.648	407.537	348.754	272.509	413.377	496.601	273.373	375.907	306.139	278.424	432.874	335.303	342.672	340.887	435.578	440.32	411.748	417.732	404.3	295.374	474.321	395.624
ENSCPOG00000003299	2.72209	4.1506	3.49068	0	0	2.49523	0	0	0	5.3866	5.5316	2.04669	0	0	0	0	0	5.78569	1.89878	0	0	0	3.86918
ENSCPOG00000003302	20.8694	18.6777	38.3975	98.2939	39.9543	127.257	83.3776	38.2134	111.911	67.3325	73.7546	95.1709	95.5434	112.908	76.7681	98.2312	48.8325	104.142	38.925	84.5919	102.245	127.015	78.351
ENSCPOG00000003303	988.119	1257.63	1351.77	1162.51	1816.39	1745.83	969.38	1409	1275.02	1241.61	834.349	1425.52	1721.58	1406.22	3611.76	3893.06	1613.13	3892.8	1530.42	1403.23	1631.37	1724.62	1074.67
ENSCPOG00000003304	691.411	1078.12	846.49	964.981	1084.91	976.468	786.132	969.054	816.856	861.856	651.807	1181.96	915.774	971.166	955.032	850.475	889.745	845.674	953.189	905.631	1137.19	833.535	1007.92
ENSCPOG00000003305	236.822	219.982	335.105	289.211	228.457	352.66	256.547	306.687	276.43	317.81	284.877	233.322	383.976	329.249	317.125	308.911	317.825	303.748	189.878	345.832	329.455	288.76	254.399
ENSCPOG00000003307	37.2019	70.5603	63.7049	60.4886	59.4193	43.2507	41.2307	48.0118	36.3472	36.8085	23.0483	30.7003	73.9109	45.0053	72.1986	64.6258	63.7306	34.7141	36.0769	44.784	74.9795	78.392	40.6264
ENSCPOG00000003309	0	0	0	0	0	0	0	0	0	0	0	0	0	0	1.82781	9.04761	0	2.89284	0	0	0	0	0
ENSCPOG00000003311	2.72209	1.03765	0	1.89027	3.07341	0.831744	0.916238	0.979832	0	0.897767	0.921933	1.02334	0	1.57913	0.913906	9.04761	1.65534	3.85712	2.84817	2.488	7.95237	0	0
ENSCPOG00000003312	4.53682	0	6.98136	0	0	0	0	0	0	0	0	0	0	0	0	0	0	0	0	0	5.68026	0	0
ENSCPOG00000003314	947.287	1485.92	955.574	912.054	891.289	921.573	574.481	1016.09	950.766	825.048	552.238	989.573	946.42	1008.28	1050.99	819.455	1135.56	774.318	866.794	828.503	1063.35	930.781	768.033
ENSCPOG00000003315	127.031	99.6145	106.466	140.825	110.643	54.0634	55.8905	97.9832	51.6513	50.275	80.2082	134.058	70.3055	105.802	132.516	82.721	97.665	184.178	71.2043	77.1279	126.102	102.207	108.337
ENSCPOG00000003317	112.513	24.9036	11.3447	7.56107	8.19576	0	43.0632	11.758	52.6078	11.671	132.758	0	5.40812	3.15826	10.9669	18.0952	2.48301	87.7496	0	7.46399	2.27211	1.98461	6.77107
ENSCPOG00000003318	922.788	1307.44	984.372	1047.21	1063.4	1317.48	875.923	823.059	906.767	1046.8	749.532	1023.34	1445.77	1170.14	1084.81	875.033	1044.52	1166.78	826.92	990.223	1139.46	917.881	951.819
ENSCPOG00000003319	74.4038	158.761	113.447	121.922	137.279	202.946	196.075	150.894	134.867	152.62	238.781	114.614	140.611	195.812	162.675	94.3536	119.184	115.714	123.421	119.424	126.102	124.038	172.179
ENSCPOG00000003320	47.1829	38.3931	44.5062	29.2991	22.5384	34.9333	28.4034	43.1126	53.5643	20.6486	54.394	22.5136	19.8298	38.6887	32.9006	90.4761	46.3495	34.7141	31.3299	33.588	45.4421	61.5228	44.4956
ENSCPOG00000003322	2956.19	2622.14	3103.21	3230.47	3422.76	3297.87	3265.47	3859.56	3341.07	3275.05	3216.62	3357.59	3506.26	3511.99	3199.59	3158.91	3210.53	3304.59	3883.96	3401.09	3200.26	2895.54	3383.6
ENSCPOG00000003323	3.62945	0	0	9.45134	0	0.831744	2.74871	14.6975	3.82602	13.4665	13.829	7.1634	5.40812	2.3687	14.6225	0	4.13835	7.71425	0.949391	0	3.40816	0	2.90189
ENSCPOG00000003324	378.37	641.268	363.031	464.061	453.84	505.7	323.432	521.271	521.295	378.858	316.223	633.45	365.949	538.484	564.794	485.986	423.767	336.534	506.975	537.407	547.577	418.752	386.918
ENSCPOG00000003327	1988.94	2187.37	2552.56	2058.5	1848.14	2387.94	2187.06	2508.37	2806.39	2306.36	2609.07	3009.65	2112.77	2275.53	2282.02	2084.83	2214.02	2295.95	2611.78	2048.87	2116.47	2181.08	2516.9
ENSCPOG00000003328	404.684	147.346	151.845	142.715	73.7619	115.612	176.834	143.055	173.127	189.429	250.766	220.019	162.243	151.597	176.384	195.17	159.74	134.035	181.334	182.868	140.871	182.584	179.917
ENSCPOG00000003329	5900.58	2002.67	331.615	406.407	324.757	336.856	360.998	519.311	894.332	1150.04	7527.58	2186.89	405.609	262.925	381.099	116.326	359.209	3724.05	360.769	278.656	323.775	223.268	454.629
ENSCPOG00000003330	3.62945	0	6.10869	2.8354	3.07341	15.8031	0	2.9395	0	0	0	0	0	0.789566	1.82781	3.87755	0.82767	0	0.949391	0	1.13605	0.992303	0
ENSCPOG00000003331	255.876	219.982	250.456	258.021	231.53	133.911	281.285	185.188	280.256	188.531	298.706	233.322	156.835	225.816	189.179	245.578	137.393	257.463	223.107	236.36	187.449	220.291	210.871
ENSCPOG00000003332	1448.15	1082.27	1232.21	1308.06	1157.65	1039.68	1533.78	1297.3	1303.72	1348.45	1876.13	999.807	1494.44	1129.08	1323.34	1341.63	1173.64	1051.07	1224.71	1146.97	1169	1270.15	1290.37
ENSCPOG00000003335	0	1.03765	0	10.3965	0	0	0	0	0	0	0	0	0	0	0	0	6.62136	22.1785	0	0	4.54421	0	0
ENSCPOG00000003338	1245.81	1031.43	1067.28	1216.39	1312.35	1099.57	1524.62	1021.96	1129.63	1308.05	1858.62	1148.19	917.577	1050.12	1131.42	943.536	944.371	1048.17	1048.13	722.763	671.407	780.943	1186.87
ENSCPOG00000003340	235.914	350.726	226.894	373.328	189.527	341.847	203.405	388.993	299.386	368.982	253.532	357.147	429.044	434.261	407.602	170.612	336.034	392.462	242.095	287.364	345.36	255.022	308.567
ENSCPOG00000003347	534.437	343.463	298.453	653.087	299.145	214.59	171.336	316.486	238.17	660.757	849.1	376.59	205.508	465.054	296.106	153.809	381.556	348.105	416.783	248.8	137.462	204.415	362.736
ENSCPOG00000003348	0	0	7.85403	0	0	0	2.74871	1.95966	10.5216	0	0	0	0	6.31653	1.82781	3.87755	0	0	0	9.95199	1.13605	0	7.73837
ENSCPOG00000003355	9.07363	0	7.85403	0	0	1.66349	1.83248	4.89916	0	1.79553	0	5.11672	0	3.94783	3.65562	3.87755	0.82767	1.92856	0	0	0	1.98461	2.90189
ENSCPOG00000003357	2306.52	2352.36	3067.44	3946.88	3325.43	2634.97	2256.69	3218.75	3402.29	3027.27	2331.57	2749.72	3134.9	3763.86	3432.63	3081.36	3761.76	2996.98	4371.95	3574.01	3493.36	2807.23	4000.74
ENSCPOG00000003358	1425.47	1795.14	2164.22	2126.55	1891.17	2199.96	1958.92	2099.78	1868.05	2152.85	1441.9	1890.12	2668	2348.96	2019.73	1724.22	2377.07	2102.13	1847.52	2094.89	2675.4	1839.73	1816.58
ENSCPOG00000003359	1247.62	1188.11	1145.82	974.433	993.736	1225.16	1245.17	993.55	1175.55	1034.23	979.093	1184.01	868.904	1175.66	1125.93	1099.93	1061.07	1019.24	1158.26	996.443	890.665	1170.92	1031.14
ENSCPOG00000003360	425.553	364.216	349.068	308.114	407.739	332.698	322.516	331.183	348.168	406.689	303.316	441.061	337.106	338.724	400.291	376.122	302.927	458.033	399.694	391.86	347.632	446.537	359.834
ENSCPOG00000003361	1696.77	1978.8	1176.36	1441.33	1216.05	1876.41	1375.27	1747.04	1348.67	1176.97	949.591	1714.1	892.339	1997.6	1567.35	885.373	1961.58	1704.85	1861.76	1039.98	758.883	1246.33	1765.32
ENSCPOG00000003363	792.128	830.121	846.49	912.999	899.485	824.258	817.284	1212.05	858.942	997.419	1169.93	666.197	555.233	942.742	1235.6	537.686	1164.53	667.282	1027.24	773.767	879.305	873.227	995.348
ENSCPOG00000003366	458.218	602.875	445.934	420.584	208.992	318.558	289.531	448.763	472.514	279.206	686.84	312.12	420.03	284.244	367.39	571.292	465.15	501.426	280.07	496.355	508.952	367.152	423.676
ENSCPOG00000003368	320.299	690.038	363.903	484.854	432.327	440.824	321.599	497.755	426.601	366.289	506.141	437.991	576.866	452.421	429.536	305.034	519.776	500.462	378.807	354.54	457.829	458.444	470.106
ENSCPOG00000003370	814.812	1045.95	1463.47	1650.2	1543.88	2026.96	1404.59	1761.74	1193.72	1598.92	931.152	1734.57	1840.56	1984.18	1849.75	1315.78	1951.64	1291.17	1667.13	1364.67	2086.93	1397.16	1528.33
ENSCPOG00000003374	1569.74	1439.22	1437.29	1591.61	1589.98	1262.59	1695.04	1484.45	1397.45	1449.89	2400.71	1268.95	1507.06	1336.74	1401.93	1843.13	1278.75	1387.6	1355.73	1546.29	1439.38	1420.98	1398.71
ENSCPOG00000003376	16.3325	0	2.61801	4.72567	14.3426	10.8127	4.58119	20.5765	2.86952	8.97767	85.7398	17.3968	1.80271	5.52696	4.56953	5.17006	2.48301	14.4642	9.49391	1.244	11.3605	0	1.93459
ENSCPOG00000003377	1776.62	1849.09	1657.2	1514.1	1780.53	1968.74	1301.06	1624.56	1483.54	1560.32	956.967	1610.74	1703.56	1909.96	1828.73	1342.92	1849.84	1650.85	1795.3	1446.77	1400.75	1838.74	1713.08
ENSCPOG00000003379	1155.98	712.866	929.394	862.907	905.632	741.916	1034.43	758.39	801.551	1023.45	1243.69	642.66	0	750.877	816.118	2.58503	749.869	848.567	735.778	2.488	1.13605	0	999.217
ENSCPOG00000003380	1273.03	1100.95	1686.87	1312.79	1367.67	1688.44	1727.11	1646.12	1685.36	1586.35	908.104	1365.14	1903.66	1385.69	1664.22	2581.15	1648.72	1720.28	1774.41	2210.59	2894.66	2383.51	1663.75
ENSCPOG00000003381	1021.69	1179.81	2066.48	1995.18	2129.87	1991.2	1324.88	2078.22	1187.98	2179.78	1551.61	1892.16	2547.22	2244.74	2349.65	1435.98	2794.21	1965.2	1870.3	1875.95	2334.59	1784.16	1793.37
ENSCPOG00000003383	2872.71	1624.96	1907.66	2160.58	2083.77	1473.02	2040.46	2041.97	2238.22	2160.03	3354.91	2002.68	1892.84	1804.95	2107.47	2435.1	2183.39	1938.2	2165.56	2300.15	2343.68	2397.41	2023.58
ENSCPOG00000003384	307.596	408.835	340.341	313.784	439.498	351.828	348.17	326.284	424.688	338.458	524.58	302.91	329.895	345.04	338.145	456.258	379.073	356.784	271.526	342.1	288.557	367.152	314.371
ENSCPOG00000003385	4812.65	4879.04	5592.94	4303.19	4245.41	3559.03	4645.33	4325.96	5481.73	4908.99	7463.97	4095.42	4513.97	3808.08	4941.49	6385.03	3930.6	4929.4	4335.87	4025.58	4421.52	6447	5128.6
ENSCPOG00000003386	10.8884	24.9036	20.9441	8.5062	18.4405	24.1206	15.576	10.7782	4.78253	11.671	0	8.18675	5.40812	15.0018	9.13906	3.87755	21.5194	33.7498	11.3927	12.44	12.4966	22.823	16.444
ENSCPOG00000003387	5966.82	3724.13	3645.14	5259.67	2593.96	1740.01	2592.95	3896.79	3392.72	5252.84	5355.51	6099.13	2307.46	3800.97	3400.64	2521.7	3106.24	3292.05	3389.33	3846.44	2942.38	2077.88	3784.06
ENSCPOG00000003388	120.679	98.5769	49.7422	46.3115	21.5139	26.6158	64.1366	48.9916	89.9115	43.9906	62.6914	9.21009	34.2514	53.6905	51.1787	7.75509	28.1408	65.5711	46.5202	38.564	72.7074	35.7229	51.2667
ENSCPOG00000003389	479.995	469.018	568.108	304.333	498.917	665.395	348.17	417.408	362.516	443.497	366.007	319.283	351.528	545.59	318.039	270.136	515.638	426.212	445.264	318.464	231.755	471.344	462.367
ENSCPOG00000003390	83.4774	75.7485	95.121	62.3788	67.6151	67.3713	87.0426	77.4067	83.216	84.3901	72.8327	78.7974	54.0812	77.3775	104.185	95.6461	76.9733	57.8569	72.1537	77.1279	110.197	92.2842	71.5799
ENSCPOG00000003391	999.007	1296.03	1288.06	1080.29	1424.01	1225.16	1370.69	1387.44	1056.94	1201.21	1377.37	1021.3	2031.65	1358.05	1345.27	1525.17	1373.1	1131.1	1250.35	1661.98	1802.92	1465.63	1232.34
ENSCPOG00000003392	0	0	0	0	4.09788	0	0	0	2.86952	0	0.921933	0	7.21082	0	0	0	0	0.964281	6.64574	0	0	0.992303	0.967296
ENSCPOG00000003393	267.672	282.241	305.435	301.498	375.981	300.26	395.815	409.57	337.646	380.653	405.651	267.093	263.195	318.195	319.867	376.122	336.034	370.284	364.566	328.416	284.013	331.429	410.133
ENSCPOG00000003394	3355.43	4925.73	5024.83	4819.24	4975.85	5412.16	3944.4	5356.74	4124.45	4584.9	3095.85	4629.61	5476.62	6088.34	4820.85	4285.98	5151.42	4979.55	5098.23	5686.32	5504.18	4781.91	4876.14
ENSCPOG00000003395	0	0	0	0	0	0.831744	0	0	0	0	0	0	0	0	0	0	0	4.8214	1.89878	4.97599	0	0	1.93459
ENSCPOG00000003396	1762.1	1887.49	2246.25	2929.91	3086.73	3169.78	2027.63	2216.38	1477.8	2172.6	1933.29	2156.18	2752.73	2847.96	2419.11	1765.58	2266.16	1706.78	2917.48	2769.14	2695.85	1846.68	1922.02
ENSCPOG00000003397	306.689	360.065	243.475	189.027	113.716	203.777	244.635	198.906	194.171	206.486	400.119	192.389	315.473	255.819	205.629	376.122	236.714	239.142	196.524	403.056	340.816	350.283	269.876
ENSCPOG00000003399	69.867	78.8615	97.739	93.5682	107.569	98.9776	70.5503	95.0437	25.8256	110.425	59.9256	75.7274	46.8703	83.694	133.43	73.6734	72.8349	46.2855	123.421	85.8359	72.7074	78.392	32.8881
ENSCPOG00000003400	499.957	409.872	599.524	447.993	480.477	448.31	415.056	612.395	491.644	548.536	473.874	447.201	695.844	532.957	573.933	453.673	497.429	515.89	561.09	517.503	495.319	473.329	578.443
ENSCPOG00000003401	1434.54	1218.2	1220.87	1230.56	1303.13	1425.61	1192.03	1194.42	1444.32	1353.83	1225.25	1378.44	1413.32	1219.09	1378.17	1377.82	1200.12	1430.99	1149.71	1262.66	1345.09	1384.26	1161.72
ENSCPOG00000003402	867.439	1141.42	1506.23	1265.53	1467.04	1408.14	1265.32	1478.57	930.68	1258.67	1122.91	1037.67	1281.72	1615.45	1608.47	1132.24	1656.17	1386.64	1532.32	1195.48	1316.69	1321.75	1163.66
ENSCPOG00000003403	871.976	1369.7	899.723	1118.09	1102.33	1265.08	1010.61	1014.13	1487.37	1089.89	897.963	1362.07	1027.54	1233.3	1163.4	1283.47	1267.99	1186.07	1268.39	1225.34	1356.45	1193.74	1233.3
ENSCPOG00000003406	90.7363	70.5603	26.1801	54.8178	34.832	26.6158	38.482	62.7092	47.8253	30.5241	84.8178	48.0971	36.0541	50.5322	70.3708	31.0204	76.1456	31.8213	71.2043	39.808	29.5374	37.7075	60.9396
ENSCPOG00000003408	1517.11	1481.77	2649.43	2104.81	2556.05	2387.11	1914.02	2527.97	1792.49	2480.53	945.903	2081.48	3188.99	2138.93	2139.45	1623.4	2949.81	1986.42	2226.32	2201.88	2096.02	2489.69	1641.5
ENSCPOG00000003412	45.3682	14.5271	59.3416	56.708	40.9788	44.0824	90.7075	77.4067	70.7814	85.2879	98.6468	8.18675	75.7136	53.6905	55.7483	51.7006	26.4854	29.8927	38.925	78.3719	89.7482	92.2842	36.7572
ENSCPOG00000003418	0	0	0	7.56107	0	0	0	0	0	0	14.7509	0	0	0	0	0	0	3.85712	1.89878	0	2.27211	0	0
ENSCPOG00000003422	515.382	562.407	629.195	725.863	710.983	593.865	728.409	727.035	624.598	827.741	778.111	506.555	1079.82	897.736	740.264	776.802	829.325	692.354	686.41	852.139	955.42	933.757	684.846
ENSCPOG00000003424	2063.34	1407.05	1734.87	1796.7	1682.18	1752.48	1580.51	1505.02	1453.89	1840.42	1454.81	1871.7	1882.02	1840.48	1698.04	2101.63	1771.21	1871.67	1691.82	1930.69	1917.66	1934	1805.94
ENSCPOG00000003428	0	0	0	0	0	0	0	0.979832	0	0	0	0	1.80271	0.789566	0	0	0	0	0	1.244	3.40816	4.96152	0
ENSCPOG00000003429	44.4608	267.714	0	5.6708	34.832	47.4094	4.58119	22.5361	28.6952	3.59107	188.074	143.268	122.584	34.7409	91.3906	25.8503	62.0752	98.3566	4.74696	63.4439	184.041	124.038	130.585
ENSCPOG00000003430	367.482	269.789	418.882	271.253	274.558	383.434	281.285	187.148	219.04	248.682	259.985	458.458	284.827	432.682	471.576	266.258	475.082	472.498	445.264	429.18	270.381	343.337	423.676
ENSCPOG00000003431	1.81473	6.22591	6.98136	3.78053	9.22023	3.32698	9.16238	1.95966	0.956505	0	13.829	7.1634	12.6189	7.89566	1.82781	11.6326	1.65534	7.71425	17.089	4.97599	15.9047	14.8846	3.86918
ENSCPOG00000003432	659.653	785.502	705.117	828.882	636.196	825.09	694.508	828.938	578.686	792.728	673.933	755.228	1108.66	855.889	938.582	743.196	939.405	632.568	638.94	784.963	991.774	621.182	750.622
ENSCPOG00000003433	308.503	239.697	796.748	571.806	741.717	777.681	423.302	617.294	424.688	765.795	557.769	339.75	1032.95	852.731	1129.59	577.754	770.56	610.39	849.705	634.439	1057.67	719.42	639.383
ENSCPOG00000003435	12.7031	0	0	3.78053	0	0	1.83248	0	9.56505	2.6933	2.7658	0	1.80271	0	1.82781	0	0.82767	22.1785	0	0	0	0	0
ENSCPOG00000003438	850.199	488.734	616.978	476.347	743.766	505.7	616.628	695.681	767.117	570.98	854.632	512.695	647.171	443.736	604.092	929.319	594.267	695.247	647.485	633.195	630.509	680.72	555.228
ENSCPOG00000003440	46.2755	42.5437	87.267	82.2266	127.034	106.463	103.535	164.612	142.519	130.176	114.32	220.019	158.638	139.753	180.039	161.564	168.845	110.892	112.028	133.108	195.401	134.953	114.141
ENSCPOG00000003442	983.582	1051.14	818.564	756.107	810.356	1029.7	967.547	764.269	719.292	825.048	651.807	924.079	676.015	950.637	890.144	699.251	873.191	1065.53	888.63	789.939	739.57	789.874	911.193
ENSCPOG00000003444	9828.56	8574.11	10918.8	11438	10907.5	10184.7	12441.6	11375.8	10740.6	12333.5	13132.9	9960.2	14208.9	11500	10700.9	12701.5	9862.51	10317.8	10646.5	13585.7	11346.9	12521.9	11159.7
ENSCPOG00000003445	71.6817	108.953	82.9037	87.8974	70.6885	55.7269	90.7075	67.6084	165.475	61.9459	35.0335	77.7741	66.7001	70.2714	47.5231	103.401	82.767	78.1068	46.5202	116.936	118.15	72.4381	78.351
ENSCPOG00000003446	2177.67	1640.53	2356.21	1481.02	2378.82	2024.47	2239.28	1594.19	1841.27	1869.15	1662.25	1725.36	1361.04	1810.47	1718.14	1540.68	1851.5	1958.45	2096.26	1494.04	1130.37	1728.59	1772.09
ENSCPOG00000003447	2239.37	2090.87	2171.2	2429.94	2580.64	2347.18	2166.9	2213.44	1946.49	2651.11	2881.96	1964.82	2851.88	2300.8	2632.05	2096.46	2351.41	2219.77	2296.58	2221.78	2297.1	2322.98	2433.72
ENSCPOG00000003448	3570.47	4810.55	4520.43	4922.26	4858.04	4669.41	4493.23	5363.6	4348.27	4732.13	4540.52	4795.39	4714.07	5346.94	5329.9	4543.19	4830.28	4885.05	4906.45	5028.24	4961.14	4643.98	5114.09
ENSCPOG00000003449	30.8503	175.363	135.264	154.057	192.6	187.974	79.7127	183.229	90.868	200.202	111.554	178.062	185.679	235.291	220.251	76.2584	284.718	135.964	155.7	95.7879	138.598	114.115	170.244
ENSCPOG00000003450	382.907	354.877	419.754	391.285	459.987	441.656	496.601	335.103	347.211	422.848	333.74	369.427	277.617	431.893	374.701	286.938	437.01	349.07	382.605	293.584	322.639	379.06	409.166
ENSCPOG00000003451	102.532	20.753	1.74534	55.7629	0	4.99046	19.241	55.8504	65.0424	39.5018	278.424	46.0505	0	0	4.56953	12.9252	9.93203	94.4995	0	0	15.9047	0	0
ENSCPOG00000003453	1243.99	567.595	1135.34	622.843	898.461	689.516	909.824	948.477	840.768	996.522	1019.66	688.71	620.131	633.232	808.807	921.563	958.441	649.925	1192.44	1102.18	754.339	746.212	732.243
ENSCPOG00000003455	0	0	0	0	0	12.4762	0	0	9.56505	15.262	172.401	0	0	0	7.31125	6.46258	5.79369	14.4642	27.5323	0	0	0	0
ENSCPOG00000003458	1676.81	1877.11	1713.05	2399.69	1709.84	2136.75	1232.34	1893.04	1652.84	2017.28	1173.62	1730.47	2440.86	2496.61	2220.79	1650.54	2348.1	1918.92	1791.5	2157.09	2467.51	1728.59	2001.34
ENSCPOG00000003459	2.72209	26.9789	54.9782	80.3364	33.8075	44.0824	37.5657	35.274	18.1736	39.5018	41.487	12.2801	68.5028	31.5826	49.3509	56.8707	52.9709	5.78569	36.0769	44.784	40.8979	49.6152	32.8881
ENSCPOG00000003461	1051.63	1073.97	897.105	847.785	574.728	601.351	1197.52	1114.07	977.548	764	2107.54	987.526	838.258	697.976	856.33	1171.02	705.174	788.782	861.098	1236.53	1051.98	890.096	967.296
ENSCPOG00000003463	2133.21	2925.14	2337.01	2718.2	2296.86	2379.62	2144.91	2801.34	2616.04	2503.87	3837.09	2152.09	3169.16	2522.66	2484.91	2361.43	2618.75	2595.84	2330.76	2572.59	2816.28	2565.1	2587.52
ENSCPOG00000003464	1284.83	862.288	1035.86	867.633	923.048	998.093	886.002	954.356	1110.5	957.918	945.903	942.499	764.347	866.943	850.847	921.563	1032.1	1119.53	1093.7	972.807	861.128	959.557	1152.05
ENSCPOG00000003465	897.382	975.392	1028.01	988.61	981.443	826.754	1156.29	899.486	1004.33	913.927	1132.13	834.025	856.285	786.408	880.092	1001.7	851.672	998.031	938.948	1027.54	970.189	1092.53	908.291
ENSCPOG00000003466	1499.87	1326.12	1651.96	1583.1	1772.33	1580.31	1881.04	1998.86	1836.49	1942.77	2212.64	1158.42	1847.77	1712.57	1732.77	1919.39	1757.97	1592.03	1999.42	1956.81	1838.13	1795.08	1800.14
ENSCPOG00000003467	4500.52	3779.13	3409.52	3710.59	3968.8	3857.63	4603.18	3808.61	3840.37	4414.32	7110.87	3432.29	5310.77	3906.77	3861.25	4424.28	4178.08	4047.09	4078.58	4019.36	3820.55	4675.73	3642.84
ENSCPOG00000003468	740.408	537.503	497.422	841.169	615.707	713.636	495.685	549.686	417.036	668.837	305.16	639.59	526.39	800.62	671.721	523.469	489.98	586.283	526.912	510.039	519.176	561.644	547.49
ENSCPOG00000003470	1256.7	2071.15	1777.63	1745.66	1640.18	2271.49	1605.25	1849.92	1456.76	1771.29	1523.96	2121.39	1936.11	2097.09	1918.29	1619.52	1908.61	1881.31	2136.13	1975.47	1910.84	1579.75	1710.18
ENSCPOG00000003471	1.81473	8.30121	0.87267	5.6708	1.02447	3.32698	0.916238	4.89916	8.60855	4.48884	1.84387	8.18675	0	0.789566	2.74172	5.17006	4.96602	5.78569	1.89878	0	3.40816	3.96921	1.93459
ENSCPOG00000003472	1371.03	1921.73	1722.65	1606.73	1871.71	1991.2	1411.01	1842.08	2226.74	1484.91	1550.69	2173.58	2145.22	1929.7	1786.69	1750.07	2139.53	1460.89	2243.41	1862.27	2163.04	1995.52	1610.55
ENSCPOG00000003473	0	4.1506	0	0	15.3671	4.99046	0	4.89916	2.86952	2.6933	89.4275	0	14.4216	4.7374	0	0	7.44903	46.2855	12.3421	0	1.13605	0	6.77107
ENSCPOG00000003474	0	35.2801	0	17.0124	6.14682	12.4762	32.9846	10.7782	0	0.897767	5.5316	5.11672	3.60541	20.5287	8.22515	7.75509	0	5.78569	0	3.732	1.13605	21.8307	16.444
ENSCPOG00000003475	0	1.03765	1.74534	0.945134	0	0	0	0.979832	0	0.897767	0	0	0	0.789566	0	0	4.13835	8.67853	0	0	0	5.95382	0
ENSCPOG00000003476	186.917	63.2967	21.8168	43.4761	0	2.49523	0	6.85882	0	40.3995	76.5204	21.4902	7.21082	18.9496	6.39734	1.29252	30.6238	32.7855	34.1781	0	10.2245	8.93073	3.86918
ENSCPOG00000003477	728.613	931.811	767.95	757.997	635.172	636.284	900.662	868.131	706.857	771.182	1321.13	766.484	874.312	691.66	595.867	791.019	698.553	743.461	592.42	811.087	756.611	771.02	762.229
ENSCPOG00000003478	114.328	66.4097	49.7422	81.2815	44.0522	90.6601	76.0477	36.2538	67.9119	67.3325	39.6431	52.1905	73.9109	62.3757	39.298	89.1836	75.3179	50.1426	55.0647	79.6159	54.5305	131.976	78.351
ENSCPOG00000003479	1855.56	1319.89	1674.65	1752.28	1870.68	1295.03	1627.24	1492.28	1535.19	1380.77	1865.07	1374.35	1692.74	1699.15	1579.23	1659.59	1607.33	1571.78	1738.34	2051.35	1779.06	1681.95	1538
ENSCPOG00000003484	0	0	0	0	0	0	5.49743	0	0	0	0	0	0	0	0.913906	0	0	7.71425	5.69635	0	0	0	0
ENSCPOG00000003485	120.679	208.568	173.661	164.453	192.6	153.873	191.494	222.422	139.65	236.113	401.041	114.614	192.889	168.178	195.576	236.53	163.879	135.964	115.826	186.6	215.85	158.769	173.146
ENSCPOG00000003486	21.7767	29.0542	50.6149	67.1045	19.4649	29.9428	20.1572	26.4555	14.3476	23.3419	30.4238	26.6069	14.4216	18.16	42.0397	16.8027	48.0048	60.7497	16.1397	21.148	38.6258	24.8076	24.1824
ENSCPOG00000003487	995.377	728.431	948.592	800.528	906.656	742.748	1031.68	724.096	875.202	968.691	1102.63	924.079	917.577	806.147	857.244	995.237	756.49	862.067	768.057	940.463	798.645	944.673	828.005
ENSCPOG00000003488	129.753	141.121	61.9596	10.3965	28.6852	12.4762	43.9794	15.6773	48.7818	17.9553	98.6468	17.3968	27.0406	29.2139	30.1589	82.721	36.4175	101.249	13.2915	31.1	23.8571	33.7383	31.9208
ENSCPOG00000003489	363.853	148.384	323.761	217.381	262.264	168.012	115.446	327.264	295.56	314.219	108.788	251.743	252.379	128.699	189.179	307.619	246.646	177.428	246.842	131.864	273.789	215.33	230.216
ENSCPOG00000003490	333.91	244.886	604.76	494.305	745.815	538.97	372.909	821.099	614.076	710.134	351.256	476.878	776.966	477.687	511.787	423.945	743.247	521.676	699.701	630.707	760.019	427.683	372.409
ENSCPOG00000003491	608.841	596.649	705.117	694.673	801.136	502.373	602.884	665.306	708.77	713.725	767.97	597.633	751.728	720.874	655.271	867.278	712.624	716.461	763.311	814.819	688.448	788.881	723.537
ENSCPOG00000003493	2291.09	1702.79	3506.39	3977.12	3835.62	4095.51	2715.73	2413.33	2827.43	3805.64	2076.19	3186.69	4721.29	3704.64	3439.94	3655.23	5932.74	1764.63	4861.83	2215.56	2949.19	4208.36	2768.4
ENSCPOG00000003496	874.698	942.187	970.409	1047.21	1020.37	973.141	1048.18	998.449	902.941	1091.68	1445.59	997.76	1278.12	873.26	934.926	1393.33	871.536	1024.07	767.108	1057.4	1021.31	1034.97	913.127
ENSCPOG00000003499	0	0	0	0	92.2023	0	0	0	0	0.897767	227.717	0	0	0	4.56953	0	0	0	30.3805	0	0	0	0
ENSCPOG00000003503	141.549	83.0121	89.0123	127.593	87.08	80.6792	161.258	142.076	120.52	95.1633	226.796	95.1709	55.8839	58.4279	79.5098	116.326	67.0412	112.821	82.597	103.252	86.34	91.2919	123.814
ENSCPOG00000003504	0	0	1.74534	0.945134	3.07341	0.831744	1.83248	0	1.91301	1.79553	0	7.1634	1.80271	2.3687	1.82781	1.29252	1.65534	8.67853	0.949391	1.244	3.40816	1.98461	0
ENSCPOG00000003507	63.5154	68.485	25.3074	18.9027	0	34.1015	54.9743	48.0118	65.0424	49.3772	24.8922	3.07003	36.0541	23.687	25.5894	24.5578	14.0704	50.1426	5.69635	23.636	17.0408	27.7845	29.0189
ENSCPOG00000003508	594.323	628.817	682.428	447.048	523.504	499.046	549.743	511.472	699.205	518.909	457.279	750.111	353.33	678.237	740.264	500.203	747.386	607.497	778.501	537.407	619.149	561.644	667.434
ENSCPOG00000003510	205.064	313.371	309.798	308.114	331.928	243.701	352.752	261.615	224.779	241.499	244.312	229.229	261.392	326.091	249.496	348.979	206.917	210.213	274.374	314.732	249.932	251.053	202.165
ENSCPOG00000003512	2151.36	1830.42	2392.86	2521.62	3065.22	2788.84	2090.85	3103.13	2164.57	2360.23	1857.7	2578.83	3149.33	2907.18	2591.84	1841.83	2917.54	2371.17	2849.12	2647.23	2685.63	2772.5	2279.92
ENSCPOG00000003514	0	2.0753	0	5.6708	0	1.66349	2.74871	0	1.91301	0	0	2.04669	0	2.3687	6.39734	0	1.65534	0	3.79756	0	2.27211	0.992303	1.93459
ENSCPOG00000003516	3970.62	2460.27	2108.37	3929.87	2539.66	4295.13	4517.97	3362.78	3192.81	3972.62	1530.41	5571.08	1991.99	4830.56	4772.42	2251.56	3170.8	4196.55	2431.39	1905.81	2155.09	1829.81	3908.84
ENSCPOG00000003517	1521.65	1241.03	2008.89	1882.71	1869.66	2091.84	1910.36	1925.37	1343.89	2058.58	1590.33	1924.91	1930.7	2153.94	2274.71	1252.45	2120.49	1609.38	1825.68	1800.07	1382.58	1724.62	2062.28
ENSCPOG00000003519	0	2.0753	2.61801	3.78053	1.02447	2.49523	5.49743	4.89916	0	2.6933	0	0	0	0	3.65562	7.75509	5.79369	11.5714	3.79756	0	4.54421	0	0
ENSCPOG00000003522	856.551	1516.01	1657.2	1712.58	1467.04	1577.82	1231.42	1769.58	1194.68	1427.45	1246.45	1611.77	2195.7	1831	1471.39	1297.69	1906.95	1593.96	1728.84	1591.07	1985.82	1193.74	1312.62
ENSCPOG00000003525	28.1283	0	0	0	88.1045	18.2984	4.58119	12.7378	43.9992	10.7732	214.81	0	18.0271	2.3687	5.48344	2.58503	3.31068	70.3925	46.5202	1.244	19.3129	1.98461	0
ENSCPOG00000003526	567.102	591.461	363.903	325.126	256.118	493.224	337.175	358.619	342.429	403.995	1024.27	430.828	425.438	332.407	430.45	329.591	374.934	675.961	314.248	220.188	362.401	241.13	326.946
ENSCPOG00000003527	510.845	616.365	599.524	654.032	511.211	496.551	685.346	610.435	511.73	503.647	944.981	442.084	859.89	597.701	528.238	540.271	646.41	530.354	501.279	695.395	683.904	759.112	642.285
ENSCPOG00000003532	627.895	547.88	571.599	561.409	608.535	530.653	665.189	523.23	489.731	511.727	275.658	582.282	392.99	555.854	532.807	484.693	678.689	527.462	703.499	374.444	371.489	440.583	473.008
ENSCPOG00000003533	253.154	349.688	370.012	367.657	327.831	427.516	390.317	320.405	423.732	395.018	400.119	460.505	539.009	386.887	416.741	258.503	454.391	264.213	276.273	373.2	403.299	387.991	350.161
ENSCPOG00000003534	73.4964	24.9036	0	8.5062	12.2936	0	0	0.979832	0	4.48884	24.8922	18.4202	0	0.789566	0.913906	5.17006	2.48301	19.2856	0	0	0	0	0
ENSCPOG00000003535	4367.14	3413.87	4209.76	3780.53	4442.1	3603.95	4592.18	4164.29	3923.58	4041.75	3990.13	3854.93	4077.72	3632	3331.19	4289.86	3037.55	3612.2	3893.45	4887.67	4084.11	4782.9	4039.43
ENSCPOG00000003537	0	0	0	0	7.17129	0	0	0	0	0	9.21933	0	0	0	0	0	0	5.78569	0	0	0	0	0
ENSCPOG00000003540	2203.99	2632.52	2816.98	3262.6	3359.24	3335.29	2535.23	3097.25	2232.48	3126.03	1830.96	2823.4	3533.3	3440.14	3254.42	3078.77	3583.81	2907.31	2788.36	3192.1	3313.87	2832.03	3335.24
ENSCPOG00000003541	820.256	646.457	507.021	354.425	422.082	437.497	385.736	444.844	511.73	350.129	295.941	561.816	450.676	311.879	329.006	558.367	389.005	501.426	494.633	471.476	418.067	431.652	358.867
ENSCPOG00000003542	1427.28	1503.56	1270.61	1385.57	1407.62	1237.64	1272.65	1188.54	1604.06	1352.04	1761.81	1356.95	1063.6	1352.53	1404.67	1324.83	1221.64	1221.74	1339.59	1176.82	1266.7	1365.41	1278.77
ENSCPOG00000003543	1571.55	1410.17	1226.97	1242.85	1389.18	1607.76	1376.19	1214.99	1408.93	1462.46	1054.69	1369.23	1294.34	1400.69	1588.37	1292.52	1496.43	1501.39	1483.9	1219.12	1224.67	1251.29	1341.64
ENSCPOG00000003545	1503.5	1404.98	1264.5	1380.84	1171.99	1258.43	1374.36	1258.1	1380.24	1085.4	1426.23	1019.25	1382.68	1248.3	1220.06	1423.06	1401.24	1373.14	1248.45	1260.17	1198.54	1236.41	1290.37
ENSCPOG00000003548	1147.81	995.107	1015.79	1100.14	1051.11	924.068	1080.24	999.429	1086.59	1036.92	543.019	986.503	984.277	1185.93	997.072	1088.3	1021.34	1107.96	1208.57	1059.89	967.917	1105.43	1183
ENSCPOG00000003549	992.655	1197.45	1218.25	1114.31	964.027	1213.51	1172.78	1175.8	1115.29	1104.25	1211.42	1032.55	1443.97	1329.63	1125.02	1207.21	1214.19	1052.99	983.569	1097.21	1141.73	1192.75	1227.5
ENSCPOG00000003552	907.363	841.535	662.357	775.01	529.651	612.995	1367.03	1329.63	1121.02	569.184	1268.58	720.434	676.015	688.502	638.82	1097.35	646.41	964.281	798.438	905.631	791.829	1259.23	743.851
ENSCPOG00000003553	3761.93	3814.41	2884.17	3037.66	2847	2867.02	3486.28	2339.84	4011.58	2500.28	3538.38	3181.57	2532.8	2421.6	2547.97	3660.4	2792.56	2662.38	3087.42	3098.8	2946.92	3839.22	3073.1
ENSCPOG00000003554	739.501	565.52	598.652	465.006	566.532	479.916	642.283	479.138	618.859	588.038	834.349	549.535	317.276	447.684	527.324	431.7	475.082	512.033	514.57	413.008	358.993	513.021	583.279
ENSCPOG00000003556	0	0	0	0	0	0	0	0	0	0	0.921933	0	0	0	2.74172	12.9252	0	3.85712	0	0	2.27211	0	0
ENSCPOG00000003558	220.489	301.956	410.155	351.59	405.69	291.11	219.897	381.155	336.69	247.784	161.338	416.501	227.141	387.677	323.523	263.673	323.619	293.141	415.833	307.268	327.183	386.998	350.161
ENSCPOG00000003559	0	14.5271	6.98136	1.89027	0	8.31744	0	3.91933	16.2606	0	27.658	0	1.80271	16.5809	9.13906	0	0	18.3213	0	0	4.54421	1.98461	0
[truncated: 15,897 more rows]

## Sheet: PC-H vs PC-C
gene_name	baseMean	log2FoldChange	lfcSE	stat	pvalue	padj	GeneName	Fold Change	Inv Fold Change
ENSCPOG00000010370	7.86379	20.0772	5.77146	3.4787	0.000503846	0.0446599	Gprin3	1.10622e+06	9.03977e-07
ENSCPOG00000040535	4.80342	18.7075	3.53665	5.2896	1.22587e-07	0.000210074	Ndp	428066	2.33609e-06
ENSCPOG00000040264	6.99693	18.5971	2.74255	6.78096	1.19382e-11	1.20926e-07	Rnasep_Nuc	396544	2.52179e-06
ENSCPOG00000037790	13.3526	8.90416	2.50835	3.54982	0.000385502	0.0399897	Pou2Af1	479.093	0.00208728
ENSCPOG00000030579	7.56491	7.06628	1.96773	3.59109	0.0003293	0.0387694	Bach2	134.018	0.00746168
ENSCPOG00000019649	6.18654	6.76031	1.89681	3.56404	0.000365192	0.0399897	Hpdl	108.407	0.00922452
ENSCPOG00000009093	4.05969	6.21318	1.76802	3.51421	0.000441068	0.0412278	Cap11	74.1914	0.0134786
ENSCPOG00000007205	11.2658	5.3439	1.36004	3.92923	8.52166e-05	0.0180041	Siglec1	40.614	0.0246221
ENSCPOG00000003276	12.3505	4.56762	0.971245	4.70285	2.5656e-06	0.0017204	Fzd7	23.7132	0.0421707
ENSCPOG00000009141	35.9455	3.3761	0.914353	3.69233	0.000222206	0.0319542	Fcmr	10.3826	0.096315
ENSCPOG00000015194	1380.14	3.21191	0.576672	5.56973	2.5514e-08	9.83754e-05	Abcg1	9.26575	0.107924
ENSCPOG00000000654	23.788	3.04249	0.752963	4.04069	5.3294e-05	0.0126454	Dcx	8.23912	0.121372
ENSCPOG00000002439	401.1	2.6634	0.522487	5.09755	3.44083e-07	0.000408214	Srebf1	6.33526	0.157847
ENSCPOG00000033449	124.434	2.6402	0.685018	3.85421	0.000116103	0.0210666	Snai2	6.2342	0.160406
ENSCPOG00000037151	105.561	2.52325	0.605719	4.16572	3.10372e-05	0.00886458	Tuba4A	5.74877	0.17395
ENSCPOG00000033306	32.154	2.49924	0.723103	3.45626	0.00054772	0.0473504	7Sk	5.65386	0.17687
ENSCPOG00000034875	53.8155	2.23354	0.592479	3.76982	0.000163365	0.0261117	Limd2	4.70287	0.212636
ENSCPOG00000019579	221.102	2.21219	0.605534	3.65329	0.0002589	0.0350265	Cited4	4.63379	0.215806
ENSCPOG00000014503	61.2751	2.19805	0.571078	3.84895	0.000118623	0.0212736	Plekhg7	4.58859	0.217932
ENSCPOG00000006019	42.8095	2.03378	0.536883	3.78812	0.000151792	0.0251729	Samsn1	4.09476	0.244215
ENSCPOG00000030709	172.172	1.93759	0.463543	4.17995	2.91575e-05	0.00864799	Tm4Sf18	3.83064	0.261053
ENSCPOG00000032751	702.598	1.9	0.416858	4.5579	5.16677e-06	0.00294801	Scd1	3.73213	0.267944
ENSCPOG00000010983	353.271	1.71985	0.491303	3.50058	0.000464244	0.0431327	Colec12	3.29402	0.303581
ENSCPOG00000035749	141.973	1.64471	0.455778	3.60857	0.00030789	0.0383639	Tspan11	3.12684	0.319812
ENSCPOG00000010328	1400.61	1.52911	0.434551	3.51883	0.000433453	0.0410644	Olfml2B	2.88608	0.34649
ENSCPOG00000039699	4229.56	1.52232	0.398874	3.81655	0.000135331	0.0234519	Ifi27	2.87253	0.348125
ENSCPOG00000002917	1001.28	1.49863	0.222301	6.74145	1.56812e-11	1.20926e-07	Mylip	2.82575	0.353888
ENSCPOG00000040776	1727.14	1.46294	0.401409	3.64452	0.000267886	0.0358554	Glrx	2.7567	0.362752
ENSCPOG00000038000	6655.31	1.41733	0.406974	3.4826	0.000496565	0.0442689	Ifi27L2	2.67091	0.374405
ENSCPOG00000026227	774.836	1.38714	0.284761	4.87124	1.10897e-06	0.000900195	Meox2	2.6156	0.382322
ENSCPOG00000014142	3057.78	1.28371	0.356611	3.59974	0.00031853	0.0383639	Ackr3	2.43464	0.410739
ENSCPOG00000002793	153.2	1.2138	0.293755	4.13201	3.59607e-05	0.0097302	Tuba8	2.31948	0.431132
ENSCPOG00000022112	1137.68	1.20871	0.320739	3.76851	0.000164225	0.0261117	Scx	2.31131	0.432656
ENSCPOG00000020871	435.88	1.14403	0.250145	4.57346	4.79737e-06	0.00284577	Pdlim2	2.20997	0.452495
ENSCPOG00000023826	341.124	1.11097	0.299049	3.715	0.000203202	0.0307254	Tnfaip8	2.1599	0.462983
ENSCPOG00000034611	461.622	1.07179	0.226052	4.74131	2.12337e-06	0.00163439	Chchd4	2.10203	0.47573
ENSCPOG00000014637	466.32	1.047	0.251928	4.15596	3.23927e-05	0.0090835	Samd4A	2.06623	0.483973
ENSCPOG00000036786	13400.8	1.04053	0.194338	5.35424	8.59177e-08	0.000165639	Dynll1	2.05699	0.486148
ENSCPOG00000004169	28051	1.03583	0.254254	4.07398	4.62163e-05	0.0114967	Hspa8	2.05029	0.487736
ENSCPOG00000008531	492.859	1.02854	0.269899	3.81084	0.000138494	0.0237332	Ifit5	2.03996	0.490205
ENSCPOG00000032286	2203.1	1.01555	0.180149	5.63729	1.72747e-08	8.88092e-05	Smco4	2.02168	0.494638
ENSCPOG00000006177	2827.72	1.01394	0.197995	5.12106	3.03825e-07	0.000390492	Manf	2.01942	0.495191
ENSCPOG00000023626	2340.39	0.955769	0.264779	3.60968	0.000306576	0.0383639	Stmn3	1.93961	0.515567
ENSCPOG00000030119	391.473	0.945412	0.254902	3.70893	0.000208139	0.0308666	Dctpp1	1.92574	0.519281
ENSCPOG00000003912	131.922	0.891774	0.247796	3.59882	0.00031967	0.0383639	Prim2	1.85546	0.538951
ENSCPOG00000027361	530.455	0.884757	0.256053	3.45536	0.00054955	0.0473504	Ccdc86	1.84645	0.541579
ENSCPOG00000040784	19908.7	0.866911	0.204935	4.23019	2.33498e-05	0.00825491	Ppp1R2	1.82375	0.548319
ENSCPOG00000038347	4148.4	0.862198	0.157082	5.48883	4.04613e-08	0.000109255	Cacybp	1.81781	0.550114
ENSCPOG00000037780	505.517	0.830486	0.212511	3.90796	9.3077e-05	0.018576	Timm13	1.77828	0.56234
ENSCPOG00000003921	984.22	0.804856	0.22875	3.5185	0.000433995	0.0410644	Medag	1.74697	0.572419
ENSCPOG00000003761	365.616	0.795481	0.222103	3.5816	0.000341502	0.0393058	B4Galt4	1.73566	0.576151
ENSCPOG00000024508	580.297	0.785356	0.212034	3.70392	0.000212296	0.0311832	Avpi1	1.72352	0.580209
ENSCPOG00000004417	435.613	0.767229	0.202262	3.79325	0.000148686	0.0249259	Aamdc	1.702	0.587545
ENSCPOG00000033943	698.4	0.740459	0.182128	4.0656	4.79099e-05	0.0117288	Rras2	1.67071	0.598549
ENSCPOG00000007234	1700.4	0.718334	0.206626	3.4765	0.000508012	0.0447718	Lhfpl6	1.64528	0.607799
ENSCPOG00000034561	403.106	0.713192	0.195781	3.64281	0.000269677	0.0358554	Utp23	1.63943	0.609969
ENSCPOG00000012006	445.608	0.682411	0.193623	3.52443	0.000424398	0.0410644	Tmem53	1.60482	0.623123
ENSCPOG00000008489	915.819	0.676668	0.137863	4.90828	9.18789e-07	0.000795095	Hspa14	1.59844	0.625608
ENSCPOG00000031031	1394.36	0.651174	0.168542	3.86357	0.000111744	0.0207641	Tmem11	1.57045	0.636762
ENSCPOG00000027474	1912.49	0.64919	0.185953	3.49115	0.000480939	0.0438907	Hspe1	1.56829	0.637638
ENSCPOG00000004212	1289.21	0.629256	0.128254	4.90633	9.27946e-07	0.000795095	Pla2G12A	1.54677	0.64651
ENSCPOG00000034909	1188.97	0.620572	0.180382	3.44032	0.00058102	0.0489676	Ssna1	1.53748	0.650413
ENSCPOG00000009643	817.62	0.615585	0.173327	3.55158	0.000382929	0.0399897	Prkch	1.53218	0.652665
ENSCPOG00000015691	941.25	0.611436	0.156131	3.91617	8.99664e-05	0.018485	Prkag2	1.52778	0.654545
ENSCPOG00000032075	2501.73	0.608882	0.131506	4.63008	3.65529e-06	0.00225502	Txnl1	1.52508	0.655704
ENSCPOG00000038958	1313.23	0.605947	0.121037	5.00631	5.54832e-07	0.000570478	Eif1Ad	1.52198	0.65704
ENSCPOG00000037853	2989.3	0.605125	0.165434	3.65781	0.000254376	0.034821	Ndufv2	1.52111	0.657414
ENSCPOG00000005502	1134.31	0.602666	0.16563	3.63863	0.000274091	0.0359299	Mcts1	1.51852	0.658536
ENSCPOG00000037379	7880.42	0.601778	0.157566	3.81922	0.000133874	0.0234519	Znf706	1.51759	0.658941
ENSCPOG00000035272	3085.68	0.599167	0.167524	3.57659	0.000348104	0.0395766	Dnajb1	1.51484	0.660135
ENSCPOG00000010890	1283.02	0.596323	0.159958	3.72799	0.000193013	0.0294737	Cwf19L1	1.51186	0.661438
ENSCPOG00000037075	885.205	0.596224	0.169652	3.5144	0.000440744	0.0412278	Rps19Bp1	1.51176	0.661483
ENSCPOG00000032974	1555	0.586747	0.167736	3.49805	0.000468673	0.0431944	Smim12	1.50186	0.665842
ENSCPOG00000006268	2132.19	0.581883	0.136516	4.26239	2.02256e-05	0.00794963	Sertad1	1.4968	0.668091
ENSCPOG00000039908	9623.94	0.581238	0.127731	4.55049	5.35203e-06	0.00294801	Ywhah	1.49613	0.66839
ENSCPOG00000033475	828.735	0.580699	0.137715	4.21667	2.47942e-05	0.00825491	Znf131	1.49557	0.66864
ENSCPOG00000040764	658.825	0.567434	0.157413	3.60475	0.00031245	0.0383639	Dnajc25	1.48189	0.674816
ENSCPOG00000003116	1314.36	0.562871	0.156447	3.59783	0.00032088	0.0383639	Wee1	1.47721	0.676954
ENSCPOG00000011613	2267.75	0.561549	0.158451	3.54399	0.000394115	0.0399897	Dync1Li1	1.47585	0.677574
ENSCPOG00000002197	1352.45	0.519054	0.109695	4.7318	2.22539e-06	0.00163439	Phf11	1.43302	0.697829
ENSCPOG00000015285	671.544	0.51819	0.142443	3.63787	0.000274897	0.0359299	Fntb	1.43216	0.698247
ENSCPOG00000014855	1226.41	0.515211	0.127252	4.04875	5.14921e-05	0.0124088	Aimp2	1.4292	0.699691
ENSCPOG00000001055	2798.06	0.508224	0.141822	3.58353	0.000338985	0.0393058	Dnajb11	1.4223	0.703088
ENSCPOG00000002752	4923.93	0.500064	0.135833	3.68146	0.000231901	0.0328129	Vdac2	1.41428	0.707075
ENSCPOG00000033773	987.819	0.497902	0.133103	3.74072	0.000183495	0.0283005	St3Gal3	1.41216	0.708136
ENSCPOG00000007796	5642.5	0.494114	0.137037	3.60569	0.00031132	0.0383639	Xbp1	1.40846	0.709998
ENSCPOG00000011908	3900.68	0.489218	0.138805	3.5245	0.000424279	0.0410644	Ube2A	1.40368	0.712411
ENSCPOG00000001258	521.747	0.480417	0.139238	3.45032	0.000559916	0.0477104	Znhit6	1.39515	0.71677
ENSCPOG00000031361	735.852	0.479985	0.130058	3.69056	0.00022376	0.0319542	Ntmt1	1.39473	0.716985
ENSCPOG00000013194	3222.85	0.47546	0.115958	4.10028	4.12649e-05	0.0109369	Rbm4	1.39036	0.719238
ENSCPOG00000031693	4059.12	0.46111	0.110506	4.17273	3.00967e-05	0.00875814	Akirin1	1.3766	0.726427
ENSCPOG00000036902	4356.81	0.456092	0.126263	3.61225	0.000303557	0.0383639	Arpc5L	1.37182	0.728958
ENSCPOG00000006044	4165.77	0.448285	0.103066	4.34949	1.36453e-05	0.00601291	Ube2L3	1.36442	0.732914
ENSCPOG00000031980	2175.97	0.440722	0.11362	3.87892	0.000104922	0.0197342	Prelid1	1.35728	0.736766
ENSCPOG00000012867	2873.18	0.436129	0.122287	3.56645	0.000361855	0.0399897	Cct2	1.35297	0.739115
ENSCPOG00000023539	4075.84	0.424206	0.12041	3.52302	0.000426664	0.0410644	Arpc4	1.34183	0.745249
ENSCPOG00000035635	1477.81	0.391586	0.100068	3.91318	9.10886e-05	0.018485	Tusc3	1.31183	0.762291
ENSCPOG00000006865	6885.22	0.390665	0.113792	3.43314	0.000596633	0.0497398	Cnn3	1.311	0.762778
ENSCPOG00000009131	7192.65	0.360498	0.103416	3.48589	0.000490509	0.0442405	Cct3	1.28387	0.778896
ENSCPOG00000036299	4069.11	0.336365	0.081308	4.13692	3.51996e-05	0.00969436	Cdc42Se1	1.26257	0.792034
ENSCPOG00000002375	4640.8	-0.529719	0.138599	-3.82196	0.000132396	0.0234519	Hbp1	0.69269	1.44365
ENSCPOG00000037830	1496.17	-0.55307	0.149065	-3.71025	0.000207053	0.0308666	Rfx5	0.681568	1.46721
ENSCPOG00000022520	2461.96	-0.55628	0.147175	-3.77971	0.000157012	0.0257616	Arhgef10	0.680053	1.47047
ENSCPOG00000011846	1093.93	-0.557013	0.133082	-4.18549	2.84551e-05	0.00863559	Unkl	0.679708	1.47122
ENSCPOG00000000193	2272.73	-0.561383	0.15275	-3.67517	0.000237691	0.0330262	Gpd2	0.677652	1.47568
ENSCPOG00000007380	1060.67	-0.575121	0.160831	-3.57593	0.000348986	0.0395766	Fhip1B	0.67123	1.4898
ENSCPOG00000009384	539.547	-0.589108	0.167071	-3.5261	0.00042173	0.0410644	Nrf1	0.664754	1.50432
ENSCPOG00000024373	1266.63	-0.591472	0.165544	-3.5729	0.000353044	0.0397445	Ttc31	0.663666	1.50678
ENSCPOG00000014698	1118.18	-0.591647	0.168075	-3.52015	0.000431309	0.0410644	Casp2	0.663585	1.50697
ENSCPOG00000002696	2171.28	-0.611481	0.162435	-3.76447	0.000166903	0.0262668	Limk2	0.654524	1.52783
ENSCPOG00000009382	280.706	-0.611594	0.172049	-3.55477	0.000378303	0.0399897	Maml1	0.654473	1.52795
ENSCPOG00000009203	590.786	-0.625405	0.147042	-4.25325	2.10688e-05	0.00794963	Hars2	0.648238	1.54264
ENSCPOG00000010430	1412.04	-0.625477	0.14809	-4.22364	2.40389e-05	0.00825491	Tecpr1	0.648206	1.54272
ENSCPOG00000014150	2219.05	-0.636832	0.172176	-3.69872	0.000216689	0.0315283	Tcp11L2	0.643124	1.55491
ENSCPOG00000026583	572.843	-0.659094	0.134146	-4.91326	8.95749e-07	0.000795095	Pigq	0.633276	1.57909
ENSCPOG00000010736	870.8	-0.662544	0.17612	-3.76189	0.000168633	0.026271	Zfyve26	0.631763	1.58287
ENSCPOG00000039845	852.956	-0.662578	0.148978	-4.44748	8.68831e-06	0.0041875	Tmem231	0.631748	1.58291
ENSCPOG00000006668	1128.48	-0.665283	0.168377	-3.95115	7.7775e-05	0.0168947	Cntrl	0.630565	1.58588
ENSCPOG00000033349	1779.73	-0.670396	0.172041	-3.89673	9.74998e-05	0.0190347	Tmem62	0.628334	1.59151
ENSCPOG00000007709	2405.83	-0.678235	0.165541	-4.09708	4.18387e-05	0.0109369	Zc3Hav1	0.62493	1.60018
ENSCPOG00000001529	1676.36	-0.691456	0.158086	-4.37392	1.22037e-05	0.00553581	Frmd4A	0.619229	1.61491
ENSCPOG00000039926	4063.2	-0.6995	0.16621	-4.20854	2.5703e-05	0.00825871	Srsf5	0.615785	1.62394
ENSCPOG00000002749	36447.9	-0.700488	0.19054	-3.67633	0.000236609	0.0330262	Arrdc3	0.615364	1.62505
ENSCPOG00000007266	1080.93	-0.71133	0.200512	-3.54757	0.000388805	0.0399897	Polg	0.610757	1.63731
ENSCPOG00000006697	18112	-0.718542	0.167294	-4.29509	1.74621e-05	0.00708731	Npnt	0.607711	1.64552
ENSCPOG00000012504	1017.13	-0.722061	0.20308	-3.55554	0.000377203	0.0399897	Capn10	0.606231	1.64954
ENSCPOG00000009392	530.57	-0.740708	0.208069	-3.55992	0.000370972	0.0399897	Top3A	0.598445	1.671
ENSCPOG00000001064	742.291	-0.764397	0.222067	-3.44219	0.000577016	0.0488974	Tep1	0.588699	1.69866
ENSCPOG00000014874	488.371	-0.766615	0.209626	-3.65706	0.000255123	0.034821	Dennd6B	0.587795	1.70127
ENSCPOG00000008917	840.411	-0.770861	0.183884	-4.1921	2.76386e-05	0.00863559	Srgap2	0.586068	1.70629
ENSCPOG00000009958	569.849	-0.796368	0.228271	-3.48869	0.000485394	0.0440367	Qrich1	0.575797	1.73672
ENSCPOG00000006094	1660.37	-0.80164	0.225352	-3.55729	0.000374707	0.0399897	Akap11	0.573697	1.74308
ENSCPOG00000002140	1093.32	-0.805864	0.213418	-3.77599	0.000159374	0.025874	Ints1	0.572019	1.74819
ENSCPOG00000009886	293.071	-0.823481	0.23831	-3.4555	0.000549265	0.0473504	Tmtc4	0.565077	1.76967
ENSCPOG00000038833	249.374	-0.82923	0.202965	-4.08558	4.39673e-05	0.0111165	LincRNA	0.56283	1.77674
ENSCPOG00000013121	370.254	-0.830029	0.240563	-3.45035	0.000559854	0.0477104	Cdh24	0.562518	1.77772
ENSCPOG00000009072	1813.47	-0.834833	0.154239	-5.41259	6.21197e-08	0.000136867	Tshz1	0.560648	1.78365
ENSCPOG00000012425	2242.55	-0.836463	0.243602	-3.43373	0.00059533	0.0497398	Nfat5	0.560015	1.78567
ENSCPOG00000031246	545.802	-0.849739	0.234879	-3.61777	0.000297147	0.0383639	Arid1B	0.554885	1.80217
ENSCPOG00000000320	1391.39	-0.854682	0.219994	-3.88502	0.000102319	0.0194824	Fnbp4	0.552987	1.80836
ENSCPOG00000007011	11507.7	-0.856881	0.214061	-4.00299	6.25479e-05	0.0141864	Ltbp1	0.552145	1.81112
ENSCPOG00000022690	1509.58	-0.876063	0.219634	-3.98875	6.64235e-05	0.014635	Top1Mt	0.544852	1.83536
ENSCPOG00000011340	790.826	-0.880605	0.208355	-4.22646	2.37391e-05	0.00825491	Oplah	0.54314	1.84115
ENSCPOG00000025567	348.506	-0.887647	0.191188	-4.6428	3.43727e-06	0.00220888	Gmeb2	0.540495	1.85016
ENSCPOG00000010054	786.937	-0.92444	0.264352	-3.49701	0.000470509	0.0431944	Nod2	0.526885	1.89795
ENSCPOG00000005784	366.932	-0.927021	0.258373	-3.58792	0.000333325	0.038946	Tet2	0.525943	1.90135
ENSCPOG00000037087	182.539	-0.956328	0.271606	-3.52101	0.000429905	0.0410644	Slc25A40	0.515367	1.94036
[truncated: 38 more rows]

## Sheet: PR-H vs PR-C
gene_name	baseMean	log2FoldChange	lfcSE	stat	pvalue	padj	GeneName	Fold Change	inv Fold Change
[truncated: 16 more rows]

[truncated: 10 more sheets: PR-C vs PC-C, PR-H vs PC-H, PC-C-H vs PC-C-C, PR-C-H vs PR-C-C, PR-C-C vs PC-C-C, PR-C-H vs PC-C-H, PC-C-C vs PC-C, PC-C-H vs PC-H, PR-C-C vs PR-C, PR-C-H vs PR-H]
